# Supplementary material for: Single Nematode Transcriptomic Analysis, Using Long-Read Technology, Reveals Two Novel Virulence Gene Candidates in the Soybean Cyst Nematode, Heterodera glycines
Source: MDPI journal article supplement (doi:10.3390/ijms24119440), 2023-05-29
Supplement: s1 [file s1]

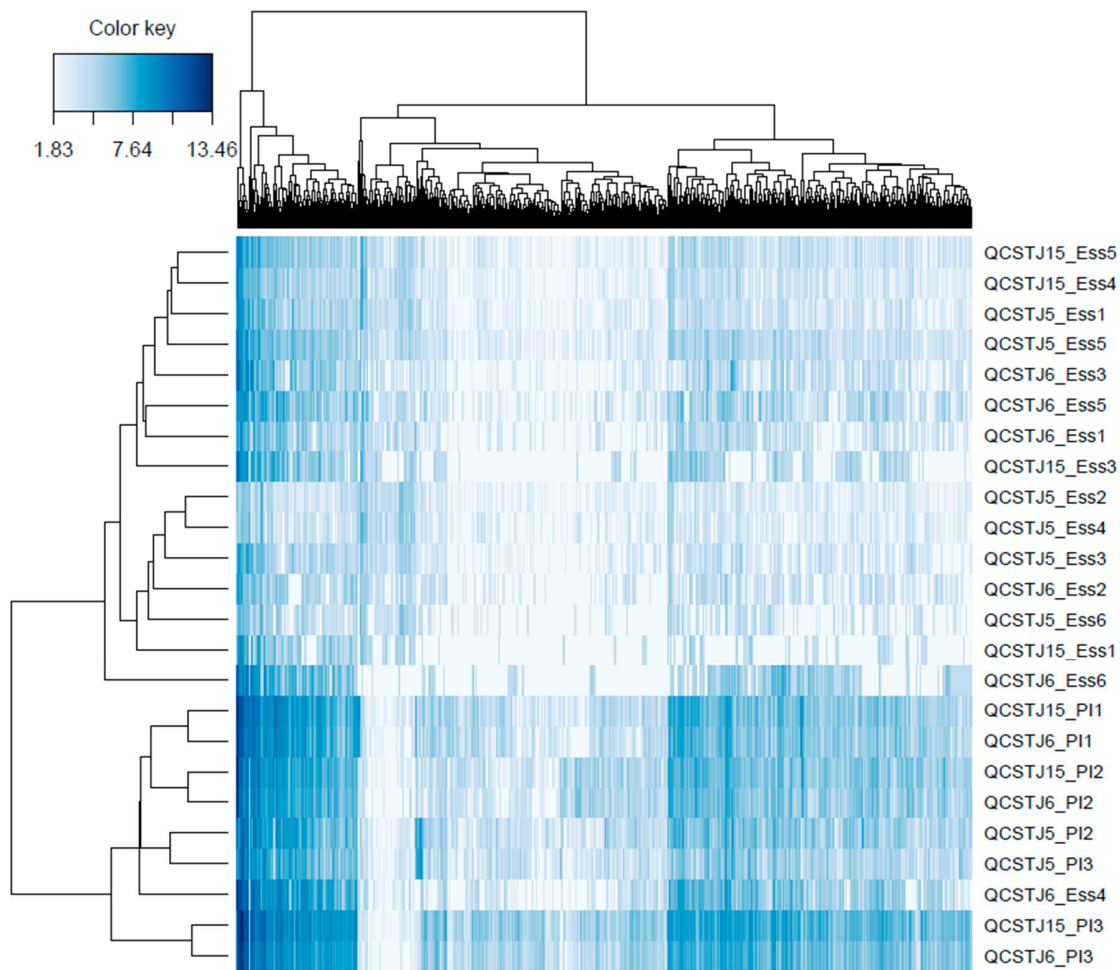

**Figure S3:** Clustered image map of normalized transcripts counts with expressional clustering of individual *Heterodera glycines* nematode transcriptomic profiles
