# Supplementary material for: Single Nematode Transcriptomic Analysis, Using Long-Read Technology, Reveals Two Novel Virulence Gene Candidates in the Soybean Cyst Nematode, Heterodera glycines
Source: MDPI journal article supplement (doi:10.3390/ijms24119440), 2023-05-29
Supplement: s1 [file s1]

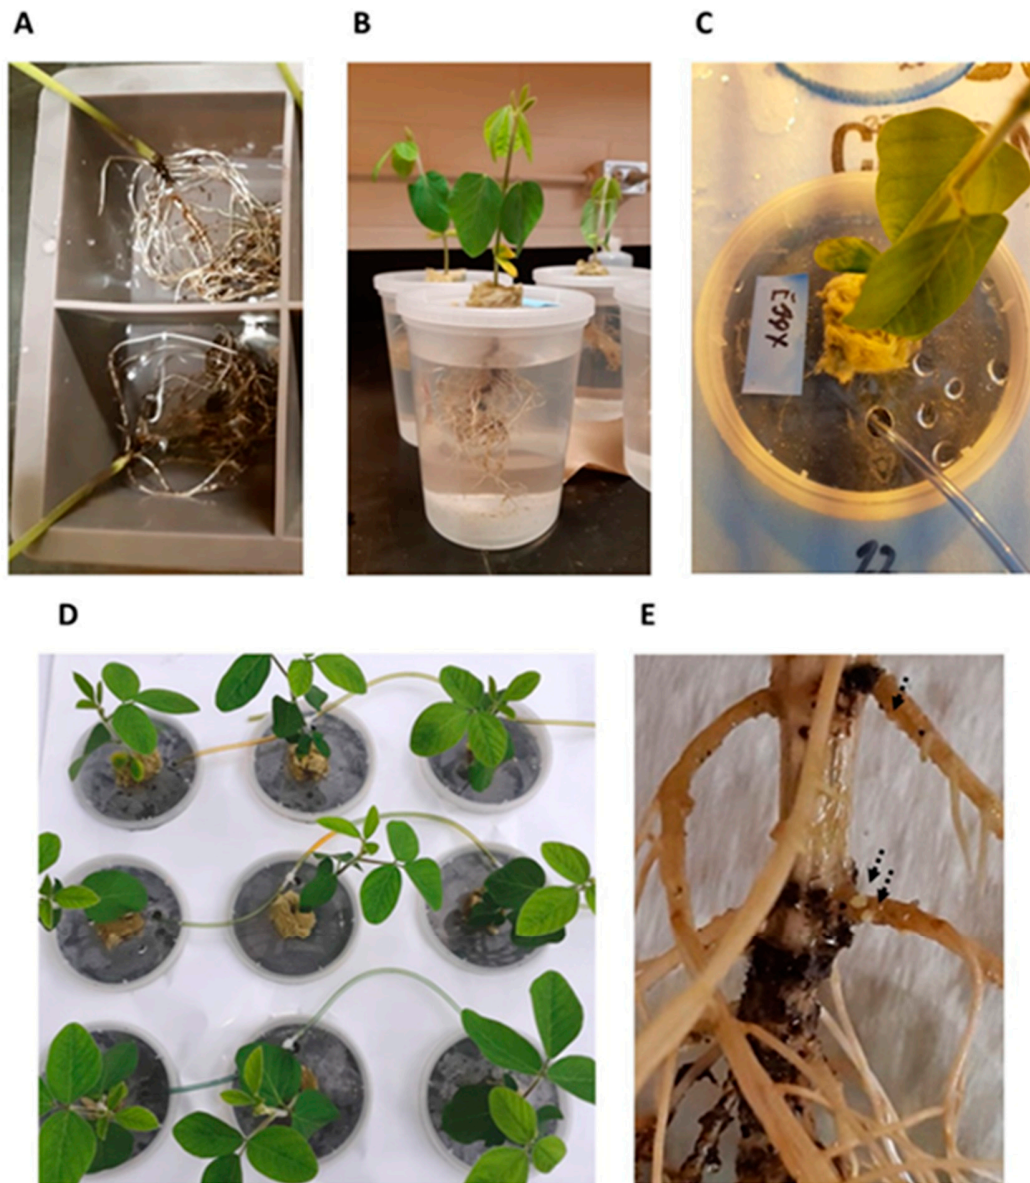

**Figure S2:** Picture of an (A) submersed inoculation cell. a (B) Hoagland solution-filled container with inoculated plant ready for the hydroponic system. a (C) close-up of rock wool plant support in the container lid and a (D) general view of containers in the Styrofoam board floating in the water table. (E) Indicated by arrows are individual females of *Heterodera glycines* visible at the surface of the roots 18 DAI.
