# Supplementary material for: Single Nematode Transcriptomic Analysis, Using Long-Read Technology, Reveals Two Novel Virulence Gene Candidates in the Soybean Cyst Nematode, Heterodera glycines
Source: Int J Mol Sci. 2023 May 29;24(11):9440. doi: 10.3390/ijms24119440 (PMC10253548; doi:10.3390/ijms24119440)
Supplement: Supplementary file 1 [file ijms-24-09440-s001.zip › File_S1.txt]

#File S1: Fasta sequence file of known and novel transcripts and corresponding gene model identified in Heterodera glycines through single nematode sequencing.
>Hetgly06024.t1 gene=Hetgly06024
TTGTACCTCTTTTAATCACTTTTGTACCTCAAAATTTAAATAACGGGCGCTAAGCGCCCGTCCAAGGCCGCGAAGCGGCCTAACAAGCTAAAAAACGGGCGCGAAGCGCCCGTATGAGTTCAACGGATTTAAAAAACGGGCGCGAAGCGCCCGTCCAAGTCCAACAAAATTTGAAAAACGGGCGCGAAGCGCCCGTCTTGAGCCTCGATGTGGACTAAAAACCCCTAATAATTTTTTAAAAATTCAAAAAAATCTCTCCAACC
>Hetgly06025.t1 gene=Hetgly06025
ATGGGAGCAATCCCCATAAGAGTGTTTAAGGGCAAACGGTATGGGGATGTGGCCATCCCCCTAGCAAACGGTATGGGGATGGTGGCCATCCCTCTAGCAAACGCAAACGGTATGGGGATGGTGGCCATCCCTCTAGCAAACGGTATGGGGATGGTGGCCATCCCCCTAGCAAACGGTATGGGGATGTTGTACATCCTCCTAGCAAACGGTATGGGGATGGTGGCCATCCCCCTAGCAAACGGTATGGGGATGGTGGCCATCCCTCTAGCAAACGGTATGGGGATGGTGGCCATCCCCCTAGCAAACGGTATGGGGATGGTAGCCATCCCCATAGCAAACGGTATGGGGATGGTAGCCATCCCCATAGCAAACGGTATGGGGATGGTGGCCATCCCCCTAGCAAACGGTATGGGGATGGTGGCCATCCCCCTAGCAAACGGTATGGGGATGGTAGCCATCCCCATAGCAAACGGTATGGGGATGGTGGCCATCCCTCTAGCAAACGGTATGGGGATGGTGTCCATCATAGGATTCATCACTATACGCAGGGATTCTGA
>Hetgly06026.t1 gene=Hg1
CGCGACAAATGCTCAGTGTGGACATGTGGGAGAAGCAGCAGCGACTGATCACTTTGAACAATTTTTGCGTGGACATGGAGCTGTTCAAGCACTGCGGAGGGCGACGCGTTGGATCAGTTGGGGCTGCGTCACTACTGCTGCCTTTGGATGTTGTTGTCGCACGTGGACCTGATCGAAAAGCTGCCCAGCAAGCGCACTTTGGATGGACATTCTCCCCTTTTGACCGTCCTCAACTCGGCCACAAATTGGCATTGCTTTCGCCCCGTTTCAATGCTCCAGTG
>Hetgly06027.t1 gene=Hetgly06027
AGAGGTACAACAGTGATCAGAAGAGGTACAACTGTGATCAGAAGAGGTACAACAGTGATGAGAAGAGGTACAACAGTGATGAGAAGAGGTACAACAGTGATGAGAAGAGGTACAACAGTGATGAGAAGAGGTACAACAGTAAATAGAAGAGGTACAACAGTGATTAAAAGAGGTACAAAAGTAATTAAAAGAGGTACAACAGTAATTAAAAGAGGTACAACAGTAAATAGAAGAGGTACAACAGAGATTAGAAGAGG
>Hetgly06028.t1 gene=Hg3
AAGAGGAACGGAAAGTGGAAGATAAAGTGGAAGAGGAACAGAAAAAAGTGGAAGAGAAATGTAAGAGGAACAGAAAGTGGAAGAGAAAGTGGAAGAGGAACAGAAAAAAGTGGAAGAGGAACAGAAAGTGGAACAGAAAGTGGAAGAGAAACAGAACAAAGTGGAAGAGAAATTTGTAAGAGGAACAGAAAGTGGAAGAGAAAGTGGAAGAGAAAGTGGAAGAGGAACAGAAAGTGGAAGAGAAAGTGGAAGAGGAAAAGAAAGTGGAAGAGAAAGTGGAAGAGGA
>Hg3.2 gene=Hg3
AAAGTGGAAGGAACAGAATGTGGAAGAGAAAGTGGAAGAGGAACAGAAAGTGGAAGATAAAGTGGAAGAGGAACGGAAAGTGGAAGATAAAGTGGAAGAGGAACGGAAAGTGGAAGATAAAGTGGAAGAGGAACGGAAAGTGGAAGATAAAGTGGAAGAGGAACAGAAAGTGGAAGATAAAGTGGAAGAGGAACAGAAA
>Hetgly06029.t1 gene=Hetgly06029
ATGGACTGGTCCATAGTGGGGCCCTGGTTGGCACTTTGCCGTAATGGACCGACCGCTAATGGACTGGCACGCTCGAAATGGAGTTTGTCCGAAAGCGGTAGGCCGGGTACCGCTTCCAACATTTGTATGTGGCAGGACCCGGCCTACCGCTTTTTTGCCAGATTACACGATTTGAAAGGCGGACGGCGTTTAGTTAGCACGCCAAACCCGGCCATCTTTCAAAGAGCGCCTCCCCTAACAAGACATGAAGCTCATCCGCGACTCCATCCTCTCGGGGAACTTTGCCGTGAACGAAATGGGAAACAACAATATGATAGTGTGGACGGTGCCGGTGCCACGAAACGCGGGGCCTCAAGGGGTCGCGCCGCCGCGCCCTTTGGCACCGTCTTGCCCGCCGCCGCCACCACAATTGCCGGTTTTCCCGCCGCCGCCACCACAATTGCCGTTTTTACCGTCGCCGCCACAAATCGGCATGGCGCCGTTTTGCCCGCGGCCGCCGCAAATGGGCCCAGTACTTGCGCCACTCGCTCTTCCGCCGCTGGCACCGGCGCCACTTCCGCTGCCATCATGCTCGACCTTCGCGAACCCATTCGGTGTCCGCGCACCGCCAAACAAATGCGCGGTGTGCGGACGCCGTTTTCTGGCGCCTCGTCGACGTGCGACAACGGAAAAGCTGCCGAGTGCAAAAAAGGCGCGGGTTCACGGGCCAGAGGAGCCAATGGACGAGGAATAGTGGGTGGCGTGGTGGGGAGTGAAATTTGA
>Hetgly06030.t1 gene=Hetgly06030
AAATACCTGAGTCAAAAATTGTTGGGAACACCTGGCTGGCACCCAGAAATGAAACAAACAAATGGCTATAAAAGTCTAACAAGACTACAATATGCAAGTTGTTGTATGGCTGTAAGAAATGAGTTTAATCCGTTGTTATTTGGTGGGAAATTATTTCAGCAATGGATGCAATGACCATTGTTCGAAGATTTGGAAAACCAGACTTATTTGTTACAATGACATGTAACCCAAAATGGGAAGAAATTCAAGAAAATTTATATAAAGAACAAGATCCTAGCGACCGACCAGATATTATTGACCGTGTTTTTAATCTAAAAATTAAGGCACTTTTAAGAGATGTAACGAACCAAGTTTTTGGATTTTGTATTGCTTGGATGTATCCCGTTGAGTTTCAATTGAGAGGACTCCCACATATTCATTTACTTATTACATTGGCACAAAAAGACAAATTACACGATGGAGAAGATGTAGATAAAAGGGG
>Hetgly06030.t2 gene=Hetgly06030
AAATACCTGAGTCAAAAATTGTTGGGAACACCTGGCTGGCACCCAGAAATGAAACAAACAAATGGCTATAAAAGTCTAACAAGACTACAATATGCAAGTTGTTGTATGGCTGTAAGAAATGAGTTTAATCCGTTGTTATTTGGTGGGAAATTATTTCAGCAATGGTGTGTTGATGAATATGTCAAAATTGAAAATGATAGATTAAAATGGATTCGAAATAATCAAAAAAAGATTTTGGCAGATTCTTATAAAAATGTAGATAGTTTTTTACTTAAAAGGTCTCAAGAAACAGGTCTTCCAGTTGGAAGAAAAATTATTTTACCTTCGACAATTGTAGGGTCACCTAGATATATTGAAAAACATTTCCAGGATGCAATGACCATTGTTCGAAGATTTGGAAAACCAGACTTATTTGTTACAATGACATGTAACCCAAAATGGGAAGAAATTCAAGAAAATTTATATAAAGAACAAGATCCTAGCGACCGACCAGATATTATTGACCGTGTTTTTAATCTAAAAATTAAGGCACTTTTAAGAGATGTAACGAACCAAGTTTTTGGATTTTGTATTGCTTGGATGTATCCCGTTGAGTTTCAATTGAGAGGACTCCCACATATTCATTTACTTATTACATTGGCACAAAAAGACAAATTACACGATGGAGAAGATGTAGATAAAAGGGG
>Hetgly06031.t1 gene=Hg8
ATGTGCGTTGGCGTGCCCGCCGTTCTGTCCATGCTTTTGGCAAATATCAACGCGCACTATGCCCACGCGACAGAAACCGCGGCCGTTTCTGCGCCTGACCGTTTCAACGCCACCAACGCCGGACAACAGCCGAGGCCGAGGACAACGAGCAGTGCAATTGGTGGTGGTGGTGGTACTGCTGACGAACTGCAACAGGAGGCGGAGGACAACGAAAGTGTTTTGCTGAACGGCGCCGAATCGCCGACCCCCGGCGGCGGCACTTTGGGCTACGCAATTTTGGCGGAGGACTCCAAAACGCCGGCCCCATTCTATGAAATGATGAGCGAAAGTGAGCTGAATGCCGAACTTGCAAAGTATGGCCATGGTCCGATGGGAAAACGTACGGCTATCCGACTTTTGAACCGAATTTATGAGGCAACACACCCAGTGATTTCAAGCGACACGCCAATCCCGCGGAAAGTGCGGCGCGCATTGGCGACGGACGACGGCGGCGGTGATAAAAATGGGGCGGCTGAACGGCAACGGGAACGGAGGACCAAGCAAAAAATTGGCCAAATGTTGCGGTTGGCCAACAAAAATGCCGAGACGGAGACGACAGGGAATTATGCCAAGCAAAACGACGACGGTGGCGGCGATGGATTTGCCAACAATGCCAAAGAAAACGGTGCCGGACAAATGGCGGCGCCAACAATATCTAAACAACAACAACGGCACGGACAGCAGCAACAGCGGGGCCGTGGACGCGACGGCAACGAAGGATGCATTTTATTGCCTCCGCCGACGCTCGAAGGAGTGTTGGCCGAATTGAACGGCACAATTTGCGCGTTGGAGCAATTGTTGGAGCAGCGACAGCGCATCCGACAAAAATTGGTGGTTTAG
>Hg9.1 gene=Hg9
TTTTTTTTTTGTTTTTTTCTGTTCTTCTTTTTTGTTTTTGGGTTATGGTCCCAAAAGCCTTAACAGCCCCAAATTTTCAAAATAAAATAAAAATTTTTCCAAATTCAAGAAAATTTATTTGTAAAAGTGAATACAATGCTATTGGCGGCCAAGTGAGATTCTTTCTTGAAAGAACACGAAATGTCTATGAAGACAAATCGCCTGGCGGCATAAAATATGAGCGTTTGCAGTTCCCAATAAAGCCTGCATTCGCTATGACCATTCAAAAAGGTCAGGGCCAAACAATCCGCACTGTCGGCATTGATCTGGAAAGGGAAGTATTTTCCCACGGTCAATTGTATACGGCCTTCTCTCGGGCAACAGACGGAAACAATGTCCGTGTTCATGCTCCCAACCGGGAAATTGATGCCCAAGGCCGAGCCAAAGTGCTGAATATTGTAGCTACTAATATGCTCAAGTTACAATAAATGGCTTAGTCCAGAGCAGTTGGGCACATGGTTTTTGGAGAGATGCCAATCCCATTCCCATCTGCACTATGTTGGGTGCGAAAATGGTGAGAAGCTTGGATCCGGGACATGGACCGGTCAGCCCTCTTTAGGGCCTACAGGTGAATTGCCATTTAGCGCTCAACCCAATAACGTGCCAACGCCTGGACTAAGGGAGGGAGGAGGGCCATGACGTGCAACGTTAGGGCACTTCCGGTTTCCATTGCATTATGCGATGTGTCAACTCCAATTATTGGAGGAAACCAAGTGCATGTCGGCTGACGCAAAGACCCTAACAGACTAAAACGCGCCTAGGTAGCGAAGCTCAAGAAGCGCGCAGCGCTTTCCCAAGCGCCACCCTCGCATGCACACACCCGCTAGTTTATATAC
>Hetgly06032.t1 gene=Hg10
CATCATTCTTCGCCATGGAGTGTAGTCGTCCTGTGCTGAAATCCATCAGTCAGGGCTCACACATCTCAATAAGAATGCAGATGCAAAAGTTGCTGCGACACAGTCCCCGAAGGGCCTGTCAGCGAACCACATTGGTGCGACAATGCCCCGAAGGGAATGTCAGCGAACCGTATTGGTGCGACACATGCCCCAAAGGGCCAGTCAGCGAACCGTATTGGTGCGACACGTGCCCCGAGGGCCAGTCAGCGAACCGTATTGGTGCGACACGTGCCCTGAGGGGCCAGTCAGCGAACCGCATTGGTGCGACACATGCCCGAGGGCCAGTCAGCGAACCGTATTGGTGCGACACGTGCCCTGAGGGGCCAGTCAGCGAACCGCATTGGTGCGACACATGCCCCGAGGGGCCAGTCAGCGAACCGCATTGGTGCGACACATGCCCCGAGGGGCCAGTCAGCGAACCACAAC
>Hetgly06033.t1 gene=Hg12
ATGCAAAATCCGACGAAAATCCGAAATGTGCCAAATGCGCATATTGCCGCCTTTTTATTGCCTTATTTGGATGACACGCCCACTCGTAGCAGTGAAGTGTATGACCAGGAGGAGCAGCGGATGATACGCAATGTGAAGCAATGGGAGCAGGACCCGCACTATTTTAAGGAAGTCAAAATTTCGGCCTTGGCCCTGCTCAAAATGTGCCGGGTGGACGCCAACACAATCATTGTGCTGGACGCTTTTGCACTGCCGGTGGTCGGCTGGTACCACTTTCATCCGGACTACGCCTGCTGGCTGAACGGCATTGACGTGAACACGCAGTCCATCAACCAGCAATTCCAGGAGCCCTTTGTTGCCATTGTGATTGACCCGATTCGGACCGTCAGTGCAGGAAAAGTGGACATTTGCGCGTTTCGCACCTACCCAAAAGTTGCTTTGCAATTTCCCGAGGGCCTTACAATCACTACCTGCGCTGATTGCACTACGGAGGCCGACGCGTTGGATCAGTTGGGGCTGGGCCGCTACTGCTGCCGTCGGATGCGGCTGTCACACGTGGACCTGACCGAAAAGCTGCTCAACTACGATACTGAACTGTTAAACTCGGGCCGTGACTTTGACTTCGCCATCGTTGCCTTCGGAGTGCTTGCATTGGACGAGCGAATGCAAAGCTGCCTAAGCTTACAGGACTTTCTGACGCGGTGGAATTTTTTTTTGTAA
>Hetgly06034.t1 gene=Hetgly06034
ATGACAAATCTGATTGGGCTATTTTTATTTGTAAAGTGCGTGAATTATTGCCAAAATATCAGTTCCATGACTGCGGGCGCCATTGCTTAAACCATAAAGGGAAATGTAAAAAAGGTTTTCCAAAGCCGTTTAGTAAATTCACAATTTTACATGATGATCGACCAGCTATTTATTTCCGTCCGAGTACCGAAGATGGTGGGCAAACATTGACTGTTAAAAGAGGAAAAACACAAATAACTTATGATAATTCACGAGTGTCCATACAAATATCCATTCAAAGGTCCCAGTTTTTCGTACGTAAAGACTAATGAAGAAAATGGAAAAACAGGTATTGATGAGCCTGCTTATTATGCTAGAATGTTATATCGTTCATCCCCTGAGGCCTATTGCCGGATCATGTCGCTCAAATATGCTAAATTATCTCATACCGTTATTGCGTTGTCACTCCATTTGCCCGCGTCCGTCGCTCAGCAGGTTCAGGCAGGCATTTTGCCCGAAACCCCTTTAACAGCTTATTGGAAAATGTGTGAAACGGATACTGACCGTATGCCTGAACAGTATTCATTCAACAAATCTGGTAAATTTTGGAAAAAACGAATTTTTTCAAAAAATCCGAGTCGGTCAAAAACACGTGAAAGAAAGCCAATTATTGGCCGAATTTACCCGGTTTCACCACGAAATCCTGAGTTATTTGCATTATATTTACTGACAAAACATTTCCCCGGAAACCCGCAACAATTAAAAATGGTAAACCCCACGCATATCTGTCAAACATTTCTGGAGACAGCCCGACTCAAGGGGCTTATTGATGACAATGATGTGTGGGTTCGGACAATGGAGGAGGGTGCTGCCTCGCTCACCCCAGCACAAATGCGTCAATTGTTTGCTAATATACTAATTTTTGGAGCCACTGA
>Hetgly06035.t1 gene=Hg13
GCCATTGTTTATTTTACATTGACGAAAATGCCGACACTTTGATCGAATCGGAGGGATTTTTGCAAATTGACCAAAAAATGTTGTGCGAAATTTTGGAACGCGACGAATTGCAAATCCGTGAAGAAATTTCAATGTGGAATGCGAATTTTGCCTGCCATTGTTTATTTTACATTGACGAAAATGCCGACACTTTGATCGAATCGGAGGGATTTTTGCAAATTGACCAAAAAATGTTGTGCGAAATTTTGGAACGCGACGAATTGCAAATCCGTGAAGAAATTTCAATGTGGAATGCATTTTCAACTCTCCCTCAAATTGGCACTGTTTCGGCCCGTTTCGAAGCGCTGGTGGACAAACATTTTGATGACAGGACGATTTTTTTTATAATTCCGCTGGGTTTGCATGGTGTTTGGATGGACATTCTCCTCTTTTGACCGTCCTCAACTCGGCCTCAAATTGGCACTGTTTCGGCCCGTTTCGAAGCGCTGGTGGACAAACATTTCAACGGCTGAAGGCCTGGTTTTTTGCAACACTTTGGATGGGCATTTCTGACCATCTTCAACTCGGCCCAAATTGGCATTGCTTTCGCCCCGTTTCAATGCTCTGGTGGACAAACATTTCAATGGCAAAGCGGATTGCTGGCAAGTTTCAATTTTTCTCAAAGTAACCGGTCAAATGTTTAATAAGCTTTAAAATTGTGATTGCATTCGGCAGTTCAAAAATTGAAAAAAGGAAAAAATTTTCTTTGTTGAAAAAACTTATTTTAAAAAATTTATACTTCAACCATATGAAATAACCGGT
>Hetgly06036.t1 gene=Hg14
CGGATGGGGCAAAAATGAAAGTGAAGAAATTGTGATAATAAAAATTGAACAAAACGACCAAAAGGAGCAAAATGAAACTACGGGCATTGATCAAATTGGTGGAGAAAATGGAACGGACCCAAATGATCAACAAAAAAGACAAATAATTTTGAAATTTGAAGCAATTATTGAAAAAATAAAAGAAAAAGGAAAATATCAAAGAAAAGACCAAAGCAAAATGGAGAAAAAAATTGCAAAATTATTAGGAACAAATCGGCAATTAATACAAAAATGGAAAAATGAATTAAATTTAAATAAAAAGAAAATGAAAAAACAATTATATGATGAGAAAAAGAGAGAATTCACTGAACGATTTGATGAATTTAAAGAATTATATGGCCAAGGCAAACAGAAAGAATTTGCGAAGGAATTGGGCATTTCTAAACAAACATTTTGGAAATGGAAAAAAGAATTGTTGCCAAAATATTATAAAACTCAACATACGAATGATGACAAATTGAAAAAGATAAAGCAATATTTAGAAATAAAAGAACGAAATCCGAAAATGAGCGACGAAATAATTGCAAAGAAATTTGGAGTTTCACGAGAAACACTAAGAAGATGGAAAAAGAAATTTGCTTCCACTTGAACAATGATTTTAATTTATCAATGATTTTTAAGGGTTTATATAAAAGCATTGTTGAACAAATTTTATATTCATCATAAAAATTTATTTTGTTGGAACTTTGAAAAAAGCATAATTTATTTACCAAAATAAATAAAATTGTATTGAAAAGGGATTCGAAAGTATAATATAAAAAAAATTCTCAGAAATACATTGATATATTTCTTATTGTTGGAATGCAGTCAAATAATTCAACACAAATATGATCCCACTTAAAAAGAATAATTATATGAAATATTCTTTTGAATTTTTATAGAGAATTTTATTGATGCGCAAGTAAACTTTTGTTTTTTTGACGCACATATGTATATTATTTTTATATTATTTATATGAATTTCCAAGATCCGCCTTCATATTGATTTAATGATTTTTTTACGTTTATTAATCCCTCGAATAAAAATATGATATGTATAATTTATATATATATATTTACAAAATATGAAAATATTTAAAATAACAATTTTATTTTTTATCATCACTTTTGATGAAATTGTTTTAATTACCTGTGGTAATACGTCAAAACGGAGCCAACTAAAAAGTTAAAACAAAATAATTTAATTGCTTAAATTAAACTAAATTATTTTTCAAAATCAGATTTAAAACCGCCCTCAATAAATCCGGCCACTGGTGTGCTAGAGTACCGTATTGATATCTATGAACATGGACAATTACAGTCGCCATCTAATCATGGTACAGTCAATAAAAAATTTCAACTTAATATTTTTGGGGATTTCATAGCAATGACATTTTTTTGCGGGTATAAGAAACGCCCTGGCGGAATTTAAGAAACGACCTAGCACCATATATAAACCAT
>Hetgly06037.t1 gene=Hetgly06037
ATGCGACAACAATTTGTTCTCCAGCGACTTGGGCGCCAAATTACACCACCAGTCGAGTTGCCGGCAGCAAAACGACGGAAAACAACGGCACAACAACAGGACTGTTCCGATCAACATCTGCATTGGTCTCAGACCAAATTGTTCAACGAAAATTGGCAATTGTACAAACAATTGTACGACAACCGCACCACCGAATATGAAGACATCGAACCAACAAATCTGCGGCGGCGTTGTCCAACATGTCAACAGACATTCCGTTTTGTCTTGGCACGCTTCTCTTCAGTCCGGTTTCAAACTCCTTGGTTGCCGCGGATGCAGAAACATCAGTCCCGAAAAGCCGGCTGGATTTTGTTGGATGTGTCTTTCTTGCGGAAAGAAGCATTGTATAGTTTAAACAATGCATGGCACAACTTTTTGAAGGCGGGTGAGAAAATGGATGGTGGTGATGAAAATGAGGAGGAGGAAGAGAGTGATGAGGAAGAGAGTGAGGAAGAAGAGAGAGAGGAAGACGAGAGTGAGGAAGAGAGAGAGGAAGAAGACGAGAGAGAGGAAGAAGAGAGTGAGGAAGAGAGAGGAAGAAGAGGAGAGAGAGGAAGAACAGATGAGGAAGAGAGAGAGGAAGAAGACGAGAGAGAGGAAGAAGAGAGAGAGGCGAATGATGATGAAGTGGTTGAAGAGAGTGAGGTAGAGGACGTGGATGTGGATGTAGATGGATTAGGGCTGAATGACGAAGTGGTTGAAGAGTGTGAGGGTGAGGACGCAGATCAGAAAATGGGGACGGGAGAGGAAATGGAGGAGGAGGAAACGCACGAGGAGGAAGCGGAGGAGGAGGGGGAGGAAGTGGAGGAGGAACTGGTGGGGGACGAGACGGTGGAGGAGGAGGGGGAGGAAGCAGTGGAGGGCAAAACGGAGGAGGAGAAAGCGGAGGAGGAGGAAGCGGAGAAGGAGGGGGAGGAGGAAGCGGAAGCGGAGGGGGAGGAAGCGGAGGAGGAAATGATGGAAGCGGAGGAGGAAATGATGGAAGCGGAGGAGGAGGGGGAGGAAGCGGAGGAAATGATGGAAGCGGAGGAGGAAATGATGGAAGCGGAGGAAGAGGGGGAGGAGGAAGCGGAAGCGGAGGGGGAGGAAGCGGAGGAGGAACTGGAGGAGGGGGAGGAAGCAGTGGAGGGCAAAACGGAGGAGGAGAAAGCGGAGGAGGAGGAAGCGGAGGAGGAGGGGGAGGAGGAAGCGGAAGCGGAGGGGGAGGAAGCGGAGGAGGAAATGATGGAAGCGGAGGAGGAAATGATGGAAGCGGAGGAGGAGGGGGAGGAAGCGGAGGAGGAAATGATGGAAGCGGAGGAAGAGGGGGAGGAGGAAATTATGGAAGCGAAGGAGGAGGAAACGGAGAGAGTGGAGGAGGAAGTGGCGGGAGCGGAGGAGGACGAAACGGAGAGAGTGACGGGAATGGAGGAGGAGGAGGAGGAGGAGGAGGAAAAGAACGAGCAGTGTTCAACGAAGAAGCGGCTGTTGGGGATTTTTTTCTTTATGGAATCGGCAATACGAAATCAGCAAGCCGATTTCGGCCTGCCGATTTCGGCTTGCCGACTTCGGCTTGCCGACTTCGGCTTGCCGACTTCGGCTTGCCGACTTCGGCTTGCCGTACGAAATCGGCTTGCTGATTTCGTATTGCCGATTCCATAA
>Hetgly06038.t1 gene=Hetgly06038
ATTATTTTTCAATTTCATTTCAAAAAAATTTTTCCTTATGGAATCGGCAATACGAAATCAGCAAGCCGATTTCGTACGGCAAGCCGAAGTCGGCAAGCCGAAGTCGGCAAGCCGAAGTCGGCAAGCCGAAGTCGGCAAGCCGAAATCGGCAGGCCGAAATCGGCTTGCTGATTTCCCGCTTCTTCGTTGAACACTGCTCGTTCTTTTCCTCCTCCTCCTCCTCCTCCTCCTCCATTCCCGTCACTCTCTCCGTTTCGTCCTCCTCCGCTCCCGCCACTTCCTCCTCCTCCTACCGCTCCATTCCCACCACTCTCTCCGTTTCCTCCTCCTTCGCTTCCATAATTTCCTCCTCCCCCTCTTCCTCCGCTTCCATCATTTCCTCCTCCGCTTCCTCCCCCTCCTCCTCCGCTTCCATCATTTCCTCCTCCGCTTCCATCATTTCCTCCTCCGCTTCCTCCCCCTCCGCTTCCGCTTCCTCCTCCCCCTCCTCCTCCGCTTCCTCCTCCTCCGCTTTCTCCTCCTCC
>Hetgly06039.t1 gene=Hetgly06039
ATGGGCCGAGAAACGCCCACCCTTCGGAATGTTGTGGCATCGCCGCGGGAGGAACGCCCGGCCGCCCCCAAATGCAAGCCGAATCCGGCGACGCCCATAATAAATCGTCTGCTCGCCAAGGTCAAAAGCCTGGAGGACAAAGTGGAAAATTTGGAGCGCGAGAACCGCCATCTGCACATTTTGGTTGGCATGAAAATCGAACCCAACGATGAGGAGCAAATGGACACCATGCCGATCCCGGGCCACAAATTTGTGTGCGGGCCGACGAGCTTCAGCGTGGCCTTCGAACTCGAACGAATGAAGCTGAACGATTGA
>Hetgly06040.t1 gene=Hetgly06040
ATGGCGCAACAACAGCAACGCTTCTATTGTTGTTTATGCTTGCAAGATAACGCATATCCGAAAGAGGTGCAGGTGAATTTTGGCAAGATGGTGAGCTACTTTGATGACCGCGGCACTGAGAAGCAGGTATGCGTTGACATGAGGAGGAGCTGCTTCGATGCCCACGACCCGGGCCCGCAATTCGTTTTCGTTTTTTCGCAAATGGCACTTCACTACAGTCAATGGCTTCACTCAATGGCACTTAATTTCAGCAAATGGCACTTCGCTTCAGTCAATGGCACTTCACTTCAGTCAATGGCACTTAATTTCACTCAATGGCACTTCATTTCAGCAAATGGCACTTTATCTCCGTCAATGGCACTTCAACTCACGAATGGCACTTTATCTCCGTCAATGGCACTTCAACTCAGCGAATGGCACTTTAATTCAGCGAATGGCACTTCATTTCAGCGAATGGTACTTCATTTCCTCCAATGGCACTTTATCTCCGTCAATGGCACTTCAACTCAGCGAATGGCACTTCACTCAATGTCACTTCATTTCAGCGAATGTGAATGGCACTTCATTGCACTCAATGGCACTTTATTTCAGCGAATGGCACTTTATCTCCGTCAATGGCACTTCAACTCAGCGAATGGCACTTTAATTCAGCGAATGGCACTTCATTTCAGCGAATGGTACTTCATTTCCTCCAATGGCACTTTATCTCCGTCAATGGCACTTCAACTCAGCGAATGGCACTTCATTTGCGTCAATGCCACTTCAACTCAGCGAATGGCACTTTACTTCACTCAATGTCACTTCATTTCAGCGAATGCGAATGGCACTTTATCTCCGTCAATGGCACTTCAACTCAGCGAATGGCACTTTAATTCAGCGAATGGCACTTCATTTCAGCGAATGGTACTTCATTTCCTCCAATGGCACTTTATCTCCGTCAATGGCACTTTAACTCAGCGAATGGCACTTCATTTTCGTCAATGGCACTTTATCTCCGTCAATGGCACTTCAACTCAGCGAATGGCACTTCATTTGCGTCAATGGCACTTCAACTCAGCGAATGGCACTGTACTTCACTCAATGGCACTTCATTTCCGTCAATGGCATTTTAATTCATCAAACAGTACTTCATTTCATCGAATGGCACTTCATTTCAGCGAATGGCACATCATTTCCGTCAATGGCACATTTCACTCAGCGAATGGCACTTCATTTCCGTCAATGGCACTTCAACTCAGCGAATGGCACTTTACTTCACTCAATGGCACTTCATTTCCGTCAATGGCACATCATTTCAGTGAATGGCACATCATTTCAGCAAATGGCACATCATTCCATCGGATGGCACTTCATCTCTGCAAATGGCACTTCATTTCAGTGAATAGCACATCGTTTCAGCGAATGGCACTTCATCTCAGCGAATGGCAGTTCATTGTAAGCGAATGGCACTTCATTTCAGCGAATGTCACAGCTTTTCAGCGAATGGCACATCATTTCAGCAAATGGCACATCAATTCATCGAATGACGCTTCAGTTCAGCGAATGGCACTTCTTCTCAGCGAATGGCACTTCAGTTCAGCGAATGGCACTTTATTTCTGCAAATGGCACATCCTTTCAGCGAATGGCACTTCATTTTCAGCGAATGGCACTTCATTTCAGCAAATGGCACATCATTTCATTGGATGGCACTTCATCTCAGCAAATGGCATTTCATCTTAGCGAATGGCACTTTATTTCAGCGAATGGCACTTCATCTCTTCGAATGGCACTTCATTCCAGCGAATGGCACTTCATCTCAGCAAATGGTACTTCATTTCATCGAATGGCACTTCATTTCAGCGAATGGTACATCATTTCAGCGAATGGCACTTGATCTCAGCGAATGGCACTTCATTTCAGCGAATGGCACATCATTTAACGAATGGCACTTCCTTAGCGAATGGCACTTCTTCACCGAGCACACTTCATTTTCATTCAATAACTTCAAAAATTAA
>Hetgly06041.t1 gene=Hetgly06041
ATGTCTTCAAAAAATTTTCTGATTAAAACGCCAATTGGGTACATTGCCCAAGAAGAAATTGGCGACTGGGCTGCTTTGGTATCTGAGGAGGAACAGCTGCAGGAGCAGCAGGAGCAAGCGCAGCAGGGGCAGGAGCAAGCGCAGCAGCAGCAGCAGGAGCAAGCGCAGCAGCAGGAGCAAGCGCAGGAGCAAGCGCAGCAGCAGCAGCAGGGGCAGGAGCAAGCGCAGGAGCAAGCGCAGGAGCACCAGGAGCAAGCGCAGCAGCAGCAGGGGCAGGAGCAAGCGCAGGAGCAAGCGCAGGAGCAAGCGCAGGAGCAAGCGCAGGAGCAAGCGCAGCAGCAGCAGCAGGGGCAGGAGCAAGCGCAGGAGCAAGCGCAGGAGCAGCAGGAGCAAGCGCAGCAACAGCAGCAGCAGGAACAAGCGCAGCACCAGCAACAATTGCGCCAGCAGGAGAAGCAGCGGAAAGAAAATGCCCGAAAAAAGGAAAACTTCCAAAGGAAGCAACAGCAGAAGCAGCAGCAATTGCGCCAGCAGTACCAGTCCCGGTCCCGCTCAGAGAGAGAGTGA
>Hetgly06042.t1 gene=Hetgly06042
AGAATTTTCGAAAATAAATATTTTTGAATTTTCCCTAAATCGTCCATAGATTTTGGCTAAATGGTCCACTTTCTCCGCCCAATGTTTGCTCGTTGTGTCTTCCGACCATTTTTGAAGAATTCGTTGGCACCCTCAAAAACATGCCGTAGTTTTGCTTCATTTGGTGTTGCACAACCGTCATTGAACAACAACAGCAGCAGCAACACGTTCATCGACAGAGAATTGCGTTTTGGGGCCCACAATTATAAGCCATTGCCGGTGGTGTTGACCAAGGGAAAGGGGTGCCGTGTGTGGGACGTGGACGGCAAGGAGTACTTCGACTGTTTGAGCGGTTATTCTGCGCTCAACCAAGGCCATTGTCATCCGCGACTCGTCGAGACGATGCAGCGCCAGTGCCAACAGCTCACGCTCACTTCACGCGCCTTCTTCACAGACGCGCTGGGCCATTACGAGGAGTATGTCACCAAGCTGTTCGGCTACCAACGGGTGTTGCCGATGAACACCGGCGTCGAGGCGTGTGACACGGCCATAAAATTGGCCCGTCGTTGGGCGTATGATGTCAAAATGGTGCCAAAAAATGAAGCCAAAGTTGTTTTTGCCGAAAACAATTTCCATGGCCGATCTCTGGCTGCCTGTTCTGCGTCCACTGACCCCGACTGTTACGGCGGCTTTGGCCCATTTGTGCCGAATTTTGTCAAAGTGCCATTCGACGATCTCACAGCGCTTGAGGCGGCGATTTCCGACCCCAATTGTGCCGCCTTTATGGTGGAGCCAATTCAGGGCGAAGCGGGCGTAATTGTGCCATCTCCTGGATACCTTCAATGTGTGCGGCAACTGTGCACCAAATACAACGTTTTGTTCATTGCCGACGAAGTGCAGACCGGGCTTGGTCGAACGGGAAAAATGTTGTGCTGTGAACATGACGGCGTTCGGCCGGACATTGTCACATTGGGCAAGGCCCTTTCGGGTGGGCTTTATCCGATTTCGGCGGTACTTGCGGACGACGAGGTCATGTTGACCATCCGGCCGGGCCAACACGGCTCCACTTATGGCGGAAATCCGTTGGCATGTCAAATTGCCATTGAAGCATTGAAAGTGATTGAGGATGAGAAATTGTGTGAAAATGCCGAGAAAATGGGCACAATTCTAATGGACGAGTTGCAGAAATTGCCAAAACAGAAAGTGAAGAGTGCGCGAGGGAAGGGACTTTTGTGTGCCATCGAATTGGACAACGGCATTGACGCTTGGCAAATGTGCCTTCGTCTAATGGACAACGGAGTATTGGCAAAACAAACGCACGAACACACAATTCGATTTGCTCCGCCATTGGTAATTAATGAAAAGGACACACGAACAGTGGCCAAAATCATCGGACGGACATTAAATGCATTCGATTGATTGTGAAAATTGTGACACTAATACATATCCACCAGGGATGTGCCGAGCCAGACAAAATCCGATTCCGATTAAATCGCCGATTCCGATTATGGCCAAAAATCCGATTAATTGCGATTCCGATTCGGCACGTCCCTGATATCATCCACTCACTACAAAAGTAAACTGTATTGCCATGAAAGTACTATATATGTTTTTAACAGGAAAAAAGAGAAAAATTTAACATG
>Hetgly06043.t1 gene=Hetgly06043
ATGACTTTCTTCGTCCCACAACCATCATCTGTTATTCTCTTTGTGGCTGCGCTCGCCGCCATTTCCGCTGATGTCTTCAATGTAAATGACTTCAACATGCAACAATACTTCTGCGCCCGTTCTCTGAACAGCCGAATAAAGTTTGCCGGATGCGAAAATGGAGCAGCAACAACGACGCCCGAACCAACTGAACAGAAAGCCCCGGTCAATTGGTGGTAA
>Hetgly06044.t1 gene=Hetgly06044
ATGGCCGAAACCGAGCGAGCCGGACGAGAAACTGCCGACTTGACGGCACAGTTCCCGACGATTGCGAACAATTTGAAGGCATTGCAGCATGCTCATCCTCCAAATTTTGCGGCTGATTTCCGAGGCACAATGATCGATGAAATATTGGGCACTTCCCCTCTCCATCCGTTGTCATTTCGTGCAAATGAACTGTTGAACTCAACACCGCCGACCTTTCAATTGCTCAAGAAACGCTCCATAAACAATAACGAGCAACAAAATCAAATTGAATGCAAATCATTCTCCGCCGCCCAAGGAAATGCCCAGAGAAGTTGGACAATCTACAAAACATTGGCAAACCGGCGAATGGCACTGATCAGAAGGCGCATTGGCGAAGGAATAGGGGAAACAATTCCATTACATAACAACTTAAACATTTTCTGCAACAATTTAGCCAATGCGAAAGTATGCACCAAAAAGTGA
>Hetgly06045.t1 gene=Hetgly06045
AAAAAGCATTGAAGTCACGAAACCCCCAAAAAAGACAAAAAAGGCACAATAAACCCAACCTAGAAGCTTCAAACAAACTAGAAAATGTGTTTTAAAGTGAGACATGAATTTTAAAAAATGCCGGAACAGGAAACAAGATTTCTCGTGCTGGACATGAAACAAATGGAGGAGGGTCCTTTTTTATTGGATTCACGTTCTTGCAATTTTGCAAACAATAACAGGACCAGTGTATATTTTAACCTTCTATAAGGCGTTACCGAGACGGCTCCCGGTCACCAGAAAATTGGAC
>Hetgly06046.t1 gene=Hetgly06046
AACAAAGATGGCTCTGCGATCAACAAATATCGGGTGCACCCATTTGTTACGGAATCGTACCGAAAAATCATGGAATCCGGCGATTTTGAGCAATTGATCATGGAACAGGGATGGTTGGACTCGGCTGACCAATGGAACTCCACAATCCTTGCCCATTGGGCTGACCAAAGTTTGGCTGAACTGCTCGACAAAAGCTTTTCAAGGCCTATGGTAAAATTTTGCCTCGTCTCCCGGAGGGCACTGTGTGGCGGCTTGGTGATGGGCAAATACGGCCTGTACAATCCGCAGCCAAAAATGATGGCCTTTGCCATGATGTTGTACGGGACCAAGGAGAAGCCGTTGTGGCCCTACACGCTGTTCATGAAGAAGAGTGACGGAGCATAAAGAAGCTCTCTCAAGGACACATTGTTTTTGTGTGTTTGTGTTAGGTGTAAACAAATATTTCTTGTTCTATGGACGAGAAATGTTAGTTTGGATGTTTATGTTCCATGGATAAATAAA
>Hetgly06047.t1 gene=Hetgly06047
GCCTCGTCAGCCCCGTCCAAATTTTGAGAACGGTTCAATGCAAAACCCAACTTGTATTTTACAGAATAGAGCCTAAGGCTTAGGCCTAAAGCCTATGCATAACCTAAGAAATTATAAGAGTTGTCTTTTAATGAGTTGGCATGACATCATTTGGCAAAAAATTTTTTTTCCAATATTTCAAAATTTTATTCTAAAGGATAAACCCATAATTAGTGAGGAATAAACCATCTTTCTTGGTCTTTTAACCCTTAAAGCCTTTAGCAGTACTGTATACTGTACTGTATCATTACCACAAATATTTT
>Hetgly06048.t1 gene=Hetgly06048
ATGGCGGACGACAGCGCATCAATGCCATGGCAAAACCATCATTATCATCATCATTATTATTCGCCATCGTCGAAATGTTCGCGTGAATTTACGGACCCTAATTGCGAAGGATTGTACGACTTTGTGTTCCGAAATCGGGCAATCTCGGCACCTTCATTGAAAATTGCCTATTTGTCAATGCTCACTTCGCTGTGCAAAAGTGCCGAATCGGCGGACGCATTCTTTAATTTTTTCAAATAA
>Hetgly06049.t1 gene=Hg20
GCCAGTCAGCGAACCATGTTGGTGCGACATATGCCCCAAGGGGCCTGTCAGCGAACCACATTGGTGCGACATATGCCCCGAAGGGCCTGTCGGCGAACCGCATTGGTGCGACAATGCCCCGAAGGGACTGTCAGCGAACCACATTGGTGCGACAATGCCCCGAAGGGACTGTCAGCGAACCACATTGGTGCGACAAATGCCCCGAAGGGCCTGTCAGCGAACCACATTGGTGCGACAATGCCCCGAAGGGACTGTCAGCGAACCACATTGGTGCGACAATGCCCCGAAGGGACTGGGCAGGGAACTCCGAACAACAGACGCGTTGCTGATGAACAGAGGACAATCCCACCCAGACCGATATGTGTGCCCTGGTCGCAAAGCAGACCGGCACTGTGTCATGGTCGCAAAGCAGACCGACACGGTTGGCTATGGTCGCAAAGCAGACCAGCCTCGCCATGGTCGCAAAGCAGACCGGCGTGTGCACTACATATCATGGTCGCTAAGCTGACCGATATGTTGCCATGGTCGCAAAGCAGACCGGCACGTGCACAAATCTCATCATGGTCGCAAAGCAGACCGATAAGAT
>Hetgly06050.t1 gene=Hg22
CTCTGGTGGACAAATATTTCGACGGCAAAAGTGAATTGCGAATTTACCAATTCGCACATGAGCAACGACGTTTGGATGGAAATTTTCCTTTTTTTGACCATGCTCAACTCGGCCTCAAATTGGCACTGCTTTCGCCCGTTTCGATGTTTTAGTGGACAAATATTTTGATGACAAAAGCAAAATGACTGTGGGCCACAAATCGAAAGGACTAACTTAAATGCGTTGATGTTCAGCGATGTTTGGATGGGCATTTTCCCACTTTTTGACCGTCCTCAACTCGGCCTCAAATTGGCACTGATTTCGCCCCGTTTCGATGTTTTAGTGGACAAACATTTCGATGGGCAAACGCGAATTTTTTCAAATTTCGCTGGGTTTGCAATGATGTTTGGATGGAAATTTTGCCCTGTTTTGACCATGCTCAACTCGGCCTCAAATCGGGCACTGTTTTTGCCCCGTTTTGATTTGCTGGTGGACAAACATTTCAATGCACGTGCGCAATGACGTTTGGATGGACATTTTCCCTTTTTTGGCCATGCTCAACTCGGCCTCAAATTCGCACTGATTTCGCTTCGTTTCAATGCGTTGGTGGACAAACATTTTCAATGGCAAAAGCGGATGCTGCGCAAGTTTTAATTTTTTTCAAATTAACCGGTCAAATGTTTTATAAGCTCTAAAAATTTTTGATTGCATTCGGCAATTAAT
>Hetgly06051.t1 gene=Hg23
ATGGACACCGCTGAAAGGTCGGCACGAGCAGGCGGGATCGCCATTCTCCGTTCCCGACGAAAAAAAGAAGAAGAAGAAACGGAGTGCGTCGACGTCGGTTCCATCGTTTTGTGCGCCTCCTATTTGGACATTCCGCCGGAGCCGATCAGCAGCAGCAGTGACGAGAAAAGCAACGGGAAAAGAAAGAAGCAAAAGGGACAGACGAAAAAAGAAGGGCCCAAAATTGTGACGGATGTCCACGAATTTGGGTGCATTCCATGGCGACTTTCGCTTGTGCACCAGCTTCGCAAGGACGACAACGGAGGCTATTCCAAACACATTCTCAAGTTGGCACTGCACTCGGACTATCGTAAGGACGTCGCATGGCGTGCCGATGTGTCCGGCACTTTGACGATGAAAAAATGGGTGGACAAAATGCCGGAGGGCACCGACCCGAGGAAATTGGACGAACATTCGATTGGGGAACAGAAGTTCTACGCGAACAAAGAGTATTTGTCCATGTACTCCCCGATCTTCGCCACAATGTTCACCTCGCAAGGCTTTGTCGAATCTGAGCAGCAGGAGGCCCGGCTGGAGAATGTGTCGCCGGCGGCATTTGCCGAATTTCTGCAGCTGATTTTTGATCCGTTGCGGAAGCCGGAGGGCAATTGTGGGCACATATTTTTTCTGGCTTCTCCATGCTCTAAATACGACGTTCGGTGGCCGCGCACGGCACTGGTCAACCCACTTTTTTTTTACTTTTTATATAAAAAGATGCTCTTTTAG
>Hetgly06052.t1 gene=Hg25
TGCGTGGACATGGAGCTGTTCAAGCACTGCGGAGGGCGACGCGTTGGATCAGTTGGGGCTGCGTCACTACTGCTGCCTTTGGATGTTGTTGTCGCACGTGGACCTGATCGAAAAGCTGCCCAGCAAGCGCACTTTGGATGGACATTCTCCCCTTTTGACCGTCCTCAACTCGGCCTCAAATTGGCATTGCTTTCGCCCCGTTTCAATGCTCCAGTGGACAAACATTTCAACGGCTGAAGGCCTGGTTTTTTGCAACACTTTGTATGGGCATTTCTGACCATCTTCAACTCGGCCCAAATTGGCATTGCTTTCGCCCCGTTTCAATGCTCTGGTGGACAAACATTTCAATGGCAAACCGGATTGCT
>Hetgly06053.t1 gene=Hetgly06053
GTGTGATAGACACGGTGTGCGTGAGGTCCTCCATATTTTTTTTGGAACTCTCTACATTCCTGACCAATCATTTTCCCCAATATATTTTTCTTATCAATAAGGTAGTGCAAACGGCGTAATTTGTCTTCATATATGCGACAAATTAAATCAGGCCGGTCAACTGTTCTCTGACTATTGTGAAGAAAATTGCGCGAAATTTCAGGCCAACGCGGATTCGTTGTAAAAGTAAGAAAGAAGGACGCATTTCCTGGTTTTTTAAATCTTGACATGATAGTAGTCGCATCATAGAATTTATGTTGGAAATATGCCCTTGTCC
>Hetgly06054.t1 gene=Hetgly06054
GGGAGCTTCGCGCCCGTTTTTTAATTTTGTTGGGAACATTCGGCCGCTTCGCGGCCTCAGGACGGGCGCTTCGCGCCCGTTTTTTAATTTTGTTGGGAACATTCGGCCGCTTCGCGGCCTCAGGACGGGCGCTTCGCGCCCGTTTTCTAATTTTTTTGGGGACATTCGACCGCTTCGCGGCCTCAGGACGGGCGCTTCGCGCCCGTTT
>Hetgly06055.t1 gene=Hetgly06055
ATGGCAAAAAATTTTAAAGAAAATTCAGTCGAATTTCGGTTTTTTGGCATTACAATTGCGGCCCAATTGCGACAACAGCAGCAACAAGCACAACAACAACAGCAACATCAGCAAAATGCGCAACTGACATCGAATACCATGCAACAATTGTTGCTGCAACAGCACCAACAGAATTTGGCTGCTGCGCTGGCCCAACAACAACAACAGCAGCAACAAGTACAACAACAACACAATGCCAACGAGCTCTTGCGCCAACATCAGCAACAATTACTACAGCAACAATTACAGCACCAGCAAAAACAACAGCATCAACAAATTGCCAATTCAAATGCCGCAAGCAATGCCAACACCAACGGCACGTCAATGTCTGGTACGCCGACCACAAACTCAACCCCGAACCATGTTGTACAAAACGGGGGAAATGGCGGGGCTGGTGCCATCAACGGAACAACTTCAAACACTGGCGGAAATGGGGGAAGCAACAATAACATTAACGGCAATGGCACAGCAAATGAGCGTTTTCGTAGCTCCGCCAACAGTACGCCGCAGTCCAACGGTGGCACAAATGGAGGCCGTGGCAGTGTCAACGAGCATCAGTTGGCCAATTCGGCATCCCCGAAATCATCAACTGCCGTGCCGGTGGACCCCGCACCACGGAAACAGTCCCATGCTTCCATCGTGAATCCTATAAATGTTGAATACGGTGAAATGAAGCAGCGTGTGATGGCCGCAATACGCTCGCCGGACCCAATGAATGATGAGCTGCAGAAGCGGATGGTCGAAATAGTCGCCAACATTAACACGGTGTCCATGGCAGCAACCGCAGCAGTGGGCGGAGGAGGGGGAGATGGTCTGTCTCCATGCTTCGCTCGTGAATGCGTTGAGAATTTGCGCCAGTTCAGTGCCCACCGTTTGCCAACCCAATTTGACTGTGCCCAATTGTGA
>Hetgly06056.t1 gene=Hetgly06056
ATGACTTCAAGTATTATGGATAAAGTTAATGCCGTCGCCCGTGACATTGAGCAACAGTTGAACATGTCACCGGCAAATTCAAGCGCTGTTTCCCAAAACTCCGATAGCCCTAGCATCGTTGCCCAAATAAATGAGGCAATTCACGAAGGGACTTCGATTAGAGCCCAATTAATTGAAAACCCTGGCCTTAAGCGTGTCAATGAGCCCAACTTCAATAATCCTAATAAGAGGAAGCGACCTGGGAAAAATTTTCGCAATTCAAACAAAAATGTTCCGTTCAATCCGCCACCATGGGGCCCGCCCAACAAATTGCCCCGAGTTAACTTGTGTCCGGTGGGAACCAATTTGGTGCGTAATGATAATGGTCCTGCTCAATAA
>Hetgly06057.t1 gene=Hetgly06057
ATGGAGACCAAGCGCAACAACTACAACAAATTCGAATCGTTGTGGAGCACTTTGTGGGACCTCGGCTACCAAACCTCGCAGTGCTTTGCCTACTCCATCGGCGTGCCAAACTTCTCATTTGTCATCGTCATTTTCAATAGGCCCTTCTGTCCTACCACAATACAAATACTTTCGGTTGGACGGCTCCACTCACATCGACCAGTGACAAGTGATAATTCGGTCTGTCTCCATTCTTCGCTCGTGAATGCGTTGAGAATTTGCGCCAGTTCAGTGCCCACCGTTTGCCAACCCAATTTGACTGTGCCCAATTGTGACAAACAACGTTAG
>Hetgly06058.t1 gene=Hetgly06058
ATGACTTCAAGTATTATGGATAAAGTTAATGCCGTCGCCCGTGACATTGAGCAACAGTTGAACATGTCACCGGCAAATTCAAGCGCTGTTTCCCAAAACTCCGATAGCCCTAGCATCGTTGCCCAAATAAATGAGGCAATTCACGAAGGGACTTCGATTAGAGCCCAATTAATTGAAAACCCTGGCCTTAAGGAAGCGACCTGGGAAAAATTTTCGCAATTCAAACAAAAATGTTCCGTTCAATCCGCCACCATGGGGCCCGCCCAACAAATTGCCCCGAGTTAA
>Hetgly06059.t1 gene=Hg33
ATGCCACGCCAAATTTTTTTCAGGATAATCAGTGGGTACGGCTTGAAGGGGAATAAGGACGCCGCCACAGTCAAAATCAATGGAAAGGTCTACACGCTGACGAAAAATGGAATTGCGCTTCCTAAGCCACTGGGGGTCCGCCGTAAGAAAGCTGTTGCACAAAAGGACAGAGTGGTAGTTCCGCCAAAAGTAAAGCCGGCTTCAAAGGAAGAACTGCGGCGTGCGTTGCTCGACAAGGAATCTGAGATCGAAAGACTTCATTTGCGTTTACTTGAAGCAGGGGGTCCGACTCGCCCAGTTGGTACGGGTGGCGACGCACCAACACCAATTGCTGCTGTGGGTACGCCTTTGAATGCGTCGGATGCTGGGACTCGCCCAGTTGGTACGGGTAGCGACGCATTAGCACCAACACCAATTGCTGCTGTGGGTCCGGTTTTGAATGCGTCCGATGCTGGGACTCGCCCAGTTGGTACGGGTGGCGACGCATTAGCACCAACACCAATTGCTGCTGTGGTGCGTCGGCTGTTGGGACTTCCCCAGTTGGTACGGGTGACAACGCAACAGCACCAATTAGCGAACCTACTGTGGGAAATGCATTATACAGTGGCTCCGATGGCTGAACTGATGCCATACTCCTCCAAAGACCCTCAATCCTTAGAAGACATGTACCGTCATCGCCTTCGAGCAAAAGATCGTCCAGACAATTTGGTGGTCCGATGGTGGCACAAAGAAATTATTGCAGCGAAAATCGTCACTGTTGTGCACTCAGCCGGCCACTATGTTGCGGCTTTAGCTCACCTGACTCGCGCTGTGGGTACGCCGCTGTGCACTGTACACATGTACGACAGCTTGCGTAAGCAAAGCGTTTCCGAGACTATCGACAAAGGACATCGACACTGGCAGAACTACGCTGTGCCCTTTTTGAAATACTTGGGAGTTTTGCGTCAAAGTGGGTACGACAAGGATGTGACCCTCACGGTTTTGCTTCAACCATGCCCAAACCAACGCAACCACTGCGATTGCGGTGTGTTTGCCGTGGCATGTGTAGAGGAACTGTTGATGGACAGAAAACTTCAAGTGGGTCCGGTCCAGGCCTGGGGCTATGGACAACAACACATGCCGTTTTATCGCCGTTGGATCCATCAGACACTGAGCACGACAATGAAGAAGGCACCAAAAGATGATGACTCTGACATGGACGACATCACTGTTATGGAGGGTTCGGCTTCGGAAACGGACGAACAAGAAGAAGGATCGGGGTCGAAAACGCACACAACAGAACTGAGTTCACATATAAATGCACCAAAGTAG
>Hetgly06060.t1 gene=Hg34
CAGGGAGTACCTGACGCTGAACCCAATAAGCTCTAGGCCCTTTCATTTTAAGGCAGGTGGTTTTCACATACAATAGCAGACAAATCCGTTGGTTCAGATCCACCCAATCACCAGCTATGTAGACCTTAGCAAGGTGTTTGTGTGCACAGAGTTCAAGCTCAAAAAAGTGGCAGATGATGGGGTTGTGGTTGATGTGCCGGCAAACGCAGCGGTCGGCCTTATCCAAATGCCCGGCGCAACGTTCATCCGGAACCTGAAAGTGCACATCAACCAGCGGGAGGTGTACGACTCAAACCAGCTGTACAGCTACAAGGTGTTCCTGGACACTGAGCTCAGCTACCCTGTAACGGCAAAGGATTCATACTTTGGCGTGGCAGGCTATTTCCGTGACAGTGACCCGACCAAAGTAAACGATCGAAGGAAAAAGGCGGTGGAGGAGAGCAAGGGCTTTCAAGCGATAAGCAAGCTGAACGCCGACATATTCAACCAGGACTTGTACATGATCAGCAATGTTGAGATTGACATTGAGCTCGCCCTGCAGTCGGACGATTTTATGATACATCAGGAAGCCGCAAATAGGGACAAGTACACGCTTGAGATTGTCGACTGCAGGCTGATAGTGAAGACGGTTGATCTGATGGACGGACTCAGCCTAGACATTGCAAAGAAGTTGGACCTGGAGCCCGCCAGATACGGCATCCGGAAAACGCTGATGAAGTCGCTGTTCATTACCGGTGGACGATACGATTTTTCTGCCAATCTGTTCACCGAGGCAGTGCCACGGAGGGTCATCATTGGGCTGGTGCCCAACCAAAATTACATTGGGCACAATCAGAAGAACCCCTTTTACTTCAACCACCACAACGTAAGTGCCGCTTTGACATGTATTTCTGGCAGAAAAAATGTTCAGGTGCGGGATATTGAACTGACCGCCTCTGGCAGGACATACCCACAGTTTCCGTACAACTTGGACTACAAGAACAACAGGTACGCAAGGGCGTACCATGACACCCAGGAGCACCTTGGCATGGCCTGTACAACTGAGAGCAACGGGATCAGCTACAGCATGTTCAAGACTGCCTACTGCCTCTATGTCTTCCAAATGACCAATGCGCAGGAGGACTCGCCGGGCTTTGAGCTGATCAAGGAGGGCTGTACAGCGGTGAACATTCGGTTTGCCGAAGCGGTTCCGAACGAGGGGGTCACTTTAATAGCCTATGCCGAGGCTGACGGGCTCATTCTGATTGACCGGAACAGATCAATCACTAGTGACCTTACAGTATGAATGGTGAGAATTATTCCTCCGATTTTGTTCAAATGCCCTCCTCCAATGCCGCACACGAAGGGATTGTACTGTGTTTTCCGGATGTGATCGAGAAGTCGCCAATCAACTTTTTTCTCTGCCTCATCTACCTGTTTGGTGCAGCAGGTACTGCGGCTGCGGGATTTTACCTGTTTTTGAGGGAGAGGCGGATTCGTCGCAGGAATGGACAATCGGTTCATCGACAGAGCTCTCTTTGAGAACCGGGCGACGAGAAAATATTTTGTTGGCACTTTTCCGGCCGACCGATTGCCAAAGTGCACGAAATTTCCCTGCAGTCTAATTGTCAATTTGGACCCGTCGGGAATGCCGGGAACCCATTGGTGCGCAATATGGGCGCGTTCGCCGGGGGTGGCCTACTTTTTTGACTCCTATGGCGAGATGCCAAACGATCTGATCAAAAAATATTTGGCAAATAATTTTCGGAAAATTTATTTTAATCGAAAAAAATTTCAATCGATTTTCTCTAATGTTTGTGGTCATTATGTTTTAGTTTTTATTTATTTTATGTCCTTAGGATTTGATTTTGAGTTTATTATGCAATTTTTGAAAAGGCCAA
>Hetgly06061.t1 gene=Hetgly06061
ATCAATAATTACGTGTTTTTTTTCGCAGGTTCATTTTATGCTTTTAACAATTATAATCATAAACTATTTCTTAATCGTAATGGCCCCGAGAAAAATCAATGATCAATTGGTGTTTGAGAACAAAAAAATGGATGAGTCGAAACGGGAAAATTTTTCCCCTCAAAATGATGATGACGTCATCACAATTGGAGACAACAACAACACTCAAACACTGCTTGACCTGCAACCGGGGCCCTCAAAAAGGGGACGCAAGCCTCGCTTGGACAAAATCCATGAGGAAATTGCTTCCGCAATGAAGAAAGCAAAAGCCATGGAAGCTGAAGTGGATGAATCGCCCAAAAAACAACCGACCAATGTGTTTGAGTACCCGACCATATTTTGGAAATTGGCCCGCCCAAAGTACGGAGTGTTCACGTTCATGTGCAAAGAGTGTCGTGATGACAATTTCCG
>Hetgly06062.t1 gene=Hetgly06062
ATGTTCCGCATCTCCGACATCGTCGCCTACAGCAGCAGCTGCTGCTGTTGGCGAAAGACGTACAGGGACCCGCCACGTGAAGCCGCACGGAGGCAAAAACAGCGAAAAACCTTGGTCAAATCGAATTCCATCAGCGACAACGTTTCTCAACAATATATTACCTTCAGAATCAATAGGCTTGTTTGGTGCATAAACGCGAATCGCATCAGAATTGGTGGCGCGTGA
>Hetgly06063.t1 gene=Hetgly06063
ATGACAGCGGAATTTTGGGTGACAAAAAATGTGACTTCTGCTCAGCTTTGTTGTTTAACAGTAAGCTTGCCTGAAATCACGGAACCACCCGCCGAGTTGCTAGAACTTGCAACTGACATCACACCAGAAGCAAAGGAATACCGTCAGCATCAAAATACATATAACACACTTTTGGCATTTGCCTCTGTCTCTGTTGGTCACCAAGAAAATACAACAGATGGTTCTGTCTGCTTCATGCTAAACGGTGAATTTGTGCGCCGTATCAGCTCACTTTTTTCTGGAAACTCGACTCCCAGTTTTACACAACTTTTTATTTTGGACCCAGAAGCAGCTTTGGAACAACGAATGCAGAACACTCGCTATGGGGGAGACCGTGTCAATCAGCAAGGATTACGCCAAATGATGTACGCGATTCAACATTACATTCAAGACAGACGAATTTACCAACAGAAGGAACAATGTTTTCAGTGTGGACTGAATCAGAGCGACCACCAGTTCAACACGGAATTTGGATCACCACAGCAGAGGAATTTGAAAGTGAAGGCAACAAAACAATCGCGAAGACAAGCTTTGACGGACGAAGTTGACTCTGGAGACAATGAAGATGACTTTTCGGACGTTGAAAGCCAAATGGATGTTTCAGAATATGAAACAATGTCAAACAATGAAAGTAACCAATCAAATGTTTCTCATGACGAGCCCTACGATGAAGATGATGCCGAAAACAACAAGCCGATGACACTCCGTGATTATGCGGCACAACAGTCCATTCAGCGTTTCGATTCGGCATAA
>Hetgly06064.t1 gene=Hetgly06064
ATTGCTTTTATTATATGGAATCCGTTTCATCTTCTTTAAAGTCAACCGAGGGCCAGACCCAGCAGCAGCGGAAGGAAATTGCAAATTCTTCAGTAAGACCAACCGAGGGCCAGCAATCGGTCCGTTACTTTCGTCGAATTCGCATTTGTTCAACTTCCTCGGATTCATCGGATGAGATTTTTAATTCTTTTGAACGTCATGACAACTCAGTGATTAATGTTAAGAACACTAAGCAATTGAACATGATCAAATCTCCCGAGTCTTCTGATGCATTGTCTGGCGGGCCTCACAAAATTGATGGAGCGACAGTTGATGTAAAACAGTATATGGTGAAGCAAAAGAAAGAGAAATTGGTTAACAAACGCATTCGTCAATCCCCTCGAAAACGTGTGAAGGCGACCGGTGTTACTGAAAAAGGCTATTCAAATAAGAAGAAAGATGAAAACTTGCATTTGCATTCTGGGCCGTCAGTGAAACCTTTGAAACTGCAAAGCACAAACATACCCACTTCCACATCAGTTACACTTATGTCGCCAATCATGGTTCCATCAACAAATCCAATTCAACAAGTGTTGCCGTTTTCGATGTCGTTCCCTATTATCTCGCCTTTTGCAATGCCGATTAATTATTCCATGCCTATTACGATGCCCATGCTCATGCATATGAATATGTACCCTGGATCTCATTGCTTTTATTTCATGGAATACAATTCATCTTCTTCAAAGTTAACCGAGGGCCAGACCCAGCAGCAGCGGAAGGAAATTGCAAATTCTTCAGTAAAACCAACCGAGGGCCTTATATCTGTGCTCGAAGGACAACTTAGCAAAAAATCTACTTCATTCACTTCTAACAAGGGTGCAAATAATGAAAACAATTTCCAACTCATTGAAAAGTTCACAGACGAACAAGCTGTGCATCTTATTGTTCATCGAATGGTTGCGCAGATGTCAACAGCATAA
>Hetgly06065.t1 gene=Hetgly06065
CATCCACAATTCGCCAATTACCAAAACGAGCAATACTCGGCTCGAGATGCTCGGATGTATCGGCAAGAGACAAATTCGAATTTTGTGACCCCATTAAACCTGCAATTCTCCGAAAATGAAAACCGACACAATTATACCCAATTTCAAAATCCAAGAAATTTCCAACAAAATCCCGAAATGGTTTATGCACAGATAAATCCCCCCGTTTACCAAACTCAAGCATTTCCAGCCCAAACCATTCCCATCCCGGACATTATTATGGAATTACACAAAGTCACACTTTCCAACCAATACGCAAACACAATGAGAGAAATCCCTACCCTTAATGGAACGGAAGGGAGTGACAAAGTCCAGGATTTTTTTTTAACTGTTGAAATGTGTGTTGGAGAGTGGCGCCACGAAAAGAAGTTGGAAATGTTGAAAACTAAGCTGAAAGGAAAAGCTCTGAGGGCACTTAACATGGCACTGAGTAAATTTGGAAATACCGCGCCATTCGAGACGATAAAAACGGAAATAATGTCGACATTGAGGGAGACGGATTACAAGGAAGCAAGTGCTTTTCAGGAACTTACACAGACGGGGAAACGAAAGGAGGGCGAAAGTGTTATGAAATTTGAAAAGAGAATGAATGAACATAAACTCTTGGACTACGAAACAGACAGAGAACGTGTTAAAAATGCGATAGACTTTTGTGATGACGATGAAAACAAAGTGCTGAAAAAATTCGAGATTCTGGACGAGAAGCCGAAAATTGTCCGTTCAAAATCAGCTCCGGAAACAGTCAATGTAAAAGAGCCCATCAATGAATTGGTTGTTGT
>Hetgly06066.t1 gene=Hg46
ATGCTTAGTCAAGATTTAACGGAGTTGAAGAGAAGCGGAGAGAAGACGAAGAGAATTGTTGCCTTACAAATTGGCAGCACCTCTACGGAGGAAGCTCAAAACGAGGCGAAAGGGAAGAGCAAACTGTCTGAGCAGGAACAAAAAGACAGCGCGCAAATTGAGGCGAAATTGGAACGCACATTGAGGAACGCAAATGGGAACGCAAATCAATTGCAGGCGCAAACTGATCAAAGGCCATGGGCGCTGGGGCCCATCGTGAAGTCAATGGCCATGGGCGCTGGGGCCCATCGTGAGTCAAGGGCCATGGGCGCTGGGGCCCATCGTGAAGTCAATGGCCAAGGGCGCTGGGGCCCATCATGA
>Hetgly06067.t1 gene=Hg49
ATAGTTTTTTTAAGTTTTTAGAACAGTTCATATTTTGATTTTAGCACATAAATCGAAGTTTTATAAACTTAAAATTAAATTACTTAATAATGACATCCAAAAATGATGTCACTTTTCTTCAAAAATCTCCTTCAATGAGCGATATGAAGCCCCTTCGACTTCGTAGACCAAGCATTGTCAGCACCAGCAGAAGCGGACTTGGGAATTTGGGAGTGCCATTAACTCGTCATCTATCGATTGAACCACCGGCCAATTTGGCTGATGCCTTGGGAATGCACACTCCAAATTGGGCTTTTTATCACTACAGTTCGCCCAATTATCGGTCAGCGTGGCCATGGCGAATGTTCCGTGACCGTTTCGATTGTGAACAAATCATGTACAATAAGCACTTCTCTGTGCAGCCCATCTACAGAAATGTGCCATTGAATGTGCCATCGCACAGAACCAATTTTTCCAACCACCAAAGAGCTGGGTATTGGTCATTTGACTACGATTATATGCATGAGGTGCCACCGAAGCGTTTTTTCAGTGTGTTTGACCCATTTGATGACGAATACAAACATTGGAACAAATACGGCTCAAAACGGATGGACGAGCGATTGAACAGACAATGCTATTACCACAACAAGCGGCATTATTTTGTTGGATAAAATGCCAAAAAAAGAAAAACATAACGGCATTATTTTGTTCGACAGAATGCCAAAAACGATTGATTGATTTCAATTTTTTTGTTATGATAAAAAGGGGATCTACAAAACCACATCCTGGGCTAAATCTCTTTGCAAAAAAAAAAATAGGGCTGGTGATTTAAGCCACGAAAAATCGCCAAAAAGTCGACTAAAAAAAGTTTTAAAACAGCAAAAAAGGCACTAAAAAGCCATAAAAAGACGAAAAAAAGTAAAATTAAAAAGAAATATCCAAATTAACAAAACCAATTAAAAAAAAAGAATAACGGAGCCAATAAATTTTCATTTTTTCTATTTTTTGTTCCTCCGTTATTCTTTTACAGCGAATTCCAAATTGTTTCTTCCATTTGTTAATTATGTCTCGGCCGACTCCAATTTTCTTACAAATTTCGACATAATTTTGTTTCCATTCTTTTTCAACATTTTTCGGCGCTAAAATTTCATTTTTGGCCGTTTTACGTTTTACACCAATTTTCTGAAATAATGAAATTTCATAAAATCTCTTTAATTTTTCTAAAATCTCTTTACATTGTGAATTTATTTTATTTTTATTGAAAATATGTTTATTATTTTCGAATGAGCTCCAGTAGAAAGTAATAAAATTTTATTTAATCATTAATTTACCAATTGGCAATTATTTTGTCATTAAGATAAAATTATTATTATTATTTCTTTGAAATTAAACAGGATTTCCTTATTTTATTAAGTAAAATAATGATTTATTCAGTTTTTTAATCAGAAAAAAAATCATTTAAATGCCTCAAAAAATGAATTGCCATTTAATTGAAGAAAAATAAAATAAAATCATTTCGAGACGATAAAAATGAAATTATTTCCGCTACTATTATTAATTATATTATTTTTAATTGTCAAAATTGGAGCAGAAAAGAAAAAATTGCAACAAAAGTCATTTGGCGAAATATTTGGAGAAAAATGGCAAGAAAAAGAAGAAGAAGAACGAAATGAACTCAAAAAAAGAGAAATAATTGCAAAATTTTATAAAATAAAAGAGAAAATTAAGCAAAAAGGAAGAAAATTCTCAGCAAAAGAATGGAGCAAAATTGACAGAAAAATAGCGAAGAAATTAGGGACAAATCGCAAAAATATTCAAAAATGGATTAAAGAATTTGGTCTCCAAAAAAAGAAATGCTATAAATCAAAAACTGATGAAGAAAAATTAGAAATTGTGCAAAAATTCATTGAAATGATAAATGAATATAAGCAAAAAAGAAAATATTCAACCAAAGAATGGCAACAAAATCATAAAGAAATTTGTAAGAAAATTGGAGTTGGTTATGACACAATTAGAAAATGGAAGAAGCAATTTGGCATTAGCAAGAAAATAATAACGAAGGAAGAAAAAATAATAAAAATGAAAATGTATTGGCAAATAAAAAAAGAAAA
>Hetgly06068.t1 gene=Hg50
ATGTGTTCTCGTCGTTCATCCATCACTGTGAAGGAAGAACAAATTTTTGATTCGTTCATCAATTTTATACGCAGTGAGCTTTGGCAAATTCCGATCAACGAATTCATTGAACAGCGATCGATCGTGTTTGAGCGGGACTCAAATGTTGGCGATGTGTCGACAAGCGATGATACTTACCATACTTTGTACGGAGAGTACCGTAAGATTGTCGACGATTTGTTGGACGCCCATTGTTCGGACGGTGGCACAACTCGAGATGAGCTAATGAAAACGCTGAAAAGCATTGAACTGACGAAAAACTTGAGCCAAAAGGAACAGCTTTTTTTGGAGCCAATTGTTGCGGCACAAGACTTTGACGTGTTTGTGCCGATGATGATGCGTAAAAACATTGAATTGCAATTACAAGCACTGAAAATGATTGAGCATTTGAACGGACTTTTGCCCAGTTCGCTGAAGCTTGGTCAGGAGGACGCGGATATGTGGAATTCGTTGACTGATGAGGATGATAGTGAACGATTCATCATGATCTCAGTGATCAAACAAAGTCGTGATGAATGGGAACGTGATCAGCGCATGCAAAAAGAAATGCTTTCACAAATGGAGGCGGCAATTCGCGAAAGTCTAATGGACAAATCGGCACTGGAACAAATGCGTAGGAGAGAACAATTTTTGATGGAACAAGCACTGAATAAAAGTGCTCATTCATTCAGTAGCCCTTCACCAATCACGAGTGGCACAAGGCCAACAGCAACAAGTCTGGCACAATTGAAAATTGTGCCAAACTCGGTTGAAAAACGGCGGAAAAGTGCGGCGGATTTGCTCAATGAAAATGCAAATTACATAAAAATGGAGGAAAAGCCATCGATTAATGAGGAAAATCCAAAGCCGCCTAAGCTGGTGGAAAAGCGGATCTCTTTGGGCCAAATCCACGTTCCTCAACAAAGAAAAGAAATGAAGAACGAAACTCCAAAAGGCGGCGATTTGGCATACCGTAGTCTACTAAAGGAGCGTGATGGCATTTCTGAGAGCCAATTAAAAAAAAAGTCAAGAGCGCGAAAAACAATTATTTATGTGTCGACAAGCGATGATACTTACCATACTTTGTACGGAGAGTACCGTAAGATTGTCGACGATTTGTTGGACGCCCATTGTTCGGACGGTGGCACAACTCGAGATGAGCTAATGAAAACGCTGAAAAGCATTGAACTGACGAAAAACTTGAGCCAAAAGGAACAGGAGGCCGCTAAACAAATAAACGATTCGCGTCCTCAGACAGCAAAAGCAGCACGTGAATTGATGGAACAAAACAGTGAAGTGGACGAAGTGAGGCGACGAATTGCAGCAAAAATCAAAGCGGAAGTGATCAATGGGAAGTGA
>Hetgly06069.t1 gene=Hg52
ATGGAATATGCTCAAAGAGTTGCGCAACTTCGCGAGCATCGCAAAACAAAATTATGTGGAATCGGCAAGGAGTTGGTCAATTTCTTTAATTTTAAACATATGGAATTCTTCACTGCGCGACAGCAGCGTGTCCAATTGCCCGAGGGGTTGGCAACGATCCGAATTTGGAGTGTAGATCAGTGTACATCAATCCACACAATTGCAATTCATGGCAAAGCTGTGAACGACGTGTCGTTCCACCCGACTGGCGACTTTGTGCTCTGCTCCTCTGAGGACTCGCATTGGTCGCTAATCGATCTCAATGCTGGACGCCCTTTGGTCAAAGTTAAATCCAATGATGATTTGCCGTACATTTGCTGTGGCCAGTTTCACCCCGACGGGCTCATCTTTGGCACTTATGGAAAAAATGGCGTCATCAAATTTTGGGACATCAAAAATCAGAAAATTATGGCCCACTACGAGGGTCATCAGGGGGCAGTGGGGGCCATTTCTTTCTCCGAAAATGGCTATTATTTGGCAACCGGGTCAACAGATGGCCAAATCAAAAATTATTTATTTAATGCTTAA
>Hetgly06070.t1 gene=Hg53
AAAATATTGAAAAAAAATTTTTTTTTAATTATTTATTTTTTTCCTTAAATATGAATTTTCTCAAAAATATTTTTTTGTTTCTTCTGTTTCTGCTAATTTGCGTGATCAGTGTCGAGAATTCGTGCTTTAATTTTCTGTGTCCACCGAAAGAACAACGTCCGAAATCCAAGGAGAGCCCGAAGGAACGAAAAAATCTTTCAGGAGCAGCCTTAATTGGAAGCAAATTTAAAAAAATTGGTCGACACGTCAAAGATCTAAACCAATTGCCATATAACAAAAATTAGGAAGATTTAATTAAATTGCTGTCTAAGAAGTCAAGTGATTTTCCTCAAAATTTTGATTAAAATTTTTCCTTTTTTAATGACTCTGTGAATTTAAAACGGAGAGTAATATTTTTATGATTACCCAGTTTTCATGAATTCTAATAATTAAAAAGTCAGAAAATATTATATTTGTCCGA
>Hetgly06071.t1 gene=Hg54
ATGCCACAACCAACGGTTGTTTGTTGTGGTGGTGGCGGCGGTGGCTGCGGAGGAGGATGTGCCGGAGGCGGATGTTGTGGTCGCAGAAAACGAGAAGCCGTCCAACCGTTATTCAAGGACCGAACTGTGCCATGTCCACAAACTGAATGGCGCGAAATCATCAGACAGAGCATTTTATCATCGGCTACTATCGATTTCCCCACAACAAATTTTTTGTGA
>Hetgly06072.t1 gene=Hg56
TTTTTATTTTTTATTTTTTTTGATTGGGTCCCCAAAATTCATTCATTCCCATCAATTTGTTAATTTTAATGATTATGTTGTTCCATCACCAAAATTTGTTAATTTGATTATTTAAATTCGAAAAATTGAAACTTTTTCTTTTTGTGATCTCCATTTTTAAATTTTTTTTTTTGTTTACTTATTTATTTTCACAATATTTTTTATTTGAATTTAAATAAATTTACATTCGCGAATTTTTAAAATTTTTTTCCAGCGGCTTCTCTCGGCACCGCTTACAATGAGTCTCAAATTTTCAATTTTTTTAAAATTTTAACCGAAATTGATGCCAAATTGTTATTCCGTGCCAAAATCTGTCACATAAATCCTATATATTTTCATTTACTATGATAGCAAAAATTTCATTATTCAAATATGGGAATTTGTTTATCCAATTTTAAACGCTCCAAAAACCGAAATGGCTGTACAGGACGAAAACCACACGATATGATGCAACCGGACAACGCCAATGAAATTCGGGAGGGGGACCTGCATGAAATTTTTCGTGAATTCGATTTAAATGGTGATGGGTTTATCCAACGGGACGAGCTTCGTCAAGTGATGCTTAAAATGGGACAATCGCCGACGGAGGAAGAACTTTTTGCCATGTTTGAAGCGGCGGACACCAACACTGATGGGCAAATCTCATTTCAGGAATTCTTATGCATTGCGAGGGCAAATCCACTTTCATTGTCATTGAAATCTGTGTTCGATGAGCTTGACGTTGATGGCGATGGATTTATAACGCGATCCGAGCTGAGGATGGCATTCCAACAGATGGGCCATGCACTCAATGATGCCGATATCAAAGCCATTTATAAACGTGTTGACAAAAATCAGGACGGCAAAATCAACTTCAAGG
>Hetgly06073.t1 gene=Hg57
TTTTTTGTTCTCATTTATAAAACAAATAAAGCGAAACGCGCCCTGCGGCGCCTTAGGTAACGAAATGCGATATTTAAAAAAAAATAATAATAAGACCCCAATAACCACAACCAACAGCAAAAAATCTCAAAATTTGTGCATTCTTGAAAATGGCTAAAAAATTAACAAAGTCGCGTCGCAATATTTATTTCTCGTCGTCACCGTTACATTTGTTGGCTCATCTCATTTTGTTGCTGCTTTGGCCCATGCTTATTTTCAGCATGTCATTGCCCGACGGTGGTCCTTCACTATTGGAAATGCAAATCTCTTCACCGTCATCATCGCGCCCAAAACAGTCATTGGAGCATGCTTATCGTCAACAGTACCAACAACCGGAATCATTTAGCACAGAAACATCAAATGATGATGCACAATATGAGCATAAGGACGAGCAGCAGATTGGGAATTCAGCAGGCGTGTATGACACAAATCTCGAGTATAACATGACACGCGTTTTGAACGCATTAATTGCCAGCCATGATCGGCGAATTCGGCCGGATTTTGGCGGTGCACCAACAATTGTGAATGTGACTGCACATGTTATCACAATTAGTGCAATTTCTGAAGTTTCAATGGATTACACGGTCGATTTGTATTTGCGTCAATTTTGGCACGATCGCCGCTTGGCCTTTGCCGCATTCAAAGGCCATAATAATTTGACAGTTGGCATTGACATGGTCAAATCCATTTGGACACCAGACACTTTCTTTCCAAACGAGAAAAAATCGTATTTCCACGAAACAACGTCACACAATTCATTTTTGCGCATTGACAGTAATGGGAATGTAATTCGAAGCATACGACTTACAGTAACTGCGAATTGTCCGATGAGTTTGCATACGTTCCCGCTTGATGTGCAAGTTTGCTCCTTGGAAATTGAGAGTTACGGTTACAGTACCAGTGACATCATTTACCATTGGCACCCAAACAAGCCGGTGACCATTGATGAAGATGTGCACTTGGCACATTTTAGCATTGGTGGACATTACCAAATTGAGCGGACCATCTCATTAAGCACAGGAAATTACTCACGATTGACCGCATATTTTACCTTCAAACGAAATCTTGGCTTCTACCTCATTCAAATTTATTTTCCTTCTTCATTAATTGTCGTCATTTCTTGGGTTTCATTCTTTTTAAACCGTGAAGCGACCCAAGCCCGTGTGACAATCGGAGTGACCACTGTTCTGACACAGACAACACTAATGACTTCAACTAATGCTTCATTGCCTAAAGTGTCATACGTGAAAAGTTTGGACATTTTTCTTGGCGTCTGCTTTTTCATTGTGTTCGCCTCGTTGTTGGAATATGCAACTGTTGGCTTTCTGATGAAACGCCGACGGCAAAAAAGTTCGTCCACCTCCTCGTCGGTGATGCCACGCTCATCCACCGTTTGTTTTCGTGAATTGGAGGACGGCACGCTGAAAATGTTGGCACCAATGCATCATAATCACCATCAACAACGAATGCCACCAGAACGAAAACCCGCATTGGGACGCCAAGCGTCCGCAACACCGCCGGCATGTAAAATGTCCACCGTACTCGCATCAAATGGTGGCACTGAACTGACTACGCCATCAGCCGGTGTCCCGCTATTTAACCTGCACCCGCACACGGCATTTGTGCCGGTTGTCACCACCACCGGCTGTCACAACAGTGGCCAAGTTGGTGGTGCCAGCCGGGGCAGTTTGGCCTTCTTTGGCGGGCCAGACGATGCGCTGATGTTGACAATTCGTGGCAGCACAGATGACGGCACATCAGCAGCTGGCGCTGCTGAACAAAGGCGTGCTGGCGGATGTATAAAGGTTCGACCGTCTCAGGTGGACTTATTCTCGCGCATCGCATTTCCGCTGTTCTTCGTCATTTTTCATCTCGCTTATTGGTCATTCCATTTGGCATATTTGAAATTTGATAACATTTAATGAGAGATCTTTTAAAATAAATGTTATTTAATACGGTTATTGTTGTATATTTTTGGTGTTCAAAAAGATAAATACAAATTTTATGTAAAC
>Hetgly06074.t1 gene=Hg58
GAAATGGATGATAGTGAAAGTTTTGAAAGTCACAGTTCTGATCAGTCTATATCTACGGATGATCAGGATTCAGACGAAATGGAAAATTTGAATGATTTGACCAATGATAAAAAGAAAAAGATTGTAAAAATATTTTTTAAAATTAAAAGCAATTATCTGCAATTAATGAAAAGAAATAAATGCCAAAAAATGAGCAATGTTGAGCTTGAAACAAAAGTTGCGCAGCAAATTGGCATCCGCCGGAAGAGAATACGCACCTGGAAAAGAGAATTGGGTGTACAGAATACCGAAATAGCGATGAATTTTCCAAGAGAAAAAAAGCGCAAAATTGTTGCGCAATTTATTCAAATGAAGGATGAATTACACAAAAAATATCCATCAAAATCATGGCGTGAAATCAATCAAATGATCACTGACCAAATGCCAGTGCAAATTGGCATAATATATAGATGGAAAAGAGAATTTGGCTTAACATTCAACAAAACGTATTCGGAAAAAGACAAGGAAATGTTGATGAAAAAATATTCCGAAATTAAAAGTGACAATCCAAAAATTAGCGATTCTAAAATAGCTAAGAAACTGAAGATGGGCCAAAGCACATTGAAGGAATGGAAATCGGAGAAAATTAGCAAAAATGACAGCATTTTCTGGAAGAAAATTTATTCAACTGAAGAGAAAAATTA
>Hetgly06075.t1 gene=Hg59
ATGGAAAAAATCGCTGACGTTGGACGCCGATGTTTCATTAAAAATTCAATTGATGATTTGCAAGATGACATTGAGGAGAAGCCTAAACACATGGGAATTGATGATTCATCACAAATGGCACCTCTCATCAATGCCATGGCATGGAAATGGAATCAAAATTTGATCAGTAGAGCGAATTGTTTTTATGATTTGTTGCTGAAGGGGAAAAGCCATTTCCGGTCCCGGCCATTTGGCATGCTTGTGCCTGTCTCGGCCTTAGGTAGAGCGAATTGTTTTTATGATTTGTTGCTGAAGGGGAAAAGCCATTTCCGGTCCCGGCCATTTGGCATGCTTGTGCCTGTCTCGGCCTTAGGGTCTA
>Hetgly06076.t1 gene=Hg60
ATGTGTGCAGAAAATGCCAGAGGAGCGGGCACATCGAGCGACAGTAACCTGAACATTAGCCTGCTGTCTACACATGAACGGCACTCGCGCAAAAGGAATTTGCAAAATGTGGCCGATTTTCTAAATGCCGAATTGTTTGGCCGATGTGTTTCTGTCACCGCTCCGCGACTGATCACAAACGAACGCGACGATTTGCTAATTAGCCAAGCGGTGCTAAAGTGTCGGGCACACCCGCTCTGA
>Hetgly06077.t1 gene=Hg61
ATGGCGCGACATTACAGCGGCGGAGGTGCCGTTTATCACGACGAAGGTAACCTGAACAGTAGTCTGCTGTCTACACATGAACGGAACTCGCGCAAAAGGAATTTGCAAAATGTGGCCGATTTTCTAAATGCCGAATTGTTTGGCGGCACGCGGGCCTTGACTTATGAGCTCGTTCGCACTCTGCCTCTGCGTATGACCGCTTCCGTCGTGTTTCTCAAACTGTTACTCGCGCGCATGCTATTGACCGTGTCGCTATCGATATTTCACCGCTTGAATAATCTGGCCCGAACTGTTGAAACCATCAAAATTTGCCTTCAGTCCATTCTCGCGGCCCAGCAATTAAACAGCTGGGACATTAATCATTGCAACGAGGGAATTTACGTTTATGATTTTTTGTTGGTCGAGCATTTGTCGAAAAATAACTATTTTGTGTCGGTGCGCTCGGTTATGCCGGCCAACAGTGCCTTTGGATTGTTTTACTTTGAAATTACCATTATGCAGATGCAATCGGATGTTGGAGTTGGACTTGCCCCAGAGCACATGAGGATGCATGAATTGGTCGGGCATTTTGAGGCAAGCATTGCGTTGTGGAGCGACGGGTCTATCCACAGCAAATTGCCATATGTGCCGGATGTGCTTGACGGATTCGCACAGTTTGGTCCCGGTGATGTTGTCGGATGCGGAATGGACGCAAACAACCGGGGCATTTTTTTCACATTGAATGGCCACAAAATTTCAAGCCAATTTTTGCAAGCCGAATCGTTTCACATGTATGCGTGTTGTACTCTCGTGGACATGAATGACTCCGTCCAGGCAAATTTCGGGCCCGACTTTCTGTTCAGCATTGTCGACATGTTGCCCTTCTGA
>Hetgly06078.t1 gene=Hg62
ATGTGTGCAGAAAATGCCAGAGGAGCGGGCACATCGAGCGACATGCGTGTGCTCGCCGGTGGCGGGTATCTGCCGAGCAGAACACAAACCGGGAAAAACAGTCGTCACGTTGAGGACGGTGATTCTCTTCTCATTTGGAGACATCTGCCAAATTTTGGGGGAAAAAATCGGTTTTTCAAGAAATTCTCCAGCGGTTGTCATCGGCAGATATCAAAATCCGTGGTTGGAAAGCGATGTCCATTTCTGGGCGGCAATGGCATTCGAATGGCGCGACATTACAGCGGCGGAGGTGCCGTTTACCACGACGAAGGTAACCTGAACATTAGCCTGCTGTCTACACATGAACGGCACTCGCGCAAAAGGAATTTGCAAAATGTGGCCGATTTTCTAAATGCCGAATTGTTTGGCCGATGTGTTTCTGTCACCGCTCCGCGACTGATCACAAACGAACGCGACGATTTGCTAATTAGCCAAGCGGTGCTAAAGTGTCGGGCACACCCGCTCTGA
>Hetgly06079.t1 gene=Hg63
ATGTACAATAAGCACTTCTCTGTGCAGCCCATCTACAGAAATGTGCCATTGAATGTGCCATCGCACAGAACCAATTTTTCCAACCACCAAAGAGCTGGGTATTGGTCATTTGACTACGATTATATTGTGTTTGACCCATTTGATGACGAATACAAACATTGGAACAAATACGGCTCAAAACGGATGGACGAGCGATTGAACAGACAATGCTATTACCACAACAAGCGGCATTATTTTGTTGGATAA
>Hetgly06080.t1 gene=Hg65
ATGGCGCGACATTACAGCGGCGGAGGTGCCGTTTATCACGACGAAGGTAACCTGAACAGTAGTCTGCTGTCTACACATGAACGGAACTCGCGCAAAAGGAATTTGCAAAATGTGGCCGATTTTCTAAATGCCGAATTGTTTGGCGGTTGTGCTTCTACCACCGTCAAATTCATTATTGCTTTTGTGACTTTTTGCCTTCTGTTGAGCTTCATTAGTTTTAGGGCTCGTTCGCACTCTGCCTCTGCGTATGACCGCTTCCGTCGTGTTTCTCAAACTGTTACTCGCGCGCATGCTATTGACGTTGATGAGCCAATTACAAGTGCCGCGTCGAACCCTTTTGCTGGACGTTTTCCAATTGCCGATAGCGTGTCGCTATCGATATTTCACCGCTTGAATAATCTGGCCCGAACTCAATTAAACAGCTGGGACATTAATCATTGCAACGAGGGAATTTACGTTTATGATTTTTTGTTGGTCGAGCATTTGTCGAAAAATAACTATTTTGTGTCGGTGCGCTCGGTTATGCCGGCCAACAGTGCCTTTGGATTGTTTTACTTTGAAATTACCATTATGCAGATGCAATCGGATGTTGGAGTTGGACTTGCCCCAGCGCACATGAGGATGCATGAATTGGTCGGGCATTTTGAGGCAAGCATTGCGTTGTGGAGCGACGGGTCTATCCACAGCAAATTGCCATACGTGCCGGATGTGCTTGACGGATTCGCACAGTTTGGTCCCGGTGATGTTGTCGGATGCGGAATGGACGCAAACAACCGGGGCATTTTTTTCACATTGAATGGCCACAAAATTTCAAGCCAATTTTTGCAAGCCGAATCGTTTCACATGTATGCGTGCTGTACTCTCGTGGACATGAACGACTCCACCCAGGCAAATTTCGGGCCCGACTTTCTGTTCAACATTGTCGACATGTTGCCCTTCTGA
>Hetgly06081.t1 gene=Hg66
ATGTGGAATTCGTTGACTGATGAGGATGATAGTGAACGATTCATCATGATCTCAGTGATCAAACAAAGTCGTGATGAATGGGAACGTGATCAGCGCATGCAAAAAGAAATGCTTTCACAAATGGAGGCGGCAATTCGCGAAAGTCTAATGGACAAATCGGCACTGGAACAAATGCCGGTTGTCATCGGCAGATATCAAAATCCGTGGTTGGAAAGCGATGTCCATTTCTGGGCGGCAATGGCATTCGAATGGCGCGACATTACAGCGGCGGAGTCTACACATGAACGGCACTCGCGCAAAAGGAATTTGCAAAATGTGGCCGATTTTCTAAATGCCGAATTGTTTGGCGGATGTGTTTCTGTCACCGCTCCGCGACTGATCACAAACGAACGCGACGATTTGCTAATTAGCCAAGCGGTGCTAAAGTGTCGGGCACACCCGCTCTGA
>Hetgly06082.t1 gene=Hg67
ATGTACAATAAGCACTTCTCTGTGCAGCCCATCTACAGAAATGTGCCATTGAATGTGCCATCGCACAGAACCAATTTTTCCAACCACCAAAGAGCTGGGTATTGGTCATTTGACTACGATTATATTGTAGATCAGTGTACATCAATCCACACAATTGCAATTCATGGCAAAGCTGTGAACGACGTGTCGTTCCACCCGACTGGCGACTTTGTGCTCTGCTCCTCTGAGGACTCGCATTGGTCGCTAATCGATCTCAATGCTGGACGCCCTTTGGTCAAAGTTAAATCCAATGATGATTTGCCGTACATTTGCTGTGGCCAGTTTCACCCCGACGGGCTCATCTTTGGCACTTATGGAAAAAATGGCGTCATCAAATTTTGGGACATCAAAAATCAGAAAATTATGGCCCACTACGAGGGTCATCAGGGGGCAGTGTACATTGAAAAAGTTGTAAATTTCTTTGTCATCGGAGCGGACCTGGGGCTGAATCCCTTTGCTAGCCATGACGCGTGCTGA
>Hetgly06083.t1 gene=Hg68
ATGGTTGTTCATGTCAAAAAACCCAAAATTTCTCGGCTATTACCAACTGAGTTGCTTTGTGAGCAGATGATGTTCATCCCAATTATGCGCCTTTTTTCTCAAACGGAGAACGAAATTGTGAAGAAATTTAACATGGCAAGCAGGGCGCGAAAAGTGCAGTTTGAGGTGGACAATTTGGAATTCTGTTCACTTCGCGAAAAAAATGGATTGGCGAAGGATGACTTCCGAAAGGGCGTCCTACTGTATCTGTGCTATGAGGGAAATGAAACAGCAATGTTGGTGAATAATGTTGCAATTTCCGTTCCCATTCTGAACTGTATTTTTATTCGTCCACTTTTGGAGCAACTATTTGAGTTCATCCTGGAATCACCAAACCCTTTCACCCTGCAAAAACGGATATGCGTGGGAGGGCATCATCCGATTCATTTGCCCAAGTCCCTAAGTCTGTCAGCACGCGTCATGGCTAGCAAAGGGATTCAGCCCCAGGTCCGCTCCGATGACAAAGAAATTTACAACTTTTTCAATGTACACCTAAAAAGAGTGGTTGGACGGGTCACGATTTTTTACCATCTTCGGTTTGATGATACTTTTTCCGTTATGAGCAGCCATTTCGTGTTGGAATGCTAA
>Hetgly06084.t1 gene=Hg70
ATGAGGGTGTCATACGTGAAAAGTTTGGACATTTTTCTTGGCGTCTGCTTTTTCATTGTGTTCGCCTCGTTGTTGGAATATGCAACTGTTGGCTTTCTGATGAAACGCCGACGGCAAAAAAGTTCGTCCACCTCCTCGTCGGTGATGCCACGCTCATCCACCGTTTGTTTTCGTGAATTGGAGGACGGCACGCTGAAAATGTTGGCACCAATGCATCATAATCACCATCAACAACGAATGCCACCCGAACGAAAACCCGCATTGGGGCGCCAAGCGTCCACAACACCGCCGGCACGTAAAATGTCAACCGTACTCGCATCAAATGGTGGCACTGAACTGACAACGCCATCAGCCGGTGTCCCGCTATTTAACCTGCACCCGCACACGGCATTTGTGCCGGTTGTCACCACCACCGGCTGTCACAACAGTGGCCAAGTTGGTGGTGCCAGCCGGGGCAGTTTGGCCTGCTTTGGTGGGCCAGACGATGCTGCGCTGATGTTGACAATTCGTGGCAGCACAGATGACGGCACATCAGCAGCTGGCGCGGCTGCACAAAAGCGTGCTGGCGGATGTATAAAGGTAATTAAGAGTGGCAGTGAGCTTTGGCAAATTCCGATCAACGAATTCATTGAACAGCGATCGATCGTGTTTGAGCGGGACTCAAATGTTGGCGATGTGTCGACAAGCGATGATACTTACCATACTTTGTACGGAGAGTACCGTAAGATTGTCGACGATTTGTTGGACGCCCATTGTTCGGACGGTGGCACAACTCGAGATGAGCTAATGAAAACGCTGAAAAGCATTGAACTGACGAAAAACTTGAGCCAAAAGGAACAGCTTTTTTTGGAGCCAATTGTTGCGGCACAAGACTTTGACGTGTTTGTGCCGATGATGATGCGTAAAAACATTGAATTGCAATTACAAGCACTGAAAATGATTGAGCATTTGAACGGACTTTTGCCCAGTTCGCTGAAGCTTGGTCAGGAGGACGCGGATATGTGGAATTCGTTGACTGATGAGGATGATAGTGAACGATTCATCATGATCTCAGTGATCAAACAAAGTCGTGATGAATGGGAACGTGATCAGCGCATGCAAAAAGAAATGCTTTCACAAATGGAGGCGGCAATTCGCGAAAGTCTAATGGACAAATCGGCACTGGAACAAATGCGTAGGAGAGAACAATTTTTGATGGAACAAGCACTGAATAAAAGTGCTCATTCATTCAGTAGCCCTTCACCAATCACGAGTGGCACAAGGCCAACAGCAACAAGTCTGGCACAATTGAAAATTGTGCCAAACTCGGTTGAAAAACGGCGGAAAAGTGCGGCGGATTTGCTCAATGAAAATGCAAATTACATAAAAATGGAGGAAAAGCCATCGATTAATGAGGAAAATCCAAAGCCGCCTAAGCTGGTGGAAAAGCGGATCTCTTTGGGCCAAATCCACGTTCCTCAACAAAGAAAAGAAATGAAGAACGAAACTCCAAAAGGCGGCGATTTGGCATACCGTAGTCTACTAAAGGAGCGTGATGGCATTTCTGAGAGCCAATTAAGTGATCGAAGGCAATATTTACGGGAACAGAGGGACAAATTGTTGAAGAAAAAAAGTCAAGAGCGCGAAAAACAATTATTTGAGGCCGCTAAACAAATAAACGATTCGCGTCCTCAGACAGCAAAAGCAGCACGTGAATTGATGGAACAAAACAGTGAAGTGGACGAAGTGAGGCGACGAATTGCAGCAAAAATCAAAGCGGAAGTGATCAATGGGAAGTGA
>Hetgly06085.t1 gene=Hg72
CAATGAGTCTCAAATTTTCAATTTTTTTTAAATTTTAACCGAAATTGATGCCAAATTGTTATTCCGTGCCAAAATCTGTCACATAAATCCTATATATTTTCTTTTTTCCCTCCCAGTCAACTTCTCGCATTATTAGATTTATAATAAATCATTAACATATTTATATTATTTTAATTAGAAAAATTTTAAAAAATTAATTTAAAAATAAAAAAAAAACCGAAATGGCTGTACAGGACGAAAACCACACGATATGATGCAACCGGACAACGCCAATGAAATTCGGGAGGGGGACCTGCATGAAATTTTTCGTGAATTCGATTTAAATGGTGATGGGTTTATCCAACGGGATGAGCTTCGTCAAGTGATGCTTAAAATGGGACAATCGCCGACGGAGGAAGAACTTTTTGCCATGTTTGAAGCGGCGGACACCAACACTGATGGGCAAATCTCATTTCAGGAATTCTTATGCATTGCGAGGGCAAATCCACTTTCATTGTCATTGAAATCTGTGTTCGATGAGCTTGACGTTGATGGCGATGGATTTATAACGCGATCCGAGCTGAGGATGGCATTCCAACAGATGGGCCATGCACTCAATGATGCCGATATCAAAGCCATTTATAAACGTGTTGACAAAAATCAGGACGGCAAAATCAACTTCAAGGAATTTTGTGAGATGATGACCCGAGGAAGCACTAGCAACAGTAGCAACAGCAATTCATGATGATAAATGAATGACGGAAGAAGGAATACACCATAAATTGTCCAATTAACTTAAGCCAATTAATGGTTGCTTAATTTTTCCGGAAAACACTTAAATTGGCCTAAATGATAAAGATTAATTAATCGGAA
>Hetgly06086.t1 gene=Hg73
ATGACACGCGTTTTGAACGCATTAATTGCCAGCCATGATCGGCGAATTCGGCCGGATTTTGGCGGAAATTACTCACGATTGACCGCATATTTTACCTTCAAACGAAATCTTGGCTTCTACCTCATTCAAATTTATTTTCCTTCTTCATTAATTGTCGTCATTTCTTGGGTTTCATTCTTTTTAAACCGTGAAGCGACCCAAGCCCGTGTGACAATCGGAGTGACCACTGTTCTGACTCAGACAACACTAATGACTTCAACTAATGCTTCATTGCCTAAAGTGTCATACGTGAAAAGTTTGGACATTTTTCTTGGCGTCTGCTTTTTCATTGTGTTCGCCTCGTTGTTGGAATATGCAACTGTTGGCTTTCTGATGAAACGCCGACGGCAAAAAAGTTCGTCCACCTCCTCGTCGGTGATGCCACGCTCATCCACCGTTTGTTTTCGTGAATTGGAGGACGGCACGCTGAAAATGTTGGCACCAATGCATCATAATCACCATCAACAACGAATGCCACCCGAACGAAAACCCGCATTGGGGCGCCAAGCGTCCACAACACCGCCGGCACGTAAAATGTCAACCGTACTCGCATCAAATGGTGGCACTGAACTGACAACGCCATCAGCCGGTTCGACCGTCTCAGGTGGACTTATTCTCGCGCATCGCATTTCCGCTGTTCTTCGTCATTTTTCATCTCGCTTATTGGTCATTCCATTTGGCATATTTGAAATTTGA
>Hetgly06087.t1 gene=Hg74
AGAAAATTGATACACAGTTATTATGTTCTTATCAATAATTGCATCTTCTTTATTTCTGCTCGTAATTTTATTTTTACTTCACATCACTGAGCTTTTTGCTTCACTTTCATCAACCCATGAGACAAATGTGCCGGTTATAATTGACACGCCCAATGGTCGCCTGCGCGGTTTTGAATCCATTTTTTTGCACAGTCGGGTCAGCTCATTCCTTGGCGTTCCGTTTGCTGAGCAACCGATTGGCGACCTTCGGTTTCGGCCTCCACAACCAAAAAGGGCATGGAATGGAACCATTGATGCGATGACCCTTTCGCCCACATGTTACCAAGGCCGTGACACCTATAATGAATCTTTTTGGGGGTCCGAAATGTGGAATGCGAACACTCCAATCAGTGAAGATTGTCTGTACATGAACATATGGGCACCAGTAGATGCCAAAAATTTAACTGTGATGGTTTGGTTCTTTGGTGGTGGCTTTTATTATGGGAGCCCATCTCTAATTCTCTACGATGGAAAGGCATTGGCATTGACCGGAAAAGTAGTTGTAGTGAACATAAACTACCGTCTTGGCCCATTTGGATATTTGTTTTTGGACGATGAAGAAGTGCCTGGAAATATGGGAATGCTTGACCAGCAATTAGCACTTCATTGGATTCGTGACAACATTGCGGCATTTGGGGGAGACCCAAAAATGGTTTCAATTTTTGGCGAAAGTGCCGGAGCATCAAGCATTGTTGCACATTTGATTGCACCAAATTCGCAGGGACTCTTCCAGAATGGCATTTTGCAATCAGGTTCGCTGGACAACAAATGGAGTATGGACACGCCGCGGCGCGCGTATGATAAAAGTATGCAGCTGGTGCGGCTTGTCGGCTGCAACCGCACTTTGCTCGCGGATGCCATCCGCTGTCTGCGCCGCATTCCGCCCGCCGACTTCACGGAACAGTTGTGGAACATGCAGTTGAACTTCCTGGAGTTTCCGCTCGTCATTGTGTCGCGGGATGCCAACTTTTTCAGCGCCGAGGACGCGTTTGAGGCGCTGCGCAAGCGCCACTACGCACAGGACGTGAACCTAATGATCGGCATCAATCATGACGAGGGCACTTTTTGGAACATTTACAACATCCCAAAATTCTTTGATGTGCCACATCAGCCAATGCTTAGCCTGGATAATTTCAATGAATGCGTGAAGACGGCATTTTCGCGCTTGCCAGACATTGTCCGAGACGCAGCATCGCATGTTTATTTGGGCGCACGGCGTTGTGAGTACGAGACGGGAATGCACAAAAATTTGGCCGATCAAGTCAATCAGATGGTCGGCGATTATTTTTTCACTTGTGACAGCATTTGGCTGGCTGATCAGCTTGACAACTCGCCAGCCCGTGTTTACGTTTATTACTTTGACCAAGCGTCGAGCGCTAATCCGTGGCCAAAATGGACTGGTGTAATGCATGGCTATGAAATTGAATACGTTTTTGGCGTCCCAATTTATAATGAGAGTGCCGGATATACAAAAAGAGAGCAAATTCTTAGCCAAAAAATGATTAAGCTGTGGACATCATTTGCTTCCACCGGGATTCCAAGCTTGGACCATCGTGAAGGCTTCTCGGATCGGCTTCATTGGCCCCAATACCATTCGCAGAACAACCCTCGTTGGCTTGAGCTCCGAGCATCGCACATCAGGCCAATGCGCGCAACAAAAAAGCAGGAATGCCGTATATGGCGAGCATCGCGAGACATGGAATACAACGAATACATGATGGAAAAATTGACATCCGCTTTATCTGCATCATTTGCAAAAACGCGACTATTTCCACAGTCAATTGTAGCTATTTTTTTCACACTGATCTCTGTGCAAAAAATTCTCATTTACTAGTAAAAAAAAATTGTCAT
>Hetgly06088.t1 gene=Hetgly06088
CGAGAACCAACAATGGCCTCGAAGCAACGCACCTCCATTTCGCTAAGGGTCTTTGTCACCACCCGGCCCTTTCCGACTTTATTTATGAAGTCAGCAGAAGTATCGACAAACAAGTGGACGCAGCGAGATCAGCTCGGAACTTCATACACAAACGACACAAACGCTACGTGCTGCAAGACGCAGTCATCATGCGAATTTTAGCGGACGCCACATACGACAATGATGCCGAAATTCACGATGTTATGACGGCTCTTGGTCTGCAGGTCGAAGGATATGCAGGAAAATTGAAGGACTATGAAAATTTTGATGATTCGACCATGCATGTCCCTTAAAATT
>Hetgly06089.t1 gene=Hg78
ATGTGTCGAAAAGAAGTAAAAATTCCGGACGAATTGTCACCTGGTCACAATCATAATGATAATGATGGTGGAACATATATAGTAATTGAGGATGGCGATGATGATCAGACAAATATTCCCATTGAAATGGTGGGAGAAATCAACGAAACTGATAATCCAGAACAAGCAGATGAATGGGAGCCTTATGTTGGAAAATCAAAAATTCCAATTGCTTAA
>Hetgly06090.t1 gene=Hetgly06090
AGAAAATGATTAAGAAATTATTCATTTTATTTGGATTTCTTGCACTCATTGGATTGTTCCATGCAGCTCCAACAAAATTACAAAAACTGAAAAAATTGATTTCATTTGGCAAGAAATCAAAATATTTATATAATGAAAGCCCAAAAAGTTCACAAAATGGCGAATCGGACGACAATTGCTCAATTTGCTTGGCCAGCTTAGCTGTTACTGACAATTCTCCGTTGAAAACACTACAGAACTGCAGACATAGCTATCATCGAAAATGCATTGATGAATGGTTACAAAAAAGTAAGCAATGCCCAATGTGTCGAAAAGAAGTAAAAATTCCGGACGAATTGCCACCTGATCATAATGATAATGATGGTGGAACATATATAGTAATTGAGGATGGCGATGATGATCAGACAAATATTCCCATTGAAAATGGTGGAGAAATCAACGAAACTGATAATCCAGAACAAGCAGATGAATGGGAGCCTTATGATAATCAATCTGACTATTCAGTGGATATTACACCAAATGCGCCACACGATTCTGACAGCGAATCTGATCACTCAGTACAAATTTCAACAAATGTTCCTCATGAAAGTGATAACGATTCGGATCATTCCGTGGATATTTCTTCAACAAATTTGGAAGGATTAATAATTTCAATTGAAGGAGATGAAGACCCAAATCATGCTGCTGGTCTAACCCAACCTTCTTCTGCAGGATCTGACGAAACTGAACAGTCGGTTGAAATTTAACCCAATGAATTGCCGAATTCAAATGTCTTCTGATTTTTTTTTAATAAAAATTATTTGATCCGCCATCGAAAGACATCGAAAATATTTTTATTTTAATAAATGTGTTTTAATTTA
>Hetgly06091.t1 gene=Hetgly06091
ATGATAAACAACGTGAATTATCCAATCAACGCCCCTTATGCAAATATTATTGTTTCTGGCGGACGCCTTATTATCAACGGGGAAGACCGTGGTGTGACAGCGCCTGGAGCACATCTTGATATATCGGCAATAGGAAATATTTATATTTACATTGGAAATGTCGAAGGTCGAACAATTACTGTCATGAATGCAAATCCTCCTTTGGAAGAAGTCGAATGGGAGGCGCATGATCATTTATTATACGATTCGGATGATTCGGTTCACATATCAAACGCCGATGATTCGGATGGTTCGGTTCACATTTCAAACGTAGATGATTCTGATGGTTTGGTTCACATTTCAAACCCCGATGGACATTCATCGCAAGATGAAGGAGAATGGGAGCCATACGAACACTTGCTAAATGTGCTCGATGACGTATAG
>Hetgly06092.t1 gene=Hetgly06092
ATGGAAGACACAGTTAGTTTGGCCAGCATGGAGGAAGAGTGGTACGAAATTGATGAAGTGCAACCGACCGAACAACCCAGTTCAACAACGACACCAACGGCACATCGGGATGACGACATTTACCATGACGACGAACCGGCGGTGAAGGTCATAGCCCCAATTTTGATATTGGGGCAAGGGGAAGAGGACGGTGGTGCGATCCGTAATTGTCTCATCAGCGCCGACGCACGACAATTTTGCCATTTTCCCGAAGAATGGGACGCCCACCTTTTTACGGAAGAGTTGCAAATTGAAAGCGTGCAGTCGTTTGAGAATAAAGAAAATGCGGTTTGGTTTCTCAAAGCCTTCAGAAAGAATTGGGAAAAGAACGGAGCGGATTTTTGGACATGCAATTTAATACCCGCCCGTATCCCGATTTTGGATGCTAAGGTTTCAACTCAAAGGGGATCTCTCAAGATCCAGGGGATCCTCGAATCCCGTTGTTTCTGGTTGGCATAA
>Hetgly06093.t1 gene=Hetgly06093
ATGCTTAATAATTCCATTGTTGAAGGTGATGAAGACCAAAATCATGCTGTTGGTCAAACCCAACCTTCTGATGGTTGGCAGCCTCATGAATATTTGCTAAATGGATCAAGCGAATCTGAACGATTGGTTGACTTTTCACCCAATGAATCGCCAAATGCAAATGAAATAGTTCCCATTCCGACGCCTAATAATTCCGCTAACGTTCAAGTTGCGCAAGATAATGATGCTTGGGAGCCATATGAACATTTATTAAATGTCCCAGAAGAAGGCGAGTGGGAGCCTTACGGCCATTTACTGAATGATTCTGACAATGAATCTAATCATTCAGTTTATTTGTCACCGGAAAGATCGCACGAAAACATAAGCGATGAGTATCTGAATTCTGCTGCTAATCCTTCAAATGGTGATAAAAATTTGTCCGATTGGCAAGTCCTCCCAATTCGCCACTTCCTCCTCATGTCCTCCTCACTTTCTTCTCCCTCCATTTTCGCCATTCCTCTTTCGTTCCGTCTGCACTCGCTCAACTCGTCCAGCCGTTTCGCCCTCGTTGACCGCCTTGTGCCAAATTCGCCGATCGTTTCCCTCCGCCAAGTTGAGATTGGCTTCGTTGTCCAACTTCTCCTGGTTTGGGAAATGCAAACAAAAGGGGAAAAAACTGATCCAAATGAAGAAGCAGCGATGAGCCGATCACAAGTGCCAGAGGAGGAAACCAATGTCGCTCGACAGCTGCCAGATCAATACAATATCATGATAAACAACGTGAATTATCCAATCAACGCCCCTTATGCAAATATTATTGTTTCTGGCGGACGCCTTATTATCAACGGGGATGACCGTGGTGTGACAGCGCCTGGAGCACATCTTGATATATCGAAACAAATAAAATGCCAACACATCTTTCATGAAAAATGCATTAATATATGGCTTCAAGAAAATACAACATGCCCAATCTGCCGACAATCATTAACTGATGATGCGCAATCTGTGCCAACTGATGAACCTTCAAATGAGTTTGATGTTGACTCTTTCTCATTTAGTTTTGGTGATGAAGGAGAATGGGAGCCATACGAACACTTGCTAAATGTTTCTGGAATTGATGCTTCTAATACTTCTCCGGAAGACATATTGAATGGTGAAGCCACAGAGAATGAAAGAAACGGAATATTTTATGCTGATGCACCACCTCTGTCAACCCTGCCAGCTGACCAGCTGCGCCTCTTGGAAGCTGCTACCGTTGGAACGAGCGTTACTGTGCGTGACAATGCTGGACGTGTTCATACTGTACAAATTCGACAAGTCTAG
>Hetgly06094.t1 gene=Hg83
AGATGAGTATTAAAATAATTATTCTTTCATTAATATTTTTCACAATTTTTGAACTCAACAATGCTACACCAACTCAAAGCTCTAAGGTTGGTGAGCCAAGTAAATGTTCAATTTGTCTGCAACAATTATCAATTCCACGAGAGAACAACAAGAATAAAAATGTTACCATCCTGAAGTGCAATCATGCTTTTCACACAAAGTGCATTCAAAAATGGATAAAACGAAGTAAAACATGTCCACCATGTCGAGCTGAAGTATTGGAAGGTCAAGTTTTTTTAATTAATTCAAAACAAAAACAAGAGCATCAGCAGCAGTCCGCTCAACCAAGTACATCAAGAAGGCAAATAGAGCAAATGAATTCTGGTCCAACCCGACAACCACCTGCTGCTGTGCAACGAATAAATTCATTTGGACAAATACGACAAAATAATTCTAATCCTTCTAACTCTCTCCAACAACGGCCTGTTATTCAACGTACATCTTCTGGTTTAGCGGGACAAATTAGTTTGAATACACCCCAACAGCGGAGTGATAATCGCGCTAATGCACCAAACTCAATCACACGAACTAATTCTGACCTACCCCAGCGACCTTCTCAAAATCCATCTGCTGGCCAGGTTAGACAAAATTCGGCTCGACAACAGGCGAAGAGGGTTGCCCAATCGAACACGGCAAATACGAATACAAGGAATTCAATGGTGCGACGAAACCCTAATCAACAATGGCCTGCGAGCACTTCAAATATAAATGAATTGAACTCAATGGTGCGACGAAATCCTAATCAACAATGGCCTGCGAGCACTTCAAATATAAATGAATTGAACTCAAGTCAAGTGGTGCGACGAAATCCTAATCAACAATGGCCTGCGAGCACTT
>Hetgly06095.t1 gene=Hg83
GTAAATGATATATCGTTACAAAAATATACAAAAAATACTTTATTCATTTAATTATACTATTAATATTAAAATAGAAAATAAAATATTATCATTCATCATACTAATTAATTTAAAACCCTTTATGTCATCAGTCGCACAGTGCACATTCCAGTAATTTCATTAATTGGGACACTTTTATTCAATATAAATATATAAAAAATAATCCTCTAATTAAGATGCCGCCGAACTGGATCGGTTATTAGCGCTACAATTACACATTAAAATGAAGCAGCAAATGCGATTACGAGACGAAGGATTTGCACGCCGAACACAAGAACAGGAAGACCAGGCTGCGGAATTAAATTCATTAGAAGTTGCACGCGCGATACAAGAGGAGGAATATGAAAGAGGGATAATGAATTCGTCACCAGAAGATGAACATCGAACTGGAAGCCAAAATTCAAGCGAGTCATTGGAAAGCATCTCAACTGAACAAAATGATGACGATTGTGCAATTTGTTTGTCAAGTCTTTCTGATGGAAATGAAAAGGGCTCTGTGAAAACGGCAATTCCATGCAATCATTTGTTCCACCGCGACTGCATCAATGTTTGGCTAAATACGAGAAAAAATTGTCCCATTTGTCGTGCACCTGTTAGTGCTGTCAACGATGTGGGCCAATCATCACAAGGTGGAGCATCAAGAAATGATGGACAATCCATACAATTTCCTGATGAATCAACACTACCTGCTAATGAATTGCCGCATTACTACGAACAGATTGCTTTATTGCAGTTAGCAACGATTCAAACGAAGCTTTTGATGGAAGAAGAAAATGGTCAAATGAAAATTGTGATGATTGTAGACATTGACCTCAATGCTAACCATCAGCAGTATTTAACTGTGATAGAACCGAATCAAGAAATTCATACATTATACATTGGTCGGAACGGTCAAAATCGTATGACATTCCGTGACAATGATCGACGCTTGAATATTTCGCGCATAATAGCAATTATGCCGGATGATAATTGATGATGAATTATTTATACCTGCAAATACATTGTAAATGTGATTTTTATGGAGATAATTGTTCTTTTATATGTACATTAACCTTGACCGGTAAATGCGTC
>Hetgly06096.t1 gene=Hg84
GCAGATTAATTTTTTTAAATATTTTTTTTTAAATTTAAAATGTGGAATACATTGGTAATTGTTATGCTTTCTTTCATCTATATGTTTTATTTAAATGATGCAAACCCAAACACTCATAAAAGCAAACAAAAGGGGAAAAAAACAGTCAATTCGTCTTCCTCTGTTTCATTTGAATCTTCACCACCGGCAGCAGCAGGAGGAAAAATGAAGGAAATAGGCGGAAAAAAAATTTGGAAGCAAATTGGAAGTTTTTTAGGTGATAAAAAGCAAAAAGCAATTAAAGAATCATCGTCCTCATCTTCATCAACAAGTATTGAAATTGAACACATTGGTCTAAGCAATCGGCAATTTGGGTGTCAAAACAGTTCACAAGGGCTGATAAATCGGCCGATAGTCGACGACGACCAACAAATCAATCTGACAGCCGCAGCCGTCATACTCCAGGATACAGTAGCAAATAGGCAGGGACAACAAGTGAGACAATCAAGCAGACGCAATAATGTAAGAATTCGTGAAAATGAAAGAATTCCGACAAGGCAGGGCAGTGAAGATACAGTAGCAAACCGAACAAATGCCGGACACCAATCAGTACAATCTAGCTACCGTCACAGTGTAGGAAATATGGGAAAACAAGTATATGAAAAACGGTCTGACAGTAGCGATACTGTAACGACTCCGGCAAATAAGGATTCGATAGTGAATATGAGAGCCGACCTACTGAATTTGCCAAATGATCGAGATTCTGAAAAAAGCCGTTCGAAAATTGAACAAAGAGTTAAAAAACAAAAACCAAAAGAATGTTGTTCAATTTGCTTATCAAAAATTGGTTCTAAAGCGAAACAAATAAAAAGCCAACACATCTTTCATGAAAAATGCATTAATATATGGCTTCAAGAAAATACAACATGCCCAATCTGCCGACAATCATTAACTGATGATGCGCAATCTGTGCCAACTGATGACCTTCAAATGACTGATCCATCAAGTTCTTTGCCAGAAGTTGGTCAAGCTCTTGACAGAACTGAAGATGAAGGACCTTATAATGCAGCCGATTTTGCAATTGATGTTGTTGCCACTGTTGTGCGTGCGGAAAATGAGACTCAAAATAACGGCACGAATGGCTTAATAATAAATGAGCAGCTGCAAATGGTATATCCTGGCTCAATTATTGATGCGATAGACATAAGAGAACGAGTTGGACGACGGAATACCAGCAACAGAAATACAAATACAAATACAAATACAAATGCTTACCATGAACTACTCGCTGCAACTTTAGCACAGCAAGAAAGAGGAGGAGGAAGTGGAGTTGATGATGATGCACAATTAGCAGCAAGATTGCAAGCAGAAGAATATGGTGGAACAACATCGGAAGGCATGGGTGTTAATCGAGACACCGGTAATCAAAGTGCTAATCAACCAAGTCAAAGTACAAATGAACAACAAAATGATTGCACCATTTGCATGTCTGAAATTTCATCAGATGAACAATTCAAAGAATTACCCTGCAAACACAAATTTCACACTGCATGCGTTGATAGATGGCTTGCTCAAAACCCATCTTGCCCGGTCTGTCGCACGAGCGTTGGTGGGGGAGGAAGCGGCGGCGGCACGTCATCCGCACAAAACTCGTCAGGAGGATCATCAAGCACTGATAATCATATATCACCAGTGCGAGGAATACCACCACATGGATACCATCAGCCTCATTATCAGTCAGGAATGGATGACTTTCCTGTTCACATTCCTCCCGATAACTTTCAACATAGTTATGGTGGCATAATGAGTAGCATTGGTCAAGGTCTAACAAATCTTGGAAATTGGGCGTTTGGTGGCTCCAATTATGATACAGAACATTCTCCTCTAATGCGACCATATGAAATGTATGGCACAGCACAACCTCCTCCAATGCGACCATATGCAATGCATGGAACAGCACAACCTACTCCAATACCACGAGGAATGCTCCAACCTGGCCGTACAATTAGTGGAATTAACTCACGCGGAAACCCTGGCCGTGCAACAATTATTTCAACGAATCATTATGCTAGTCCTATTGAAGTGACCATTAGAAGTCAAACTGGACAACAAGCAACTTTAAAAATTTTGGGGTATAACCAGCAAAGCCAAGAGATAACTGTTGTCAATGAACTTGGACAAATGACGAGAGGGATAATTACAGGAGTCAATTAA
>Hetgly06097.t1 gene=Hg85
CTTTTCTTTTTCTTTTTTACTTTTTCTGCAAATTTGCTTTAATTAAAAACCATCTTAATTGATCAATGTTGGCATAATGTGAATTTATTTGGCAGGAAATCGCGAAAATGATGCAAAGCAATCAAACCCAACAAGACAAAAATAAAAATGATGTAAACAAAGTGAATAGCAATTAAAAACCTTACTACTCACCCATCTCTAAAATATAATTGCCCGTATTTTAATGATTTCGAAAAATTATTATTAAATAAATAACTTTACGATTTATAAATTTATGCATTTTAATTTTTATAAAATTAATTTTTTAAATTTTTTTCCCTCAACTATTGCAGATACAATGAATTTTCTTATGATTTCTATCGTTTTTGTGTCGATCGGCAATATTTATCCGGGATTATCCATGCAACAGCCACTTCAATTACAGGAAGAAGTTGTTTTAACTACAACTGAAGCACCAATCAACCGATTACAAATGTCTATGGAAGGCATGGAAATTATATTATAATAATTTAAATAAAATTATTTAGCTCAAACGCTTTCTGATCCAAATGAAGAAGCAGCGATGAGCCGATCACAAGTGCCAGAGGAGGAAACCAATGTCGCTCGACAGCTGCCAGATCAATACAATATCATGATAAACAACGTGAATTATCCAATCAACGCCCCTTATGCAAATATTATTGTTTCTGGCGGACGCCTTATTATCAACGGGGAAGACCGTGGTGTGACAGCGCCTGGAGCACATCTTGATATATCTGCAATTGGAAATATTTATATTTACATTGGAAATGTCGAAGGTCGAACAATTACTGTCATGAATGCAAATCCTCCTTTGGAAGAAGTCGAATGGGAGGCGCATGATCATTTATTATACGATTCGGATGATTCGGTTCACATATCAAACGCCGATGATTCTGATGGTTCGGTTCACATTTCAAACCCCGATGGACATTTATCGCATGATGAAGGAGAGTGGGAGCCATATGAACACTTGCTAAATGTTTCTGGAATTGATGCTCCCAATACTTCTCCGGAAGACATATTGAATGGTGAAGCCACAGAGAATGAAAGAAACGGAATATTTTATGCTGGTGCACCACCTCTATCTACCCTGCCAGCTGACCAGCTACGCCTCTTGGAAGCAGCTAGCGTTGGAACGAGCGTTACTGTGCGTGACAATAATGGACGCTTTCATACTGTACAAGTTCGACAAGTCTAGAATTTCCTATTTTTCCTAGAATTATTTTGCAAAAGATAGTTTATGATTTTATATGACCAAATGTTTTTATTGAAAATCTAGCACTGATAAACGAAATTTTGTTAA
>Hetgly06098.t1 gene=Hetgly06098
AGTTTAGAAAATGATTAGCAAATTATTCATTTTATTTGGATTTCTTGCACATATTGGATTGTTCCATGCTGCTCCACCAAGAACAACAACTTCACAAAATGACGAATCGGACGATAATTGCTCAATTTGTTTGGCCAGCTTAGCTGTTACTGACAATTCTCCGTTGAAAACACTACAAAACTGCAGACATAGCTATCATCGAAACTGTATTGATCAATGGTTACAAGAAAGTAAGCTATGCCCAATGTGTCGAAAAGAAGTAAAAATACCGGACGAATTGCCACCTGATCATAATGATAATGATGGTGGAACATATATAGTAATTGAGGATGGCAATGATGATCCGTCAAATATTCCTATTGAAATTGGTGGAGGAATCGACGAAATTGATAATCTGGAACAACCAGATGAATGGGAGCCTTATGATCATTTATTAAATGATAATCAATATGACCATTCAGTGGATATTACACCAAATGCGCCCTATGATTCTGACAGAGAATCTGATCACTCAGTACAGATTTCAACAAATGTTCCTCATGAAAATGATTACGAATCAGATCATTTTGTGGATATTTCTCCAACCAATTTTGAAGGATTTATAATTCCAATTGAAGGTGATGAAGACCAAAATCATGCTGTTGGTCAAACCCAACCTTCTGATGGTTGGCAGCCTCATGAATATTTGCTAAATGGATCAAACGAATCTGAACGATTGGTTGACTTTTCACCCAATGAATCGCCAAATGCAAATGAAATAGTTCCCATTCCGACGCCTAATAATTCCGCTAACGTTCAAGTTGCGCAAGATAATGATGCTTGGGAGCCATATGAACATTTATTAAATGTCCCAGAAGAAGGCGAGTGGGAGCCTTACGGTCATTTACTGAATGATTCTGTCAATGAATCTAATCATTCAGTTTATTTGTCACCGGAAAGATCGCACGAAAACATAAGCGATGAGCATCTGAATTCTGCTGCTAATCCTTCAAATGTTGAATCGACACAAGCTGAAGGCGAATGGGAATCATATGGACATTTATTAAATGTTCCTGCAAATGAATCGAATAACATTTCGCCAATTCCTACTGGAGATGTGCTTTCATCGGCTGAAGTGAATGGAATATTTTATGCTGGTGCTCCACCTCTATCGACATTGCCACCTGATCAACTACGACTCTTGGAAGCCGCTACCGTGGGATCGAGCGTTACTGTACGCGACAATGCTGGAAGTGCTCATACTGTAAATGTTCGACAACTGTAGAATTTTCCACATCACATTAACGGACAATAGAAATAATCACATGAAATAGCATAGGCCCATCTATACCGTTGATAATAATATTACATTGAAACAATTGCAATATTTTCGCATATTGTTATATATGTAGAAAGTAATTTTTGTATGAAAAGTTTTTGTATTTTCCCAGAATTTAATTAAAAAGAAATGTCAAAT
>Hetgly06099.t1 gene=Hg88
ATGACTATATCCGATAATTTATTTGATGATATTTGGAAGAGGAGCGGCATTTTAAATTTGCCAAGAAAAAGTGAAAATGTGCCGAAAATAAAAGTTGAGCCATTTGACGAGCATTCTTCGGCAGCAGCAGCAGATGCAAAGGCAAATACGAAATTTGGGAAAATAAAAAAAGAAAATTTTGAAATTTTCGAAAAAAATGCTAAAATTAAACAAGAAGAATTTGGTGGCAGCGAATCGCGCCAATTTGGAGCAATTAAAATTAAAACTGAGAATGCTTCAAACACAGAAGTTAAAGAGGAGAACGAAAATTATCGAAATTTGTCCGAAATTTATGAAAAATGGAACAAAAATGAGCATGAAAAGACTGTTATAAGCCGGACAGATCAGCAAAATCCGAGTTTATCAATCTATACGTCATCGAGCACTAATTATGGTGACAGTAATTACACGAATGATGATGGCAGTAATTATGGTAATGATGATGCCAGTAATTACGGTAATGATAATGACAGTAATTACGAAAGCGAGTACAGTACAGCAAATACATATGAAGATGAATTGGATGATAATGATTTTGAAGATCAAAATGAAGTCACAAATTCAAAATCCCCAAAATTTACAAAGAAGGAAAAGCGTTATTACAGTGAATCGGAAAAGGAAGAATTTGTGAGGAAATACAACCAAATTCAGAGGGAAAAGCCGGAAATGAAAGACGAAGAAACTGTTCAAATGTTGAACATACCAAGGCGGACAATATTCAGATGGAGGAAGCAATTAGCAGAAAAAATCAAATTATCCGAAAATGACGAAATGCGTGAAATTGTGAGCGAATTTGAGAGAAGAAAGGAACAATTGGCACAACAATGGGGGAGAGTGCCCGAGAGAAGGACGCAAAATAAAATTGCGAAGGAATTGGGCGTCAGCGCAAGAGCAATTGCATTTTGGAAAAAGGAATTTGGAGAAGAAAAGAAGGACTTAAAAAATGAAAAGCTTCGAATTGTTAACCGTTTCAACAAAATGAAAAAGCAATGGCCACAAATGACGAACAAAGAAATTGCTAATAAAATGGGCATCCGACTGGGCTATATATACGAAAGTCGCCTGCTGTTTCAGCAAAGCAACAAATTTAAATGTCATAATGACGCCGAGAAAAAAGAATTGCTGAAATTGTATGAAAAAATTAAAAAGAAACACCCCGAATTGGACAAAGAAAAAATTGGGAAAATTCTAAATGTGACGGGACGAACCCTAACAAATTGGAAAACCCAATTTTATGGGAATGATTCCAAGAACAAATGTGAAAATGTACAGAAGAAAAAAATGCGAATTTACACGAATTTGGAAAAAATTGAAATAATAGAGAAATTCTATAGAATTAAAGAGGAAAATCCGAGAATAACTGGAAATCAAATGAGCGATATTTTGGGCATTTCAAAATATACATTAGGGCGATGGAAAAAGCAATTCAGTGAAAAAGAAATTTTGTGAACACAAGAAAAGGAAACGTTTATATAAAAGGAAAACAAGAATAAATTAAAAATATTAGTTTAGAAATTTAATTTTTGTGTAATAATTTTTTAAATTTATTTTTCAATTTTTTGCAATATTTGCATTGTTTTTTTTGTTGTAAATTTTTTTATTTTAGTTGTGAATAAAAAAATATTTTATAAATTGTCATATATTTAAAATAAGAGGTGACAAAAAGTGTCCAAAAACTTAGTATTTTTAAGAATTTTGGAAATGAATTGTTAAATGTCGATTATTCTCGGAGAAATTTTTTGTTTAAAAAATCACTTGGGAAAGAATTAAGTACAGCCAAAATTTTCGATGAACAGATACCCAAATCCAAACACGTACTTGAATCCATGTACAAATGGCACCCGGGGATAAAAGGGATCAACCCGAGAAATGCCAAAAACCATTGTATCCATTCATTCACTTCATTTCACATTTCATTAAATTTATAATAGAAATAATTGGAAAATATTATAAAATAAAAGAAAAAATAAA
>Hetgly06100.t1 gene=Hg89
ATGGAACTTGAACAATCTTTCGAACTGCCCGTCTATCCTGACGACGAGTCTCTTTCTCCAGCCAACTCTTTGCCAACAGACACCGTCCCCTTTGGTCCCGATGTCGACGAAGTGCCGGAATTGGGTCCCAACCCGCACGACCAGGTAGTGGAGATGGTAGAAGACGCGGTTTCGGCTGCGTATTCTTCTGACCACGAATTCGAGGTCGAAAGAATATGTGGCCAAAAGCGCGTCAACGGCCACCAACACTACCTGGTAAAGTGGGTTGGGTTTCCCAAGGACCCCAACGATTGGATACCTGTCGGGGATTTGAACTGTGAAGAGGCCATAAATGATTATTGGCAGCGATATCGAGAAGGCAAAGAGTACAGAGAGCGGAAGAAAGAGGAAAAGATGAAAAAGACGGGACAGCGGAAGAGAAAAGTCTCGGGAATGGCTACGGCCGCGGGAGAAAAGGAGCAAAAGGAGGAAAAGAAAGAGGACGAAAAGAAGGGAGCGGAGGAAGAATTGCAGCAACAGCTCCCGATAAATGCTGGGACTGAGGGCACGAATGAAGGAAAAGCAGAGGTCGGGGAAGAAACTGATGGGGCGGAAACAACAGAGGAAGCGAAAAAAGAGATGGGCTCTGCCCCGGGGGAGATGGTGGAGGACGGGACTGAAGGTCGGGAGGATGTGTGTTCAACCATGGTATTATGAGCAGAAAATGAAAAGTCTTTGGCCTCATTAGTTAACCTAATTATATCTTTAATTACTTCTTCAACAACCCTTCGGGAGGCATCCATCTGCTGCTTTTCTTCTTTCGACAAGCAACAACAACACTGACCCCCAATTACCAAGAAAGACAACAGAAATAGTTTTAGAAAAAACATTTTTATTTAAATAAAAAATTAACATTTCATTTATAGACAAAACAAATCAAATTTCATAAATATCAATCAAAGCATAATAAATTCCCTTCTTACCACCATATTCTTTCACACTCACATTAACCTTCAAAGTACAAATGGTCCCAACCAAGTTTTTAACCTTTTCCTAAAAAATAAATAAATTTTTGTGTTTAAACATTTTTCATACCATTCCATCACCCTTTTCTACATTTTTCACGCCGAAAAAAGCAACACCCCCCAAAACGTCTGTATCATCCAAGAGCGACAATCTCAAAAATGAAGACTTTACCTTCTCCATACCACAGTTACACTTCCCCTTACGACAAGAGATGCAAGCCTAAAAATCAAGATATGTTTTCTATTTGGTTTTATTTACATTGTATTCCGTAGACACAACACTTGCAATTTTAGCACGAACCACAAAAATTCGACTACCACAAACCAATTCAATATTCTTAATGTCGCGGATTGTGTTCATTTTTCGAGACTAAAATAAATTTTAGAAAATTAAAAAATTAAAAATAAATTTCGACTATAACTAAGGCAAAAAAAAAAATTACACAATTAATATTTATTATAAAAAGCAATTCGAAAGTGTGATGGCAGTTTTAAAAATTCTTCCATCATTTTTTCTGCAACAATTCGACGAGAAATATCAAAGAGACTTGGAGGGACCCGATAGAGCAACGACCAAGAGCCAAGCAATTCTCTGTAATAATAATGACATATAGATTTTTAATCGTTAAAGACCTGTCCATACGATTAAAGAAAACATTTAGTTGTACTTCAATTGGGGAAGTCAAAAGTTCTTTTCCCCAAGCTAATGCCATGACCTTTAGCATTTGGACCTTTGCCAGAAAAAGACGACTCCTAAAAAAACCGTTGCGGTTTGTCTGGCTCCTTCCCTCCCAGTAAAACCAGAAGAAAAAAATAGGGAGTCCCAATCCCGAATCATTTCCCAAATAGTTCCCCTGTAC
>Hetgly06101.t1 gene=Hg90
ATGTTTGTGAGGCGATACACTGTGGAGAATGCAATCGGAATTTCTACAACAATGATTGTTTCGAGTCTCACAAAAAGACAGCTTGTAGGGAGTACAAGAAATGCGAAAAGTGTGGAGAGACACACAACACAAGGAACAAACACACGTCAGAAAGCATACCGAATTGTGGCTTATGACCTCGAGACGACGGTTGTAGGGGGCGAACACAAACCAAATCTTGTTAGTGCCGCGCATACTTGTAGTGTTTGTGTGGGAGAAGAGAGGGAATGCGAAATTTGTAATGGTCCGCGGATGATCACTTGGTCTGTAGCAGATGGGTTTGAACCGATGAGCGAATTTGTTGATTGGATTTTGGGATTTAAACGATTTGAAACGGTTGCTTTTGCTCATTATGCTGGAAGGTTCGACTCGCATTTTGTGTTAAAAGAGCTGACTGAAAGAGGGGTCGAAACCGAGTTGATGATGGCAGACCTGAAGATTTATCAAATGAAAGCGCGTGGAGAGCAGCTCAAGGTTTATTGCGAAAATGACGTCGAAATTTTGATGGAGGCAATTTTGAAATTCCGGCAATTGTTTTTGGAGATTACTGATGGGATGGATGTGTTGAAGGACAGCGGTTATGAGAGAGCCGAGAATCAGAGCAAAATTGCCGTGAAGTATTTTGAATGGTTGGCTCAAAGCAAAAGAGTGAGACTTAGACATGCATGCAATGGGGGACCCAATGGGCGTTGTATGGAAGTAAATTTCCGACGAACTGAGACACGAATGGAGTTTTTGAGGGAAAAATGTAAAAACTTCTCGGTGGAGGAAGTTTGGGAATGCGATGTGAAAGAGAACTTGAAAAAAAATAGGGAGATGAAGAGGTTCTTTGACGCTGTGCCGGATAAGGGTCCAATAAATCCGAGGGATGCTTACGCGGGGGGACGGACAATGCCTTTTTGTTTGTACGCAAAAGCAACCGAAGAAGTTGAGATTTCGATGTTCGATATCATAAGCTTGTATCTGTTTGTGAATTATGACACCCCTTATCCGGTTGGGGTCCCTAAAATTGTGGTGAGCAGGGAATTCGATGTGAATTGGACGGTGCCCGACGATGTGCCCTATGATGGCCTGCTAAAGCAATTTGACAGTCAGCTGTTCAAAGGATATGTGCGCATGTTCTTGAAAATAAAGGTGGAGGCGTCGGGCTGGCCCTCGGAGGTGAGAAATGAGGAGGAAAAAAGAGCATTCATCGAAATGTACAAGGCCAAGTACAACATTTGGCTGGAATATGATAAAATGGTGTTTAACCCTGGGCTACGTATGATCGCTAAATTGGGATTGAACAGTTTATGGGGGAAATTTTCAATGAGGAACACACTTTCTGTGACTGAGATTGTTAATAATTTGGAAAGATGGACGGAGCTCATCAAAGATGACACGATTGAGTTTAAAAGACCGATTGAGATAAATGAGGGTGTGATGAGAGCAATATACCAGAAGAAGCAAGAGTTTATAAAGGAGCATAAAGTTTCGAACATAATTTTGTCATTGTGGACCACGAGTGCTGCCAGGGTAAAGCTGTACGAGTATATGGAGCAGATTCTCTGGCTTTTGCTCATCCGAAGGGTCTGTGTCCTTTGGAGGAGGGGAAATTTTTGGGACAGTGAAATTTTGGAGTATGTGTCGGCGGGTCCAAAACAGTACGCCTTGAAAATGAGGAGGAAGAAAGATGGTGTGATTTGGCATAAAACGAAGATACGGGGGATGACGTTGGACAGGAGGAACGAATTCAGCTATGAATTGTTCAAGGACATGGTGTTGAATCATCGGGATGGGTTCAAAAAAGTGTTTCGTTATCCTGAGAAAATTGGGCCGACAAGGGATTGTCGAGTCCTCTCGAGGGATGTAATGAAAGAATACGAGCCAGTGCAGAAGAAGGGGATAATTGATGTTGACTATAATGTGTTGCCTTTTGGATATCATTAA
>Hetgly06102.t1 gene=Hetgly06102
ATGTTCGATCCATCCCAAACCAATCACCAAATGCCATTCAACAAAGAGGCTGTTTCTGATTTTTTGAAATGGCGCAAAGACTGGCACAACATGCAACGCAGCCGACGTGACCCAACTCCACCAACATCTCCCAAAAGAATGAGGGCCCCAACTCCGCGACCAATCGTTGGACTACCAATTCCTGTTGTGGAGGGCAATCGGCCGGCGGAAGATGTAAGCTCAGACGATGACGACGGTGACGGCAATGCCGCCCACCAAAACATTGTGCAAAGACAGGAACTGGACATTGGCGCACGAGCTGTCCAACGTCCAATTGCCCGGGTGCCGCCGGCATTTCGTCAAGGCCCTGTTCGCCGCCCCTTTCCACCACTTCTACTGCCACGTCAGGGTCCACAAATGCCACATCGTGTATTCCCAGTCCCGCACCACCATGTCCAACACCCTCTTCTCCACGTCCGACCACTTCCTATGCCCCGTCAGGGTCCACCAATACCATACAACGCCCTCCGTGCCCCACAACACCCCATCCGGTTTCCAATTGTGAATGTTCCGCCACTTCCGCTGCCCCCTCAGGGACAACCAATGCTGCGTAATGTTGTTCCTGTTCACCACCACCATCATCCAATCAACGGCCTACCACTTCCACTGCCCCATCAGGGGCCACTGTTGTTGCGTCATGTTGTTCCTGTTCCACATCACCATGTCCAACCTCCACCGAATGGTCTACCGCTTCCATTGCCTCATCAGGGGCCACCGTTGTTGCGTCATGTTGTACCTGTTCCGCATCACCATGTTCATCATCCAATGAACGGCCTACCACTTCCACTGCCCCATCAGGGGCCACCGTTGTTGCGTCATGTTGTACATGTTCCGCATCACCATCATCCAATCAATGGCTTACCACTTCCACTGCCCCATCAGGGGCACCAATGTTGCGTCATGTTGTGCCTGTTCAACATCACCATCATCCAATCAACGGCCTACCACTTCCGCTGCCCCATCAGGCTCATCTTGTGCCGCCCCAACCATGGCATTTCCCACCTGTCATCGTTCGCGTCCCGCCCGTCGCACAAAGGAACGAAGCTCTTCAAGCGCCTCCAATTGTCAATCCGTTGGGGCAAAATCCACAGCAAATGA
>Hetgly06103.t1 gene=Hetgly06103
ATGGAACTTGAACAATCTTTCGAACTGCCCGTCTATCCCGACGACGAGTCTCTTTCTCCAGCCAACTCTTTGCCAACAGACACCGTCCCCTTTGGTCAAGATGTCGACGAAGTGCCGGAATTGGGTCCCAACCCGCACGACCAGGTAGTGGAGATGGTAGAAGACGCGGTTTCGGCTGCGTATTCTTCTGACCACGAATTCGAGGTCGAAAGAATATGTGGCCAAAAGCGCGTCAACGGCCACCAACACTACCTGGTAAAGTGGGTTGGGTTTCCCAAGGACCCCAACGATTGGATACCTGTCGGGGATTTGAACTGTGAAGAGGCCATAAATGATTATTGGCAGCGATATCGAGAAGGCAAAGAGTACAGAGAGCGGAAGAAAGAGGAAAAGATGAAAAAGACGGGACAGCGGAAGAGAAAAGTCTCGGGAATGGCTACGGCCGCGGGAGAAAAGGAGCAAAAGGAGGAAAAGAAAGAGGACGAAAAGAAGGGAGCGGAGGAAGAATTGCAGCAACAGCTCCCGATAAATGCCGGGACTGAGGGCACGAATGAAGGAAAAGCAGAGGTCGGGGAAGAAACTGATGGGGCGGAAACAACAGAGGAAGCGAAAAAAGAGATGGGCTCTGCCCCGGGGGAGATGGTGGAGGACGGGACTGAAGGTCGGGAGGATGTGTGCAAAAAAGGGAATTTGGAATCGGCAGATGTGGGACTGGAGGTTGAAAAGTTGAAGAAAATGTTACGCGACAGTGGCCAAATGGCGACGGACAATGCCCCACTTCCCCTACCTCGATGGGTGAAGGGTTGGCAGCCAACGCAATGGGCAGGAGGAGATGGATTTGAAAGTGATGATGAACAATTAGCAAGAGAGTTACACGCGCAAGAATTTGGAAGATCAGAGGGAATGGTCCACCAAACGCCAATGCCTCACTACATAGGACAACCACCTCCACAATTCCGACCAATTCAAATGGCTCATTATGGGGGACCACCAGCAGCACAATGTAAAAAGCAAATATAA
>Hetgly06104.t1 gene=Hetgly06104
GGCAATTGATTCACATAAAAATTATAAATGCATAATTTTCCTATATATTATATTTTATTTTAAAAAATATAAAATGAAAATTGTACAATTCTCTATTTTTCTATTTATTCTTGTCTTCTTTGACATAATTAAACTATCGGAACAAAGAGAAGGAGCAGTTAGAAAAATTACCAACAAAATAAAGGACGTGTTCATTAGCAGCAGCAAAACAAATGGAAGTGATCGTTCAAGAAGCAAAAAAATTGATCGAAATCGTTCAAGCCGTAAAAAAAAGGAAGACAGAAAAATTGAAGGCGATTGTTCAATTTGTATGGAGGAATTGGGATCCAAAAAGATATCTAAATTATTGCCATGCAAACATGGTTTACATTTGAAGTGTCTTGATGATTTGAAGAAAAATGGGTCAAATAAATGCCCAGTCTGTCGGGCGAACGTGGACACAGGCGCACCTGAAGGTGCACCACCGCCATTGCCGAGAACCAATTCAGCCCCAGCTCATTTGGCAAGAAATGGTCAAAATAACTCATGGAACCAATCTGGAGGATCTTTTCCTGCTGAGCTTCGAACACACTCACCTGTTGAATGGCAGCCAACGCAATGGGCAGGAGGAGATGGATTTGAAAGTGATGATGAACAATTAGCAAGAGAGTTACACGCGCAAGAATTTGGAAGATCAGAGGGAATGGTCCACCAAACGCCAATGCCTCACTACATAGGACAACCACCTCCACAATTCCGACCAATTCAAATGGCTCATTATGGGGGACCACCAGCAGCACAATTTCAACATAATGCTCCATATCATTACGATGGTTATGACCCGAATGATTTCAGAGTACGTGATCTGAATCCCGGTAGTGGCTACAATGCAGGCGATATGGCAATTGATGTCATTTCTGGCTTATTTAATGGAGCTGCTCGTTTGGGCTCAGCCCTTTTATCGGCAGGAACACAGAACAATGACCATAATCAGCAGAATTACAATGGACGTCAATTTTCTCGTTCAACATCTTATCGTTACCGTTGATTTTCTGAAGAAAACCTTTGATGTATCTTTTTTTAAATTTATCTATTCTTTCTTTACCTTGTTTTCTATCATTTTTTGCCTTTTTTCGCATAAAAAACATTTAGAAAAA
>Hetgly06105.t1 gene=Hg93
ATGCTCGAAATTTTCCTCATTGGCCGAGCTATAAGCATAAAAGCGCTTCTGAAAATTGGCAATAATGATGAAATAAAACAAGGACAAGCATCAATTCCTGCTGAAAAATTGCCAAATTGCGAACATCACATACATCTCAAATGTATAAAGCAAGGCAATTTCAAATTACCTGCAAATGCATGCCCTATATGTCGTGCAGAAGTATCAGAGAATTTCATGGGGTTATTAAGAAAAAATGATCAGGCAGGTCGCCCATCAAATTCAAAAACAGAACAGACGAAATACGATCGGCAAATTGCTCTTAGCCTATCGCATTATGATGATTCAACGGCAAATGACGCGCAAATTGCGGAAGCCATGGATAAAGCGTGGCAGGAGCAAGCGGATGCCGAATTAGCTAGACGATTGGCTGATCAACTATAG
>Hetgly06106.t1 gene=Hg95
ATGTTTTGTGTGATTTTCACCGCTTTAATGGACACTGACGCATTTTCAAAACCGTTGGGACTGATTTCACTGACATCAAAAAGTTACAATGCCCAAGGCATTGTCTGCTCATATTATGCCATTTTGGCGTTGCTGATCATCACAGCGATTGGCGATGTGTGGGTGAAAGAAAACTTGACTGTTATGCGACTGGTGCTTCCGCTAGTCATTTCTTACGCAATTTTGTTTGGCATTTATTTGCTCATCGGCATCATTTTACGTCGATTTCGTGTCGTGATGTCGGAGATTAATTACGTAGCATTTTACAATACGGCAGTTACTCTTTTGTTGCTGCACTCAGCCGTCACATTGGCAATTTATATTCAATTTGTCAAAATTGCATCCGCAAATTCGCGCCGAAGAGAATTGCGGAAAGATCGTGCTGAGAAATTACCAAATTGCGATCATCGCATACATCTTGAATGCCTAAAGGCTGGCCTTGACAAATTATCTATGTGCCCATTATGTCGTGCAGAAATAACAGACGATTTCAAGAATTTATTAAGCGGAAAAGATCAGGCAAAAGCAGGCCCATCAAATTCAAAAAGAGAACAGACGGACATGGATGAACAATTTGCACGAGCTCTAATGTATGTTGATGATGATGATGATGATGATACAATTACACATGGCGTTTGGCTGATCAACTTTAGGATTTTTGACAAATTGCGCAATTCTCGAGCACTGATGAACACAATGGACACTGAGATTTTGAAAATGAATTGCGCTCTTGAAAAAAACTTTGTTTCTGATCCGTATTTTCGTAAACCTATATGGAAAGTCTAA
>Hetgly06107.t1 gene=Hg96
ATGAATTTTTCTGAAGCTAATCCAATAATATTTGCGCTATTTTTGGAATATAAGGATGAACAGCCGTGTTGGCCAATCATAAGCTGTGCACTGTTGCTGAGTATAATTGCATTTTTTGGGTTGATCTTCAATACGGCACTCATTTACGTCACAGTACGAACGCGAACATTAAATAGCCCGACAAATCGTTTATTGGCATTTAATGCGGCCCTCGAAATTGCGCATCAATCATCGTATTTCACATTTTTGTTCCTCAGTTTGACCGGCCAAACATTCATTGACTATAAATTGGCCGTTAAAATTGGCACACTTTCAATCATTGGTTATAATG
>Hetgly06108.t1 gene=Hg99
ATGATTTTGTTTGCCAACATTGTGTTCATCCATTTCATTCATGCTTTATTTTGGGCAGCTTCAATTTTGCGCTATAAGCCAAATTACGCTTTTTTCATTTTGTTACTTTGGCTGGCATTTCTGCTTGGTTCTCCGTCCTACATTTATTTGGTCGCCTATTCTGGCATTCATTTTTCAATTATGGCGGAACGTTTTCGCGCAACAGTTTTTGTACGGAATTATGAGAATGAACGATTTACTTTTGGGTGGATTTGTGCGCTAATTTCGTGGTCCGTCTCATTTGTGTACATGTTTTGTGTGATTTTCACCGCTTTAATGGACACTGACGCATTTTCAAAACCGTTGGGACTGATTTCACTGACATCAAAAAGTTACAATGCCCAAGGCATTGTCTGCTCATATTATGCCATTTTGGCGTTGCTGATCATCACAGCGATTGGCGATGTGAAAGAAAACTTGACTGTTATGCGACTGGTGCTTCCGCTAGACATTTCTTACGCAATTTTGTTTGGCATTTATTTGCTCATCGGCATCATTTTACGTCGATTTCGTGCCGTGATGTCGGAGATTAATTACGTAGCATTTTACAATACGGCAGTTACTCTTTTGTTGCTGCACTCAGCCGTCACATTGGCAATTTATATTCAATTTGTCAAAATTGCATCCGCAAATTCGCGCCGAAGAGAATTGCGGGTTGAGCCGACAGCAAAACTTACTGAAGAATATTTCAAACAATTGGCAAACCAATGGAAATAA
>Hetgly06109.t1 gene=Hg101
ATGCCATCCGATTGGAAGACGGAAAATGAACCGTACATTGAGCGGCATGTTCGGCTCAATGGAAAAGTGCACAAAATGGTAGTCGACTCCGGCTCAAAATTGACAATCGTGAGAAAGCTCATTTGGGTCAAATTGGGCCAACCGTTTCTCACAGAAACAAAGCTCAAGGGTCGTTCATTCACAGGGAACATTTTCACATTTATGGGGATGTTCAAGGTCCAAGCAGCATTGGACGATGGAATGCCCCTCGATTTGGAATGTTTTGTTATCGATTCGAGGGACACACTCGATTTGATGGGACTTCCATGGATAAGAGCATTTGAACGCGCCTACAACCAAGTGGTGGCGACAACTTTGTCAATCGAAAATGTTGCCGACAGTCGTTGGCCCGAAACCATTCCAAAGCAACAACATCACGAACACACGTCCAAAATGAAATTGCAATTTGACAAAAAGCACAATGTAAAGCCGGTACAGTTTAAAATTGGAGAGCAAGTCCAATTTCTCAATTACCGAAATGGCAAAACACTTTGGCTTTTTGGGCGCATTGTTTCAAATAAAGGGCTTATTTACGAAATCCGTTCCCCTCAGCTTGGCAATCGAATTGTCACGCGTCATGCCAACCAAATCCGAACAACAATGGCACAGAGAGGGGACGAAACATGTCCGGTCGCCGATGACATCATCTTTGCGAGGGAGGAGCATGGAACTGGAAATGAAACGACGGACGATCAACAGACAAACACGCAGCCACAACAACGGGCAGCGCAACAAGAAGAACAAGGGCAAAACCAACAACCACTTCCTTTGCGTCGTTCCGAACGAACGAGGAAACGTGTTCGTTTTCTTAGTTCGACGCACACTGGACAGAGTTACGATCACTGA
>Hetgly06110.t1 gene=Hetgly06110
GTTTTTAAATAATTGAAATGGACACCGATGATCCTATTCTGAAACATATTTCACCAAATTCACGTGCATATGTTGTTATAATTGCAGGAATTATTCTGCAATTCACTTACGGACTCGTGTACACATTCGGGAATTTGCTCCCATATTTGGCATCATATTTACGCTGGAAAGTCGATCCTGAGTTAAATGATGGCACATTAATATGGTTTCAAAGTTTGCTCGCTGGATTTCCTTTCGCTTTTCTTGTCGGTGGTTATCTTGAGAAAGTGATTGGCGCACGATGGGGAGCAGCATTTGGCTCATTTCTGTACACTTTGGGAGTGGCACTTTCTTACTTGGCCATACAAAAATCATATTTTTCATTGTTCATTACACTGGGATTTTTTGCTGCTTTTGGCCATGGCGTTGCATACAATTGTGTGTTGACACAATGCCAGAAATGGCTACCTCATCGTGTTGGCCTCGTCAGCGGCCTTATTACTGCTGGTTTTGGCAGTGGTGCCTTCATAATGTCACCAATTCAGACCAAATACATTAACCCTGACAACCTAAACATTGATTCTACAGGTTATTTTACACAACCAGAATTGCTGGAGAGAGTGCCAAAAATGTTCCTTTTGTTGGCCACCATCTTTGGCACATTGCAATTTGTTGCATTATTTTTTATTGCAGATCCAAAGCCAAATCAAATGTTGTTGAAATGTCAATCTGATCAGAGCGATAATTTTGAACAAAAGCCTCTAAGAATGGTCCATGAACCGCGCAATTCGGTGGCTTCATGTATTTCATACGCAACCACAACACATTATAATGCTCCAACCCATTCAAAAAAGGCGATTTTATGCTCTGACACATTTTTCTTCTTATTTTTTACACTTGTGCTCAACGATATTTGGACACAAACAATTAGTGGATTTTATAAGGAATACGGACAGACATTTATCCATGACGATTTCTTTCTGGCCACAATAAATTCATTTGCTGCTGTTTTTAACACATTTAGCCGAATTTCGTGGGGTGCCATTGCGGATAAATTTTCTTATCAATTTTCAATGAGCATTGTTTGTACCGTCGGTGCTGTTCTGATGTGGACATTGGGTCTGGTCAAACTTTCGGGAGTGCCGGCATTATATTTTATTTGGATTTGTGCCATGTTTTGCAGCGTTGGCGGCACTTTTTCGCTTGTTCCATATGCAACACATCGCTGTTTTGGTTGTGATAATTTTGGCTTTTCATATGGTTGCCTTCAGATGGCAATGTTTTTTGCCGGTGTTCTCAACGCATTGCTTTCACAATTTCTAGTCAACATTATTGGCTTTCAAATTCATTTTACAATTATTGGCTGCACAATGTTCATCTCGTTATTGCTCACCATATTTTTGTCGAGTACCCAATTTGGCCAATTGGCAATTTAATTTTTTTTTTATTTGAATTTTGACGAATTAAAATTCGATTTTATAAATTGTTATTGGAT
>Hetgly06111.t1 gene=Hg107
ACAAAACAAACAAAAATTGCCCAAAAATGGAAAATTGTCGATTTTATTTTGTGCGCGAAAATTGCTTTGTGGACAAAAAGCGCGCGACAGGAAAGTCCGACAAAAAAAAAATTATTTATTTGTCCATTACCGCAATTATCAGCAGACAGCAAAGCACTATATAAATTGGTGAATGTGCGTAAAATTAATCAAAAAATAAATTTAATTAATTAATTAACTAATTAATTTTGTCTCGAAAATGGCAAGAAAATTCATCGGATTGTTGTTGGTGCTGAAGCTTGTGCATGCCCAGTGGGACGGTGGCATGAACGGTGGTGCACCGATGGGCGGCGGAATGGGTGGAGGAGGAATGGGCGGCGGAATGAGTCCCGGCGGCATGGATGGTGGTGGCATGGGTGGCGGTGAGATGACGCCGATGTCCGGCGGTGGCGGTGGCATGGACGGTGGGATGGGCGGTGGTGGAGGCGGTGGCATGATGGGCGGTGGCGGTGACATGGGAGGATACGGCTCATCGGTAAATAAGCCGCCATGCATAGCCGGACGAGTGGAGAGCTCAACACCAGCGGTTGATGAATGGGAAGGCCTTTCCTGTGGTGGATTTGAGGGGGGCGGAATGCCAATGGGCAGTGGCATGGGCGGTGACAATGGCGGCATGGGCGGTGGAGGAATGAGCGGCGGTATGCCAGGCGGAATGAATGGTGGAATGGGTGGCATGGGCGGAGGCGGCGACATGGGAGGCTACGGCTCCAATCAGGGCGGCGGTGGTTTTTCAAACGGAGGCCCAAGCGGTTTTGGAAGCGCAGGTGGAGCCTCCGGGATGATGGAAAGCGCGCGCTACGTGCAAAGCGCGCAAGGCTTACCACCCATTCAAATTCCGCCATATTCGGCGGAGGAGGACGGGCCTGGGTCGGCTGGCCACAAAAATGCAATGCCGCCAATTCAAATTCCTCCGTACAGTGCGGAGGAGAGTGATGATAAGAATGTGAAGTCGATCATTAAGCCGTTGTTGCCGGGCAATTAGTGGGACTAATTAGCCCTTCTTTAAATAGGCAACAAAACAATGGATTGGATTAACGGGTTAAGTGAAAAGATGTTTTGTTAAAAGCGGTTTTTTGAGGGTAGAATAACGGAAAATATTTAATATATTTATTAAAAAATAAAAATTTAAATCATATTAAATAAAAATTTATCAAAAAAAAATATTATTAATTTATAAGAAAAAATAAAAATTTTAAAAATATCTATTATAATAAATTTATTACTAAATAATTCATTTAAAATTGATTAAACAGAAAC
>Hetgly06112.t1 gene=Hg108
ATTAAAAAGAATATTTAATTATGCGCCTAATTTTCTTTATTGCCTTTTTCTATCTTCTTGCTTCCCATCACAAAGAAGCGCTTGCAAACTCCGTGCCAAAAAAGGCTGGCGGATTTGAGGAATGCCAACGGAAAGCTTGTCAATTGAGTTGGATTGCACCTTCGCCTTCTCGCATTGTTCAGTGCTGCAAAGATTATGGAATTCATGAAAGCAAATGCACATGCCCTCCATGACTCAATTTCAAATTTTGAACAATTTTTAAATATTTGTTGGCTTAGACATACTATAGAAAACTCACAAAATTGTTAAAAAAATATATGTTTAAATATTTATCGTCTTA
>Hetgly06113.t1 gene=Hg110
ATGTTAGACTCAGAAAATTTGGACATAAGCATTGATGAGTGTCAACAAATTATTAAACATCGAAGTTGTAGCCTAGGCGTTCTCAAAAATCAAGCTAATTTTTGGCAAACTGAAAATAGCATTGACCTAACTCCGAGAATGTGGCTATTTGGGTCCTTTGCTTGGAAAAATGTGTCAAATGAAAATTGTTTTCTTTTTGAAACCGAATTGACTCACACTTCGGTGGTTCTTCAATTGTTACTCCACTTGGGTCACCAAATGAGTGTCCTTATGAGAAGGGGAGTTGTATTTTGGATGAAAAACGGTAATCATTTGGAAAGAATAAAAACGGGAAAAACAATGGGAAAAATTTGGCTTTCTGATGATGGACAGCTTGTTCTTACCTTCGGGAATTCATCAAAGTTAATGGATTGTGGACAGAATATTACTATCTCTGACCAGGGGTTTGGATCAACTATTGTGCTGGCACCTGAGTCTCATGATTTTGGCTGCTGA
>Hetgly06114.t1 gene=Hg111
ATGGAGAAAGTGAGACCTGAGTTTCAGCGATCGCTTCAATTAGTTGGGCCACTCATTAGGAGAAAGAGTTTTGACAAACTCACAGCATACATTCAGGAATTAGAGGTGTCAATTGAGAAAGACACTAGGGACAGCTTCGGCATTCATGCAATAAGGCGAGGTGGACATTTTAACCGAGATAGAAGAAATTGGGCACCACAAAATGACAGAAGATGGAATAGTCGACCATACTGTCACTTTTGTCGACGTACCGGTCATGAACAGTACAATTGTAGGGAACGACGAATGAATTTTAATGGGAATCAAAATTCAAACAATTCCCGGTGGAACCAACAAAATAGAAATTGGGAGCCAAACCAGTTGAAACACAAAACTGAGAGATTAGAAGGGATGATTGAAGACTTAGCTGTACAGATTCATGAGATGAAAATGAGTAGAAATTTTGCTTCGGCAGACCAACAGAATGTTAAATCGCTCCAACCGATGGAAATTTCAGAGGGGGAAAGCCAATCAAAATCGGAACACATCAAATCTGAACCCAAACGAATTAAAAGTTGGGAGACCAAGGTTAATTGGGTGAACAAGGCATTAGTTCCTTCTAAGCCAATGATTTGCCAAACACAGAAACAGTCAATGATTTGGGAGCTTCCAAAAATGCCAAGTTGTCTGCCTCTCAGTCTAGTAACTGAGCACACTCCTGTGGCTCAGGACAGAGAGTTGTTTATTCCAAACAGCATCGAATTCTCTACTAGAGCTCGGACTTGTAGAAAAATTAAGAAAAATGCCAGGAAGTACACAGCACTTTCGTGA
>Hetgly06115.t1 gene=Hg112
ATGGAGTACACAGACCTTGCGTTCTGTGATAAAAGGCTTATGGAAGGCAAACATATGAGTGCGCAGGCAAAAATCAGTGACCTTTCTCGGGTCCATGATGATGTTATTGTGGGCCGGGTTAGTGACATCGAAACCGATGTGAATACGGGTTTTGGCACAACAGCGGCCAGGGTTGACACACTTGGGGAAGTAGTTACGGGATTGGAACGTAAATTTGACACATGGAAAAATGAACTTGAGTTGAGAGAAAATATGGAATTCGATGAATTGAATCGCAGCAGTGGGGCTCAGAAAATCTTAAGCTTAGGCAAGCAGTTGACTTCGCCAAGGCCTATCTTTCCGCCAACCCCAACCCCACCCCCAACTCAAAATGCAATTAATAGCTTTGGCATTCTTCAAAGTACATCTAATGTACAAAATTCGAATAATACCGCAGGCGATCCTGCAAATGGCTCCATGACTAATCAGTCGAGACTCATTTCAATAAATGAGTCAGGGGAAGAAGATGATATAGATGGTGACCTGAATGCCCTAACTGACATGAATACGTCCAGTACACAGCCTGGAGTGTTCTGTGGTGAACTCGCTTCGGCATTTGATGACTGGGAAATTATTTTTGAGAATTTATTGGCTGTTGAGAAAAATACTTTGGCAAATGCACTCAAACATATTAGAACGAAGTTGGACAGCCCTCACTTTAGGGAATTGGCTTATAGGAAATTAGCTGCTTGTTATCAAAGGGAGGGAGAATCAGTTAGTGAGTTTGTGAAGCGCTTGGTTCCTTTAGTGCACACGACTTCGGTCCATATTCCGTCTAATGCGCGAGAATAA
>Hetgly06116.t1 gene=Hg113
ATGCGAAACCAACGCAGGACGACCATCGACATGCGCTTTGTCCTATCACTGCTTTTTAGCGGAGTCCGACATGAAAAACGGTTGATTGCTTTGGAGCACCTCAAATTGGGAAAGAAATATATCAACCAATGTGTTAAAGTGCAACTCATCCACGGGCAACTCATCCACGTGCAACTCATCCACGTGCAACTCATCCACGGGCAACTCATCCACGGGCAACTCATCCACGTGCAACTCATCCACGTGCAACTCATCCACGGGCAACTCATCCACGTGCAATTCATCCACGGTCAACTCATCCACGTGCAACTCATCCACGTGCAACTCATCCACGGGCAACTCATCCACGTGCAACTCTCTAG
>Hetgly06117.t1 gene=Hg117
AGCATCCCAAAAAATCACTAATTTGACAAAATGATGAACAACTCATTTTTCCACCTTCTGTTTGTGCTGCTGTTTTGCTTGTCTGTGATGCTTTCTTTTGCATTGGGAGAACAATGTTTATCAAAAGAATCGAAATCGAACAAAAACAATTTTCATAAAAGAATGCAAAATAAAAAAGGTATATTAATAAAAAAGAATTTTAATTTCAATTTTAGATTCATTCGCTCCACAAATCCATAAAATGCGCAGTAGCCTGCCTATCAACTGGTCCACCAGCTTTGGGCAGAAAGCAAACCAGGAGAATCTTCAACAATTGGCGCACCGAGGCATTTACCCGGGCATGCCCTGTCTGAACATGCCGGTTGCTGGTTTTCAGGGCGCATTTGGCACACCGATTGGTGGCCTCCCGGCAGCAGTTATGCCGTCACTTCCGCCAATGCCAATGCCAATGTGCTCACCGCCGACGGCACTTTGTGCGCCGTCGTTAGGTGCCGCGATGCCGACTGGCGCGGTTGCTCCACCGATGATGAACCTTGCGCAACCCGTGCCACCCTCACTGGCCCCAATTGTACCACCACCACGAATTTTGCAACCTCCACAACCGGCCATGGCCCCTCCGATGCAACTCGTCCCGGTGGCTATGTGTGCAATGCCGTGCCGTAAAAAGGCGCCGTGCCGAATGCCAATGCGCAACAACGGCAACGGCAACAACAACAATTTTTGTGACTTCTGTTGTGGCCCGTGCTGTTGTCCGCCATGCGAAGACGACATTTGCCTATGCAGCAGAAGACGACGACGATGATTATG
>Hetgly06118.t1 gene=Hetgly06118
ATGACATTGGCGACGCCTCTGATCGTTATCCATCTGAACAGTGATCTCATCCGAGTAAATAACAAATTTAAATTGAAGTGCTCTCTTTGTTCTGCTGGCAATTTGTTTGACAACTTTTCTTGGCAACTCTGTGACATTGTCCATCAACGACAGACATTCCATCGACTGGACTTGAAAAATTGGTTCAACTTGGAACGACGATCGACAAAATCGGAAGTTCCGACGGCAGATTTTGTTGAAATTTTGGCACTGCAGGAAAATATTGAAACAGAAGGACGAACGAAGCACTAA
>Hetgly06119.t1 gene=Hg119
ATGCTCCCCTCTCCAAGCCAACCGTCCACACATCTGCGGCGCCTAGAGCTACAGCAGCCACATGGACATTTTCCTTGCCCGGAACCGGAATGTGAACAAGTCTTGGACTCCAAAAAAGGACTGTCAAACCACAAGAGATCACATAAAGCAGGCACCTCAAAGGAACCGCGGTCGCGCAGTGCCGGCAGTGCCGCTGCTGCCCCATTGACGCCTCGTCAGCCAATTTTGGTCAATCTCGATGTGTCGGGTCCGGAAGAGTTTTTTGCTGAAGATCATCAGGTGCAACCGGTCGCTGCTGACGGAATTCGTCGCCAACAATCGCCGGCCGAACATGCCATTGCTGGCTTCACTTCAGCATTGGGTGGAGGCGGCGGCAATGCCAATGGGCCAGCAGCACATGCTGGATTACCTAGATTTCCTGTCATGCCAAAGGGGCAACGGACGCGCAGCGCCACTGAGCCAAGGAGGTCTCGTCGGATCGCGGCCAATGCCAACGCAGGCGCCGCCAGAATTTTCACCACCTCTACCCCCACCGCTGAGCTATGTGGCAAACAACGGCGGAGCAATAAAAATTCGGCATTTTTGCGTGGCGCCAATGAGGAGTTGTCGCCGCAGCTGCTTGACGAGATAATGGCGAATGAGGCACTTCGGCGCGCCAATGAGGAGCATGAACTGCGCGCCAATGATGAGCAGGAAACCGAATCATCAGACGTTGATGAAGACGAATATGTGGTCGAAAGCGATGACGACATCCCGGCGGTTGAGCCCAAAGAGCGTGAAGAGCGATGGGTGGACCCATTACCAGAAAAGTTGCAATTTCAGCAGCAGGTGAACAAAATTGCCGAGCTGAAATGCAAATACTCGCGGGCCAATGCCAAAGTGCACTGGTACAAGGACCGAAAGAAGCTGTTCTCGGACGGTCTCAAGTACAAAATTTTGATCGACAAACAGTCCGTCACGCTGATCATCAACAACCCGGACCCGGACGACAGCGGCAAGTACACATGCGAAGCGAACGGAGTGCCCACCAATTCATTTGTCACTGTGGAGGACTCACCAGACCAACAACCATTGTCCTCCACCGCTCGTCGCCGCGACTCGCGCAGACCGAAAAGTGCCAGAAAGAAAGCCACTGCATTGACCCCCTTGGACGCCATGCAGTGTTGCAGCAGCCATTTGACGCCGCCACGTCCCAAAAACACGGACCTGGATACATCCGGCACACCGGCACCATACCAACCATTGTCCTCCACCGCCCGTCACCGCGAGCCGCGCAGACCGATTGACATGGCGGCGATTGAGGTGCGCTGCGCGGACGAACCGCTGCTGGCCAAGGCGCCATTCAATGTGCCAGGGCGGCCCTACCCACCGGAGCCACTGTACACCACCGACAACTCAATCATGCTCAAATGGGAACGACCGTCGCTGGACAGAGGCACGCCGATTACTGACTACGAGCTGGAAATACGCGAGCGTGGCACCAAGCTCTGGGAGAAGGCTACCACCACCAACGCTGCGCTATGGGAGAAGGAAGCATTTGGCAATGTGCCGGACACACGAATCAAGGTGACCAGCGTCAAACGGCAGCAAATCTACGAGTTCCGCGTGGCTGCAGTGAACGCGGCGGGCCGAGGCGAGTGGAGCAAGAACTCTGTGCCAATTGCTGCCACATGGTCCCCCTGTAAGCCGTTGATCACCATGGGACCGTTGGCATGCGACATGACTGTGCTGGTGGGTGAACAGGCCAAGCTGCTGGTGCCCTACGCAGCGAATTCTTCACGGCCGAAATTCGTTTGGAGCAAGAATGGCAAACCGATGGATCCGCGTGACGACCCACGCGTTAAGGAGGAAAAAAGCGACATTCTCATCCAGCTGTGCTACCAGAAATGCGAACAATCGGACACCGGCACCTATTCCATTCGCATTGTGAACGACTTGGGCTCGGATTCGGTGGACTTGCGCCTGAAGGTGGTCGATCGCCCTGCACCGCCCGAGGGGACATTGAAGGAGCGGACCGCGTCTAGTAGCGGAAGGCGACGCGTTGGCAGTACAGCGGCGGATCGGTCGGCACAGGCGGCAGCAGCGGCTTGCGCTGCGGATGAAGAGGCAACGGACGAGGTGGACAACAACGAGGAGGAGCGACAGGACATGGCGGTGGTGACAAAAAGGATGGCAAATTTGACGGCCCAAAGTGAGGACGAGCGGCGAGTGCGAACTGCGTCCGGTGGTGGAAGGCGACGTGTGACGACAGCGGCGCGGCGCGGCGATCGGTCGGCGGCACAGGCGGCAGCAGCGGCTTGCGCATTGAAGGAAACGCGCATGGTTAGAAGCCCATTTGGCGGATTTAGGAAAAGCGCATGGCCAAAGCTGAAAAAACGTGACGACATGAGCATTAGGGCGTTAAAACGACGAAGTGTGCGCTCGGTAGAATCAACTTCATTTGAAAAAGAATTCGATGAACTTCGAGAACTCTGCGACCAGGAAGCAGTCGTGTCTTGGGACGACTTCGAGAATTCGGCGGGCCAGCAAAAATTCATCTTCAACGAGCTGCTCATCACCAAAGAGCTTGCAAAGCTATCCGAGAACACCGGCATTGGCGTCACGCCAACATTCACACAATTGCTCATGAGAAAAATCGCTGTTTTCCGCCCGAATTGGCTGACCGCCTGGGATGCCTTCAAGAAGAGAAAGCCTGAATTGGCGGAGAATGAACGACCGGACACTTATGCCGATGAAGGACTTCATTTCATAGTCATCGGTCTTTCCTATGGCGGAAAAGACCTGGAGGCGTATACGATCAAAAATGGCCGAGAATGTTACTCCATCTTCCACCAAATCGCCTTGTCCATCGCGATCGCCGAAGACGTGCTCAAACTAGAGCACCGGGATCTCCACGCCGGGAACATTCTCGTGGAGGAGTGCTCGATTTTGTTGAAATTTTGGCACTGCAGGAAAATATTGAAACAGAAGGACGAACGAAGCACTAATAGCTGTGTAACAACACCAGCAGAAGCAGCAAAACCAAAACAAACGGCAAAAGGACGTTGGCAAAGTCATTTCGGACGAGTGTGCGCAGCCCGAACAACGCTATTTGGCACTTTGGCTGGAATCCTTCGAGAGTTTAGAACTCATCCATTACTTTACGGCACTTTTCTTAAGGTAACTCAGTCTCACTCACTGATCATGTCCAAAGAGCGAGAGCGTCTTCGGAAAGAAGCAAACCATGCTGCGTGTTTTTTATCGGAGTATGAGAGCGGAATTGTTATGCTCCCCTCTCCAAGCCAACCGTCCACACATCTGCGGCGCCTAGAGCTACAGCAGCCACATGGACATTTTCCTTGCCCGGAACCGGAATGTGAACAAGTCTTGGACTCCAAAAAAGGACTGTCAAACCACAAGAGATCACATAAAGCAGGCACCTCAAAGGAACCGCGGTCGCGCAGTGCCGGCAGTGCCGCTGCTGCCCCATTGACGCCTCGTCAGCCAATTTTGGTCAATCTCGATGTGTCGGGTCCGGAAGAGTTTTTTGCTGAAGATCATCAGGTGCAACCGGTCGCTGCTGACGGAATTCGTCGCCAACAATCGCCGGCCGAACATGCCATTGCTGGCTTCACTTCAGCATTGGGTGGAGGCGGCGGCAATGCCAATGGGCCAGCAGCACATGCTGGATTACCTAGATTTCCTGTCATGCCAAAGGGGCAACGGACGCGCAGCGCCACTGAGCCAAGGAGGTCTCGTCGGATCGCGGCCAATGCCAACGCAGGCGCCGCCAGAATTTTCACCACCTCTACCCCCACCGCTGAGCTATGTGGCAAACAACGGCGGAGCAATAAAAATTCGGCACTTCGGCGCGCCAATGAGGAGCATGAACTGCGCGCCAATGATGAGCAGGAAACCGAATCATCAGACGTTGATGAAGACGAATATGTGGTCGAAAGCGATGACGACATCCCGGCGGTTGAGCCCAAAGAGCGTGAAGAGCGATGGGTGGACCCATTACCAGAAAAGTTGCAATTTCAGCAGCAGGTGAACAAAATTGCCGAGCTGAAATGCAAATACTCGCGGGCCAATGCCAAAGTGCACTGGTACAAGGACCGAAAGAAGCTGTTCTCGGACGGTCTCAAGTACAAAATTTTGATCGACAAACAGTCCGTCACGCTGATCATCAACAACCCGGACCCGGACGACAGCGGCAAGTACACATGCGAAGCGAACGGAGTGCCCACCAATTCATTTGTCACTGTGGAGGACTCACCAGACCAACAACCATTGTCCTCCACCGCTCGTCGCCGCGACTCGCGCAGACCGAAAAGTGCCAGAAAGAAAGCCACTGCATTGACCCCCTTGGACGCCATGCAGTGTTGCAGCAGCCATTTGACGCCGCCACGTCCCAAAAACACGGACCTGGACACATCCGGCACACCGGCACCATACCAACCATTGTCCTCCACCGCCCGTCACCGCGAGCCGCGCAGACCGATTGACATGGCGGCGATTGAGGTGCGCTGCGCGGACGAACCGCTGCTGGCCAAGGCGCCATTCAATGTGCCAGGGCGGCCCTACCCACCGGAGCCACTGTACACCACCGACAACTCAATCATGCTCAAATGGGAACGACCGTCGCTGGACAGAGGCACGCCGATTACTGACTACGAGCTGGAAATACGCGAGCGTGGCACCAAGCTCTGGGAGAAGGCTACCACCACCAACGCTGCGCTATGGGAGAAGGAAGCATTTGGCAATGTGCCGGACACACGAATCAAGGTGACCAGCGTCAAACGGCAGCAAATCTACGAGTTCCGCGTGGCTGCAGTGAACGCGGCGGGCCGAGGCGAGTGGAGCAAGAACTCTGTGCCAATTGCTGCCACATGGTCCCCCTGTAAGCCGTTGATCACCATGGGACCGTTGGCATGCGACATGACTGTGCTGGTGGGTGAACAGGCCAAGCTGCTGGTGCCCTACGCAGCGAATTCTTCACGGCCGAAATTCGTTTGGAGCAAGAATGGCAAACCGATGGATCCGCGTGACGACCCACGCGTTAAGAAGGAAAAAAGCGACATTCTCATCCAGCTGTGCTACCAGAAATGCGAACAATCGGACACCGGCACCTATTCCATTCGCATTGTGAACGACTTGGGCTCGGATTCGGTGGACTTGCGCCTGAAGGTGGTCGATCGCCCTGCACCGCCCGAGGGGTCATTGAAGGAGCGGACCGCGTCTAGTAGCGGAAGGCGACGCGTTGGCAGTACAGCGGCGGATCGGTCGGCACAGGCGGCAGCAGCGGCTTGCGCTGCGGATGAAGAGGCAACGGACGAGGTGGACAACAACGAGGAGGAGCGACAGAACATGGCGGCGGTGACAAAAAGGATGGCAAATTTGGGGGCCGGTCGAGAAACGGAGGTCAAACAAATAAATTATTTATTAAAGAGAAAGCCTGAATTGGCGGAGAATGAACGACCGGACACTTATGCCGATGAAGGACTTCATTTCATAGTCATCGGTCTTTCCTATGGCGGAAAAGACCTGGAGGCGTATACGATCAAAAATGGCCGAGAATGTTACTCCATCTTCCACCAAATCGCCTTGTCCATCGCGATCGCCGAAGACGTGCTCAAACTAGAGCACCGGGATCTCCACGCCGGGAACATTCTCGTGGAGGAGTGCTCGGTCGATGAAAAAATTCGGTATAAGTACCTTGGAAAACAAATCGCTGTCCGTTCAAATGGGGTGCGTGCCTCCATTATCGACTATTCAATATCGCGCATAGAAAAAAAAGGCGTTGTGTTCTTCGCTGATCTCAGCGAAGAAACGGGACTTTTCGAGCAAAATGGTGTCAGCAAAGGTGGCGACTACCAATACGACGTCTACAGGATGATGAAGGCGGCGGTCAACGAAAATTGGGCCAAATTCTGGCCCCAAACAAATGTCCTCTGGATGGGGTACGCGGCAAAGAAGCTGTTTAACTGGAAATTTATGCTCGATGAGGTTGGACCACTGCTCTCCTCACTGTACATCGAACAAATTCCTTCTCTGGCACACCGATTTTCTCGTCACTGGCCAAAAACTACTAAAATTAATCATCGACCTAGACGAGACAGACCCAAAATGGGTCGGCGCTTGGTACCTCGGTTTTCTGTTCGCCTCCATTATTGGCTTCATGGCTGTTTTTCCAACACTCATTTTTCCAAAAATTACATTGAATTTGCATGGAACACGTCTTCAAGAAGAGCGTTGGGGCAGAAAAAACGTTCACCCGAATGTTGCGGTATTCCGCCGTCGTACGGCAATCGAACAGCAATCGTTTTTGGCGAAGGGAGCGCCAATTTTGATGAGGCTGGCAATGAGAAGGCGCCAATGGTCCAATTTCAGTCCTCAGCACTAAAGCCTCGTTCGGGTCCCATTTGGTATCAACTCGTCACATTCCGATTGCAATCTACAAAATTCTACTCAATGGCCCTTATATGCTTGCTCATCACTTTGGGCATGTCTATTGACGTACTGATCGTTACGGGCTGTTCCACATTCATGTCCAAATATTTGGAACGACAGTTTGGCGTGGCGCCCAGCAAATCGACACTTTTCATCGGATCCGTCTCTTTCATATGCCCAAATTCCGCGGCTTCCTCAAGAGTGCGCTGCGCTGCCCGAACGGACCAACGAAATTGTGTGGCTGCAGCACATGAAATTCATCGTCTTCGACGACACTGTTCTCATAAGGTCCGTCTCTTTCGTATGCCCAAATTCTGCGGCCTCCTCAAAAGTGCGCTGCGCTGACCGAACCAACGAATTGTGTGACTGCACCACATGAAATTCTTCGTCTTCGATGAACACTGTCGTCATCACAAGGTTTTTTTCTCGCATTTTTGCCCTATTAATGGGTCCGTATGCCATAAATATTGTCTTTGGCCAAAATACTCTTTTAAATTAATTTAAAAGTAATTATTGATTTTGAATTTTTGACATCGGGAATCGTACCTCTGATTTCCTACTATTTTGTTTTTAATTTAAAAAAAACTAATTT
>Hetgly06120.t1 gene=Hg119
AGTGAATCTTTTGTCAACCATCAAGAATCGCTATTTGCTGATCGAAGACGGTCCACTGTTGACCGACTTTTTCGTCGACCTGTTCCGCACTGTTGGCGACAATCCTTCCCGGAGACAGTGCCGCATTGGGCCGACCGCACCACCACTTTTGTGGAGCCCTTCCTGCAGATGGGCCTGTCCAACATGAACCAGGAAGTTGAGCTGCTCAGCAAATTGTTCAGCAGTTGCATCACAGCCTGCGGTCAAAAAGGAGACGACGACAATCCACCGGCTGGAGTTCACGCTGATCACAGCCTATTTCAAACTGTTCGACCCTACGCCGACTTCATCTGCACAAGTGGCCGCGCCCCGTTCAAAATTGTTTTGCGTCGCCACAGGCTCGGCTGTCACTGTGCTGTTTTTCATCTTTTTGTACAGTTCAGCATCATTGTGTACCGAGTGATTGTGTTCGAGTTTTTTATACCAGCACATGTTTGCAAAACCATCATCGGACATTGGAAATTTGGTCGGTGCCATAATTTGCGAAAAAATAAGAATTATACAAAATTTTGAATATTTAAATCTTGGAATTAATGGTTGTCGGATTTTCTTTTTAATTACTTAATTAAATACACATCAAAAACCACTTAAAACATGTATTTTTATAATTTTCAAAAAAAAAAACAAAATTTTTTTTTAAATAAAAAAAAAATTTTTTTTTATTCAAGACCCACGCCGTTGCCTTTTGTCGTATTCTTTCTGCTGCCCACCCGCGCAAGTTGGTTTTGGTCGCGTCCGGTTGAGAACAGCGTGCACTTCTCGGTAAATGAGCAAATAAAAACGAAAATTTCATTCAAAAACTTGTTTTTGACTTATCATGAAAAATGGGTCCAAAAAAATCAATTATTTAAATCTTGGACAGAATTTTGAGAATAATTAATGTCCTGTTTTGCCAAGTAGCGCCGGTGTATAAAATTAGTTTTTTTTCAAAATTTAATTTTATTATTTTTTTTTTGTTCCAATAGCTTTGCATCGGCCCACCCTTCCCGAACGTGACCCTTGACAAAAAACGGAGTATTTTTCGGATGCCAAACGGATCATCGATTACGTGTTGGTCTACGAGGAGAAGGAAATGACGAACAGCAACTACAACAACAATTGCGATGACAACAAACAACGCGATAATTCACGTTCATCCCCCAACGGCACGCACAAAAAGTGAGAAATAAATAAAATGAGAATTTTTTCAATTGTCTAACTTAAGTTTTTCTATTAAAAAATATTAAATTTGTTTCAACACTAAAAAAAAAATTTTCCAATTTTTTATTTTCAAAAAATCCAAGAAAATTTCAAGGGAACATTGAAAAATTTTTCAGCAATTGTTTCTCTGCTCCGTCTGAGTGCCCATTTCTTAGCCGGTCTTCATGCGTTGGAACGGCTCTGACAACTTTCCATGGATGCCAATGCCATCGGCGGAGGGGCGAAAGACAACGCAAAGGGCGGAGAGACGGCAGACGCCGAGGCAAATTTGTTTTAAAACTTAAATTTAATTTTTTGTTTCTGCAGCTGCCTCTGCGCAGTGCTTCCCTCGAAAAATTGGATCTTTCATCCAATGCCTTGCGCAGAGTGCCGACCAAATTGGTGGCCCATTAATTGCATTCCCTCAAAATTTTGAGTTTGGCGGCGATTTCAATCGAACGGATGGAACCGAAATTAATGGCCAATTTCAGCGCATTAAAACAGGCAAAATTAGGAAATTGAACTTGAATAGACAAACCAATTATGTAATTTAGCCATTTTCAGTTGGACTTTTCCCAAAATTTCCTCCATTTTTTGCCCTTTGGAATTTTCGATGGACTCTACGAATTGCAAGCTCTGCTCGGATTGGCCTCACTTCAATTGGTTAATGTCAGCAAAAATGCAATGG
>Hetgly06121.t1 gene=Hg122
ATGTCTTCTGGTTCTAGTGGTCCCGAAGAAGGTGAAATTGGGGCCGAACTCTTTGCAAATGAAGCCTTTGAAGAAGCAGAGGAACCAGCTGGTCTTGTCCAATTTTTTCGAGCAGAAAGCAAGCGTGGCCGAGAGTTAATCAGAAGCGGCGGTTTTGAATATGCCTTTGAAGCGGACAGCGGACTTCAAGAAGGCATGAAAAGAAAAGAAATTTATGTTGAACAAGACGAAAATTTGCTCGCGCTTTACAACACACGTGAACAGCGCCATCCCTACCAATATTTAAGAGCTGTGGCCTATCGAATGCCGGACCCAATTTAA
>Hetgly06122.t1 gene=Hg123
ATGGCAGCGCCAATAGTGGCCGAAAGCTACAGCAGCGCCAAGCAACAGCGGACAGAATTCAATTATCAACAAAAATTGCAATCAACCCAACCCACCAACAATGAATATTCTACGCCATCATTGACGTTCATTGAACAAATCGGGCGAATGGAACTGGTTCAGTCCATTGTTCAATTCATGGAAAAAATTGGCTTAGGAACGGGCGAAAATAATAAAAAAAAAAAACAGCGAATTGAGCGCCGAAGTGCTACAAATAAAAATTTGAAAGAACAACACAGGGAAATTTTTGGCAGAATGCACATGGAAAAACAGGCATCAACATCGTCCGCTGCTTCTTCGTACATTTTTGGCGGAATGGCAGGGCAGGCGGCACCCGGTGGCGACAAAAGAGGCAGACAAATGGCCCGGACGAGTGAATCCAAAAAAAGGTTCAATTCCGCGACAAGGATGGCCAACAGGGCCGGACTCACTCGCGCGCAGTTGCGAAGCAAGCTTGTGGCCGAGCCCGAGTACATTCCCAATTCAAGCCGAATGCCGCCCGATCAATTGCTAAGCCTGGAGGACTTGCCAAAAGCGACGCAAACTGTTCATTGCCAGAAATGTGCAAAACAATTCAAATCAAAAAGAAGTTTGAGCCTACATGAGCGAGTCCATAAAAAAGGCACGCCACAGGAATCTCGGACGCGCAGTGCCGGCACTGGCGCTGCCCCGTTGACGCCGCCTCGTCAGCGCATGGTCAATCTCGACGAGTCATCGGGCCCGGACGATGTGTTTGCTGAAGCTCATCCGATGCAACCGGTCGCTGCTGACGGTACCCCAACATTACCCGGAGGCATTCCCCGCAATTCCCAAGCCCAAATTGACGTTGTCCGGAAATCGACGTCGGCATGTGGCAAAAAAAATTCGGTGAACGCGGAGGGCGAGGCGGACAAAGCGATTGTGGCCAAAAACAAGGCCGGTCCAGGACAATCAAGTGACCCGTCAGACATGATCATGCTGCCTTCAACATCGGATGCACCAAGGAGGTCTCGTCGGATCGCGGCCAGTGCTAACGCAGGTGCCGCCTCTGCCGCGAGCACTTCCACTGCCACCGCACTCACCACCAGATTCCGCGTGTTGGCCATCAACGAAACGGGTCCGTCCGCACCACCGGCCCCGTCAGCATCGCAAATCTGCACGGCGCGCTTCCTGAAGCCGCAGATCATCACCGCGCAGCGCAAGTGGAAAGTGCGCGCAGGCAACACACTGACGCTGGGCATCAAATTTGTTGGCACGCCTGACCCGTCCGTGTGCTGGGTGAAGGCAGGCGGGACCGGCACTCTGCCACCCGAGCTGATCATGGAAGAACACCGCCCAGGCAACACGTCAATCTTCTTCCCAGCCGCAAAGCGCTCTGAATGCGGCACCTATGAGCTACGGCTGAAGAACAAAGTTGGCGAGACGGAAGGCCACTTTGAAGTGCTGGTGCAAGACCGTCCTGCACCGCCGAAGGGACCGCTTGCGGTGGACAATGTGACGCGCGACTCGTGCACACTGTCATGGCAACCGCCGGAGGACGACGGTGGCTCCGAAGTCATCAGCTACGTGGTCGGACGCCGTGATGTGGGCAGCCAAGTTTGGGTGCCGGTCGACAACATTGTCGTCGGCATAAGCAGCACCGTGCCGAACCTGCAGGAGGGCCACGATTATCAATTCCGAGTGTGTGCCGTGAATGCGTTTGGCTGTTCCGACCCGTTGAACACCGACTCGGCCGTGTTGGCCAAGGACCCATACGGCTCGTTTGACGAATCGGATGCCGAGGATCCAGCTGAAGAGGTGCCGCCAGGCACTGTTGAAATTGGCCTTCGCTCACTTGAGCGGACCGCGTCCGGTAGCGGAAGGCGACGCGTTGGCAGCACCGCGGCGGACCGGTCGGCAAAGGCGGCAGCAGCGGCTTGCGCTGCGGGCGAAGAGGCAAAGGACGAGGTGGACAACAACGAGGAGGAGCGACAGAACATGGCGGTGGACCTGGAAACATCCGGCACACCGGCACGGATTGTCGAAATCCCAGAAAATGTGACGGTGGTTGAGGGCGAATTGGCCATCATCAAATGCGTCGTGGAGGGCAACCCGGCACCGACAATTGTGTGGAAAAAGGGCGGCCGAAAAATGCCATTGACCGACGACCGAGTGCGGTGCCAAACGGACGGTGACACGGGACATGTTTCTCTGATCATTTCCAAATGTCGGCCACAAGATGGGGACGAGTACACATTGATGGTGAAGAACGCGCATGGCAAGCACAAAGTTGGCGCCAAGCTGCTTGTCACGCCAGCGGCCGAATCAAATTTGGACTTCCGGGCCAAGCAGAAAAAACGTGACACGGGCATTAGCAATTCGGAACAGGAAAAACAGCGCCAACGGAGTGATGCCGAGCCCAAAAGCAAGGCTGAACGACGCAAACGCCAAGTGTATGTGGTGGAGGAGCCCCGTGACACATTTGTTGTGCCGTTGAACTCGCAGCATGCCAACGAAAAGGAAAATGCCACTTTTGAATGCGAAGTGAACGACAAGGAGATCGATGTGAAATGGTTCCATGACGGTGCCGAGATCGGGATGGACGGGCGGCACTTTAAGGAACGGGCTGGATGCCGTCGTCGCCTGCTGATCATCAATGTACTCATTGAAGACCACGGGGAGTACAAATGCACAGCCAAAGACGACGAAACAATGGCCCAACTCATTGTGCACCCCAAATTCGTCAAAAAAAGCGGAGCGCAAGCCGGTGACCTGCTGGTTGGACGATGA
>Hetgly06123.t1 gene=Hetgly06123
ATGTCCGACTACCAAATGTATGTCCGCCTCAACCAGCAAATCTTGTTCCCGTTGAATTGGCCGGTAACTACCGTACCTGTAATCCATACGCCAGGTCCGGTACCCCACAGGCCTGCCCAGAGAATTCTGCATGTCTGTACACAGGCCAAGACAATGGCTTTAAATGTTGCCGAGTGCAGCTGCAAAGTTCGCCCTTTTCCTCACGTCGTGTGCATCGATTTTTACATTAGAAAATTTTGA
>Hetgly06124.t1 gene=Hg124
ATGCCGAAAAATGGGCCGTCTCCATTACTTAGCCTTGACGAGGCCGGCGACTATTCACTGTATTTTGACGGTACCAAGCGTGTTGCATTAGTTCACATGGCCTACGGTTATTTGCCTGAACATTATCCTGAGAAGGACTTTGACCTGCGCGTGATGATGGAGCGTTCAACAGCTATCCTGTCGCCAAACCTTCGTCTTCAACTTGCCGGAACGAAGAAAATCCAACAGATTTTGAGCAAACCCGGCACATTGGAACATTTCTTCCCCAACGACCCTCAACAGGTGGCCAAAATTCGAAACACATTCACCGAACTGTGGGGCCTAGAGGAGAATGATGAAATTACCAAGGCGGTGATTGTGGACGCCATGAAAAATTGCCATGACTATGTGATGAAATCGCAGATGGACGGCGGGCATGGCATTTATTTCGATGAAGAAATTCCGAAAATGTTGGCCACGTTGAGCCTGGAAGAGCGAGGCGCGTTCATTCTGATGAAGAAGATCAATCCGGTGGTGGCCAAACACGAAGGTCCAACAAAACTTTAA
>Hetgly06125.t1 gene=Hg125
TTTCAGATTAATTTGCTGCTCATTTCCTACAATTTGTGCATCAAAAATGGCTTCAATCAACAATGGTCATGCCGCGGTTGGCGCTGCCAATGGCATTCAGCAAAAAAAGTTGCTGCAACAGGCACAGGGGACGAACATGGCACAACTCCCGCTCAAGGCCAATGACTACGCGTTGGCCGCAGTGCGCAATGATGCCGAGCTGAAATTGTTGGCCGAGTACGCGGTTGACTACGCGCATTCAATTGGCCTCGTTGGACGCAGTGGGGATGACAAGTACAAACACTCCAACGATGTGTCAGTGGCGCCTCCAATCGCCCTGTTGCCGTCGCCGTTCCCCCGCGAGTTGTACGAGCAGGCCACTGACGCGCAACAGTCGCTGAACGAACTGTACTTCCGCATCGCATGCGACCACGACTTCCTGATGGAGGCGTACAAGGACGTGATCAAGGGCGACCCGTTCCATGCCAAACTGATTGAGTTGGCCAAAGTCATCCAAAAGGAGGGCATCCGACAGCCGCTGATGGTTGGACTGCAACGAGCTGATTATTTATCCCACTGGAATGAAGCAGCGCAAAAAATGGAGCTTAAACAAGTCGAAGTGAACCCGGGCCAAATTGGCGGCCCCGGGGCGGCTACTGCCGTTTCAAAGTGCCACCGTAAAATGCTGGACAAGGTGGAGATTATGCACGGCAAAAAATTGCCAATTATGGCGAAGGCAGTTGTGCCAGAAAATCGCCCGGGGCCAGGAATTGCGCGGACCCTTTACCAAGCCTGGAAAATGTTCGGCGACCCAAACGCAATCATTTTGTATGTCAATCAACCCGACCTGTTCCCGGTGTGCCACTTTGAGCAGCTCCAATTTGTGATGTTCCAAGTGGAAAAGCTGGCTAAGCAGGACGGTAACCATGTGCTGGTCCGTCGGGCGTCATTTATTGAACTGCGCAAAAGACTTAGCCTTGACGAGGCCGGCGACTATTCACTGTATTTTGACGGTACCAAGCGTGTTGCATTAGTTCACATGGCCTACGGTTATTTGCCTGAACATTATCCTGAGAAGGACTTTGACCTGCGCGTGATGATGGAGCGTTCAACAGCTATCCTGTCGCCAAACCTTCGTCTTCAACTTGCCGGAACGAAGAAAATCCAACAGATTTTGAGCAAACCCGGCACATTGGAACATTTCTTCCCCAACGACCCTCAACAGGTGGCCAAAATTCGAAACACATTCACCGAACTGTGGGGCCTAGAGGAGAATGATGAAATTACCAAGGCGGTGATTGTGGACGCCATGAAAAATTGCCATGACTATGTGATGAAATCGCAGATGGACGGCGGGCATGGCATTTATTTCGATGAAGAAATTCCGAAAATGTTGGCCACGTTGAGCCTGGAAGAGCGAGGCGCGTTCATTCTGATGAAGAAGATCAATCCGGTGGTGGCCAAAAACTTCATGGTTCGCCCGTTCGAAAAGCCCCACCAAGAGGAAGTGAACAGTGAGATGGGCATCTATGGCTCACTGATCGGTGATCAGAGTACGGGAAAAGTGCTGGTCAACTCGGTGAATGGGCATTTGGTGCGAAGCAAGGCCGCTTCGCAGAACCACGGTGGCGTGTGCAGTGGCAGTGGCGTGATCGACTCCGTATTACTGTTCCCGTCAAGCGAATTCCGTTGAATATCACACCAAAAACACACACAATCAATTAATCAATCATTTATGATCAAGAATAGCTGCTAATTGAGCCAATTAAATTTAATTGCTTAAATTAATTTTTAAAAAATGGCATTTTTAATTTCATAAAAAAAATTATGAATCCGTGTACAATTGGCAGCATTTTTCACATGTTCTTCAAAATGTTAACAATTCGTCAAAATATAGCCAATTTTTTCACCGCAAATCATTTTTTTAAATTTAATTTTCCATTTAAACAAAAATTATTACATGAATTGACCGCATCAAATGAATTGTCTGCCATACATTTTTAATTATTAAAATATTTTATCAGAATAAACATTTATTGCTAA
>Hetgly06126.t1 gene=Hetgly06126
ATGGCCAAAAAGCACACAATTGTGCTTACAGTAGTCGGAGTTTGTATCGTAGTGGCAGTGGTTGCCTGGGGCATTATTCGTAGCCAATTGGGCGGTTCAAACACGAGTGGCATTGTTACTGTGCCGGTTCAACTGTATTCCTCATCCATCCTGCACATATGGCTGAAAACGCGTTCGGCCACTCAGGTATGCGCATTGGATGACCGCAATAATGGCAATAATTTGAAAACCCAGAATTAG
>Hetgly06127.t1 gene=Hetgly06127
ATGGCGAATTTGAGAACGCCACCGCTAACGCGGCAACGCGCCCTTAACTTTGGAATTGCACTGGACAATGCCGGAAACCAAATTTCAGCACAATTTAACCCGAATTTAGGACAAAACCGTTCTTTTAGCCCTGAATTGGGTCATGTAGAAATGGTTGGTAATGATGGCGTTTCAGAATACGGCGAAGACTTTGACGACGAACAGAATTTGAGAAGCAGACTTTTGGCAATGACAATGAACATCAGCAATCCAGCGGTGAATGTACCGGACGAGAATGCACAAAACCAGCGAATGGCCATGAATGCACCGCTTGTGAATTCGGGTATTTTACGTGTCAACAACAGAAATGTGGGAGTAAATGGCTTGGGAGAAACAAGAGAAAGATTTTTGTCAAACAATTTCGAATTGGGTGTAAGCAATTTGAACAATGCGGGATTAGTTCCTACATATCCCCCTGACCATGAATCAACGCCAGTGAGTGCCTTGCGTGGCGAAATTCGAGCTTTTGGTAATTTGGTTGAAAATCGCCGACATGAAAATGAACTTTTGGCGGCGCGAAATGACGCACAATACACTCAGCCGCGAGTGGACGGAGTTCATCCAGTTTTTGTACGTCAAATGGCTGTCCACTCCCAACTGACAGCTTTGCGCCTTTCGGCTAACCACCAAGCTCATGTTGCAACGAGTTCAATCGAACCCCTTGCTCGAAACGCGCAAGTAGACAACATTGGTTGCAATAACAATCCGCAGCGACAAATGGAAAATTTGCAACAAAATTTACACCGGCAAATGGTTCGTAATGGTGAAAATTTTGAACCCGGAAATCACAACTACGGTTGTGAGGGGCGAAACCCAAACGCAGAACCGAATATAAACCCGCGCCCAAATAGCCAACATTTTCATCATTTTCGTCAAGAAAATTTTCCGCAACCCTACAACCAGCAACAAAACCGGCCTAATTGTTATAATTGTGGAAAATTCGGACATTTTGCCAGGCAATGTACTGAACCACAACGAAACCAAGGCACGCCGAATAACAACAGCTCGGCATCAAATTTCGTTGGTCAGAATTTTCTTGTTGAACAACAGGAAAAACCACCAAAACCGAGTCAAAATCTTTTTGTTCGTGGCATTTCGTTAAGTTCTGCTGAGATGGAAAAATTGTTTGGAAAGGATGGAACCGAAAATGAGACGACGAAAAATTTGAATAAGGCGACCATACCATCTCACAACGAAAATTTCGTTTATTCGGCCGGACAAATGAAATTTGAGAATAACGCTACGGCAGTTTTTCCAAATTCGGGCACCGCAAGTGAAGCGAAAAATGAGCGTGCGTCGGAATTTTCCCAAAAAGGAAAATTTTCTGAAACCAAAAGGAGCCATTGGACAGATTCTGATCAAAAGTCGATGACTAAGGAAAAGTGGAAGAAAGTTGAAAGGGCACCAAGGAACATCGCGCCCAAAGTGGACTTCCGAATTAAAAGAAATTGTGATGAGAAAAATCACAACTTTGGCCCAAAAGAACAAGTGGGAAAGAATTTTGAAGTAAAAAAAGGCAGTGGTGAAAATTCGGGAAAAAGTGGAAGGATTTTTTCGTGCAAAAATTCTGAAGTTCAATTAGGGACAATTGAAATTTTGGAAGGTCGGAAGGAGTTTGAGAGAAAAAGATTGAAGTTGGGCAGAAACTCTCAACGAGAAAAGATTGGACGAAATGTCTCACTTGATGGAAATGGCCCACGAACGAATTATGGCACAAATTTGAATTCGTTTCGACAAAACTGTGTTTTCTGGCCAAGGAGAGCGAATGCAGACCAGATGAGCCGTGAAACTTTGCCATTTGATCGGGGTTGGGTCGAGTTGACCGCCTCGTGTCCGGATTCAACTTCGACTTCTGCTGATCGACAACCAATGATGCGCGGACTTCGGTGCAATGGCAGTGAGCTGATCCCAAACGGACCTCACCTTTCGACAGCCGGATGCGGGATGTGCAGCTGA
>Hetgly06128.t1 gene=Hg128
TTTTAGAGGATTTTTTTTTTCTAAATTATTCCAAATGGCCAAAAAGCACACAATTGTGCTTACAGTAGTCGGAGTTTGTATCGTAGTGGCAGTGGTTGCCTGGGGCATTATTCGTAGCCAATTGGGCGGTTCAAACACGAGTGGCATTGTTACTGTGCCGGTTCAACTGTATTCCTCATCCATCCTGCACATATGGCTGAAAACGCGTTCGGCCACTCAGGAAGTGCCAGCCCGGATCCGACTCCGGCACCCGGCAATGGACAATGTGACGCTGGCCAAAACGGACCAGTTCATCGAGTACGAGTTCCACGAGTTAGCACTTCTGCTTGAAGGACCCGCAAATCTGGAATGGGCCAAAGAAGACACCCGTGTCTCCTATATTTACGTGTTCGAGCCGGACACCGTTTTGGAGCGCGGCATTCGTCCGGCATTCATTTCAAATGCGGCACGCTTTCCGGACGTGCGCGAGGGGTACCATTTTCGTCCGCCGTTGGGATGGATGAACGACCCGAATGGGTTCAGCAAATTTGGTGATCACTTTCATCTGTTCTACCAACATTACCCACATGCGTTGCATTGGAGTGCAATGTTTTGGGGTCACGCGGTCAGCCGAGATTTGATCAATTGGGTGCATCAGCCAATCTTTTTGCTGCCCGACCCCGCAGTGGCACTTGAGCATGATGGCATCGGCGGCATTTATTCCGGCTCTGCGGTGGTGGTGATTGATGCCGTTTCGGGACGGCCCAAAATGAATGTGTACTACACGGACTCATTGAATGATCGTGTGCCATGGCAATTCCAAAGAGCAGTGACCACAACGAATGGCATCATGCCAGATCGTGCGGCCACCACGCTGATCCCGGATGTGCCGCCCGGTGTTGGCCTAATGCCGGATTTTCGGGACCCTAGCGTTTTTATGGGGCCTGATGGACGTTGGAAAATGGTGTTGAGCAGCAAGGATAACCAGGGCGGAGTTGTGCTCCTCTACGAGACGACGGACAAACAAGCAATGGCTAATTGGCGCTTCCTGAACGTGTTGCACCGCGACTCGCGCATCAACACAAGCGTTGTCGAATGCGCGGCACTATTACCATTGCCGGCACCTGTCGGTAGTCGAACATCCTCCACTGTTCCGCTTTGGGTGCTACTGTACGGACAGTTGGACGCGTTTGACCCGCGCACCGGACGGCGGAACATGTCGCCTGCGTTTGTCGGCACCTTTGACGGGCGGAAATTCCGCGCACTGTTCGAGCAGGAATTGGACTTCGCCACTGGCTCCTATGCATTCCAAGGTTTCTATGAGCAATCGTTGGACCAAACACTAATGATCGGATGGTTGGCCAACTGGCGCGATTACGACGCCGAAACAAAGTCCGATTTTCCAACATCAATGACCGTACCACGACAAATGTTGCTCAGCAGAGATGGAACGGCACTGCTCACTCCTCCAATTGATCTGCGTTCATTGCGCATGCGTCGGCTTGACGATGGTCATCTCCTGCAGAGTGGCCAAACTGTACAGTTGCCGACTGGGACAGCCGAAATTCGGTTGATTATTCGCCAGGAAGTGCTCCAACTTCATGACGCCACTGTTCAACTGGAAGTGGACCATCCCAAGACTGAAACAGCGCCGGGCGTTCTCATTGCGCCAGAGGGTCTTGAAATTTTGCCGGGCAAATCGCACAGTACGCCACAACGACTGATTGCGCTGGGCGCAAGGCCAAGCGAAGTGCACATTCTGTTGGACACTGGCTCAATTGAAGTGTTCGCGGACGGCGGAAGATGGGCTGGGACCCATCGGTTCGAAGGCTTTGACCGCTTCACCGCCATCCGTCTTCGAGGTGAACTGAGCGCGGTGGTGCGCTCGGAGGTGTGGGCACTGAAAGGTGCCGAATTTCGTGGCCGTCTTGGCCCCCAACAATTTTGATATGGATTTTTTTATACATTTTGTGCCAATACACATTTTTGCTGTTTTTGTAATTAATTAGTCTCACAATGATCATCAATAATCACATCATCAAGGCTGGCAAATGGAAAAAGATTTGAATAAAAATTGCAAAAAA
>Hetgly06129.t1 gene=Hetgly06129
ATGTTGCCGGGTCGTACTCTAGCATCCTCCGGATCAAGCAGAACAACTGCTGGTGCTCTTCACTGGTGGAGACCTTATTTCCTGTCGGAAGGGAAAGGGTTGATTAACAACGGAAGAAATAAATCCGCTCACGGAGAGTGGCTCGCAGTGGTGCAGAACGTGATGGAGGCTGTTCCAAAAAGTGACGAATCGCTGCCAGGAAGTCTGATAAAGAAAGGTGAAGGACTAAGCCTCGGCTACATGACATTTCGCCAACTGACATTTCGCCAACTCAGCCAAAAACAGACATTTTGCCAACTGACATCTCACCAATTTTACATCTCGCCAACTGACATCTCGCCAACATGA
>Hetgly06130.t1 gene=Hetgly06130
TGGCAGGTCACCGTTTGTGTGCCATATACGATACAGAATGTTTGGTGATGTTTGAAGCGGCATTTCCCAACATTTTTTAAATCTTTCCCGATAGACTCATTCAATTTTAAAATAAATTTAATAAAAATTAAAATAATAAAAATTATAAAAAGAATTCAATGGAAAAGACTGACAATGCTATGGAGGCGTAAACTCCAATTTTCAGTAGTGCGATTTCTAATCTCTTCACTTTTTAAAATTTAAGCGAGGCTTAGGGTGTACCGACATTTCGCCAACTTGACATCTCGCCAACTGACATCTCGCCAACTGACATTTCGCCAACTCAGCCAAAAACATTCATTTCGCCTACTAAGCCAAAATCTGACATTTTGCCAACTGACATTTCGCCAAATAGTTAAAAAAATTAAAGAAAAAAATTTCATATTTGTTCATTCCAACCATTTTTGGATCAATCAAAGCTTAAGAATTCCTTTCACTTTTTTATAATTTATTTTCTAGCGTAATTCAGATTCTAGCAAGAAATGCCAACTGAAGTCCTTCAACAGTTGAAGCGTGCCGTTGAACCCAACCTTCCCATAAAAGGCAAAAAAAAACAGCAGATTATCTTCATTAATAATTATTTTAAGTGATGAGCGACTTCGAGATTGGAATGCTGAAAGCAATGCGGCATGTCTTCACGTCATGCGAACGCTCGGGCTGCAGCTTCCACATGGCGCAAGCGGTGTTCCGAAAAGCCAGAAGCATGGGCATTTTTAATTTATTGGACGGAGATGATGACGAAGCACCGGTTCAAAGGAAGGCTGTTCACAAAACATTCAGATCAGTTCTCTCTTTGGCACTTATTCCGCCACTTTACGTTCGGCGAGCTTTTTCAACTATTGTCAGTGCGGCACCGCCTAGAGTTCAAGGATGGCTGGCGTATTTTGGCAAAACCTACATTGGCACCACTCAATTTGAGATTGACCATGGAGCGGAGGCATTTGAACTCAATGCTGATGACGGACGCTTCTTTCTATGTCGCACTCAAAGCACAACTCCGTTCAGTGTATCACAGACGTCCACAATAGCAGGCAGTGGACCAATACAATTCGGACTGCATTCGCCACAACCATCAACTCCGACAATCCCATTGTCCGAAGAAAGCAGCTTGCAGCTTATTCGACGCTGGGAACAAGACATCGTCTGTCCTCCACGTTTCCCGATCTCGTTTTGGAATGTCTACACCAGGGTCAAATGGCGGTACTAGTTGGGTTTGTATCCCCATTTTGGGTCAAATTTTTTCAAAATATATTTTTTTGTTTTAAAGGATCCTGAAAACAAATAACTGGGGGTTTTCGATGTCGCTGATCACGAATATGGCACCTATTTCGTCCAATTCGGGATCCCGGACCCGAATTCGAACAAAAAGTCGAAAATTCGAAT
>Hetgly06131.t1 gene=Hg129
ATGTCTTCATTTTGGAATGTGTCTGCTGTTCTCATGCTGATCACACTGATCTCTTTGCTTGACAACAGCAGTGAAGCGGTGCCATCGCCTTCAAAAAAGTCGTCGTCATTGTGGTCGAAACTTTTTTCAAACGATCGTGAAAGTGCTAAAAAATTGGGGAGCCCTTCTTCGACATCGGCTGCTGGTGGTGAATTTTCAGTGCAGTCCAAAATGTTTATACCGTATGCCAACAACGGCAACGGTGGCTTCTTTCTACCGTACCCGAGTGAAATGGACACAGTCAAACGCAGCAACACGTGTCTCGCTACTTTTTTCGATGAGAAGGCGATGAAATATTTGTACTCTTCACCGTCCGATTGA
>Hetgly06132.t1 gene=Hetgly06132
TTTTAGAGAATTCCATTGCTGAGAGTCTTTACTAAAATGTCTTCATTTTGGAATGTGTCTGCTGTTCTCATGCTGATCACACTGATCTCTTTGCTTGTCAACAGCAGTGAAGCGGTGCCGTTGCCTTCAAAAAAGTCGTCGTCATTGTGGTCGAAACTTTTTTCAAACGATCGTGAAAGTGCTAAAAAATTGGGAAGCCCTTCTTCGACATCGGCTGCTGGTGGTGAATTTTCAATGCAGTCCAAAATGTTTATACCGTATGCCAACAACGGCAACGGTGGCTTCTTTCTACCGTACCCGAGTGAAATGGACACAGTCAAACGCAGCAACACGGAAGGCCATTTCCTTGACCCATATGATGGTGGCTCATCGTGGTTGAGCCTCAGCGATCCGAGCCGACTTGAATGGAACTTCAACAGACTGCGCTAATGAGGAGGGCAAAGATCAACACAATGATCGTTGACCAAAAATCAGTGCGAAGAGACCAACGATCACACTCCCAACTGATCATTTATTAAAACCAATCAATAATTTATGACACAAATCACACCCAATCTTACAATTCAGATGGAGCATGTTCTTAAACATACACTTACATAATATTTTGTTGGAAAAATATGTGTTTTAC
>Hetgly06133.t1 gene=Hetgly06133
ATGCGGCCGTTGAATGCCAATTGGACGGCGTGTGCAGAGACAAAGACGGTGATGAGAACGGTGTGGTATACACCAGTGAATATGTGGAGTGCAAAATTGAAGGATGGAAATCGGACAAGTACAAGGGCAATGTGCCGGTGGACATTGGAGCGACAAAGAAGCGTGACGAAGGTTGTACAACTGACAGTAACCCATGCGAAGGCGAAGGGTACAAATGTGTCGCATACAATAAAGTCGACACCCGCGGATTTTGTTGGAAGGGTCCGCAAGGTGAAGGCGGCAATGAATTGTTTGCTTTGGCCATCGCCATCGCTGGCCTTGTCATCCTACTGTAATTTGGCCAAACCAGCAGCGACATACTGTAATGGAATGAGGAAATGA
>Hetgly06133.t2 gene=Hetgly06133
ATGCGGCCGTTGAATGCCAATTGGACGGCGTGTGCAGAGACAAAGACGGTGATGAGAACGGTGTGGGTACGGTATGCGAAAACTGTTAAAGTTGCACCTTCAAAAACTGCTGCAACAAAGTATACACCAGTGAATATGTGGAGTGCAAAATTGAAGGATGGAAATCGGACAAGTACAAGGGCAATGTGCCGGTGGACATTGGAGCGACAAAGAAGCGTGACGAAGGTTGTACAACTGACAGTAACCCATGCGAAGGCGAAGGGTACAAATGTGTCGCATACAATAAAGTCGACACCCGCGGATTTTGTTGGAAGGGTCCGCAAGGTGAAGGCGGCAATGAATTGTTTGCTTTGGCCATCGCCATCGCTGGCCTTGTCATCCTACTGTAATTTGGCCAAACCAGCAGCGACATACTGTAATGGAATGAGGAAATGA
>Hetgly06134.t1 gene=Hetgly06134
ATGTGGTGCAAAAATGAGGATCGCAAAATGGGAGGAAACATCGGAGGGAACTGGATGAGGACGGCGCAACAGACAACACGGCGGCAACAAACGCCAGGAAGGCACGAAAGGGTGGCACAGCGAGGATGGTCAAGGGCACGAAGGGACGGCACGTCAGGGCGCATGATCGGGCGGCTCAGGATGTGCGGTCAATGGCATGACGGAGCGGAACCGGCAGGGGGCGCGCGTGTCGAAAATGAACGAGTTATGCAGGGAATTCCCAACCCTGGGACCAAGAACGGTCCGGTGTTCACCAATCGCTGTCACCAACTGATCGCTGCACACACCAGTCGAGGACCAATTGACGCCGTTGGATCAGCGGTTTGCGTTACGCGGCTCAGGGAAGAAAATGGAAAGGCGGAGGAGACGAATGCACCTCAAGTGCAGTTGGTCAATTGA
>Hetgly06135.t1 gene=Hetgly06135
TTTTAGAGAATTCCATTGCTGAGAGTCTTTACTAAAATGTCTTCATTTTGGAATGTGTCTGCTGTTCTCATGCTGATCACACTGATCTCTTTGCTTGACAACAGCAGTGAAGCGGTGCCATCGCCTTCAAAAAAGTCGTCGTCATTGTGGTCGAAACTTTTTTCAAACGATCGTGAAAGTGCTAAAAAATTGGGGAGCCCTTCTTCGACATCGGCTGCTGGTGGTGAATTTTCAGTGCAGTCCAAAATGTTTATACCGTATGCCAACAACGGCAACGGTGGCTTCTTTCTACCGTACCCGAGTGAAATGGACACAGTCAAACGCAGCAACACGGAAGGCCATTTCCTTGACCCATATGATGGTGGCTCATCGTGGTTGAGCCTCAGCGATCCGAGCCGACTTGAATGGAACTTCAACAGACTGCGCTAATGAGGAGGGCAAAGATCAACA
>Hetgly06136.t1 gene=Hg131
AGAAAAAAATGCTTGGTATTCCATTTCTAGACGATGCCATCACCAAACTGTTCAGGCCACAAACATTTGATGATCCAGTTGATAGGCTCAATTATTTTATTACGGCGACTTTGCTCACCTTTTTTGCTCTGATGGTCTCAGCAAAACAATACGTTGGATCACCGATTCAATGCTGGATGCCCATGGAATTCAAAGGCGGTTGGGAACAATATGCTGAAGATTATTGTTTCATCCAAAACACTTATTATGTGGCGCCAGAAGAAGAAATTCCTGCCGAAATTAATGAACGTGATGAGCGCCAATTTGGTTACTACCAGTGGGTGCCAATTGTTTTGGCACTGCAGGCAGTGATGTTTTATCTGCCGAATTGGATTTGGAAAACGCTTCACCAGCAGAGCGGCGTCGACTTGGAGACGGCAATTTCGGACGCGCGAGCACTGCGCAGCATGCACTCTGACAAGCGGTCGCAAGAGATGGGCAAACTGGTACAGTACCTGAACGAGACGCTCGAGTTGCACGAGGCGCGCCGTACGCCCCGTTACTTTTTTTGCATGCGTTTTGGCCGTACCCTGGGCTCCTATGTTAGCATGCTGTACCTGGTCATCAAGTTACTGTACCTCGTGAATGTTCTCGGCCAATTTTTCCTGTTGAACGCATTCATTGGACGTGGCTATAATGTGTGGGGTTGGACGGCACTGCAATCGCTGTGGACCGGCTCGGGATGGCACGACTCGCCGGTGTTCCCGCGAGTTTCTTTGTGTGATTTTCGTGTTCGTCGTTTGGCCAATATGCACCGATACACGGTTCAATGTGTGCTGATGATCAACATGTTCAATGAGAAAATCTACCTGTTTATTTGGTTTTGGTTTCTGCTTGTGGCTGTGTCAACTCTGATCAACTTCTTTTACTGTTTGTTCTCGTTGGTGCCACCAGTGGCCCGTGAACGTCAGCTTCGTCAACTGCTCAAACAAGCAAAATTCCAGGACCTGGTCAGTTCCAAGGAAGCGGCGCCGATGCTGCACCGTTTTGCCAACTTGGCACTGCGTCCGGATGGCATTCTGTTGCTCCGCTTCATCGAAGGCCATGCCGGTGCCATTGTGGCGCGCGAGTTGACCGCCCATTTGTTCTCGGAATATGTGCAACACTGTGAAGGCATTTTTCACTCAACGGACGAGGTGAAGGCAGCCGCTTCACTGCTGCGCCCGGCGGCCGGCTCGCACAGCACCAAATCGACGTCGCCCGGCGGTTGCGCGTTTGATTATGCCGCGCTGGTGGACCCGCTGCAACCACCGGCGCCGCACCATTTGGGCGGCGGCGGTGCCGGCGATGGTGGCATCGATGAGAAGACGGCGTTGGAACAGCCGGACAACAGCCAGCACCACCAGCGCCAGCCGTTGCTTGGCAGCGGCATGAAGCCGAAGCGCGTGTGAAGGGCGCGGGCGTGCCATCAGTGGCGTTGGCGTGGTGGTGTGCCTTAGTGCCAGCCGACTGCTGGCGGATCGATCTATTCCATGTTATCATTCTTAATTAAATTACTGCCACTCGCTTGATCAATTAGTGTAATGACGAATGAGCGGTGTGATTAGGCAAATTTAATGGAACCAGTCCGACTGATCAGTTAGTTAACCAATTAGTATAAGGTATATCATAAACTATTTACTGATAATTCAACAC
>Hetgly06137.t1 gene=Hg133
AATGATGAAGAAAGGGAAGAAGCACAGCCTGGGAAATCGATGGCCAAAAAATTAAAATGGGACACGACGGGCAGTGGCAGGGGTGGCGGCGTCATTTGCGCATTGGTGGCGAAGAATGGGGGCGGACAAAACATCGACGGCAGCAGCGGAGCGAAGCCGCGGGGGGGGGGGGGGAACCACCGGACCCGGGCCGGTGGACGACCGGGGCAAATGAGTAAGCACAAAGTGTACGACGAAGGATTGGATTTGTGGGGATGGGACGGACGGATGGTGGCCAGGCAAAATGATGTGGGGAAGAGACGGGGGCAATCGAAGTGGACGCGGAGGAAACTGACGGAGAGGGGAGCGGAGGATGGGAGAAAAGGGTCATTTTTGAGGGGTCACAGTTAA
>Hetgly06138.t1 gene=Hetgly06138
ATGTTTGTTGAGATTGAGGGTCAAATAAATAATAATAAAACGCATCCAAGCAGTCAGAGGTCACATTTTCAGCACAGAACACAGCAAAGCACGACCACCACCACTCAACCGGAGAGCAAAGAACGCGGAGGCGAAGGGATAACTGACCGCCCGGAATGGCCAATTGGCGGGACTGAGTTCGGCGGCCACCGCTTGGGCGCGGTGGTGAACAAACATTCGATTCTTGGGTGGTGGAGGACACATATAATAAAATGGTTGGTCACTCCTTTTGCGCCCGCTTTGCTGCACACAACCAACAATTTTGCCGGCAGCGGAGTCCGTCGCTGTTTTTACGACGGACGGGCGACCCACGGTCTCGCGGACCATTTGCCGTCCGTCGAATGA
>Hetgly06139.t1 gene=Hetgly06139
TTGTGCCAATCGCACGACACAACAGATTTATGTGTAAAAGATGGATTTAAGCTCGGCACCGTCACATTTTTGGCAACTTCCTTTCCAAACTCGAAATTACAATGTCCTATATATGGTCGCCCATTGTCCGACTTTTCGCATTTATTGTAATTGTCGGCTTTTACTGGACAGATATTCGCCCAATGTACGCTTTACCATGACGGTAACATGACTCATTGTCGGCATTTTTGTTGTGTCTGGGCCCTCTGGCACAACCATTTCCTCCTCCTCTTCCTGAGATTTTGGCCACATTTCCATTTTCAAGCTGAACCTGTGTAGTTTTGATTAATTTTTTAAGAACTTACGATTTTTGATCACCA
>Hetgly06140.t1 gene=Hetgly06140
ATGGTAGTGAGGGTGGTTGATCAACCAGCCAGCGCCAGAGTCGCTGTCTTCAACGACTCCTCGTGGACCGAAGCGCATGACGACGAAATGGGCGAACATTTCGTTGCCGTTCGTCCGCCCCCCCCCCCCGGGTGCTGTGGCGATGTGTGCATATTTTGTGTTCCCACCATTTCATTCATTCATTCGTTCATTTTCATCGCCGTGCACATGGCGCCGGCGGCGATGGCAACCAGCATCATTTTGCACATCGGTGCTCGCGCAATGAGCTCAATGTCCGCCGCTGGCGGTGCCATTGCCGCATCCGTCGAACAACAACCGGCGGTGGAGCCAGATCGATCCACATTCTACCATAAAGATTTGTCCATTGTCCGTGCCACTGCTGGACAAATGCAGCCCAAGCCGCTGGGAACGGTTGATCAGATCAAATTTGGACATCACTTTTCTGATCACATGATGGAGGTCGATTGGTCGGACACCGCGGGATGGAATCAGCCCGAAATTAGCCCGTTGCACAGTGTTCAGCTTCATCCGGGCGCAAAAGTGCTTCATTATGCGATTGAACTGTTCGAAGGCATGAAGGCTTACCGTGGCATTGACGACAGAATCCGATTGTTCCGTCCAGAAATGAACATTGCACGCATGAAGCGTACCGCGGCACGTGCGGCACTTCCGGATTTTGATGCGGAAGAAATGCTGAAGGTCATCGCCGAGTTGGTCCGGCTTGATCGGGAATGGGTGCCCTACTCGGCCTCCTCCTCCCTGTACATTCGTCCCACATTGATCGGCACTGATCCAACGCTTGGCGTCGCACACTCGCGCACCGCCAAAATGTTCATTCTGACCGGCCCAGTTGGCACATTTTTCCCAACCGGCTTCAAGTCCATTTCGCTGTTTGCCGATCCAAGCTATGCCCGCGCATTCCCCGGCGGTGTGGGCGCATATAAAATGGGATGCAATTATGCTCCCACTCTTCTGATCGGAAAGCATGCACATGATCTGGGATACCAACAAGTGTTGTGGTTGACTGGGCCAGATGAGAAGATCACTGAAGTTGGTGCAATGAACATATTCATCTACTGGAGAAATGAATGCGGAGAATTGGAACTGGTCACTCCGCCGCTGAATGACGGACTGATTTTGCCGGGCGTTGTGCGCGACTCGGTGTTGAGCATAGCACGCGAGTGGGGCGAGTTCAGGGTCACAGAACGCTACCCAACAATGGCGGAATTGCGCCGGGCATTGCACGAGCGGAGACTCCTGCAAATGTTCGGCTGCGGCACCGCTTGTGTCATTTCGCCAATCGGACGCATTGCCTATGTTGAGCGTGGCACGGGCCGCATTGACGAGCTGCACATTCCGACAATGGCATCCAAAGCGACAGTGATGCAACGCATGTACGATACAATCAACGACATACAGTATGGCCGCATGGACAGACCGGACTGGGTTCGGATAGTGGACTGA
>Hetgly06141.t1 gene=Hg138
ATTGCCTACTTCATTGGGCACGCGGATTGGCAGGTCACCGTTTGTGTGCCACGCGAGGCCGAATGTTTGGTGATGTTTGATGCTGCGGAACGTGTTGACCCGGAGATCAGACGGGCGGTGGAACGCCGCAACGAATGCTATCGGGTGGCATTCAGCTATTTGAAGGATATGGCAACTCGACGTCAGGTCCGTGTGTTCACCCGAGTTGATGACGCAATTCGGCACATCCGTGACACAACGCCACGCCCACAGGAACACGATGGGCATCAAAATGCCAACAACAGCGCCAATTTGAATTGTGGCACTAATACTGATCAGTCATTGGCTGATCAGCTTAAGCAACATGAAAAGCCGCTGCCAAATCAAAAGCGGACCGCATTACGGCAAATTTTGGAGAAGCAACATTTGGTCAAGGAGCGGACCAGCACCAATTTGTTGGCCCATCTGCGCGAGGCGGCTGCCCGTGGCCAACGCTTGGAGTTGGACTTGGCCGAAATTCGGCCTGACGGATGCATCAGCATGAGCATTGATCTGAACCAGCTTCGACCGCTTGCCAATTGATCTTTTCATTCAAATCAATTACACTAATTGATCATTTAAGGCTTATTTAATATTAGTCTATTAATTCATCATAATAATTATTAAGCCTGACTATTACTAATACTAATCCTTTCGTTGTTTCTTCTAATTAATCATAAATTGATATTTAAAAATTTTTTCATTTTGTATTCACAACTTTATTAATTAGTTTGTATCAGTTCATTTTCAAAAATAGCAAT
>Hetgly06143.t1 gene=Hg140
AGATTTTTTTATCATTAGTATTGTTATTTGTGCATAAAGCAACGATATTACACCTCTTTTGTGCCCATGCCCATCATGTTCACATTTATCATTATAACTCAGCTGCTATTTGTGCAACAGTTTTTCGTGGTTGTTGCCAGGAATGTTAATGGGCATTATCCTGAAACATATTCTTCACAAAATTTGCTGTTTGACGACGGCGATTCAATGCCAACCGAAATTAAAACGCCATCCACCTCGGTCGGACAATTGGTGTTCAACATCCCGCATAAACGGTCCTTTGATCGGCTGGACGTGTCCAGCTTTGATTTCAACAAGCGCTATTTGCTGGATGCGCAGAAAAATACGGTAGCACCGGAGGATGTACCGTCTCCGCTCGTCAAACTGTTCTTCGGCATTCACCGGTCAACATCGGAGTTGCCAATTGTGCGCAAGTTGACAGAAGGGGCGAAGCAACGACGCTGGGCCATGCTCGGCAAGCAGTACAAGGAACTACAGGCACAGTACGATAACAAAAACAATAAAAACAACAACAACAACAATTACCGTACACTGCGCGGCGCTTGGCGACGGGGCCGTACAGTACCCAGGGTACATGGCTTTGGCATGTACGGTCCGATGAGGCTAAGGCGAAAATGAATGATTTAAAAAATAGACTGTCACCCAGCGCGGATACGATCACTTCAGTGAATTGGAAAAAATTACAATTGCTATGAAAAAATGAAATAGATAAAATATGTTGCTGAATAAAATAATTCTAATTCTG
>Hetgly06144.t1 gene=Hg143
TTTTAGAATTTTAAGACAAAATTAAAATTTCATACATTGAGAATGGTACGCTATACAGCACAAAATGTTTTGAGCCTGCTCTGCTTGCTTCAAATTCCATCGTTTTTCTTGGCATTCCAACTCCGTTTCCCGCCCTACCAACGACACATTTCATTGGCTCAATTTGCATCAATGCTCAACGAGGATGAGCATCACCCATTGGTCAACCGGCGCTCCTCATTTGATGATGGCCCATTTCTTCCGGCAATGGGAAAGCGCGCGTTCGATCGCCTGGACGCGTCATCGCTTGGCTTAAGCGGCTATAACGCCTATTGGCCGGAGGAGGAGCCGCTGAATCGGCTGGCATTTGGCCAACGACAATTTGCGGATGCCGAAACGGAGCAGGAAAAGCCGACTGGCAGCAAAAAGCATCGCCGATGGGCGCGCCCACTCGCGGGCACAAAGCGCCGAGTGAATGGCTTCGGACTGTTTGGCCAATTGCGATTATAGCGCGCCAGTCTCTGATCGATCCTCAATTTCTTTTTTTTTTGTATCGGGCCGCTTTTGTCGGATCACTGTCCTGAACTGAACTAGTCCAATAATATTATTGATCAACATTTCTGATCAGAAAATCACATTGGATTGAACCGGAATTATCCCTTATATAAGCTTTGGATTTTGATCTGATTAAATTACTTTTCTGATCAAAAAATTAAGAACTGCTAGTTTTAAGGTGTTATGTATGAGTTGACATGATCAGCTTTAAAGAACCGTGTTTGATCAGTATTTTGGCTTGTTTTTTTTGATCACTTGTATTTGGTTACGGTTCTTTTGTCTGATCGATCATAAATGTGTTATTTCTAAAATTGGATAATCAATGAAAT
>Hetgly06145.t1 gene=Hetgly06145
ATGTTCTTGCCCAACCAATTACCAACTCAGCTTAAAAATCAACACCAAAACAGTGAAAAAGGTCAAAGAAAACGGAACAAAATGCAGAGAATAATTGGGAAGAAAAAAAATGCGTATGATCGTGCCGATGAAATGTTGGCACCGCCAGCGTCGCCAACATCTGCCAGTCCGATAGAACGGCCATTGAACAGCAACAATGCCAATCTGATGGTGCGCGGATGGGCACGAATTTCGGGACGGAAACGGCACCGTCGGAAAGTGCCAAATTTGGAGAGCAATAACAACAACAGCAACAATTTTGGCGTGACAAGACGTGAATCAGGCACAATGCCGTACAACATACAGGTGGAATAA
>Hetgly06146.t1 gene=Hetgly06146
CCAAAGTCAAAGCGTAAAAGCCATTTCTTAAACACAATAAAATGCTCCCAATTTAATTGATTAAACCGTAAAAATTGAAAAAAAAAAATTTAATTAAATTATTTTTAAAATAATAATTTTTGTGCATTTTTTTTCAAGTTTTATTATAGGCTTCGAAAAATCCAGTACACTTTCGATTGCTCTGATTTAATTTAAAAAAATTTATTCTCTATGCCATTAAAATAATTTATCCAATTTCAAATTTATTTAAAATACTTATTCCATTTTAAATTTATTTTAAATTTGCAAATTTTCGAATTAAAATATTTAAAATAATCTAAATCCTTCCAATTAATGTTTAAAAATTAATCTGACTAAATTTAATTTTACGCAACAAATTTTAGGCATTTTTTAAACCGTGGCATGGACCGAATTCGGCGCTCCATTCGGCGTTCATTTCGTAAAGGCGGCTCAAGCGGGTGTCATCAATTACAGGCATTGACTCAATCATCGGCCACAGCAAATGATGGCGCCGGCGCCGGTGGTACTCAGTCGGCCAGCGAAGGGCCGTCTGCCGGCGCTGGCGCAAAAAATTATTGCCACGCGGACGAAATTGCGGTGCGTTCGGCCGCGTGCAGCTTCGTTGTGAAGTATCTCGGCGCTTGTGAAGTGTTTGAATCGCGTGGCATGTCCGTGTGCGAAAGTGCGCTTCAACACCTCAGGGCCCGAAAGCGGGTGACCAAGGCATTGTTGTACATTTCCGGGGACGGCATCCGTGTGGTTGATCAAGAACACAACCGAGGACTGATCGTTGATCAGACAATCGAAAAAGTATCATTTTGTGCGCCGGATCGAAGCAATGAGAAGGGCTTTTCATACATTTGCCGGGACGGCGCCACGCGCCGTTGGATGTGCCACGGCTTCCATGCCACAAAAGATTCTGGCGAACGCTTAAGCCATGCGGTTGGCTGCGCGTTCACTGTCTGTCTTGAGAAGAAGCGGAAACGGGACGCAGAAACGGCGGCATACCGTAATGCACAAGCGCTTGCGCATACTGTGGAATTGGACTCGGGCATTGAGGACAATTGTGGCGGAGGTGGAGGAGAATTTGCGAGAACCAATCAAGCCTACGGGTCGTTTCGCCAATTGTCGATCAGTGAACGCCGATCCGATCCACAGAAGGCAATTTTGTTGGATGGAAAAGTGCAGCAAACAAATAATTCGGTGACAGTGTCTAACAGGCACAGTATGCCGTCAATACCAACAATGCCTACGGTAACAGCAGTGTTGAATGCTTCGACACCACGGCCAAGCGGCAACCCGAGCTTATTTGAACGATCGGGCTCATTGCGTGCCCCTAACTCTTCTTCAACTGTTGTTGTTGTTGCTGCTGCAAATGCCAATGATAATGCTGTTGCTGTCGAATCGCAACAACAACAACAATGCCAACAACAAATTGTTGTTTCCCAATTTGCCCGTTTTTGTTCATTGCAACCAAAAAATAATATGGCAAAACGGTTTGGCACAATGCCAAGGATGTCGCTGCACAACGAGCCAATTTGGGAGGGCGACGTGGAGGAAGAAATTGGCATTGGCACTACCACCACAAACAACGGGGATGTGAATGGGTCAGCAAATAATGTTGTCAGCGAAAGTTGGGACTTCAACCGAGGAACAGAAAATAGCCGACAACGATTTTACCGTACATTACCGCACACAATGCCAAACATAGCGCCAACAAATTGGTGCACATTTGAGCCTTCAATTCCGACAACAATTCTGGAAGAAGAAAAGCAGTGCAACCCGAGAGAAAGCCCTTCCCCTGCCGATCCGTTTCACACAAAAATGGAAGTACAACAACAGCAGCAACAACAAACACAATGCCAACCAACATTTTTGCCGCGCTCACCTGCCCGTGCTGACTTTTGGTTGGCTGACATAATGCAAAAAGCCGCTTCATTGTCCGTGTTGGCACCAAAAACAGACGGAATGCCAATGATGGCACAACTGTTGCCCCATTCACACTCATTTGGCATCAGCCAAAGGGTGGAAGGCCAACAAAATTGGCACGAAAATGCAACAAAAATGAATGCCAGCAATAAAACAATGCCAAAATTGGCAGATACAGTAGTCTCCGACAGTAAACCATCATCAATTGATTACGGTTGCACAACCGCCAAAACATCTTCATTAACACAACAAATTGCGTGGGCCAACAGCAGCGAAGCAGCCATCAGCAACTGGCCCAACAACCCGCGAGTACTTCAAGTGTCGCCGCGACTCCCCCAGTCGCCACCGGTGGTGCTCGCCAGCGACATGGCTGACTCGACAGCGACAACGGCGAGCGCTGGTCGTCCAGCGACAAATGGTGGCGCGGCCAACAGCCGCAAACCGTCCCGGCAAATTGAGTACCAACTGTTGCAGGAGATGGAACTGCCGCACAGCCCACCGCCGAAAGGAATGCCAATGCTGGCAAATAATCAACAGACGACGACAAATGCCAATGCAAATGCCATTGATCCGTTTGATGTGAATTGGTCCCAGCGTGTGTTGGAACAATCGGCACTAAAGCTGATGAGTCCGCGCCCAATTCCGCAAAGGCGAAAAGCGAACGATGGAACAACATTTGATCAGAAAAGTGATCAAACGATGTCATTTGAACAAAACAATCCGTTCAGCAATGGAAAAACCCCGCCTGTAAATGCTTAGAGTAATAATTAGGGCTAATGATTTTTTTTTAATTTGTAAGTTTATACTTTTAAATTCAGCCCTAGTGATTGTTTGCATCTGTACAGTGCTTGTCGCTGATCAGAGCTTTTATTTTTATATCTTTGATTTTTTCTGCTTAAATTTTGAATACATTTCTTTTCTCAATTATTTAATTTTGAAATATATTATTTTTAAAATATTGGCAAATGTAAAAATAATGATG
>Hetgly06147.t1 gene=Hetgly06147
GTCATTTTGATTCATTTGATTGTTCGACACACTCCAAAGCAATTGCGCATTTACAGCAAAATTCTATTGCAAATATGTGTGACTGACATTTTATTATTAATGATGACACTTCTCTTCTGTCCGTATGCAATTACGACGGAAAAATGCGAAACGGAGTCAATTCTGTACGGATTGATCACCATAAAAGGGGTGGAAAATCGAATATGGAATGTGTTGGCATTAATTTGTTGGGTTTTTCTTCTTAATGTGTCCATGTTTGGCTATGTGTCACAATTTATTTTTCGCTATTTGATCCTTGTTCGTGGCAAAAAAATTTCGTTCCTTAAATATTTTTTGCTGCTTTTTCTGATACTTTTGTTCCCGTTTGCATATTGCGTTAATATGTTCATTTGCTTTTTTCCACCTGCTGATCACGCAATATTGGACGACAAATCTGTCGCGGAAATTTTGGGCATAAATCTCGACGACCAAATTATTTTGGCTGCATATGCAATTAATGATATCCATTTGGCTTTTAGTTTATATTACCTTATCATTATAAGCACCGTTTCATCTTCTTCTGAAATAGCCAAAAAGATGATTGAAGTGAATAAACAAGTTTCTCGAAATCTCATTTTTCAGGCTTCTATACCCATCAGCATTTATGGTTCATTTATTTTTCAACTTGTGTTTCTGCTTTTCAATATTGATATACAAGGATGGGATTGGCTTCTGTATTACAACACACTCTCACCTTTCCCAATTTTTTTACCGTCCGCTTTAAATCTAATCGTATCATTTTGCACCATCAATGCTTACCGTATCAAATTTGTTTCGAACATAAAATGTTTCGGTATGTGA
>Hetgly06148.t1 gene=Hg145
AGATATAATACTATATTAAATTGCACTGCTATACAAACAAATTTCATTAAAAAACCTTCATTAAAGCATTTTGTGCCATAACTGGTTATGCAGAATTTGTTCAGCCTACAGAACGCGATGCTCAACATGACGTTACCAATAGCATTTGAAAATCAGCACCAGCAGCACATTTTTGAGCAGTTCAGTGCTTCTTCACAGATGCGTAATGACGCATTTTTTCTGCCAACATTGGCTACCATAATGAACCAATCCGCAGCAGTTGCTGTGTTGAGGAATCAACTGAATACTGTAGCCGAGCAGCAGCCAATGCAGCGATTGGGACCGTTGGAACTATTCCTTGGCACAATGACCTATTTGGTGATCATCGGCATCACAATTCTCGGCAACACTTTGGTCATCCTGGCCGTGTTCAGCTACAGACCGTTGAAAAAGGTGCAAAACTACTTTATTGTTTCACTTGCTGCATCGGACATGATGGTCGCAATGCTCGTAATGCCATTGCATGTCGTCAAATTCTTGGCCAATGGCCAATGGTTGCTCGGTGTCACTGTGTGCCAACTGTTCACTACGGCGGACATTTTGTTGTGCACATCATCCATTTTAAATCTGTGTGCCATTGCCATTGATCGCTACTGGGCCATCCATAATCCAATTGCTTATGCGCAAAAGCGTTCGTTGAAGCTGGTCGGCGGAATGATCATTATGGTTTGGGTGGCCAGTGCGGTGATCTCTGTCCCGCCACTGATCGGCTGGAATGATTGGACCTCGCAACAGCTGGTCGATCACTGTGAGCTGACATCGGACAAAGCATTCGTTGTGTTCTCCGCTTGTGGCTCATTTTTTCTCCCATTGCTCGTCATGGTCATTGTGTACATGAAAATTTTTTTGAGCGCCCGAAAACGGATCAGAAAAAATCGGGGTCGCAGTGCGCTGTTCAAAATGTCTTGCGAGCTGGCGGATATGCAGCCGAAGCACAAGCGTTCCCATCGCCTTCCGGTGGCGGCAACGTCAGTGATTGCGCTGGCCAGCGCGACCGGTGCACAAATTTTACGGAAGCGAACACTGACGAAGGCTCCATTTCCGGATAAAAGGGGCGTGGTCAGCGTTCCGGACGTTGTGGGCGTGCCCATTCCTCACACAGTGGGCGGAGTCAACGCAAAAATGCCTCAGGGAGGCGGCGGAATTTGCCGCTTGACCGCGTGTAGTGCCTCAATGCACTCTTCCGTGTTGTCCTCATGTTGCAGTGTGCAGCAGCCGCAGTTGTACGTGCCGAAGCTGGCGCTGTACATTGATGGCATTCAAGCGGAGGAGGAATTGGACGGGGACAGCGGACACGGGGGCTCAAATAAAGACAGTCCCGAGAATACGGTAACTGTCCCAGCGTCTACGGTGCTAACCACCGCTCCAGCTGCAATTAGTCATTCGCCTGCTGCAAAAAGTCACTCGCTGGTGCCAACAGTCGCTGCCGCTCCATCAATGGTCGCACTGACGAGCTCCGCGAGTATGATGGCAATGGCGAGTGGTGGCGAGAGGACGCCAGCTGAGAGCGGCACGGAAGTGGCGGCCCACAAAAAGGCAACAAGTGATACGGTGGAGCTGAAAACGCACCTAAAAGAGCGCGAAAAGATCAGTGTGGCCAAGGAAAAGCGTGCCGCCAAAACAATTGCAGTCATCATTTTTGTGTTCACATTTTGCTGGTTGCCATTCTTCTGCGCTTATGTGATCATGCCTTTCTGTACAGGCTGCTATTTGCACCCAAAGGTTCACCAAGCGTTTGTTTGGCTCGGCTATATCAACAGCTCGTTGAACCCATTTTTATATGGCATTTTGAACTTGGAATTTCGGCGGGCATTTCGCAAAATTTTGTGCCCAAAGCGTGTGCAAAATGCGCAGCGACGTCGGCTGTCAGAACAAGCATCTGTCAGGAAGAAACCCGCGCCAAACTCATGATCAAACTCATTAATTTTATGTGTTATTTTAACAAATTAATTTTTACTTCAAATAAAATAATAA
>Hetgly06149.t1 gene=Hg146
ATGTCTGGTTCCTATTTTGTTTTGGCCGAATTTATTTTGGCCATCATTTTCCACTCGGTTACAATTGTGCAAATCTTTCTGCTCCTTCGTTCAAATGTGCGCAAGAATATTTCGTTGTTCTTCATGGCATTGTTGGTCAATTGGTTGTGTGCCGCACTTTTGCTGTTACCATATGAAATTCATGCAATCATTGTTTGGCACCCAACGGAAGGTACGCTTTACAATGGTGCCACACTTTTCTTCATAGCGCTTTCGGCACATTTGCTGCTCTCAACCATCCCAATGTCCGTGTTTTTCATGACCATTGACCGAATTTGTATCATATGCTTTGAGCACAATTATGGCTCTCAGATCAAGCGTCGCTTTGCGGTTGGCATTCTGTTCAACTTCATCGGAATGCTCTCGGCAATGCCGGTGCCAACCAAGACGGAATGTGAAATTTTTGGATGCATTTTTGGCACTTCCGTCCAATTGTACCTCGGCTGGCGGGCATTTTGTGCCATTTTGAACACAATCAGTGGCATTTCGTTTTTCATCATTTTATACCGGTCCAATCGTAAAATGGCGTCCACAACAAAAATGCTAAACACTGCTGGACAATTGCAAATTCGCCGTGCAAATCGCGCGGTTTTTGGTGCCGGTTCATCGCTTGGCACAGAACCTTTGTCCGAGTTGATGAACTCGTTCGAAGTTTTGTTTTTTTCTTCCATATATTCGTACAAGTTTTGGGCACGGAACAACACATCAATGCATGGCACGGGAGGAACATTTAATAACAATGCCTCATACCGTATGGAGATGAATTACAGTAGGCAGAATATGGAACGAAGACGGGCTGACCGTGTGGTACCATTGGCACCGGGACAACCTCAGCCGGCACAAATCCTCATCCGCCAAGTTACGCCAGTTGAGAATGTAAACGGCAGGCCTAGAACATCGATGGCACGCTACTGA
>Hetgly06150.t1 gene=Hg149
ATGAGCCACCCAATTTGGCAAATCGGTCTTTTTAACCGAATTACCGAAGATTCGGTCGAGTGCTTGGAGTGTAAACAAAAAAACGTTTGTAATTTTGCTCTTAAATTGTCGAATCGGAGTATCAAAGGGCTCAAGACCCATCTGTTTGCCAAGCACAAAGACACGCCGTATGCAGAAATATATTTAAAACTGGATGAAGGCAAGTCAAAGAAGGATGGTCCAAAAATCACAGATTATACAACACGGAGTTCGGGCAAATTAAGTGTGATGGACAAGGACATTATCAATTTTATTGCTTGTTGCAATTTGCCGTTCCAAATAATCAACCACAAAACTTTCAAAAAATTGCTCCGAAATCCTTCGGAAAATTTACGCGACGAAAGCCATTACCGAAGAAATGTTCTGCCTGAAGTTTACAAAGTTGTTAAAAACAAAATCAAGGGAGAAATTGCTGAGTTTGAGAACATTTGTTGTACCTCTGACATTTGGACTTCGGATACAACAAAGGATTCCTTCATAAGCTTGACTGCTGTTGGTGTTAGCTCAAAATTTTCACGCAAAAAATTTACACTCGCTATTCAAAAATTTCATGGGGCCCACACTTCGGAACGCATCGCTGAAATTCTAAAAGCTCTTCTCGAAAATTGGAATGTAAAAGAATGCCATTGTTTTGTGACCGATTCGGCAGCAAATTTAGTTAAGGCATTGGATTTAATGTACATTGAACGAATCAGCTGTGCCGCCCATGACCTCAATTTATGTGTAAAGGAGTGCTTTTCAAAAGAAAAAGACGAAATGGCACAAATTTTCGAAAAATGTCGAAAAATTGTTGGAACTTTAAAACATTCGGCAAAATTGATGGATGATTTAAAAGATGTTCAAGGCGAACTTGGGCTACCGAAAGCTAAATTGCTTCAAGACGTAAGTACGAGGTGGAATTCGACATTACGTATGATCGAACGTATGCTGGAACAGTCGGCTGCTGTTGATGAATTTTTGGAACTTCTAAAGCCCACCGAAGAAGTCTCTTTGCATTATTGTAAAGAAACACTCTCCGCCCGAATTCCGCTCGCTCGCACTTTGGTCTCCACTTTGGAACGAGTTGATCTTTCAGTGACAATTGATGGCGACATCAAAATAATTAACGAAGTTGAGGAAATGCGTACAAGGCTGATTGAAGCGGTTAAAAAGCGTTTTTTACAAAAAGATAATAGACTTTGTATGTTGAGTACTTTTCTCGACCCTCGCTTCAAGGATCGTTTTTCCGATGAAAGTGACATATTTTTTGCGCGCGTTTCACGTTTTTTGAAGGACGAAGGGGCTGAAGAAAATGACATTTTGGAAAATTTGGAGGATGAAGTGAATTCGACTCGCATTTCGCCACCAGCCAAGCGCGCTTGTTCAATTGTTGAGATAATGCAGAACATAGCCAGTTGTACCAAAAAAGCTACATCATCTCAAAATAAGGGCATGTCGGAAGAAATTCTCTCATACAAAGAGGAAATTTGTGTTTCAATGAATGCTGATCCCTTGCAGTGGTGGAATAGCAATGAAAGAAAATTTCCTAAACTTTCAAACATTGCGCGTCGTTATTTGTCATCACCATGTACAAGCATTTCAACGAAATGTTTGAGCTGTAGTTATTCTTACGGCTCAAAGTCTACAACTTTTCCGAAGACGTGTCTACGAGAACATTTGCAGCGACATCATCCGGACAAATATGATGAATTGTTGAAGGAAGAGGAAAAAGCAAAAGTGAAACCAAATGGCCAACAATCAATTCAAAGTCTTTTGTTGGCAAGTACAAGTACTGGTCGCTTGTGCTTGAGCTCAACACCTGCCAAAATGCCAAGAAATGAGTCGCCGTTCTCTTCTTCACAGCCATCAATCATCAAAAGCTTTTGGTGGGAATACAGCGAAAAATTATTGGTCGCAACACTGCTTGACTTTGCGTACAAGGGAGCCTTTTTCAAAGATGCTGTCATTTTTGAGCGTGCCAAAGATATGTTGCTTAATGAAGCAGAAAGAATTGCCATAAAATGTATTGAGTTTGACACCAGTGAATTGTTAGCGATGCCTGAAATTGAAGCGACGGAAGACCCATTTTTGGCTTTTGGAAACGACACAGTAGAAAATGACAATAGTTTTCTGCTTCCAAGCACTCCAACACCATCACCATCATTGGCTAGTGCCAAGGCAATGGCAGCTGGGGTAGAATATTAA
>Hetgly06151.t1 gene=Hg149
ATGTGTGGTTTGCTGAGCCAAGTGCTTAATGAGTATGGTGTGAACGCTGAAAAAGTGCACCTTATTGTTCGTGACAATGAAAGCGCAATGCAGAAAACGACTCGTATTGCCGGATTTGAATCACTACATTGCACTGCCCATAATTTTAACTTGGGAATAACGGTCCGGTGGAACAGTGTTTTTCTAATGCTCGAACGATTTTACGAAAATGAGGAGGCCCTGGTGTTAATGCCGGCAAAAGACAAAAGTTTTCCAGTGTTTTCACCGGTTGATTGGAAAACAATGAGAAGCATTTGTGAGCTTCTTCGGCCAATTTACCGTGCGACCTTAAAAGTCCAATCAAGGAAGGCTGGACTTTCATCCGTGGTCCCTTTACTAAAATACATCGATTTTGAACTTCGCCGTCTGAGCACCGATTTTCCGGTTATACGAGACCAATTACGGACTTCGTTTGCAAAAAGATTTGAAGGCAAATTGCTAATTATTTGATTGGTTTTAAATATATTTTAAG
>Hetgly06152.t1 gene=Hetgly06152
CAAAAACACACTTTAAAAAAATACCAAAAAATATTTTTAATTTAAAAATTAATTTACGAGGTAAAAATGAATTTTCTCACGAATGTTGCTACTGCCTTCATTTTTATGTCCACATTGTCTGGTGGGAGTTGTGGAGATAATGAAGCTGCTGATGAAAATGGTGATGGTGCCACAAATGTTGGATACATCCGTAAATTGTCAAATGCCGTGGTTGGTACACTTGGGGCGATGGTCTCGATAACGGGCGCATTTGGCATAAATCAAAATGGGAACGGCACAGAACTTGCATTGGCACAAAACGGGACACCATGGCATTTGCAAAGTGGCATCGAAATGTCGGCACGCATGCCGATTTTTGAAAAGGTCAATTATCCAAAAAGCCCAAAACGGCACTATTGGGAAGTTAAAAATGGCATAGAATTGTCATCACTAATGCCAAAGTTTGAAAATGGGAATGGCATAGGAAAACAGCAAATGCCAATGCCGCCAAATACCACGAACTTGGTGATGATGAATGATGGTGAACAGAAGCGGTCCAAGAAACATAAACACAAAGGCAAGTCTCATCACAATGAAGGCATGAAACTTTTGGGCGACTATGTTGCGCACGATCCGACCATGATCCAATTGGCGGACCGCTCTTTTGTGGTGTACTCCACTCACAATGGCATGGAAGCTCGCCTGTCCAAGGACATGGTTTTTTGGACACGTAACAGTGCCGTTTTTCCAAAAGGATTGGGCTGGGCCAGCAAGTTGGCAAGAAACAACGAATTTTGGGCACCCGACGTTTCGGGGCCGTACGGCGAGGGCAAGGATAAGAAATATTGGCTTTTCTACTGCGTGCCAGTTGACGGCACATTAATGAATCCTCAGCAAAAGCTCACTCATACCGCGCTGATTGGACGGGCAGTGAGTAGCAGTGGTCGGCCGGGCACTTGGCAAGATTTAGGACGGATACTTGAATCTAACGAAAAAGACAACTTCAATGCCATCGACCCTAATTTGTTTGTTGATCCGAGCACAAAACGATTTTGGCTCCAATACGGCTCCTTTTGGATGGGCATTTTCCAAGCTGAGCTGAACCCCAAGACTGGTGCTCTGCTGAACCCGAAACAAAAGCCGATTCATCTTGCAACAAGACCGAACGTACCGGACCACGCTGTGGAGGCACCGTTTCTCTTCAAGAAAGGCAATTGGTACTATTTGTTTGTCTCATTCGACCGCTGCTGTGCCGGCCTTTCCTCCACCTATACAATCCGTGTTGGCCGTGCCAACAGCCCAAACGGACCGTTCAAGGACCGCAACGGCACGCCAATGACCCAAGGGGGCGGCACCCTTTTGTTGGGCGCTAATGGAGCAGAAATTGGGCCCGGAGGTCAAAGCGTAATGACCACCGCTGATGGCAAGGATATATTGGTTTACCATTACTATGACAAAAATGCCAACGGTTTGGCCAAACTTGGCCTGAGACAAATCAAATGGGACAATGCGCACTGGCCAACCGTTTGATTAGCAATGACTGTTAATTAGCGATCGGAAGAAATAAAAGAGGAAAAAGATGAAATAGTCAAAATTAAATGAATAAGTGAGAAATAAATATATTGGTGATATTTCTGATAAATTGTTGATGATTTCATTAATTGTGGATGAATTATTAATAAATTAAATTCACTTAT
>Hg151.1 gene=Hg151
CAGAGAGCATGGGAGTACAATGTCGCGCAGCATGAGGAAGGTTGAATAAACGCAGGCGACTCGAATCCACCATGTATTGCTTCGTCGATCAGGCCTTTTAGCCAGCGCATGGTGAATCCTTCTATTCCGCCCTTCAACGCGCCCAAAGCTTCAGTCCTTGCCGTAATGTACTGTTCCAGCTTGTCCTTGAACTGCTCCGAGTTGATGAATTCGTTGATGTGCGTGTCGCGTCAGACTCATTGTCGAGTTGCCATGCGTGGAAGATCAATGGATGAAGTTCCAAATTGCTATTCGTTTGGTTGATCGTTGTTTCGTACAATTCGTGGACGTAGTCCTTCGGCATTCGTCGTGCTGTGCCGGTTCGAGAGTCAATCCATAACCAGATGTTGGGATTGCTTCGCAGTTGAAGATGATGGAACCGGTAGCTATTACAGCTTGCCTGTTGTGCTGTCAGCGAGATGATGCGAAGTTCCGGATCCAAGAAAGCTGCGATCGCTCGGTCGGGAAAGTGCGCAGTCACGGGAATGTAGAGGCGACAGTCATTCATTGGCCTGTATGAGATGTCCTGTAGCGAAATGTTGACACATGGAAACACTTCCATTGTCGTTTCGCCGATCCAACGAGCTTGGATGTTTGGTTGCCGTAGTAAGCGTCTGGCCTGGAGAGTCGGGTTGGCTGCCCTCGTGTTTCGCTGACATTCCCTCGTGTAGAGCTGATTTAACGCAACGCTTGTTGCCACTTGGGATGCCGAGAGCTGTGATGCGAGCTGTTCTGGTCGGATGCCTATTTCCATCTTGTCGTGGTGCTGACAATGTCGTCGTATTGCTCCTTGGCAATTCCGAAGTTCTTTTCGGACATGACGATGCGTGTGCCATCGCAGGCGATGAGTTCTGGCGCATTTTTGGCGAAAGTTAATGCCTTTTTGTGATCTTCGGAGATCCAAGTGGCCATTGATTCTCCGTAGGCCGCAGTGAATTTTCCGTTGATGACTTCCGCCTTCTCGTAGTCGCATGTTTGGCATTCGTTGCCATTGCAGGTTGATTTCCAAATCAGGGTTGAGTTGTCGGACAGTTGGCAGAATTCGGTTGCGTATTGACAGTTCTGAACTTGGTGGACTGGCGAAAACATCTGCAGATTGTGCCGTTTTACGAAAAGTGTTGCTGGTTGAGCAAACAGTTTGTCGCCGTGCTGATTTGTTCGCCTTTGAAAAGTCCGGCGATTGGTCCAGGGAAGTTGACTTCCAATTCGTCATTCGTTGACCACAATTGTGCTTCGTGATTCGTCATTTCAGACTTGGCGAATGGGCATTCCTGGTGAATGGCCATTTGTTTGCAGATCCGCTTGTTGACCGGTGGAAATTCCTTCTCGATGGTGACGAACTTATCGGCCAAAAGATTAGTGTAATAACGCTCCGTTTGCTTTTCTAGTTTAATGTCTTTGCGGACATTTGTTGTTTGGTTGGTTCTTTAGTTTAATGTCATTGCGGACGATTGTTGTGTGGGTTGGCCGATGCTTTGCTAGTTTAACGTCATTCCGGACTCGTGGCAGCCGGGTGATTAGCGTTTCGGACAGTTGTTGATGGCTTAGGCTAGTTTAACGTCATTGCGGACGATTGATGGTGATTAGCTTAGTTTAACGTCTTCTCGGACGAGTGCTGTTGGCATGGTGTCTTACTAATTGTTGCCGAGCTCATGTTTGGGCAATTCTGTTGACTGCCCTTATCAATTACTGTTGTTGAGTCCGAGCTTCTGGCCAATGTAGCGACGCAATGATGGTTGGCGCCTGATCCACTTGCGGTTGGCGACAAGGCTTTCATTTTTCTGTTGAGTTCATTTGTTTGGCTTGTTTGTGCGGGATTCGCTGCTTTTCCTTTTGGTTGTTTGCTGGAAGAAAATGCTGGTCTCTTGGCAACTGATGAACTCTTCCTTGTTGGTGTTAGCCGTTGCACTGCCATAGGAATTGGTGCCGTTGAATGCTCATTTGGTGATTTGGCTTGTCTATCCCTGACTGGATTTTGTATGATCTCAATGCCGGATGCGTCGCTGTCTGATGAAAGATCAATCACGATTGATTTTGAGCTGATGGGAGCCGATTCTCTCTTCCGTCTTGATCGCAATGTTGCAATGCTGGACAAGAGTTTGTTGCGTTGATGCCGTCTCAGTTCGTCCTTTTCTTTTTGTTGAATGTTTTTCTGCCTCTGAGCCGCTTTACTGCTTTGTGGCGATTCATCGTTGTTGACCATTAGGACGAAAGAGATGTTGGACGGTTGCTTGAGCTCGATTCGCCCTGTTCCACTGATGATATTGCCGATTTTCGATTGGCAAATCGTAAATCCGCTTGGCAGTTGTTCAATTGGTTGAACATTCAGCTGGTGCCAAACGTCCATTCCGAGGAGAATGTCCGGTTGCCGTGACTCATTTGGCAGGGAAAGCTTCTTTTGTTGAAGTTCGTCATTATCCAATGCGTTTAGTTGTAGTACCGGCAAATCATTCAGCAGGAACTTCAAAGCGTTCAGGTTGAAAATGAACCTGTCCTGGTCGGGGCATAAAATGCCGATTGCAACGCGGTCGCTTATGTATCGCTTCGGTTCTCGTTCACCGAAGCTGGACAAGTAGCATTCTTCCGTGCTGAGGACGTTCAGATCCAATTGTTCAGCTGCACTGCTCGAGATGAATGATCGGTGGCTTCCCGGGTCAATGAAGATGGTTCCCATCATGCTGAGGGATGGCCGTGACGGATTGAAGATCGTTGCTTTTGTCGTCATTAGCAACGCTTTGGTTTCCTTGCTTTGGATGGCATTACACATTTGTTGTTGTTCGATCACTGTTGATCGCTTGCAATCGTTGGCATTTGGCTTCTCTTCACTGCAAGAGGTGCTAGGCGTGTTGATGCCATTCTCGGCTTTGTACTGATCTCGGCAGAGTGCCGTGGGATGCCGACGTTTGCAGTGATAGCACTTAGATGGTCGAGCGCAATTTGATGCGCGGTGGTTTGGCTTCATGCACTTGAAGCACAGCTTCTTTTCTCTGACGATGCTGATCCGTTGGTTGAGTGTGTCGACGTTTTGGCATTCGTCATGCCAATGATTGCTGTTGCAGAAAATACAGGGGTATGGCGGACCCTTTTTGACGCTCTGTACTTGGTTTCGCATTTGTTGGCAGTGTTTCTTTGCTTGTTGTGTGTGCTGTTGGCTTACATACCCTTGATGTCTGTGACCCTCGTCCAGTGATGAGGCGATAAATGTCATATCACGCAGTGCCATTGGTTGGTTAGGCCTTCGTGACCTTTGGTTTGGTGTTCTCGGTGCTTGTACAGGTGCTGCTGAGACGACTTCTGCTTTTGGTTGGACGTAGTGATGGCCATATTCTCCCATCACTTCTTGGATTTGGACTTCTTTCCGGACTGCTTCGGTTAGCACATCCCGGAATTTGGTTGTCGTCCAGTTTGCCGGATCCTCTCCTTTCTTTGTGAGGATGCTTCGTAGGAATGGTGGAGTCAGCTTCTTCTCCAGCATGAGGAACACCTGCGGTCCCTCGATGTCCTCTCCGGCATTGTTCAGCTCCCTTGTAAGCCGCTCAAATTGAAGCAGAAAGTCTTTGGTCTCACGGAGGCTTCGGCACGGCTTGAGATTGGCCAGTTCGAAGTGAAGACTTCTGATGTGTTCCTCCGGAGCTCCGTACGTGTCCTTTAACAGCTGAAGGACCGTCTCGTAGTTTGCGTCTTCCAACCGGAAGCCCGCTATGAGTTCTCGCGCTTCTCCGCCCAGCAGATTGCGGAGCAAGTTCAGCTTCTGCGCTTTGCTGATTGATTGACTGCCGATTGCCGA
>Hetgly06153.t1 gene=Hg152
TCACTTGTTCAAAAAATGCCCAAGTTATTTTTACTAATTATATTTTTAAATGCACTGATTTTTGGCAAAGCGTCACAAAATTGTGCTTGGCAGAATTGTAACAAATGGTCCACAAAACCGGGCGCAATCAACGTTCATTTAATTGCTCACACACACGACGATTTGGGTTGGCTGAAGACGGCCGACGATTACTACACGGGAACAAAAGCTGCAATTGTTCCGGTCGGTGTACAGTTCATTCTGAATACCGTAATTGAAGAGTTGGAACGCGATCCATCTCGCCGCTTTTCCTACGCTGAAACCGGCTTTTTGCACCGGTGGCTGATTGATCACGGAGAAAAGCAACGCGCGGCATTGCGCCGGCTGATCACTGAGACGGGCCAACTTGAACTGATCGGCGGGGGTTGGGCCCAGCCGGACGAGGCCTGCACCCACTATTTGGACATCATTGATCAGTACACCATTGGACTCGACTTACTCAATGCCAGCTATGGCGATTGCGGACACGCCAAAGTGGCCTGGCAAATTGATCCATTTGGCCACAGCAGGGAACATGCCAATTTGGCCGCAATGATTGGCTATGAAGCACTGTTCTTTTCACGTATGCACTACATTGAATTGGAAAAACGTGCAGAACAAAAAGCGCTGGAAATGATTTGGAATGTTTCCGATGACATCAAAACAAATATTCTCACCGGCGGCTTTTTGCGCGGGACTTACGCGGCACCTGACGGATTATGTTTTGATGCCTTATGTGGCAATGAACCAATTGTGGACAATCCTGCCTTTAGCAGTTATAACCTAGACGCAAAATTGGAAAGATTTTACAAAGAAGTGCACAACGAAGTTTCTGTACGACCAAATTGGCTCAGTGATGAAGTTAAGCATGTGATGTTAACAATGGGCGGTGATTTTCATTACACAAATTCAAATATGTGGTTCACACAATTGGACAAACTGATTGCTGCCGCAAATAAACAGACTCTGTCAAATAATATCACCGTTTTTTACTCAACCCCTGCTTGTTATGTTAAAGCGTTGAATGAAGCACAGCCAAAATTACCAATTAAATCTGATGACTTCTTCCCATATGCAAGCGCCAATCATTCTTATTGGACAGGCTATTTAACTTCAAAACCGGGCATCAAGGGACTCATTCGAGCTTCAAGTGCATTTTTACAGCTTTCACGCAAATTTGCATCATTTGCCCTTCTGTCAAATGCTTCTAAGCAGTTGGAAAGTTTGGAACAAGCTCAAGCATTGTGCACACATCACGATGCCGTGACTGGGACCAGCAAAGAATTTGTGACCCAAGATTACAATCGACAACTGCTCAATGGCTGGCAAGATGCTGAAAGTGTCCTCAACGCATCCTTTTGGCATTTGGCCACAAAAAATGGGCCTGCCAATTCAAATCCGTCATTACATTTTTGCCGGCTTAGCAATGAAACTGTTTGCGAGGCCACAAAAAATTTTGCCAATTTTACACTGACTCTGTTCAATGAGAACAGTCAACAATTTGACACAATAATTCGAGTGCCATTTTATCGCCGACGTGTCACAGTGTTTGATGATCAGGAAAAAGAAATTAATGCTGAATTGATAAAATCATTTTGGCAACCTTTTCCCCATTCTTCGCATCACGATGCGGCCCCATATGAACTTGTTTTTCCTGTTATTGTACCTCCACTTGGCTTTCGCACATATTTTGTGTTTGGAGATGGCCAAAAACGAAAAAAAATTATTTGTCCCAGTGAGAAAAACAATCTGAGGACAAGCAAACGAAACAACAATGAACAACAACAAAACCAGCAGCAGCAGCAAAATGATGGTGGTGACGAATTGACAACAATTTCAAATGAATTTTTCCGACTGACTTTTGGCACCGATGGGCTGCTTCAAAGTGTGGCAGATTTACGCCGGAACCAAACTGTTCAACTTCGGCAACAATTCTTGTACTATCATGGCATGTCCAATAATGCAACACCAAGACAGGCCTCGGGCGCATACATTTTTCGTCCAAATGGCACTTCGCCATTCACTTGCAAAGAGTCCATCCAATTAAGCAAAATTAATAATTTGTTGGTCCAAGAAGTCCGACAAATTGTTTCGCCATGGATAAGCCAAGTTGTTCGACTTGTTGCCGGAAAACCGTACATTGAATTCGATTTTACAGTAGGACCTCTTCCAAAAAATTTGAGTGACCTTAAAACAATTGAAGTGATCACACGTTACACAATGAGCGAACTAAACTCTGAAGGAATTTTTTGGACTGATTCAAACGGACGGCAAATGATGAAAAGACGCCGCAATGATTCGTCATTCTTTGAGGGCACCGAACCGGTGGCAGCCAATTATTACCCAGTGAACAGCCGAATTTATGTACAGGACGACAAAACGCGGATGGTCATTTTGACAGACCGGTCCCAGGGTGGCGCTTCACTGGCGGACGGACAAATCGAATTGATGCTTCATCGCCGCGCTTTTTGGGATGACGGATTCGGCGTGGAAGAAGCTTTGGACGAGCCGGGCGAGGACGGCAATGGGCTAATCATCCGAGGCCGGCATTGGCTGTTGCTTGGCGATGCTTCATCGGCCGCGCATCGACCCTTTTCCCTGGAAATGTTCCAAATTGGCGCCCCACAAATGTTGGCATTTTCGCCATTTGTTGATGGAGACATTATGCAATACAAGGCCAACTATCGAACACAGTTTTCCGCTTTGGCACATCCAGTTTCGCCAAAAGTTCACATTTTGACCATTCGTCCATCGGATGTTGACCCCGTTGACTCCGTGCTGCTACGTCTTGAACATTTTTATCAGAACAACGAAGAAAATTTGGGCACTTTTAACACAACTTCTGAGCCTGTTCAAGTGGACATTCAGAAATTGTTCGCCCCCTTCTCGGTAATTTCCGGTGAGGAGCTGAACTTGGCTGCCAATAAGCTGATGCAACAGAATATTGGCACTTTGATGGTCCATCTTCAACCCATGCAAATACGCACTTTTCGTCTTCAAATTGAGGCAAAAGCAGCAGCGCAATAAATGCCGAAAAATATTTTGGCAAAAATCTCATTTTATGCAAAATAATGAAAATAAATTGTAAAATGAATTTAAAAAAAGGAAAATAAATATGCGACACGA
>Hetgly06154.t1 gene=Hg153
CGCACTCATTAAAAATGTCTGGTTCCTATTTTGTTTTGGCCGAATTTATTTTGGCCATCATTTTCCACTCGGTTGCAATTGTGCAAATCTTCCTAATCCTTCGCTCAAATGTGCGCAAGAATATTTCGTTGTTCTTCATGGCATTGTTGGTCAATTGGTTGTGTGCCGCACTTTTGCTGTTACCATATGAAATTCATGCAATCATTGTTTGGCACCCAACGGAAGGTACGCTTTACAATGGTGCCACACTTTTTTCCATTGCGCTTCCGGCACATTTGCTGCTCTCGATCATCCCAATGTCCGTGTTCTTCTTGACCATTGACCGAATTTGTATCATACGCTTTGGACACAATTATGGCTATCAGATCAAGCGAGTGTTGAAGCTGTCCTTTCTTAGCGCTTTGTTGGTTGGCATTCTGTTCAACTTCATCGGAATGCTCTCGGCAATGCCAGTGCCAACCAAGACGGAATGTGAAATTTTCGGCTGCATTCTTGGCACTGCCGTCCAATTGTACCTTGGATGGCGCGCCTTTTGTGCCATTTTGAACACAATCAGTGGCATTTGGTTTTTTGTGGTTTTTTATCGGTCCAATCGTAAAATGGCGTCAACAGCAAAAATGTTAAACAATGCTGGACAATTGCAAATTCGTCGTGCCAATCGCGCGAATAATTTGCTGACATCCGTTGCAATTGTCAGTGAATTGTTCCTCTCATTTTTGCCGCATTTTCTTCCATTTATTTGGGAAAGAATTTTTGGTGCCGGCTCATCGCTTGGCACTGGCCCTTTGTCCGAGTTGATGAGCTCGATCGAAGCATTGCTGTTCTCCTCTATATATTCGCACATGTTTTCGGCACGGGACGCCACTTCAATGCATGGCACGGGAGGAACATTACAACAGCAACAACAGCCATACCATATGGAAATGAATAACAGTAGGCAGAATATGGAACGAAGACGGTCTGACCGTGTGGTACCAATGGCACCGGGACAACATCAGCCAGTACAAATCCTGTTCCGCCAAGTTACGCCCGTCGAGAATATAAACAACAGGCCTGGGACCTCGATGGCACGCTACTGA
>Hetgly06155.t1 gene=Hg154
ATGTTGGCACGGTGCCATTGGGTTCACACGGTCAGACCGTCTTCGTCCCATATTCAGCCTACTGTAATTCATCTCCATACGTGTCATCCCGTGCCGAAAACATTTGGCACTGAAGATGAGAATGATTGGAGAAAGTTTGTTGTGACAATCCAAAGGACGGAAAATAACAGAGTACCTACAATCGCACATGCCAAAATAAATGAAAATATGGAAATGAGTTTATGGCGTGAAGGATTTCAAAAAGCAGAAACATTTGATATTGAAACAGAAGCTGAACCACTAAGCGCTGTAAAATTAGCTTTGGATAAGGAACTTACGGAAGACGATAAATGGGTACATTATCGAAATAGAGAAGTGATAATAAAGGAGCGATTCATAATTGGATAA
>Hetgly06156.t1 gene=Hg155
GTGGCAAAAAAATTTCCCTTAAATATTTTTTGCTGCTTTTTCTGATACTTTTGTTCCCGTTTGCATATTGCGTTAATATGTTCATTTGCTTTTTTCCACCGGCTGATCACGCAATATTGGACGACAAATCTGTCGCGGAAATTTTGGGCATAAATCTCGACGACCAAATTATTTTGGCTGCATATGCAATTAATGTAACGGTAAATCAATAAAATTTAAAAATTCGTTTTTTTATCTTGGACATGAAAACCAAATGCGTTTCATCTTCTTCTGAAATAGCCAAAAAGATGATTGAAGTGAATAAACAAGTTTCTCGAATTCTCATTTTTCAGGCTTCTATGCCCATCATCATTTATTTTTCATTAAATTTTCAACTTGTGTTTCTGCTTTTCAATATTGATATACAAGGATGGGATTGGCTTCTGTATTACAACAAACTCTCACCTTTTCCAATTATTTTACCGTCCGCTTTAAATCCAATCGTATCATTTTGCACCATCAATGCTTACCGTATCAAATTTGTTTCGAACATAAAATGTTTCGGTATGTGATAATTAGTTGACTGTTTGATTTTCATTTATTAAATTGTTTTTAATTTATGTTGATTATTTAGGAAAAAGCATCAAGCGATTGTTTCGCATGAAAATTGGTGATCAAAATG
>Hetgly06157.t1 gene=Hg157
ATGGGATTTGGCATTCTGTTAAATGTCATTTTGATTCATTTGATTGTTCGACACACTCCAAAGCTATTGCGCATTTACAGCAAAATTCTATTGCAAATATGTGTGACTGACATTTTATTATTAATGATGACACTCCTCTTCTGTCCGTATGCAGTTACGACGGAAAAAGGCGAAACGGAGTCAATTCTGTACGGATTGATCATCATAAAAGGGGTGGAAAATCGAATATGGAATGCGTTGGCATTATTTTGTTGGGTTTTTCTTCTTAATGTGTCCATGTTTGGCTATGTGTCACAATTTATTTTTCGCTATTTGATCCTTGTTCGTGGCAAAAAAATTTCGTCCCTTAAATATTTTTTGCTGCTTTTTCTGATACTTTTGTTCCCGTTTGCATATTGCGTTAATGTGTTCATTTGCTTTTTTCCACCTGCTGATCACGCAATATTGGACGACAAATCTGTCGCGGAAATTTTGGGCATAAATCTCGACGACCAAATTATTTTGGCTGCATATGCAATTAATGATATCCATTTGTCTTTAACTTTATTTTACCTTGTCATTATAAGCACTTTTGCTTATATCATAATATTTGGACTAGCATATTGTATCAAAAAATTCTTGGACATGAAAACCAAATGCGTTTCATCTTCTTCTGAAATAGCCAAAAAGATGATTGAAGTGAATAAACAAGTTTCTCGAAATCTCATTTTTCAGGCTTCTATGCCCATCATCATTTATTTTTCATTAAATTTTCAACTTGTGTTTCTGCTTTTCAATATTGATATACAAGGATGGGATTGGCTTCTGTATTACAACAAACTCTCACCTTTTCCAATTTTTTTACCGTCCGCTTTAAATCCAATCGTATCATTTTGCACCATCAATGCTTACCGTATCAAATTTGTTTCGAATATAAAATGTTTCGGTATGTGA
>Hetgly06158.t1 gene=Hg158
ATGGAAACACTTAAAAATTTTAAACTTGCTGATTTATCCAAAGCTTTGGCTCTACCAGACAACGATTTCGAAAAATGGCTCAAAGAACTTAAACTCCTACACACCACCCGTTTTTGCGACTGTGGCAATGAAATGAGCTACAAATGGAAGCAAGATCGACAACAACCTCTTTGGATATGCAATGCAGTGAAAAAACATGATAGCAAACGACCAACAATTGGATTTTACAAAGGCACTTTTTTTGAAGGAGCCCATTTGACGCCTAAACAAGTTTTTGAATTTTCCTACTATTGGGCACGAAAATTTTCAAACGATGAAATCATTTTTCAAATGGAATTGGGAAGTGCTACAGTGACCGATTGGAAAAACTTCATGCGCGATGTAACATCAGAATTTTACACAAGAAATCCAATCAAAATCGGCGCAGCAGGTGCGACGGTGGAATCTGATTTTTTGTGGCGTAAGCAATTTGGAGGACCGGATATTTTTTATAATTTGTGGACCCAAATCATGGAATTGTACCCAATAAGCACATAA
>Hetgly06158.t2 gene=Hg158
ATGGAAACACTTAAAAATTTTAAACTTGCTGATTTATCCAAAGCTTTGGCTCTACCAGACAACGATTTCGAAAAATGGCTCAAAGAACTTAAACTCCTACACACCACCCGTTTTTGCGACTGTGGCAATGAAATGAGCTACAAATGGAAGCAAGATCGACAACAACCTCTTTGGATATGCAATGCAGTGAAAAAACATGATAGCAAACGACCAACAATTGGATTTTACAAAGGCACTTTTTTTGAAGGAGCCCATTTGACGCCTAAACAAGTTTTTGAATTTTCCTACTATTGGGCACGAAAATTTTCAAACGATGAAATCATTTTTCAAATGGAATTGGGAAGTGCTACAGTGACCGATTGGAAAAACTTCATGCGCGATGTAACATCAGAATTTTACACAAGAAATCCAATCAAAATCGGCGCAGCAGGTGCGACGGTGGAAATTGATGAGACTGTCTTAAACAAACCAAAATACCACCGCGGCAAATTGCCAGGACCACAACAATGGTATTTTGGTGGAGTTGAGCGTGGCAGTGGACGGTGCTTCATCGTGCCAGTGGAAAGAAGAGATGCCGACACGTTGGTTCCACTCATTCAGCAGCACATTCACGCAGGCGCAACAATTGTGAGCGACGGATGGGCCGCCTACGGGAACATTGACAAATTACCGGAGCTGTACACGCATTACGTGGTGAACCACTCGGAGCACTTCAAGGATCCTGTCACTGGTCAGCATACAAACACAATTGAATCGACGTGGCAGAAGTTCAAGCAGCAACACAAAACGAGATTTGGCACGCAAAGATCACTTTTTTCCACATACATTTCTGATTTTTTGTGGCGTAAGCAATTTGGAGGACCGGATATTTTTTATAATTTGTGGACCCAAATCATGGAATTGTACCCAATAAGCACATAA
>Hetgly06159.t1 gene=Hetgly06159
AGGGAACATTCCAGGAAATTTAATTTTTTTTAACATGGCAAATCATGGGCCCAGCTATGGATTGAGCCGCGAATTGGAACGGAAGAACCAGGCCCGTTTTTGTCTTGAAGAAGCTCTCGAAGTACTTCAATGGATTGAGGATGTGACGGATATCCAAATGGATGAACCGCTAAGCCAAGTGAATACATCCGCACAAGTTTCGGATCTGCTCAAGGATGGCATCAAGCTGTGCATATTGATGAACCGCTTGATGGGGGGCTCCGCTGCTTGTACAACTGTCAAATTTCACAAGAACCCTCGAATGCCTTTCCACAAAATGGAAAATATTTCAAATTTTTTGGACGCTTGCAAGGCCTATGGCGTGCCAGAAATTTCATTGTTCCAAACAGTGGATTTGTATGAGAACAAACAGTGCTACAAAGTGATCGAATGTCTCCGATCATTGGCTGCTGTTGCCCAAAGCAAGTTCAAGTCGGGCTCCACGTGCTGCACCATCACCGACTTTCCCCCATGGGTGGTGAAAATGGCACAGAATCAGCCGCGCAAATTTTCGCCGGAAATCATTCGCCAAGGCGAGGCGGTCATCCCGCTACAGTACGGCACCAACAAATGCGCATCACAGAAGGGCATGACACCGTATGGGTTGACCAGGCAAATTCGAATGGACTGATTGAGAAAGAAGCGATTAGAAAGTGATCGAAGAGTGATCGATCAGAATCGATTGACACAATGATAAAGCTGGACAGATGGTTGAAATTGATAAATGCTAATGAAT
>Hetgly06160.t1 gene=Hetgly06160
ATGGCCGCCTTTGCTCTTGCGTCAATCCTCCTCCTGCAAATCCTTGTCTTCTGTACGGTTGTGCAACAGTTTTGTGATGCTGATGAACAACACAAAACGCTAGTTGATCATCATGAACCGAAATGTTATTGGCCCATGGTTAAAGGATGCGCGACATTAATGTGCAAAGATGAAGAGAATGGTGGCGAGAAGTTCCGCATTAACGGATGCACCACGGAAAAGGAAGACGGATATGGATGCCCAAAAGATTTTGATGGGATTTGCCCTGGCATTAAATGCAAAATATGCACTACAGGCCACAACTGCAACGCTGATAAAACAAATTTGGAACAACCTCCGGAAACCGAAACCAAGTTGGACATTCATATCCAGAGCGAGCCGTTCAGTGGTGCCCCCGCAATGATGTCTGGCATTGGCACCGGTGCTAAAATGATCGTTGCCATTGTCACCGCTGTTCTTCCGGTGGTGATTGTCCGTGCCGGTAGGAAAAAACTGATGCCGAAATTATAA
>Hetgly06161.t1 gene=Hg159
TATAAACTTGGATTGACTTCAGCACACTACATTCATTCCCAATTTTGAATAATCGTTTTTTTTTCTTCATTTTTTGTCAGCGTGTTGGTATTATAATCGCATACACGGGAAATAATGCAATTTTGCTTGTTCATGAGCACATTTGTTGTTCTGCTCAGCGTTGTGTGTGTTGTGTCCGCTTTCTTCGGCGGCGGTTTCGGCTTTGGCGGCGACGGTTGCTGCTGTGGCGATTGTTGTTGTGACTGTTGTTGCGGCTGTTCTACTCCGGTATTGTTGGCACTCCCGTGCAGCTGCTGTGACAGTTTTGGCCTTTACGGTGGTTCAATTTTTGGCGGCCGCCGCCGCCGGAAGCGCCAAGAAATTGAGGTGAAGCGCGAGGAATTGTACGCGGACAAAGGGCCAAAAAGTGCGGACTTCCTCAACAATCACAAATGTGCCGACCCAATTTGGCTGACATTATTGGCACGCAAATGGGCCAAAGAAAGTGAGGAAAAAGTGGCCGAAAATGAGCAGCAAAATGTGACCAAGCCAATTGCTAATTCGCCACCACATTCAAGTAAAATTATAAGAGAAGGGCCAAATACGAGAAGAATGAAGCGGCAATTGATGGCGAACCACCGGAAATTGGCATAATTTGTTGAAAAAATTAAAACTTTGACAAAAGTTTGTATAAGTGAAACCATTTTTTTTTTTTGAATAAATTTGGCATTATG
>Hetgly06162.t1 gene=Hg160
TGTGGCTTCAGTTGAACAAATTTAAAAATGATTGCATCTAATTTAAAAATATCCAGAAACAAAATTAAGCCAATCAAATGAAATTGTTTTGGAATTTTTCGTTCCCAATTTTGTCGTCTACAAACATTCACCATAATTATTGATCAACAGTAACAACACACACAAAAAAATACAGTAGTCCATCCATTCATAATGGACGATGATTACGACAATTATGTGCCCCAAATTTCGACCATGGACTACAGTCTGTTGCAGCCGGGCGGAAGCGGCGGCGGCGGTGCCACGGGCGGTGGTGGCACTGCCGGCATGGGTGGTAGCGGTGGACAGCCGCAACAGCAACATTTTTTGTACGATGCCGGGGGCGGGGGTTGCGGCACAGTGATGCCACCCGGCGCGGTGGCAGCATCGGGCGGCAGAGCGGGCCTCCCTCCCGGCAGCGGCGGCGGGCACCCACAATTTGGGGGGCACTTCGGTGCCGCCGAGTTTGGCGGTGCTATGCCAGGACAGGCTTACCCGCCTGGCTATTGTGTGCCGCCCTCAATGGCACCACCGCCCCATATGCAACAAATGATGGCACACCGCCAGCAGCAGCAACAGCAGTTAATGGGTGGCGGTCAGCCGCAGTTTGACCCGCGCTACGGTGGTGGGAGTGCAGCGGTTGTGCCAAAAATGTCCGCCGCTGCGGCACAAATGATGGCACAGCATCAACAATCAACGGCGGCTTCTGGCACAAAAGCGGGGAAAAGCGGTGGCAGCAAAAAGGGTGGCAAAAAAGCGTCTGCCGCCGCCGCTGCAGCGGCGGCAGCCGCAGCGGCAGAAGCAGCAGGAGGTGGTGCCGTAACAGTGATGGACCATGGAGCTGGACTGATCAGTGGTGTGCCGCCACAACAGCAGGTGCTGTCGCCGGCACAATACCAACAGATGGGCTATTATTACAAAGGGCCTGGCCCGCCGCCGGGGATGATGCCGCTGGGCCATGCCGAAATGATGTCCGCTTCTGCTCACAGCAGGGAAGAGCAACAACAACAACAAAAGCAGCAACATTTTCAACAGGCACAGCAACAGCAGCAAATGTTCCAGCATCAACACTATTTGTTGCAACAACAACAACAACAACAACCGCCGCCCCAGGGCATGTTGTACCCGTCACAGCAACAGGGCACAACCGTTGCTGCTGCCGGAGCGCAGCAGCAGTCGAATTTTGGTGCCGGGTACGGTATGCAGCAACAACAACAGCAACAGGCAAAGCAGGCGGCAAGCGCAGCGAAGGCAGCCGCTGCGGCACAACAAATGATCAAAAGCGGCGGAGGATCCGCGACGGCGCCGGGTGCCGGAGGCGGTGGCCAATCTGCAGCGGCGGCACAACCGTACAACCAGCAACAACAACAGCCAATGTTCTACAACACGGGCCAGCAACCGCAGCCATACCAAGCCCAACAACCGCAACAACAACAACAACAGCAGCAGGCTGCTGCTGCTGGACAATATCCGATGATGGGCATGCCTTCCCAACCATCTGCTGCTGGCTATCCCCAAATGCAATATCCAACGTCCGCTGATTACACCCAACAGATGGCCATGCAACGGCAGGCATACTACTTGCAACAGCAGCAACAAATGCTGGCCGCTGCTGCTGCCGCCGGTGGTGGTGGCGGTGGCACCGCTGTGCCGTCCTCCGCCGCTGCCGCTGCGCACATTGCCGGAGGCGCCGGTGCCGGAGGCGCACCGACGACGGCATTTTACCATCAAAGTTACATGAATCCTCAGCAACACCACCAGCAACAACAGTACATGATGCAACAGCAGCAGCAACAATTTTACCGTGAACTTTACGAGTGTGACCAGCAACTGAATGCGTTGTTGCCCCAGGCCCAACAAAACGCGGAGGCGGCAATGCGCGTGGAAAAATTGCAGATGCACCGCAGCTACTTGCAAGGGCACCTCATTCAGCTGCAGCAACAAGCCGCTGCGGTTGCTGCGTCGATGGCATCATCGTCCAACATTGTGCCACCATCATTGTCCACCGCTGGCATGGTTCCAATGCAGCAACAACAGCCAACCGCAACATCCGCTGGTGCTGACATCATTGCATCACCGTCCAACGCGTCCAGCCGTGAACAACCGCCGCAACAACAGTTTATGGGCGCGCAACCGACCGCTGCTGGCACACAATACGCTGCTCCATCTTCGGCATATGGCATCGCTGCGCAACCGCCGCAACACCAACAACCGCAGCATGGACACTTTCCTGGTGCCACTGGACAACAGCAACAACAACCTGTTGCTGCCGGTCAAATTCCTGTGCAACAAAAGTTGCAACCGTCAAGCAACCAACAACCAGCCTCGGCACCGCAACATCAATTCGGCGGTTGCACATCGTCCGCACCATCGTCGTACATGCCACCAACTCCGCAGACGGTGGTAGGGGCAGCTGCAGGGTACAGCTCGCCGGCGGCGGGTGGCGGCGGCGGCACGCCGCAACAGCAACATCAACAACCGACATCGGTTGGCATGGTTGTGCCACAACAACAGCAACAACCCCAGGGCATTACTGCTTCCCACCAGCAGCAACAACAACAAGCGCCGCAGCCGCAGTTCACGCAACAGCATTTGGCACCACCGTCTGTTGCAGTGATGTCCGCATCCAGCCAAGTGCAGGTTAATATCCGTCCTGAAATGCCGGGCCGAACGCTGATCAGCGTGTACCACAGCCAGGACATGGCACCGCCAACAGTTGTGAGCAGTTCAGCAGCGCCGGTGGCATCATTAAACCAGCAACAACCGCAACAACACGCCGCAACATATTCATTGTCATCGACGGCAGATGCTTCCTCTGCAGCTGCTTCAGCAATTATGGCACAAAATTTGGCAATGGCTGCTGCTGCGGCGGCGGCTAAGGACTCCATTCCACCGGAGCCCGTGCCGTCCAACATTGTGCAGGAGCAGAAGCGGCGCCAGCAACAGATGCTGTTGTTGCAGCAACGGGAAGAGGAGGACCAGCAACAGCAGCAGCAACAACAACTTGAGCAACAGCAACTGCAGAAATTCAAACAGTACCAGCAGCAACAACAACAACAACAACAACAACAGAAGCAGCAATCTTTCAATTTGGGTGCATCAACGATGCCAACAAAGACTTCGTCACTTTCCACATCACCGCCACCCAATGCGCCAATTTCACCTGCAACCAAAGCACGTGACGATGAAGCAGTTCAGCAGGATGCAGCACAACATCGCTTCCGGAGTGCCAGTTCTGCCCAAATGGCACCGTCGGCGGCGCCATTTCGGCACCGTTCTCATACGTCTGTAATGGTGCCGCAACCGGAAATTGCTGTTGAACAGCTCCAGCAGCAACGACAACATTCCCAGCAAAAGTCGCCATCACCATACTGGTCTTCGTCGTCACAACATCAGCGCGCAACCACACCGCCTGAATTTACCATGCCGTCGTCACATGGACATGCTCGTCATCGCCAGCAGCAATCTTATGCCGGTGGTGGTGGGTCCACCATGTTTGGCAACAGCAGCAAAGTGCCAACACCTCCGTCACCTGCGGTTGTTGTACGTGCTCCACCACCACCACCACCTGCAGCGGTCGTCGTACAAAATGCCAAAGTGGCGCTTTATTTTGTTGCAAAGCATGCTGCATCGTCATTCGCTTCGTGTGCCACCGTACGACGAATTGTTGCACGTGAATCGGTGGCTGGAACGGTCAAAATTGTGCCAAGAAAGCCGCCGCCGGAAGTGAAAAAGGATGCAGCAAAAGGTAGTGACAATGCCAAACGCACTACTGCTGAAAGCCATGCCGTCAATTTTGCCACCACCGATGCCGCCATAGTTGGCACGACGGCTAAAGCAGCTACCGCTTCACCCCCTCCGGCCTCCCCACTCCCACTCCAACAGCGAGAAGATGCCATTGAAGAAGCAGTTGCTTCATCACCAGTAGTTGCAGCCAAGCAAATTTCAACAATGGCACAAGACGACGACACCATGACACCGTTGTGCCATCCTGAAAATGTGTCATCACAATTGTCCGAAATGGATGATTATAATGATGATGATGCCATGGACATGGACGATGATGATGAAGGCCGCAAACACGATGATGATGATGATGATGATGATGTTGAAATGAGTGGTGATGGGGCGAGAAGCATGGAAAAACAACAGATGTCGGCGGATGAGGAGGATAAAGCGGTTCAAGCAGTACAACTGGAAGAACAGCAGGAGGCTCAACCTGTTGTTGCTGACAATGAGTCAGCTGAATCGGCGGCGGCACTGACCCCGTCTGCGTCGGAAACATGCCTAAATCGGCTAGATGACAAGGATGAGTCGGCGGTGGACAGTTCGCCATGGCCCGAAGTGTCCACAAAAGAGACAACGCCAATGGACGCCGATGAGCAGCAGCAACAACAACAACCGCAACACAAACTCCCATTTTCCGTCAAACATTCGTCATGCTCATTTTCAACCGCTGCGGAACTGAATTATGAATTCGCCGCCTCCGGCACTTCGTCCTCAAAAGGCAAACAGCATCAGCAGAGAGCCGGCACCAAAAAGCGCAAGTTGGACTGGAACCGGCGGGACGAGGACGAGGACTATGTGAGCAGGGCAAAGTTGTCACGGCATACAGTGCCAGTGCCGTCGTCATCGTCTTACTCGAAAAGGAAGCAAAAGCGTAGCGGAGGAGGCGGAGGCCGAAAGGCAACGGCACCACTTGCGGCAGCAGAAACAGCGGGCATGGTGGACGAAGCGGACGACGATGACGAGGAGGGCATGGCAGCGGCAATGGTGGCGGCCGAAGCCGAACAAATGTTGCTGGTGGAGAAGCGGCGATCAACCAGGAAGGTCACTGGCGCCAAAAAGGCAAAATATGAGGGTGACAGTGAAGATGAAGCGGCCGCGGCTTCTTCATCAAAAATGGCAACAGCAATCGCGACACAAATGCAGCAACACCAGCAACCGCCGCAACTTGCGGCATTTGAGGAAAAAATTGTGGAAAAAATTTTGGGAGTGCGCTTTGGGAAGCGAAAAATTGTGACGAAGAAGAAGAAATTGGAAAGGAAGGAAGAGAAGGAGGAGAAGAAGGAAGAAGAAAGCCAGAAAGATGGCGAAAAGAAGGAAGAAAAGAGTAGTGGCAAAGATGAAGAGGAAAAGAAGGAGAAAGAGGAAAAGGAAGAGGACGGAAAGGATGAAAAGGAAGAGAAAGAGGAAAAAGAAAAGCAGGAGGAAGAGAAGGAAATGAAGGAAGAAGGAACTGCTGATGAGGAAGAGGAAAAGAAAGAAATGGAGGGAGGAAAGGGAAAAGGAGAAGAAGAAGAGGAGGAACAGGAAGAGGAGCAAGTGGAAGAAGAAGAAGTTCAGGTTGAGGAACTGTACGCCAAATACAAAAACTATTCCTATTTGCATTGCGAGTGGAAAACGGTGGAGGAGTTGGAGCAGTTGGGCGACAAACGGGCACTTACCAAGCTGAATCGATACAAACAAAAGTTTGGCGAAACGACCACTGTTGCGGGCGAAGATGATGAACAGGAATATTTCAATGAAGATTACACTGTTGTTGCACGCATTTTGGACGAAACTTACGATGACCAGGAGCAGCAGCATTACGTATTTGTCAAGTGGAGGGGCCTGTCCTATGACGAGTGCACTTGGGAACTGTTGCAAAATGTGCCGGAACTAAAGGTTGAAGAGTTTCGACGGCGCTTAAAGTTTGACCCATGCAAGGCACGTGAACAAGCGGATGTTCGCCTGAGTGCCGCTGAATTTGGACAGTTGGCAGTGCCCAAGGACAAAGTGTACAAGAATGACAACATGTTGCGCGAGTACCAGCATGAGGGCGTCAATTGGCTGCTGTGGACATGGACAAATGGACGCAATTGCATTTTGGCGGACGAAATGGGCCTTGGTAAAACTGTGCAAAGCATCGCCTTTTTCCAGTCCCTTTACGACATTGGCATCCATGGTCCCTTCCTTGTTGTGGTGCCATTGTCAACATTGTCCAATTGGGAACGTGAATTTGAGAATTGGACCGACATCAATGTGATTGTTTACCATGGTGGCGCACCGAGTCGGCACATCATACAACACTACGAATTCTATTATAAAAAGTCGGACCGTCGTCGGGTCACCAAATTTGATGCAATGATCACCACCTATGAAGTGGTTGTGCAAGAGGTGGAAGTGCTGCGCAAGATCAATTTCCGTGTTTGTGTCATTGACGAAGCGCATCGGATCAAGAACCGCAACTGCAAATTGCTTCAAACCGGACTGCTCTCATTGAAAATGGACTACCGCGTGCTTCTCACCGGCACACCGTTACAGAACAACATCCAAGAGCTGTTCTCGTTGCTCAACTTTTTGGAGCCTGAACAGTTCGCCAATTCCGAGGCTTTTCTCCACCAATTTGGCCAATGCCAAACGGAGGAGCAAGTGCAAAAGTTGCAGGAGATACTCAAACCGATGATGCTCCGACGGTTGAAGGAGGACGTGGAGAAGGAACTGCAGCCCAAGGAGGAAACAATCATTGAGGTCCAACTCTCCAACATCCAGAAAAAATATTACCGCGCAGTTTTGGAGCGCAATTTCACCCATCTGATGAAGGGCTCAACCCCGTCACTGATCAGCCTGAACAACACGATGATGCAACTGCGTAAATGCTGCAATCATCCTTATTTGATCAACGGCGCCGAAGAGCAAATCATTACGGAGCTAAAGCAAATGCATCCGGACAAGACGGAGGAGGACATCCAAGTGATGGCATTGATTTCGTCCTCCGGCAAATTGGTGCTCATCGACAAACTGTTGCCAAAACTGCACGCGGACGGGCACAAAGTGCTCATTTTTTCACAGATGGTCCGTGTGCTTGATCTGCTCGAGGAATACCTGTCCATCAAAGGCTATCCATTCGAACGCATTGACGGCAATATACGCGGCAATGATCGCCAAGCAGCAATTGACCGCTTTTCGAGGCCACAAAGCTATGATCGTTTTGTGTTTTTGTTGTGCACCCGAGCGGGCGGTTTGGGCATAAATTTGACATCTGCGGACACCGTTGTGCTGTTTGACAGTGATTGGAACCCGCAAAATGATTTGCAAGCGCAGGCGCGTTGCCACCGCATTGGGCAGACAAAACCCGTGAAAATCTATCGGCTGATCACCGCCAACAGTTACGAGCGCGAGATGTTCGACAAGGCCAGCCTGAAGTTGGGCCTGGACAAGGCCGTCCTCCAATCCATGTTGCACAACAACAAGGGCGAAAGCACACAGCAAATGTCACGCCAAGAGGTGGAAGATTTACTGCGCAAGGGCGCCTACGGTGCCATCATGGACGACAACGAGGGCACCAAGTTCAGCGAAGAGGACATTGACACCATTTTGTTGCGCCGTACACAAACCATTCGGCTGGAGCCGGGCGTGAAGGGCTCAACATTTGCCAAGGCGTCTTTCACATCGTCACACAATCGGGAGGACATAAACATTCAGGACCCCGATTTTTGGTCAAAATGGGCGAAGAAGGCGAACATTGACGTGAACTCGTTGAACGATGAGTTCTCCACCAAACATTTGATTGTGCATGAGCCGCGGGCGCGTAAGAAGCGATTTGAAGCGGACAATTTCAAAGGGAATTCCGAAAGTGGTGACGACGGAGGTTCGGATGAAGCTGATGACCGATCGCAAAGCACGCCCGGGCCCGGCACATCCAAAATTGCGGAAGGCGTCAAAAACCGAAGTTCAAAACGTAGTCGACGACGTGTCGGCGGTGGGCCCCATGGCGGTGCCGGTGAAGACGATGAGGACTACCCATACAAGCCGGACGAACTTGCCTTCAACAAAACGTCATACTTTAAAGTTGAAAAGCTGTTGGCACAATTTGGTTGGGGCCGTTGGGCTGTGCTGAAAGCATTTTCTGATTTGACTGAACATGAACTGGAACACATCACCAGGACACTGTTGTTGCATTGTGTTCGCGAATTTCGTGGCGATGAGAAGATCCGTGAATACGTGTGGGCACTGATCACTCCGTCGCATCGCACACAAAAAAAATCGGCAACAACAAAAATTGATCCGGATCAAAAGCAGCAGCAGGATGAAAAAAAGACAGCAGCGGCAACTGGGGACTCAAACAGCCGCTACCACCAGGGATGGGCCGCTTTGCCTGAATACAATCCGCCTTTTATCTGCGTGGACGCGTCCTTCCAACGGCATTTGCATCGGCACTCCAACAAAATATTGAACAGAATCCAACAATTACATTTCCTGCACACAATTATTGTCACGTCGACGCCGACTTCGGCGACGCCAACTGAGTCCAAGGAGGCTGGCGCTGAACTGTCACATGAAGATGACAAAAAAGAGTCAGCAAAAGTTGCTGCCAGCAGTAGCAGTGGCTACGAGTTGAAAGTGGAATTGCCCGACGCGTTGGATAAATGGCAAATTATGCCGAATTGGGACAGGGATTGTGATCGCGATCTGTTGATCGGTGTACACAAACATGGAATGGAAAATTGGGAGCAATTGCGCGCGGATGAAAAGCTTTGTTTTACCCAAAAAAGCATCCAATTTCCGAACACGATGGACCTGAACAATCGCTTTAAACACCTAATTAATGTGCTGCAAAGAGTTGCCGTCGAGTCATCAGCAAAAGCAACGGCAAAAGCCCCACCGCCCGAAACACCACCATCAGTGGTTGAGTGGTCCAAGGTGGAGGAGAGTGACTTTATGCGAATATTGCGCAACTATGGCGTCAAGGATGACACGAACAGTCAAAATGTGATTAATTGGGGCCGCTTTCGTGAACTTTCCATCTGCTTGCACAAAAAAACAGACAGAGATTTGCTTGAAATGCTTTACTGTGTGTTGGCCATGTGCACCTGTGTACAGTCTGGTCGTGAGGGCCTTTCCACGTTGGATGAAGGCCGAGCGGAGCGCGTGGACCCGATCAGTGCTAAGGCGGCGGAGAAGCTGATGAATCGGCTCCATCTGATGCGCAAAGTTCATGCCATCATCACAATGGGTATCCAAAACATTCGCGGAATGCTCAAAATGGTCGCGCTCGACGTTATGCCAAAAGGATGGACTGAAGCGCATGACGAACACTTGCTCATTGTTGTCGACAAATTTGGCCTTGAGGACATTCATGGAAAAGTCAAACTGTTGCCCAAACTTTTTGAATCGGTTGGTCCAATTGATGAGCACATTCTGTTGCGGCGAGTGGTCGAGATTTGTATCACGCTGGAGACCGCCAAATGGAGTGGGCCCGCGTCCATTGAAATGTTGCTGGAGGATGGCGCCGGACAAGCGCAACGCGTCCAACAACAGCAACAACACCAAGTACCAAGCACCAGTGGAGGAGTTGTGCCAACTGTTCAACAACAACAGCAGCAGCAACAGTCGGCTGGCAACAAGGCCACCAAAAACATGGCGACAGCCAGTAGCAGCAGCAGCAAGAGTGCCGCCGCCTCAACGGCGGGGGGCAACGGGCGCAAAAAGGTCGATCAGCCAGCGACGACAGCTCGAAAAGGAAGTGTTCATCAACAACAACAACAAAATGCAGACAAATCAACAAAGACAATTTCAACCACCGGCACAAGTGCCACAAGCAATAACAGTGGCGGGGGCAACAAAATGCCATCCATGGCCTATAATGAGCAACAAGCATTGCTCAAAATGATGGAACAGATGAGCAACCCGAACTACTTGCTCTCGTTGATGAGTATGATGAGTCCACCAACAGCTGGCGGCAGCACAAGCAGTAGCAGCAACAGCTCAACCGCGGCACTCCAGCAACAGTTCCAGCAGCTGCAAGCGCTGCTCAGCCTGTCCGCGCTGGGCGCCGGTGGCGGCGGCGGCGCTGCCGGTGCCATGGTTGACCCAACACTGGCCAGCCTGAGCGCGTCGCTTGCCGCCGCGTTCGCCGGTGGTAGTGCCAGTGGCACCACCCCTTCCGCAAGTGTTGCCGCTGCACCACCATCGCTGTCCGCTTCCAAAACTGGAACCACTACAACAACTGGCAGCGGAAGCAGCAGCACGTCCGTGATAACGACGGCTGCNNNNNNNNNNNNNNNNNNNNNNNNNNNNNNNNNNNNNNNNNNNNNNNNNNNNNNNNNNNNNNNNNNNNNNNNNNNNNNNNNNNNNNNNNNNNNNNNNNNNNNNNNNNNNNNNNNNNNNNNNNNNNNNNNNNNNNNNNNNNNNNNNNNNNNNNNNNNNNNNNNNNNNNNNNNNNNNNNNNNNNNNNNNNNNNNNNNNNNNNNNNNNNNNNNNNNNNNNNNNNNNNNNNNNNNNNNNNNNNNNNNNNNNNNNNNNNNNNNNNNNNNNNNNNNNNNNNNNNNNNNNNNNNNNNNNNNNNNNNNNNNNNNNNNNNNNNNNNNNNNNNNNNNNNNNNNNNNNNNNNNNNNNNNNNNNNNNNNNNNNNNNNNNNNNNNNNNNNNNNNNNNNNNNNNNNNNNNNNNNNNNNNNNNNNNNNNNNNNNNNNNNNNNNNNNNNNNNNNNNNNNNNNNNNNNNNNNNNNNNNNNNNNNNNNNNNNNNNNNNNNNNNNNNNNNNNNNNNNNNNNNNNNNNNNNNNNNNNNNNNNNNNNNNNNNNNNNNNNNNNNNNNNNNNNNNNNNNNNNNNNNNNNNNNNNNNNNNNNNNNNNNNNNNNNNNNNNNNNNNNNNNNNNNNNNNNNNNNNNNNNNNNNNNNNNNNNNNNNNNNNNNNNNNNNNNNNNNNNNNNNNNNNNNNNNNNNNNNNNNNNNNNNNNNNNNNNNNNNNNNNNNNNNNNNNNNNNNNNNNNNNNNNNNNNNNNNNNNNNNNNNNNNNNNNNNNNNNNNNNNNNNNNNNNNNNNNNNNNNNNNNNNNNNNNNNNNNNNNNNNNNNNNNNNNNNNNNNNNNNNNNNNNNNNNNNNNNNNNNNNNNNNNNNNNNNNNNNNNNNNNNNNNNNNNNNNNNNNNNNNNNNNNNNNNNNNNNNNNNNNNNNNNNNNNNNNNNNNNNNNNNNNNNNNNNNNNNNNNNNNNNNNNNNNNNNNNNNNNNNNNNNNNNNNNNNNNNNNNNNNNNNNNNNNNNNNNNNNNNNNNNNNNNNNNNNNNNNNNNNNNNNNNNNNNNNNNNNNNNNNNNNNNNNNNNNNNNNNNNNNNNNNNNNNNNNNNNNNNNNNN
>Hetgly06163.t1 gene=Hg161
AGCCCGTCCTTGGGAAGAACCCGTCGTTCGTCGCGCAATTGGAACGTGCACTCGCATGCGGCTTCTGCCCTCGCTCGGACCAACAATGGCCTCGAAGCAACCCATCTTCATTTCTCTAAGGGTCTTTGTCATCACCCAGCCCTTTCCGATTTCATTTCTGAAGTCAGCGGAAGCATCGACAGACAAGTTGACGCAGCGAGGTCAGCAAGGAACTTCATACACAAACGACACAAACGCTACGTGCTGCAGG
>Hetgly06164.t1 gene=Hg162
CAGGCCGAAAAACGACGACAACAAATACTCGAGCGCGTGAGAGACAAACCCCGAGTCAAGCCGACACGGCTTTTGGCGGAGATGAGGCGTTCAGCCGCCGATGAAACTTATGTGGCTATGGGATCTGACAATGCGCTCAGCTGCATGATGCGACGGCAGAAGAAAAAAATTTTGGGCAACGTCGACTGTGCAGACCCATTGGCATTCACAATTCCGGACAAATTGCGGCTGAAGGATGGCGAGGACATAGTGCTCTACGACAGTCGCACGGTCAGAATTGGAGAAAAGGACGTTGTGCTTGTTTTTGGGAGCGAACGGACTTTGGACATTTTGAGCAAAAACAGTGCAACTTGGCATTTGGACGGGACATTCAAGGCAGCACCAAACATGTGGGAGCAGTGCTTTGTTGTGGGCGCGTCTGTCAACCACCGAATGTGCATTGGAGTCTGGGGTCTTCTGCCCGGGAAACATCGACGCTACTACGAGGAAGTGCTGAACTTTCTACGTAACCGAATTTCACCGGTCGCACCGAGAAAAGTCATTTGCGATTTTGAGAAAGCCGAAATGAACGC
>Hetgly06165.t1 gene=Hg163
AGTAAATTTTTGTTTCATAGAATAATAAACCAATTAATCGTTGTCAAAAAATCGTCAAATTGCCCTATAATTCTTGAAATGTCAACGCCTTACATAGGCAGTAAAATCAGTTTGATTTCACGTCTCGACATTCGCTATGAAGGCACACTTTATCAAGTTGACCCATTGGAATCGACAATTTCATTATCACAAGTTCGTTCATTTGGCACAGAGGACAGACCCGCGCCTGTGCCCGTGCCGGCACGCGCTGAAGTGTATGATTTCATCATCTTCAAGGCCAGCGACATCAAGGATTTGATCGTTTGTGAAGAGACACCACCGAAAGAGCCAAGTGTTGTTGACATCACTTATGATCCTGCAATTGTCTCAGTGTCAAAGCCGCCGGTCGCCGCAGATGCGTCTGCACCACAGCAACCTGTTCAACAACCATCTGTTGCTGAACAGTTGCAACGAATTGCTGACGATAAAACGTCCCAAAAATCTGCTACATCTCCCCAACCGGCGCCGCAGCAACAAAAGAAGCAGCCGCCTCCGCTCGTCGCACCGCCCCCGTACATTCCGCCGCCCATTGTGCCGTCCTCCGTCAAGCAGCCACCGCCTGTTGCCGGTGGTGTTGCACACAACAGCCAACAACAACAACCGTCCTACCGGACAGCAGTGACCGGAGGGGGAGGTGCAGTGACTGCGCAACATTTGGAGTCCAATTTGGGTGCGGCGTTTGGCCAGCGACCACAGCGCTCATTTTTCAACCGTTCCATTGTGGGTGGGGCTGAGGCAAAACAGTCGCCACAACAGCAGCAGCAGCAACAACAACCACGGGGCCAAGGGTTTTTCGATTCATTTTCCAACTCCAATTACAACCAGCAACAACAACAGCAGCAGCAGCAAAATCGGCGTCCATATTTTCAGCAACGCCAACCATTGCAGCAACAACAGCCCCCATTTCATTACCAAGGCAGTAATGTTCGTCGTGGCGGTGCCGGTGGAGGTGGGCCGTACCCGCAACAACAACAGTCGGGCATCGGTCGTCAACCGTACCAATACCATCACAGCCAACAATTTCGAGCAGGACAGCAACAACAACAACCGCAGCAATTCTACCAGCCACGCTTTGATGGCGACTTTGACTTTGAGAAGGCCAACCAACAGTTCCAAACCATTGGCGACCTTGGTGACAAAATTGCGGAGCTGGGCCTGAATGAAATTGAGAAATTGCCATCTGTGCGCGGGAGTGCCCGTGGCTCCGAAGAACGAAGCATTTCGAGCGGGAGCACTGCAAGCGACAAAAACATTGGCATTGTCATCAGTGCCAACAAAAGCCCTCCCGTCGTGGCGGTGGTGGCGGAGAATTTTTATGACAAAAATTCGTCATTTTTTGACAACATTTCATGTGATGCGCTTGAGCGCGAAGAAGGGAAGAATAATCGAGTCGACTGGAAAAAAGAGCGAATTACGAACCAGGAAACATTTGGCCAAATGGCTGTCCGCACAATGATGCATCATCACAATCACCATCACTATCAACGGGGTGGTGGTGGACGAGGTGGCGGTGGTGCTGGTGGTCCATGGGCATTCCCCGCGTCATATCGCGGCGGTGGCGTTGGCTACAACAATTATCACCTTCACAACCAACAGCAACATTATTACTACCAACAACCGCAACACCGAAACCACTACCACAGCAACAACCGTTTCGGCACGCAACGCCATTACCAAGCGGCGGCGACGGGCGCGCCACCGGCACAACACCAACAACAAATGCAGCAATAGTGTAGTGGCAAAAAAAGTGCCAAACAAAAGATGAAGGGGCGCGTGGAGAGGATGGGGACTGAATTTGTTGAAAAATGAGGAAACTGAACGGCAACGAATGGGCAGATAGATGACAGATTTTGGCATTTTATTTGTTTTATATGGAATTTGTGATGAGTGACAAGCAACTGAAAAGGGGAGGGGGTCAAAAAAGCGAAATTTTTCTTGCATACAAATTTTCCAAAAATCCACAAAATTTGGTATAACTCTTTAAAAATGATAAAAATTTCGAACTTTTCTGGCGGCGCCTATCGCCACTGCTGCCACTATATCATTTTTTTAAATTATACAATTTTTTTATTATTTTAGAGATTTATTGGAACTTTTTTTAGTAAATTCAGAAAATGTTCGTTCTCTCACATATTCCATATATGCTTTGCTTTTTTGCAAATTTAGGAGATGCGTTTAATTTTAAAATTCTTAAGACATTTAAGCGGTAAGATACACTCAAAAAAATTTTTTTTTCTCTAGATTATGTCCTATTTTTTTTAATGAGTGTGTGGCATTATTTACTCAAAATATTCAACTACCATTATTGACTTCATTTTTTTCATTCGAATTTTGTATGTGAACCCTTTCTAATAGTTCATTATTATTATTCATTATCTAACACCCAAATTGTCCCAACCATTTTGGCCTCATTTTGTTTCTTAAATGGAAGGCATTTGCCAAATTATACTGATTGAAATTTCCTACGATTATTTTTTTTAATTGATTGATTGATTGTATCGCTTTCGAAAAATTATCTTAATTGATCACAACAACAACTTTTGTTAAATTGATTTAAATATGGAGATGGATGAAAACATAAAGTTTGGTTTTGTT
>Hetgly06166.t1 gene=Hg164
GCGGTATCTAAATCATCCGCTTTTTCATAATTAATAATTAAAAAAAATCTGTGATACATTCGCTAATTTATTTAGCATTAATATGATGAGACACAAATTTAATTGGCATCAAATTTGCTTATTTTTATGCCATTTTTGGCCCATTTCATCGCTTTCGTCTGACAATGAGCAATTCACTGAAACTTTGCTGATTAATCCACTTCCGAATGGCGACCTTTTCACGCTGTTCAATTTCACTGTTTTTGCACACCAAGAACATGAAAATTCAGGTTTTAATGCCTCTGGGCATCGGCCTATTCTTGTCCCAAGTCTTCTCCAACATTTGGCCAACCAATTTGGCATCACGGATTTGCATCTGTCCATTGCGCAAGGCTTTTGGCGGCCACGAATTTGGGGCGCACAAATGCCGTGCACAGAAGTGCCCAGTGGCAACGAATTAATTGCCAAATTTGACACATGCCAAGTGGCTAATTGCAGTCAGTCCGAAACTCACGAGCATGATGAACGCAAATTGGCACGACTTGTGCACACTTTGAATGGCCTTTTTTGCACTTCCATGCTCCATTTGGTCCCACAGCATAGCAGCAAGCCAAAATTGGTGTTTCAAAACGGAGCTTCTGCCGCCAGTGACGAAGAAAGCTGGTTTTGGGGTACCCTTGGGGGCGAATCGGTGTGCACGGAAAACATCAAAGCATGGAAAAATTTATTGCCCTGCAAACAGAGCGGTCTCGTCAGTTTGATGGATCCAATTGAATTGTTGTCCGCCAAATTTCACGCAATTTCATTAAAATTGACACAAATTGGACCAGTTTGGCATTTTTCAATGCTTTTCCGTACCGTTCACAGCGGAGAAATGAGCCGGGAAAAGGCCACAAAAGGCATTTCCCTGATTAAAAGTTTGTTTGGACGCGAATTGACAACTGAATGTCCAATTGTGAGCAAAAGTTCGGTTGTCATTGTCCAGAATGAATTGTTTGGCCTCAAAATGCCAGCGAAGAATTCGTCCAAAATTGACAATCAAAATTTTTTGGAATTTAATGGTGCGAAGCAAATCAACAAAATTGGCATTTTTCATCTCAAACCACCAAATTTTCATGCCCTACAAATTCACACGGAAAATATTATCGTCCATTCCCACATCAAAAGTGTCAACCAAATTGGTGGTCGGATCAGCACACAAATTGTGAATCCGTTGTCAGTTCCGCTGGTCAATGCTTTGTTCGCCCACCAAATTTCATGGCATTTGCGCATTTTTTTGCACACTTTGGAAATGAAATGCCAAACTGAAAATGGCATTGAAAAGCCCAATTTTGAACTGTCCTCCTTCACTTTGGCACGTGATCGGGCACGCCCTTTGCTGATGGAGTTGACCATTGGCATCCCGGCCATGTCCAAATGTGTTGTGAATGTTGATTATGAAGCCGCTTTTCTTAGAATTGCCGACTTTCCGCCGGATGCCAGCAGTGGCATTTTTGTCCCTGGTGCTCTTCTACAAATCCCACTTGCGCACAATCCAGCCCTGATGCAAACAATGCACGAAACATTTCCCATTCCATTGGACATTGGCAAAACCCAATGGGTCCGTGTGTTTGGTGAACCATTGCTTGTCCTTTTGCCAATCCCCGACTTCAGCATGCCATTCAATGTGATCTGTTTGGTGTGCACAGCGATTGCCATTTTCTACGGCAATGCATTTGCATTGAGCACAAAAATAATGGTCCCTGTGCCTAAAAAGGACACGGCAGAAGCCGGGAACGGCATTTGTCGACAAGGCATTCTTGCCCAATTACTGTGCCAATTTACAGCAAAAATTGGCACAATTCGCCGAATTTTTCAGCGAATGCCAAAGGACGAAAAAAAGGAATGAAGAATTTTTTTTTTTGTATAACTTTTTTGACAGTTTCTTTTAAACTTTTCATCTTTTCACAACTCGAAAGCTTTTTATGTACATTTTATTTGGATTCTCCCAATTTATTATTTATTTGTAAATATTTTCATTTTTTACAAATTTTA
>Hetgly06167.t1 gene=Hg166
ATGTCTGACCAGAAACAATTGTTTTTATTCGGCCAAGCTCTGCCGGGCAATGAGAGTGGACTTCTTGAAAGGATGAAGGAATGTGCGGACAAACGGAACAAAAGTGAGCAGCAAGTGACCGCTGCACTTCAGCAAATCCCAGCGGACCAAATCAAACAAATTGCAGTCGGCTCAACACACGTTGCCTTTCTGTTCACGGATAACACCATTGGACGTCTGGCATTCGAACTTGTGACCAATGTTGTGGAGACTTCTGCTGCAGCGGACAAAAACGAGCCATCAGCCAGTTCAGCGCGAAATTCGGGCGCTTCGTCAACCGATCCGGTGTCCGCTGCTGCACAGGCGGCGGTGAACGCGGCAAATCGGACAGCGAAAATCAGGCGTATCATGATGACCAGGCCTGGTGTCCGGTCCGGTGGCTTCTGTCGCACTGGGGTCATCATTGATCGGAACCGGTCCAATCGGCCAATGATCCCGGCATCGTCTGTGCCCGAGGAGCTCATTGTGCAGTGCCAGGTGGTTTTGCAAGGCAAGTCACGGGATGTGATTGTGCGTGAGTTGCAACGCACCAATTTGAATGTCAACGAGGCGGTGAACAACTTGTTGAGCCGGGACGACGACGAAATGGAAGACTTGGACGAGACGGGCGAGGCGTACCTGCACGAGGAATTGTTGTCCTTGTTGGACGCCGGGTTGCGTTCTGATGGTGATACGGATGGCTACGAGTATGTGATCTCCCGTGACATGGCCCGACGTCGTGATGACCAAAAAGGCAAAGAAGGTGGCAAGGACGGGGAGAGCAACGGGCAGACGGTGCAGGAACATTTTGCATTCGGCGACACCTTGGAATACTGGGGCAACAAAACGGAGACGAATTTCCCAATGCCGGACGGAGTGGACAAATTTACCAAAATTGCCTCAATGAATGCTGAATTGGTGGCACTGGCGGACAACGGCCAACTGTACGCGTGGGCATGGACAAAGGGCAGTGTGCCGTCAAATGTTCCGCATATTGTCAACAGCCAATTTGCAACCACAGCAGACAACAAAATTGTGGACATTGAAACGTGTGCATTGCGTGCCATTGTGCTCACCCAGTCGGGCCGAGTTGGCTCATTTATGGACACTTCCTGTGGCCGCAAATTGGCCGACACATTTTTCGAGCCGTTGATGGACGTGCCGGAGCCAGTGGAACGCATGCTTTGCTGCACGCTTTTCTCGGCCATTCTGTCAAAGGGCGGCACACTGTACTGGAGAGGCATTTTTCCGTTCACCGAGCGGCGCAAATTGTGGGAGAAGGCACGCATGAAGAAGAAGCAGGTGACCAGTGCCAGCAGCAATGACATTGTGGTGGGCTCTGAAGTGCGCACAAAGTCGTCGCCCATTTATTCGGTTGGCTCCGTTGCTGTCAACTTTGCCGGCGGTCTTCCAATGATTGGCACACTTTACGAGGACGCGTGGACACTCAACGAGACATGCCGTTTCCGTGTGCAAACACCGGACAATTACGATGCAATTCCAATCGGAAACGACAAGGACAAGCAGCAACAACAGCAGCAGCATCGGGAAAAGCGCGTATCATTCAGCCTAGCAGTTGGCAATCGAAAAAGAGCCGCCCCAACAGCTTCAGATCAGCAGATGATGATGATGATGGATGAGGAGGGGAGTAATGGAGTTGGTGGTGGTGGTGGAGGTGGAAGTGGAGGAGTTAATAATGCATCTTCCTCCTCACAACAACAACAACAACCAACCTCAAAGGAGTCAGCATGGGCAATCCGTGATGTGGTGTTCATCCATGAAGAGTCGGTGAACGATGTCAGCGTGGTGAAAATTGTGGATGGTGCGTATTGCGGTGTCACTTTCAAGTCCACGCTGGACCGCCTGGAACAGGAAGCGGCTGCTGTCGAGGGTGGTGGTGGTGGCACTTCTGGCGCCGCCGCTCCGTTTGACCTGTCCAAACTGCACATTCGGCTGATGCGCAAGGATGACCTGTTGCCGGTGACGAGCGCGTCGCGTGCCGCTGCCGCCCGCTCGCCAGAGAATTTCCAGGCCCAGTTCAGGCCGGTCCGCCTGCCGTCCAGCGTGCGGCGCATCATTTCACTTGCTGTTGATGGGACGGGCTTCCGCATTCTGTGCGTTAGGAACCACGAGCGCATCCATCTGATCCGGGTTAGCTGCCTTGGCAAACTGCTCAGCGATCATCCGATGCCTTTTGCGCACAATGCGTTGTGCCAACCAACAGACGACGTTGTTGAACAATATCTGCCCGCCGTGAATAATTATGGCGATGAGAACATGTTGCTGATTCGCGACTCCACCGGTGCCTTCCAGCCACTGTTGCGCAACTCGGTGGGCGGCTTCCAAGAACTGTCGTACACCGCGCTTGGCCACTTCTATCTGTTCGGCATGGGAATTCGGTATCTGAAATCGTCGTCGGATGTGAATTTGTTGTCCATTGGCACTGAACCTGCCTCCGCGATTAGCAACAATGGTACTGCCAATGCCAGCAAAGGTGCTGCAAAGGCTGTGGTGCCACCGGGGCAAGCGGGTGCCAAAAATGTCAACCGAATGATGCTGGTTGCGGCACTGATTGCGCCGACACGGCACACAACGAAGCCAATGATTGAGTCACTGATGCAGGCCATTCTCAATTGCGATTTGCCATCGGTCCGTAACATTCTGCAAAAGTTGTCGGAGGAGGATGTCAATTCTGAGGAGCGCAAACGGATTGCATGTGAACGGATTGAAGGCAACCGCAATATTTTACATGTTGCCGTGATGAACGCGTTCGCGAAGACAAACCGTGAACAAGCTGATGTTGAACCAACTGGCGGTTCCGATGCCGCCAACTCGGCCGCCACAGCGTTGTCGAAGGTGTCCAAATGGGCCGAGAAATGGGACAGCACAGAGGCAGACGCGGCTCGGATTCGAAAGTGGCAAGAAATGTTGACATCGAACACCGGCGGTGGTGCAGCTGCTACTGCTGCTGTTGCTGGTGGCGGCGGAACTTCGGCGCCCACAACGCGTGCCAAGGCGGCTGCCGCAGCGGCTGCTGCAGCAGCGAACAAAGACGGAGTTGGCGGCGGAAAAAGTTCAACGACATCGTCGTCGGTCACCGACGCGGCCGCGGCGGCAACCGGAGGCGGCGGAGACACCAGTGGAGTTTCTGCCTTTTCGCTTTCGGTGTTGAAATTTTTTAAAAAACGTGAGGACAATTCTGCTGCTGCAGCTGCTTCGGCTTCTCTTTCCGCTACATCATCACCAGCAAAAAAGGTCATTCCAACAACAACGAAAGAACGCCAAGCGAGTGCCATTGACATTGTGCGTGAGCTGTGCCGAAGTGGGGCGGTGCAGGAACATCTTGTGCTGTTGATGCAACAGCGGGACGTGCACGGCCAAACCGCCTTCCAATGTGCCATCAATTTTCGTGCCTACACCGCCGCCCTGCTGCTGTGGGAGACTGCGGTTGAGCTGCGCGACTGGAGCCAAGATGTTGTTGACATTGTGGCACCAATTGGGGTGGAAAATTCGGACGAATCGGCACTGTTCGCGCTGTGTGCCAATGACACCTGCTCATACACATGGACCGGTGAGGAGCACACACCGCAGGACATTTTTGAGTGCTACGCATGCGGACTGGTCGAAACGCTGTGTTGTTGTACGGAATGCGCATACACTTGTCACCGAAACCATGATTGCAAAATCAAAAAGACCAGCCCCACTGCGTACTGTGATTGTTGGGAGAAGTTTGGTTGCCGTGCACTGATCACCGGCAATTTGGTCAAGCGAGAGCAGTTGCTGAATTTGTTTCTGCAAAACGGCAAATTGGTTGACAAATTGAACGCGCGTGGTGAACATCTGTTGCTGTTTTTGGCCCGAACTGTTGGCCGTCAATTGTTTGAACAAGAAAGCTACACAAAGCGTACCAAGCGACCAGTGCCGCCGAACAATTTGCTCAACGCGGCCGGACAGCGCATTCCCGAGCATGATCTTGAGCCACCAAAATTTGCGCGACGTGCCCTTGAAATTTCACTATCGAACTGGGATGTGGTCAAGAGTTTGTTGGATGTCGGGATGAAGAAACCGCCGGCCGATGATGTGCAAATTTCGGAGAGTGCCTTTCATTTGGGTGAGCAACACGGCTCTACCCATTTGGACAAATTTGTGTTCACACTGCTCGCATCCTGTGAAGAATCGAGTCTGGACACACTGCTCAACCTGTTCATTCGGCACGCAAATCGTAAAGCGGCAAAGGAACCGAGTGCAGAAGTGCATACAATGATTTCGCGCTTTGTCCGTTCCGTTGCGCGACTGTTTGTGCTGGTGGTACTGATTTCACCGAACGCTGTCCGCACATTGTTAGCCACTTCCACGGAGAACATTGGCCGTGCATTTGCGCCCATTGATCCCACAGCGATGTCCGAGTCAACAACAACAACCACAACAGTTGCAGGAGCACAACAGCAACTGCAGCAGCAGAAATTCGTCCTCAGCACATCGGTGCCATCGACCGCCGTCGGAGGGGCCCTCAGCACGCCTTCATCAATTCGTGAAAGTGTGCTTTCGCTTGTCCGTGCCAGTTTGCCTGGGCTGAGCGGACTGGGCAGTGCCAGCGACAAAAAGGACAACAAAAAGAAGAGCGCAATTGCCTTTGTGTTGAAGTGTCGTCGCGTGTTTCAGACTCTGCTCACCTATTCGTTGCACGAGCTGATCGGCCTGGCCGACACGCTGGTGGCACCGCTTCGGCACGGCATTGTGAAGCCGACAAACGCAATGATTGCCAACGAGGATGCCATTGAATTGATCCGGAAGCATCTGAGCACGGAGCAGGACCTGTCCTCGCTGCTCAAGGAAGTGGTGGAAGGCGGTGGCAATTTGGCCAACATGATGATGGGCAGCGGAGGCAACAGTCGGATCAAGAAGTTAGTTGAGCTGCGCAACAGTGAGTCCAGAAGACGTCCTGCTGGCACATCCGCTGGTGGCATAGGCGGTGGAGCAGCGGGCGCTGACGGGGCCATGGAACATGTGGCCCACAGTGACGATGAAATGTCGAACGAAGAAGACGAGGAGGATGACGAGATGGAAAACGGTGGCGGTGCGGGCAGCCAGGCGGCCTCTTCATTGTACCACCATCGCGCGCGCGAGAACAGCAGCACTTCCATGGACCGGTTGCAGCGTGAGCGGACCGCGTCCGGCGGTGGAAGCGGACGGCGTGGCGGCGTTGGCAGCAGTGCCGCGGAACGGTCGACACAGGCGGCTTCAGCGGTTGCAGCGGCGTCAGCCGCTGGCGACGATGACGACGAGGAAGAGGAGGCGATGGGCACCAACAACGAGGAGGAACAGGAGCAACAGCATGACATTGGGGCGGTTGAGGATGAACATGACGAGGAGGACGAGGACGCCAGTGAACATGAAATGGAGGAGGATGAAGAGGATGAGCCCTATTTTGACGTCCACGATGATGAGGATGACGACGACGATGATGATGATGATGAGGACGATGACGACGATGACGCGTCATCGGTAAAAATTTTCCAACCTTCGGAAAAAAATTTTCATATTTATAATCCATCGGATGCGGAGGCGGGCGATTCCAACGACACTGTTCCGGTGATGCGAACGGGTGGCGGTGGAGCACAATCGACACCATCCGCCGCTGCTGCTGCTGTTGCTGCAGCAACGACGGGGAATGGTGGTGGCACGGGTGGCGCCGGAGATGTACGCATTGAACTTGCCCAGTCGGCGGCGGACGCTGCGGCGGTGGACAATTTCTTGGCCACCGTTGATGACGACGGCGGTGTTGGTGGTGGTGCTGCTCGTGGAGGACAACCAACTGCGACAGACACGGCGGCGACGACGACGGCACCGTCAAGTGGAAGCAGTACAAACACCAACAACAATAACATTTTTTTGGCTGGCGGCAATGACCAATTTGATGTCACTACCACCACCACGTCAACAACGACCGGCACTGGCAGTGCCACAAACAGCACCAACAATGCCAACGCAAACAGCGGTGGTGGTGCTGCAGGCCGAACTGCTCCAACCGGTGACCGGGCGTCGGCCATTGACAGTGCATTCCGTGAACCGGCGCTGGAGGGCAGGGCGTTGACCCATCGCCTTTGGCGCACCTCCGCTTTGGCTGGTGCACCGCCGCCAACAGCAACAAATGGTACTGGCGGCGGCACACCATCGGCAACAACACCGAGTGCCACCACAACATCAACAACAAACGCAGCAGCAGTCAATGGCATTGGCGCGCCGCCGGAGGCATTCATTGCGGAGGACTACCAGTACATGCAGAGCAACACCAGCACACAGTTGGCCTTATGCTTCTCAATTCTTGTCAAACTGTGCGATGAATTGCTCGTCCAGCTGATGTGCCATGCCAAATGGAAGGAGCAAATGAGCCGTGTGAAGGGCATTTACACATTCCTGGACATTGATACGGACAACAACAAGCTGTACATGGAGCTTAAGAATTTGATGGCCGAAAATTTGGAACCAACATGGAATTGGCTTCACGTCATAATGGACAGAACCGAGGCGCAGCTGAAGTACAGCCAGGCGATCAGTCAGTCAATTGTTGGCCCAATGGTTTCCCCGTGGGCGGGCACTGAACGTGACGAAAGCGGCGGTGCACAACCATCCGCAACAGGAACAGGCGGTGCACTTGGCAGCACCAGCACATCGACCACAACGAACGCAATTGATGCTCAACAACAATTTCCGGGCGGAGGACAACACCGTCCGATCAGTCGTCATCCTGGCACAGGGCCCGGCGCAGGCGTCGCAGGAGGCACCGGGGCGACAAACAGTTCAATTGCGGCTGCAGCGATTGCGGCCGCGACGGGCGCGGATACAGCTGCGGCCCAGCAGCGACGCTTCCGCAAGAAAGGGGACGCGGGCGGCGGTGGTGGCGGCGGACGCAAACCGCCGGGTGCCAGCGGTTCGGCAGACAGTGACGTGGCGGAACACGGCGCGGCCCGTGCCGACTTCTTTGCCTACTTCATGTCGTTGATGCGCAGCTATTCCGCAGAAAGTGGTGACGATTCGCCAGTGCTTGAGTACACCGCTTTGCGCAATGTTGCATTTGTGGCCGAAGCGTATTTCTTCCACATGATTTTTGGTGACCAACTCAAACAATTGGAGTTGGAGCATGGCATTGGTATCGCTGATGATGATGATGGGGCTGATGAAGTGGCAAATGACGACGAAGAAACACCGATGGAAATGGACGGTATAAGTGCGAAACCGAATACGTGTCATGTGCGAAAATTGCGACGTTTCTACCGACGCTCAAGCTCCATTTCATATCCGACATTGAGCACTGCCGAACAACATCACGCATTCACATTCACTGCTGCTGAGGCGCTTCCACTTACGGCACGTTCCCATTTGTTAAGTGCCGATGCTGAACGCAATGCACTGTTCGCACTGCCGATTTCGGACCGGAGCCGTGCTGGGCACAGGGCTATTGCCACGAAACTTGGCGTGCCGTACCCGACCAACCAAAGTCTGTCCCGTTTGCCTGTCCAATACGGTGACATTCTGCGTCGACTTTCTCCTACTCACCGGCGCGATGCGCATAAACAGCGGTCGGTCAGTGTGACGGTGAAACATTTTGCTGACGACGATGATGAACAACGACAACAGTCCAAACAGCAACAGAGCACAACACCAACCAGCATCAATGACGACATTCTGTTGAACAGTCAGTTGGGCTTGGACAGCACATTCCAACTGTACCTGGGACGATGGAGCAACACGGTGACAATGTTTGCAAGGACTTACCATGAAGAGTTGACCAACCGGTTTGGAGGCGACTATTCACACTCGGTGCTGCTGAACAAAACAGGAGTGTGCAGCTTTGCCATCCGACTTTTGCAATTCCGGAAGCAAATGGACAAACTGAAAACCGTACAAGCAAAGGACTTAATCTTTTCGCAAATGCCACGTGAAAAATACGCGCTCGTCCAGCACACGTTCCGTCAACTGAACCAGGCGTACGTCAAACGGTTGCACAGTGCGGGCAGCAGTGCCAGTGCCAATTTGTCGTCGACAGTGGCAACCGCCGGTGCTGGTGGTGGTGCTACCGCTGAGAGCGGTGGCACATCATCCAGTGATCAGCAACGGTACTCATCATCAGCAACCAGCACAGCTGTTGCAGCACCGTTGTTGACCTCGCACAAGGTCAAAGTCACATTTCGTGATGAGCCGGGCGAAGGCACCGGTGTGGCACGACATTTCTACGCCGCGTTGGCGGACGCGTTCACCACCATCAAGCACTTGCCACAGTTGGACAATGTGTACGAGGATGGCACCAATCGGCCGACATCGCTGGTGCCAACCGCAGATTCGTCCTCCTCCTCAACAACACCATCGTCTGCCACTGGTGCTGGTGGTCAACAAGCATCATCCACCAGCGGATCAGGGCGTTCATCAACAACACCAGCAAAATCGGTTGCACAAAAGGCGCGTGCCATTGCCGCGGCGACAGCGAAAATTGGTGGCACTGGTGCCGGTCAGCAGGGCCAAACATCGGCTTCTGGCACTGCTGCAACAACGCCGGCGGCGGCTTCGGTTCCAATTTCACCGGACACACAGCCGTTGTTCTACCGGACATCAAAAAGTGGCGGCTTTTTCACCCCAATTGCGGGTTCCAATTCGCCGCAGCGGTTGAACGCGTTTCGCAATGTGGGCCGAATTATTGGATTCTGTCTTCAAAACACGGAGATCATCCCATTGCCATTGTGTCGGCATGTGCTCAAATTCATTCTGAACCGTCCGCTCAATTGGTTCGACTTGGCCTTCTTTGACCCGTCACTGTTCGACTCGTTGCGTCACATTGTGTACAATGAGCAGACCGACGCCTACCATCCATCCGAATTTTATGAGCAATTGGAATTGACATTTTCGGTCGATTTGCCGGCCGAGGAGGGTGGTGGTCACATCGAGCTGAAACCGGACGGTGCGAACATCGCGGTGACGCGAGACAATGTGTTGGAGTACATTTGTCTGTTTGTGGAGCATCGTCTGTTGGGCAACCATCGGCCATGTTTGGAAGCAATTCGACGTGGCGTTTTCGATGTGCTGCCGTCAGACGCGTTGGCAAATTTGACGTCCGAGGATCTGCGACTGATTCTGTGCGGCACCCAAGAGTTCTCCATCCAACTGTTGCAGAATTTCACCAAATTTTTGGACGAAAGTTCGGCCGCCCCGGAAGTGTTGGCCAAGTACAAGAAGGTGTTTTGGAGTGTTGTGAACCGGCTGAACTCGGCGGAGAAACAGGAGCTGTGCTTCTTTTGGACCGGTTCTCCAAATCTGCCATCTTCGGAGGAGGGTTTCCGACCGTTGCCAACCATCATGATTCGCCCGGCTGATGACCAGCATTTGCCAACGGCCAACACGTGTATTTCTCGTCTGTACCTGCCCATCTATTCGTCAAAGAAGCTGTTGAGGGACAAACTTTCGCTTGCGATCAAAGCACGCAACTTTGGCTTTGTCTGA
>Hetgly06168.t1 gene=Hg167
AGACGCTTAATTATTATTATTATTTTTTTGTTTTTGTCACGCCAAAACGCAGCAATTTGGTGAACCGTTCGACAGAAAAGGCATAAGCAAATGACAGAATATAAGTTGGTCGTCGTCGGTGACGGCGGTGTTGGCAAATCGGCGCTGACCATCCAATTAATCCAGGGCCAATTCATTGAGGAGTACGACCCGACCATTGAAGACTCGTATCGAAAACAGGTACTTATTGACGGTGAGACTTGTTTGCTGGACATTTTGGACACCGCAGGACAGGAAGAGTATTCAGCGATGCGGGATCAGTACATGCGCACGGGTGAGGGCTTTCTGCTGGTCTTCGCGCTGAACGAGTACAAATCCTTCGAGAACATCCATGCCTACCGTGAACAGATCAGACGGGTCAAGGACAGTGACGAAGTGCCGATGGTGTTGGTGGGCAACAAATGTGACTTGGCACAGCGCGCCATGGACCAGCGCTCCATCCAGGAGTTGGCCCGCTCATTTGGCATTCCGTTCATTGAAACGAGCGCAAAAACGCGACGGCACGTTGACGAGGCATTCCATGCATTGGTGCGCGAAATTCGTAAACACAAGGACAAACACCGGGAGAAGCCGAAACGGAGAAAGCGCTGTGCCGTCCTCTGACGAAAGAAGGGGAAAATTTAAACCAAAAAAAGTCGTCCAAGTCCAAACTTCCTTTTCCTCCTGAAGCCCTTCTCCTCTCCTCCTACCGTACACCACCGCCTATAATATCACATTCATTGTGGGACATTTTTTCCGTTTTTCTTGTCTTCTCTTTTTCTTTCTTTTTGAAAATCCAAATTCATCGACGCCTCATCATCCCGGATCAAAAAATGAGACAGCATTTTGCATAAATATTATTATTTAAAAAAAAACAAATAAATATTGAAAAAGTTAA
>Hg167.1 gene=Hg167
AGACGCTTAATTATTATTATTATTTTTTTGTTTTTGTCACGCCAAAACGCAGCAATTTGGTGAACCGTTCGACAGAAAAGGCATAAGCAAATGACAGAATATAAGGTCGGTTCTATGTATGCAATCTGTGGGCCCAAACCCTCAGTCAAAATAGGAAATTTCTCTGATTTTTCTTCTGATTTTTGTAAAGTTCTCAACCAAATCGAAAATTTCCGTTTTTTTTCATCAAAATTGAGGAAAATTTGTTCCTATTTTCTTCTTTTTACATAATTTGGCTTAATTTAGTCCCAAAATTCACATGAAAATCTTGTTGATTTGATCAATTTTTCCCAATTTTTCAGTTGGTCGTCGTCGGTGACGGCGGTGTTGGCAAATCGGTGGATGGAATTTTTTGGCATTTTTTACTGGAAAACATTGACCCCCACTTTTAGGCGCTGACCATCCAATTAATCCAGGGCCAATTCATTGAGGAGTACGACCCGACCATTGAAGACTCGTATCGAAAACAGGTTTATTTTTTCGCTCCGCGAAATTAGCTAACTCGAAAAAAGAATTTTGACAATTCCTTAGTAAATGGTTTTTTTTTCTTTGAAAATTCACTGATTTCATGGACCCATTCTAAGCCTTTTTAGGCAATGGTAAAGAATTGTGGTCCCGGATTTATTTTTAAAAAAATTTATTTTTTATTTTGGGCTCGAAACCAATTTTAAGAGGTTTTCGAGGGTGCTGATTACGGATCTCAACTCGGATTTACCCAATTCCGAACCCCGGACCCGAACTCGAACAAAAAGTTGAAAAATTTTCCAAGAATTACTTTTTTTGGGGGGTAATTGTAAATGCTTCTAATTCATTTAACAATTATTTTTTTGATGTAAAACAATGCTTCAACTGTTAATTGGATAAAAATGCGCAATTTTCGCCAAAATTTGACCGGTTATAACTTATATTTTGGAAAAAAAAATTTCAACTTTTTGTTCGAATTCTGGTCCGGGGTTCGGAATTGGGCAAATCCGAGTTCAGATTCATAATCAGCACCCTCGAAAACCCCAGGAAACTGAATTTTAGTCCAAAATAAAAAAAGTTAAAATAGGGGGCACTATATGGAAAGTGACAGTTTTTGATTTCAAAAGGGGGGACCCTTTTGTTTTGCAAAATTTTTTTTGTGATAGTCATAAAAATTTATTCTCTGGAGTTTTTGGGGTCCCCGATCACGAATCCTTCAATTATTTTGATCAATTCCGATTTCCTAATCTAAATTTGAACAAAAAAGTGTCGTAAACATTCGAATTTTCGAGTCCTCTTTTTTCCAAAGATTGTTATATGACTTCAACCAAATAGCGCCCACCCGTAAAACTATAATTTTATCTGAAGAGTTTGAATTTTCGATAATTTTTTAGTGACGTAAATCCTTACTCTTTGTCGCCGCAATAAAAAAATATTTAAAAAATTTTGCATTAAAATTTCAGAAATTTCTTTAGGTACTTATTGACGGTGAGACTTGTTTGCTGGACATTTTGGACACCGCAGGACAGGTATACTGAACTCTTCCGTCTAACTTAGCAAAAAAAAAAAAAAAATTTTTTTTGGCGACCATCAAAATACCGAGGCTTTCTTGGTTTTTTTTTTTGAGATGCATTGACAATCTGCAAAAAGCCACTTCCAATCCCCCTGTCCTCCATAGGTGGACAAGGGGGGGGGGGGTCAATTTCGTAAATCGTACGATTGGTTAGCCAAAATGCGTAAAGACGCGACCAAAAAAAAATTTTTTTTTTTCAGTTTTGGCTTTTTTTAAAATTTATTTCCATCCTTTTGCAGGAAGAGTATTCAGCGATGCGGGATCAGTACATGCGCACGGGTGAGGGCTTTCTGCTGGTCTTCGCGCTGAACGAGTACAAATCCTTCGAGAACATCCATGCCTACCGTGAACAGATCAGACGGGTCAAGGACAGTGACGAAGTGCCGATGGTGTTGGTGGGCAACAAATGTGACTTGGCACAGCGCGCCATGGACCAGCGCTCCATCCAGGAGTTGGCCCGCTCATTTGGCATTCCGTTCATTGAAACGAGCGCAAAAACGCGACGGCACGTTGACGAGGCATTCCATGCATTGGTGCGCGAAATTCGTAAACACAAGGACAAACACCGGGAGAAGCCGAAACGGAGAAAGCGCTGTGCCGTCCTCTGACGAAAGAAGGGGAAAATTTAAACCAAAAAAAGTCGTCCAAGTCCAAACTTCCTTTTCCTCCTGAAGCCCTTCTCCTCTCCTCCTACCGTACACCACCGCCTATAATATCACATTCATTGTGGGACATTTTTTCCGTTTTTCTTGTCTTCTCTTTTTCTTTCTTTTTGAAAATCCAAATTCATCGACGCCTCATCATCCCGGATCAAAAAATGAGACAGCATTTTGCATAAATATTATTATTTAAAAAAAAACAAATAAATATTGAAAAAGTTAA
>Hetgly06169.t1 gene=Hetgly06169
ATGCCTAGAAAACGTTCATTGACTGGCAAAAATGACAATGCTCTTCGCCGAAACAGGGTGTCTTCGTCTTCCAATATTGACACAAGACAAGAAGAGTCCGAAACTGCTGTTTTCTGTGACCAGGAGCAGGACAATTTGACGAATACTCCGACAACGCCCGTGGCAAAAAGCCAAAAATTGGATCAACCTTTTTCGACATCAATGGCGCCATTGACTCAAGCTCAAACTGAGCAAGTGCGCATTGACTCTTTATCAAAAAGTGACGTCGACCAGCAAAGCGTGGACCACGGACCAAAGGCCCGGGGACGCCCGCCAAAAAAGATCAGGCGCCCAGGCCGAACGAACATGACAAACACTGTTGGGAATGGTGGCACCCCTTTGTTTGCTGACAGCCCGTCCGGCAGGGGCGACAGTGGTGTAAATTCACGCAGAATTATGCTAAACATAATTGGACTCGCTGCAAGGGCGATTGAGATTGTACATCTGCTGCTCAATGTCAACAGAATGCGCAGGCCTACATTGCCGCTGCAAAATATGACCGTTGATTATTATGACAGCGGTCAATTCGGCGATGCAAACTGTCAGCATTGTGGTGCTGTTTTGCTAGCCAGTGAAGCATATGGGCATCGAGCATCTAATTGCTCTATTGGGGGTTCATGGTCTCGCAACTCACTTGGGCAGCTCATTCGCAGGGGTGGGCAACCACGATGTTTTGTCTGTTGCCTCAATACCGATCATATGAGCGCTGATTGCCCTTATAGGGCTCGAACAACTCAATGTTGGAATTTCCACACCAAACTGCAAGGGCGTGCGCAAAAGCAGAACACCTGTTGGAACTGCCATGAACCTCTGCGCTGTTGGAATTGTGTCGCTGGACATAGGCTGAAAGATTGTCCTAAACCACGAAGAGCGCCCCAAAGCAGCAAGGGCGGAAATAACGCGCAACCGAAACCGCCGCGAGAACAGCGCTTTTGGGGCAAATAA
>Hetgly06170.t1 gene=Hg175
TTTTTTTTTCAAATTTAGATTTTTGTTTATTTATGGATTTAGTTTTTTAAATATCAAATGAGTGGGACGATCACAAGGTGTGATCGGGTTTTCCGACGGGGGAGTCGGAGGCCAAGATTTTGATTGAATAGCCATTTCATTGATTTGATCAAATTTGGTAAAAAATGTGATGATTTATTTAAAAAATTTAATTTGAAATTTTTTCAAAAATGTTTTTTGTTTTTTCTCAGATGGCCACGTGCTCCATGTTGCAGTCCATCTTTTCCAAGTATTGAGCCGGCAGTTTTTTGGTCCGTGCTGTCTCAGCGACTTCATTTTTTATATTTTTGTTATTCAGAATTTTTTCTTAACAACAAAATCAATTAAAGCAAAACAATGTTAATAATAAATAGAAAAGAAAAAATGGAAAATGAAAAATGAAAATATTATTGGCTTCGTCTGATGACTTTTTGTGGCATTTTTTAAGGCATGAGCTGCCACCGAAGCGTTTTTTCAGTGTGTTTGACCCATTTGATGACGAATACAAACATTGGAACAAATACGGCTCAAAACGGATGGACGAGCGATTGAACAGACAATGCTATTACCACAACAAGCGGCATTATTTTCCATTAACTCGTCATCTATCGATTGAACCACCGGCCAATTTGGCTGATGCCTTGGGAATGCACACTCCAAATTGGGCTTTTTATCACTACAGTTCGCCCAATTATCGGTCAGCGTGGCCATGGCGAATGTTCCGTGACCGTTTCGATTGTGAACAAATCATGTACAATAAGCACTTCTCTGTGCAGCCCATCTACAGAAATGTGCCATTGAAGGTGCCATCGCACAGAACCAATTTTTCCAACCACCAAAGAGCTGGTTATTGGTCATTTGACTACGATTATATGTAA
>Hetgly06171.t1 gene=Hetgly06171
ATGTCATCATTATCTCCCGAAAAAATTATGCCTCAAGCTTCGTCTCCAAAAAAGGCAAAAGTTGAAAATAAGGACATGCGGCACCGTTTTGTCAACTTTAGCTCCTGGCTAGATCAGCTGGAGGCATGGGCTGCTGACAACAAGGAAACGAAATTTGTGCGTCCCGACACACGCAAACGAGCGTTATTGGATGATTCACCAGAGAATGAAAGGCCGGCAACATCAAATGCTGCTTCCGGTGGACATCAACAATGCTTTCAAGAAGAATTTTTTGAGGTCAAGCTCAAAAAATTCATGGAAGAGAAGTTGGAGGAGGCGAAGGTCTGCGCGGAATTCGCAGCCTTGGCAGCGAGGCAATGTTTGGGAGGAAAGAGTGCGCACACGTCAATGTGTGCGCCGATTGTTCAATTGTGGCTGGCCGTGATTGAACGGTCATCAGCGCCTCGTCGACCTGCACCACAGGAACGACCAGCGGATGATGGCAGACGCACGGGCCACCTCATGGAATTGCTGCGTGGACTGCAAGCTGGTTTGGACGGCGTGCGCGCTGACAATGCGCAAGTGATCAGAGAAATTGGGGAATTGCGCGCACAAGTGATCAGAGAAGTGTCTTTGATATCACATCAGTTGTAA
>Hetgly06172.t1 gene=Hetgly06172
TGGTACTTGTCACTCTCTTTTGCGCCAACCTCCTCTCTTTCTCACCTATGTCTCTTCGAGATCGATTTAACCACCCGACGGCCGCTCGAATGTGTTGAAAGAGTTGACGGAAAAAAAGTTAAGACAACCTACAAAGACCGCAATGGGATGAACAAAAAGTTTTTTGTTGGCGGCATTAGTGAGCGCGGTGCTGCCTTTATTCCCGCTTATGGGAAGTTACGGTCACCAAACAACATAAATGTTCGTTTTTCTAGCGGGGAGGACCGTTTCTATCCAATGGAGTTGCTCGAAATTGTGGAGGACCAAGACAAAAGAAGATGGCTTGGACGCTTGTTTATGGAAATTCGTGATAATGATGATGAAGATGATGATTCAATATCAATTGAATCATCATCATCATCATTACGATTGGTCAACGGAAGAAATGAATGTTCCCAAATGTGGTGA
>Hetgly06173.t1 gene=Hg178
AGAAAAATTGTGTGCTTAATCATTCAAAATGATTGCAATTCCAATTATTCTTATATTTTTTGTTCAACCGGTTATTTGTTTAAAAATTTTATGCTTCATACACAGCAAAATGTTTGAAGCAAATTCTTTTCTTCAACAACAACCAAACTGTTCACATTTGGTCATTAAAGATTTCGCAAAAATTGGATTAAAGGAATTCAAAGCGGATTTGAATGCACGTTATAAGGCACAATATCTGAAGGCTTCTGCTCCTCCACACAATTTAAAACTGTTTGCCGAAATGTCACCAAAAAATGGCAACACACTGGTCTTTCCCATTGGCATTGAAGGGCAGAAAAATTTTGTTCAAAAATTAAAAAGAAATTTACGGCATCTCCGTTCTTTGAACCCATTGACTGGAAAGCCAATTTTTAGCGGACTATTTTTTCGTGCCGCTGCATTCCAAAAAGAAGGCGAATTTTTTGGCTTTTTCCCTTTATTGGCCAAATTACGTGAAGAAAAGTTGCGCAAAAAGAATACACCGTCGTTTGGTGAATTTATGCTTGATAATGATGACATTTTAATTTATTTTAATTTAGGAAATTTCCGAAATTGGACCAACGGCAAAAATCGACGCAGTTCAACTAAATCCACTTTTCGTTTCAAATGGCGCGAACCCAATTTTCACACTTATATACCAAAAAGATATGTTGGAACATCTTGGAATTTTCAATAAGACAGTCATCGGATTTTCTGCATTGGGCTATGAAATCATGCGCAAAAATGACGGCGTTTTGGATTTAAACAAATTTACGAAATTGAACATTTCAATGATTTGTTCAATTCTTTACGGTGAAAGAAGGAGCGTACTGTATGACAGACAATCATTGACAACGTCCTTTTTACGTACTAACACATTTGTCATATTCAACATGCCATACCAAAAATCACTCAAAGAAAGGGTCCGCTGGATTTCGCAAAATGATTTCTATGGTGTTGGGTTTGACAGTATGGAAAGTGATCTGGACAAAAACAATGTGTGCCAATTCCAAACAACATTTCCATTACATGATTATCTCAACAAAATTAATCGGGATTTGGAAGTTGAGCAAAAATTTAAATCAGAGCGCCAGCTTAAACGTTTTATTAACTTTGCCAAAACAAGGAGTTCTCCACCAATAAATTCTGATGTGCATCCAATTTCCAATATTTCAATTTCGATGAAAAATTTTCCAATTGGCCCGTATGAATTATTCGATTTTCAGAACAAGTCGGAAAGTGTAATGATTGAAGCTGTGCAACAAGACGCAAATGAAACTGATCAATCATCGGGCATTGCAAATATGATTGAGATAATTGATCCTTTGAAATGCAGCGAGCTTTGTGGGGTTGCCGATGAACTTTTTATTGAAAAAGATGAACATCAAAGCTTTCGTACAATTGGCGGCGAAGTCATCACCGACAACTATTATCCATGGGTTGTTTTTGTCCGAGTCCACGTGCATTGTGCATATTCGGCCCCAATCTACATTCACTGTACCGGAGTGCTTATATCGTTTAAGCATGTCATGACGGCTGCTCATTGCATGCATTTAAATACAACCATGTTAAATGAGTGCATTGGCTGGATGAAATTTGTTCCAGCTGGATGGAAGAAAACCGAGTTGCACGACGTTTACATTCATTTTGGTTCATCTTCTATGAGTGAAACACAAATTGCAAAAGTTCGGAGAATTTCAATTGTCAAAGATTTTGACATGTCTCATGACAATTTATTACGGCCCGACGATCTTGCCATTCTCGAGCTAAGCCGTACATTAGACCGAAAAGCGGACAATGTTGTTCCGATTTGCTTGTATAAAAATTGTTGTTATAATGAGCATATGGGCGAGATGGCAATCGTCGCTGGTTACGGTGGCTTCTACGAAGACACATCAAACTACTTAAACAAAAGCCAGACAGCAACTTTAGTGCCAATACGGTCCGCAATTTATTGCAACAAAATTTACAACAACATTTTGCCTTGGAAATACAATCCAAGCAAATTTGTATGCGCAAGCAGCAGAAATAAGGGCATTACAAGCGGCGATTGTGGCGGCCCGTTGATGATTGAAAGAAATGGATTGCATTATTTAATTGGCATTGTAATTGCAGCGTATCACCCAAAACCAGGATTCTACAGGAAATACGTGCCTGATGTTTATACTCGTGTGAACTCCTTTGATAGTTGCGGTTTTGTGGAACTGGTCACAAACAATGAAGCTACATGTTTTCAAGAATTTGTAAAGTCTGACCGACTTGAAACAGTTTGTGCAACACAACACGCGGAGATTTTGGAAAAGACCTTAAGAAAAAGTTGCGAATATGTTTCTGTGGATCAAACTTGTTACATTGGCATGATGCCATTTTCCCACCCTTAAAACATTTAAGCACTCCCAGCAATTTTTCCCCCCAAAAAAAGCAATTAAGGAATCAAAAAGTAATTCAATCAAAAATTGTATTATTAGTAATAATTCACAATCCATTTAAAACATTTTGAATTTATTGATTTTGATTGATAAATTTGTTTTTGCA
>Hetgly06174.t1 gene=Hg180
AGAAAAATTGTGTGCTTAATCATTCAAAATGATTGCAATTCCAATTATTCTTATATTCTTTGTTCAACCGGCGATTTGTTTAAAAATTGTATGCTTCACACACAGCAAAATGTTTGAAGCAAATTCTTTTCTTCAACAACAACCAAACTGTTCACATTTGGTCATTAAAGATTTCGCAAAAATTGGATTAAAGGAATTCAAAGCGGATTTGAATGCACGTTATAAGGCACAATATCTGAAGGCTTCTGCTCCTCCACATAATTTAAAACTGTTTGCCGAAATGTCACCAAAAAATGGCAACACACTGGTCTTTCCCATTGGCATTGAAGGGCAGAAAAATTTTGTTCAAAAATTAAAAAGAAATTTACGGCATCTCCGTTCTTTGAACCCATTGACTGGAAAGCCAATTTTTAGCGGACTATTTTTTCGTGCCGCTGCATTCCAAAAAGAAGGCGAATTTTTTGGCTTTTTCCCTTTATTGGCCAAATTACGTGAAGAAAAGTTGCGCAAAAAGAATACACCGTCGTTTGGTGAATTTATGCTTGGCATTGATTCCCATTTTAATCCGTACACCATCGGTTTCCCTGCTAATAAGTCAATTGCCAATCTCATTGACATTTTCTACCTTTCCATGATGTCAGACGGTTTGATCAAGGAAATTTCCGAAATTGGACCAACGGCAAAAATCGACGCAGTTCAACTAAATCCACTTTTCGTTTCAAATGGCGCGAACCCAATTTTCACACTTATATACCAAAAAGATATGTTGGAACATCTTGGAATTTTCAATAAGACAGTCATCGGATTTTCTGCATTGGGCTATGAAATCATGCGCAAAAATGACGGCGTTTTGGATTTAAACAAATTTACGAAATTGAACATTTCAATGATTTGTTCAATTCTTTACGGTGAAAGAAGGAGCGTACTGTATGACAGACAATCATTGACAACGTCCTTTTTACGTCATAACACATTTGTCATATTCAACATGCCATACCAAAAATCACTCAAAGAAAGGGTACGGTGGATTTTTCAAAATTCCAGGTTCTTGATTTTTGACTATGGAAAGTGATCTGGACAAAAACAATGTGTGCCAATTCCAAACAACATTTCCATTACATGATTATCTCAACAAAATTAATCGGGATTTGGAAGTTGAGCAAAAATTTAAATCAGAGCGCCAGCTTAAACGTTTTATTAACTTTGCCAAAACAAGGAGTTCTCCACCAATAAATTCTGATGTGCATCCAATTTCCAATATTTCAATTTCGATGAAAAATTTTCCAATTGGCCCGTATGAATTATTCGATTTTCAGAACAAGTCGGAAAGTGTAATGATTGAAGCTGTGAAACAAGACGCAAATGAAACTGATCAATCATCCGGCATTGCAAATATGATTGAGATAATTGATCCTTTGAAATGCAGCGAGCTTTGTGGGGTTGCCGATGAACTTTTTATTGAAAAAGATGAACATCAAAGCTTTCGTACAATTGGCGGCGAAGTCATCACCGACAACTATTATCCATGGGTTGTTTTTGTCCGAGTCCACGTGGATTGTGCATATTCGGCCCCAATCTACATTCACTGTACCGGAGTGCTTATATCGTTTAAGCATGTCATGACGGCTGCTCATTGCATGCATTTAAATACAACCATGTTAAATGAGTGCATTGGCTGGATGAAATTTTTTCCAGCTGGATGGAAGAAAACCGAGTTGCACGACGTTTACATTCATTTTGGTTCATCTTCTATGAGTGAAACAAAAATTGAAAAAGTTCGGAGAATTTCAATTCTCAAAGATTTTGACATGTCTCATGACAATTTATTACGGCCCGACGATCTTGCCATTCTCGAGCTAAGCCGAACATTAGACCGAAAAGCGGACAATGTTGTTCCGATTTGCTTGTATAAAAATTGTTGTTATAATGAGCATATGGGCGAGATGGCAATCGTCGCTGGTTACGGTGGCTTCTACGAAGACACGTCAAACTACTTAAACAAAAGCCAGACAGCAACTTTAGTGCCAATACGGTCCGCAATTTATTGCAACAAAATTTACAACAACATTTTGCCTTGGAAATACAATCCAAGCAAATTTGTATGCGCAAGCAGCAGAAATAAGGGCATTACAAGCGGCGATTGTGGCGGCCCTTTGATGATTGAACGAAACGGATTGTATTATTTAATTGGCATTGTAATTGCAGCGTATCACCCAAAAGCAGGATTCTACAGGAAATACGTTCCTGATGTTTATACTCGTGTGAACTCCTTTGATAGTTGCGGTTTTGTGGAACTGGTCACAAACAATGAAGCTACATGTTTTCAAGAATTTTTAAAGTCTGACCGACTTGAAACAGTTTGTGCAACACAACACGCGCAGATTTTGGAAAAGACCTTAAGAAAAAGTTGCGAATATGTTTCCGTGGATCAAATGTGTTACATTGGCATGATGCCATTTTCCCACCCTTAAAACATTTAAGCACTCCCAGCAATTACCCCCCCCCCCAAAAGCAATTAAGGAATCAAAACTAATTCAATCAAAAATTGTATTATTAGTAATAATTCACAATCCATTTAAAACATTTTGAATTTATTAATTTTGATTGATAAATTTGTTTTT
>Hetgly06175.t1 gene=Hg182
ATGCGCGATCAGTGCGCGATGTTGAGCAAATCAAACAGCGATACAAAAAAAAATCCCCCAACCGGCGGAGGAAAAGCGCCGGAAAGAAAACCATTTTATGAGATATTTGACCGATTTATGGCAGATGACAGCCGGATTGCAGGAATATGTGAAAGTCCTTTGGAATTAGGTCCGGCGAAGCAGCAGCAATTGTCCGATGCTGGTGGCCTACCATCATCAAGTTCTGCTACTGTTGCTGCTGATCCCGAGGCGTCTGGATCGTTTCCGCTCTCATTCACTGATTTGACCCCGATTCGTTCAAAGTCAGTGAAGATTGAAGCAAAAAGGCGAAAAGTTGAAACGGCACTGTTGACGACAAAAATTTGTGAAACTGCTGCTGCTGCTGAATTGCCAACACTGAAGGAAATGCAACTCAAAGTGCTTGAAAAGGAGGACGCAAAATTGACGTTGGAAATTCGAAAACTCGAACTCGAGTTGGAAGTTTTGGAGTTGAAAAAAGAAAAACAAACCCGAAAATTATTGGCAAATTTTTAA
>Hetgly06176.t1 gene=Hg183
ATGGCTGCTGCTGCTGCTGGTAGACCATCCCGCTGGCTGTCACTGCAGGGACAAAAACTGTTCAACAGCAACATCAGCAGCAGTGTGCCACTGTTCTGCTGCTGGCCAACAGTGACATTTGCTTATTGTGCAGCAGTGATTGGACATCATCAGCAATGGGTCGGGCTAAAACTGCGCAAAATGTTCAACGGAGAGCAGCAACAACAACAAAGCGATGCAAATGGCACCGGGACAGGAGGAGGAGGAGGACGCCGAGGGACCAATCCGCGCCGTCGCAGTGCCAATGGAGACGCTCCGGAGAGGAACAATGGGAGGAAACGGGCACGTGAAGACAGCACGAGCAATGGCGGCAGCAGCAACCAAAGTGGCACAGCCACTTCAAGTGTGCGGCACCCGCTGTACGGCAACAACGGCGGAGGCGGCATCGGTGCCGCGCTCGATTTGGACATGCTTTTGGCGCCAATGCCACAGCAGTTCCGCGGTGCAACAAGCGCTGCTGGTGCCGGTGTTGCCCAAGTGCCAGCAGCGAACAGTGCAACTGCTTCTTCTTCTGCTGCTTCTTCGGGTGTTGTGCCGACGCGGTTTTTGGACAGCAATGTTGGCTTCGCAAGGCCGAGTGATGGCGTCGGTGGTGGTGTTGGCGGCGACGGTGGACAATTAGCCATGGCACACATGCAGTTTGGGCTGTCAGCAGGCGGTGGAAGTGGTGGCAGCAGTGATCAACAGCAGAATTTGCAGCCAGTGAGCTGCATGCGTGGCGTGCCGGCGGCGGTGGCGACCACGATTTGGACTGGTTCGTCCAATGCCGGCACTTTTGTCAACAGCGGGTGTGCTGCTGCTGCAGCTTTCGGTGGTGGTGGCATTTTTGGGAGCACGACGCTGCGTAGCTTTACGATTGAGCGCGTCCACTCGAGGCAAATGCAGCGCATGGTTACTGCACAGCCCGACTTTGCCGACATTCTCCCACCATGTGCTGACAACGGGATGTCAAATACCGCTTGGCTCCTTTTGGATTGGCAACCCGACATGCTAATTGGGCGTGTTGTTGGGCTTGTCGTGTTGTGTGGTCCGTTCACCACGATGGGTGGTCTGAACGGCTTCGACGTGCGCCTCATCTTCGACCAACACAACACCCAACAGGAAATGGCCGTCCACTGTTGGGAGGATTGCATGCCACGCCTTGCCAACAACATTCAGTGCGGCCAGATCGTCGAATTCAGTCGTCTTAAAGTTCGGGAGCAGGGGAAGAACGCCAAGGGATTCTTCCCGTTCACTCTCCTCTACAACAACGAGTCTCGTCACCGCGTGCTCTCGGCATCCGGCCACATTGGCGCAAATTTGGCCAGCAGCAGCAGCACACCAATCATTGTTGAGGCGGCGGTGGAACAACAACAGCCGGGCATGAACACTCTCAGCAACGTGGTGCGTCACAACAGCAGCAGCAGCGGTGCCAATAATCAGCACATCCACGGACAAAACAGCACCGGCGTTGTGACGGCAGATGATGGACAAAGTGAGGGCGAGCCCGATGAGGCGGCGGCAGCGACCAATTTGACCAATGCCGGAGCGCGAGATGCGGATGTTGAGGAAGGCACGAGCGAAACGGCATGGCTGTCCACAACACGTCCACCCCCGTGTACACCGGTTGGGCGTCCGTGTCGTCGCCGCCGTCTTCGTTCTCGCTGCGTTTCTCCGGCTGCTGTGCCGCCCAGCCGTCGATCGTCACCACCACCGCAGCGTGCCTGCTCTATCACTGCTCAGCGCAGCCTGCACAGCATTGTGCAACGCATGAACGTCGTTGATGCGCAAGTCTCGCGCGATGAGCGCAACACGCGTATTCGTCAGCGAGCCCGCCGTCAGCAACTACAGCAGAACCACCAGCAGCAGCAGCTGAGTCGTCTTCGTCGGCACGTGCCGTCTTCATCTTCGTCATCTCCCACCCACCCGTTGTTGCGTCGTGGAGTCCCGAACGAGTTGCGCAGTGCCAGTGCCGTTGAAGCGGCAGATGTGATCACAATTGACGACACGGAGCCGCTCGGCGTTGAGCCGCAACAACAACTCCAACGTGGCGATGCCCGGTATTTCCAAGACGAATTGCTGACGCTGGAAGATGAAGTTGGAGCGGCGCACATCATCATGATTGGAAATGAGCCACTCTCGGTGGCAGACCGAGAGTGGCTCATATCTACCGGCTTTCAAATGCGGCACCTCCCATCGTCAGTGAAAGGCAGCGTGGAGGTGGACAACGACGGCAACAACAACATCAGCTGTTGTATTTGTTACAACTGGCTCGTCTCAGACGTGGACACCGTGGTTCGTCTCGCCTGCCAACATTTCTTGCATCGGAAGTGCTTCGCCCAGGAAGCGACTCAACGCAGTATTTGTCCTCTCTGCCGACGGCACTTCATTACGGGGGAAGCAACACAACAGAATGAGGTGTGGCCACAGATTGGGCGAGGACGACCACCCAGAACCACCACCACCACCAATGACAATGACACCGGAAGCAGCAGCGCTGCAGAAAGGGCAGACAACGACAATGACACGGCACAGATGGGCCGCTACTGCAAGGTGGTCAGTGTGTGGGAGCGCACCGAGTGTCGTAGTCGCAACACTCGGTGTGAGGCAGTTGAAGTGGCACTGAATGGATGGGCGGGTGCGCGGCGCCCGGACACGTTGCTGGCACAATGCATTGCGCATCTGCTGGACCGTGTGCTGGCCGGGCGCCCGCGCCCGCTGCGCATTGCCATGTCGTGCCAGCCGCCGCAGTTCGCCTCGCCCTACCACATCCCGCACCGCGCCCCGGAGCAGAACACCGCCGAAGCAATGGCCGCAGAATTGGAGCGGCTCGCCGCGCAGTCAGCCGGCGGCGTCGACCTGTTCGGCGGCACTGTTTTGTTCCGCATCAGCGCTGTGTGGCCACTGGAGCGCAATAGCGGTACAAAGGAAGGGGAGGGAAGGGTGACACTAAACGGCCAATACCGCGAGATCAGAGGCGTAAATGAAAGCAAATACTTCTTTTTTGAGTGTTTTAGGCGAGAAGGAGAGACGAAAAGCTTTTGGGGTTATTGGAAGGACAAAAGCAAAGACCCAATTCGCATTGACGAAATGCAATGCTTGGAATACGAAGAAGCCGGCATCATAAATCCGCCAGACAAAACAGTGATTGATTACCCATTGCGCTTCAAAAGTGCCAACACAAACGAATAA
>Hetgly06177.t1 gene=Hg185
GCAGTTAAATAAATTTAAAAAGAAAATGCTTTTTAAAATATTTATCACACTGGCACTGGCCCTGCTGATCAACTATGGCAGCGAAAAGTTGGCAGATGCTTCATGTTGTTGCTGCTGCCCATGCTGCTGTAAATGCTGCTGCTGCCCCCAACCGCCCATCATCATCCAACCCCCTCCAGCGCTTCACAAAATCTGTCAAGTGCCATGCTGCTGCTGCAAGCCGTGTTGTTGTTGCTGTGGCTGCGGTGGCGGTGGGCGAAAGCGGCGCTCAGTTGCGGCAGCGCTCAGTGGCATGTTGTCGCCACCAATCTCGGCACCATTGGCCACAACAGCTGCGCCCAGTACAGTTGCCGGCAACGGGACTATCGTAGCCGACTCACGTTGTGCAAGAAGCTGTCAGCCAACTACGGTAGCTGCTGCCACAAGTGGCCAACAACAAATGCCGTCCACGCTTCCCACACAATTGAGCAGAGGAGGAGGGCACAATTCATTGATTTAAAAGTGTGCCAATGATCATTCATTGTTGACACATACAGATACCCCCGTAGATGCAGTTACTTTAGTCATTAAAACTTTTATTCATTTTAGCACCACATAATTATGTTTCTCATACATCAGTTAGTTATTTTTTGTATTGTATAATTTATATGTAGTTAATTTAGCATCACTTTTTTTTATTTATCCCCCATATATTATTTATGTGTAGT
>Hetgly06178.t1 gene=Hg186
AGGCATTTTTGGATTTGACTGCGCACTGTGAGATGGAATTAAACAGCCAACCAATGGAGGAATTGGTTCAAAAGATGGGCGGCATTGGCATTGGCACTTTCAAAAATGCCATTTCAGTCGGACCCTTTTGTTCAGCCGGGCATAATGATGAGCCGGTCTGCTCAAATTTGCAGCCAAAATCGCGCGGCACATCCAAGCAATTTGCTGGTGCCTCAATGCTTGCAACGGTCGCGGAGGTCAAAAAATGGGTCCACGCGCTGTCCAACGAACTGTCAAAGCGTTTGGTGGCCGACGATGATAAGTATGGTCGCATTGCTCAAACATTGGTGGTCGGCTTCTCTGCCGGGCTAAGCGATCACAATGTCCGCACAATGCACTTGCCCAACTACACAACGGCGGACATCCAACAGGCATGCTGGAACTTCATGCGCCCATTCAATCGTGAGAAGGACGGCCATTCGTGGTACGGGTACAGGTATCCGCATGTCAGTTGCATTTACATGTCCGCGAGTCGTTTTGAACTTGTTGATCGCCGGCTGCCCACCAGACGCATCACCGAATTCTTCCACAAAAAAGCCTTGGGTGTTGAATGTGATGGCCAACAACAATGTTCAGGCAATGGCGATGATGAAGACGATGACGTTATCTTTTTGGCTGAAATGAATTTGCGAAAGGAATGCGACGGCGGTGGCAATGCCCAACGGCGGGAGGACGACAATGTTGAGCAGCAGCAGGAGACGGCGGCATGCAGCAACAACGTGGCGCAACAGCCCGCTAATGATGGCACCGACGGGGATGATGAAATTGTATTTTTGGGCAAACAGAAGGATGAACGTCACAATGGTCGGCGGCGGCGGCAATCGTTGACACGGCTCATTACGGAATTTTACCGCCCACGGCAGCAGAGGATGAGGACGATGATGATGATGGCCAAACCAATTTTGTGTGCAACCGGCAATAATGCCGTCGATCCTGCGGTTCCCGCGCCTGATCCTGCTCGGCCATTTGTTTTCCAGCTGCAACGGGGCAATGAGCTGTGCGGCGTGGCTTTTGCCAGCTTGCTCTGGCAACGCACCAAGGCATCGTCAACACCGCTGACGAGCGCGCCCCCTGCTCATGCGCCTGTGGACCCTGCTAGGCCATTCGTTTGCCACCTTCAACGGGGCAATCAGCGGTGCGGGGCCAATTTTGGCACCGAACATGCGCTTCAAACGCACGAAGGCATTGTGCACACCGCGGACGAGCGCGGTTCCCTGTTTCGTTGCCCCGTGCCTGGCTGTCTCTTTGGCACAAACAGCGAAAGGAATTGTGATCGTCATGTGCGAACAGTGCATGGCGGCTACTTCCCGCCGGTGATTTGTCTGCCGGGAGAGGCGCTGTGCATGTCGGCGGTGCAAGAAGGCCAACTTTTTGTTCGGGGCACATTTGTAATGGAGGCACAAGTGTCGCGCCGCACCAAAAACGTTGACCGGCTTACACTGCTGAGCAACTTTGACCAGGAAGCGACAACGGCAATCCAAAATGCTTGCGTCGCGGCCATCCGGGTTCTCCGAGCCCGGGAGCCGGAGAACTCGTTTTTCGACCATAATAAGGTCGTTATGCGAACACGACCGGGCGAGGGCTGCAAAATGGGCTCCTGTGGATTTGCCGCCTTTGCCGCATTTTTGTCGCTGGCGAGGGTCGTGCCGCTCCCGGAGAAGGCCATGAGCGGGGCCATCGACGGCGTCAGTTTGAGGGTGCGGGCAGTTGTGCACATCGGTCTCCCAAGCTGGCCGGGGTGTTGTCAGCTGGCTTTCACCAAGCGATCCTGCCAGCCGTCAACAGCAGGGATGTGTGCTATTGGATGATGAAGGTGTGCCACTGCCGGAAATTTATTATGTGAAAATTGTCATCAATTATGGGATCGTATTTCATTGAATGAAAAAAA
>Hetgly06180.t1 gene=Hg188
ATGGCCGAACTTCGGGGCATTCCACGCGACGTTTTGCTGCAACATTTTCACCCTAAAAATGTTGACTGGTTGACACGGTTGCTTGAAGGGCATAATGATGAGCCGGTCTGCTCAAATTTGCAGCCAAAATCGCTCGGCACATCCAAGCAATTTGCTGGTGCCTCAATGCTTGCAACGGTCGCGGAGGTCAAAAAATGGGTCCACGCGCTGTCCAACGAACTGTCAAAGCGTTTGGTGGCCGACGATGATAAGTATGGTCGCATTGCTCAAACATTGGTGGTCGGCTTCTCTGCCGGGCTAAGCGATCACAATGTCCGCACAATGCACTTGCCCAACTACACAACGGCGGACATCCAACAGGCATGCTGGAACTTCATGCGCCCATTCAATCGTGAGAAGGACGGCCATTCGTGGTACGGGTACAGGTATCCGCATGTCAGTTGCATTTACATGTCCGCGAGTCGTTTTGAACTTGTTGATCGCCGGCTGCCCACCAGACGCATCACCGAATTCTTCCACAAAAAAGCCTTGGGTGTTGAATGTGATGGCCAACAACAATGTTCAGGCAATGGCGATGATGAAGACGATGACGTTATCTTTTTGGCTGAAATGAATTTGCGAAAGGAATGCGACGGCGGTGGCAATGCCCAACGGCGGGAGGACGACAATGTTGAGCAGCAGCAGGAGACGGCGGCATGCAGCAACAACGTGGCGCAACAGCCCGCTAATGATGGCACCGACGGGGATGATGAAATTGTATTTTTGGGCAAACAGAAGGATGAACGTCACAATGGTCGGCGGCGGCGGCAATCGTTGACACGGCTCATTACGGAATTTTACCGCCCACGGCAGCAGAGGATGAGGACGATGATGATGATGGCCAAACCAATTTTGTGTGCAACCGGCAATAATGCCGTCGATCCCCCTGCTCATGCGCCTTCTGATCCTGCTCGGCCATTTGTTTGCCAGCTGCAACGGGGCAATCAGCTGTGCAGGGCCAATTTTGGAAGCCAACGTGCGCTGGCAACGCACGAAGGCATCGTCCACACCGCTGACGAGCGCGGTTCGCCCTTTCGTTGCCCCCCCCTGCTCATGCGCCTTCTGATCCTGCTCGGTCATTTGTTTGCCAGCTTCAACGCGGCAATCAGCTGTGCAGGGCCAATTTTGAAAGCCAACATGCGCTTCAAACGCACGAAGGCATTGTGCACACCGCGGACGAGCGCGGTTCCCCGTTCCGTTGCCCCAGTACATGGCGGCTTCTCCCCGCCGGTGATTTGCCTGCCTGGAGAGGCGCTCGTCATGTCGGCGCTGGAAGAGGGCCAACATTTTGTTGGGGAAACACTCGTGATCCAGGCACGAGTGCAGCGCCGCACCAAAAATGTTGACCGACTTACACTTGTCGGCCAATATGACGAGTACGCGACACTGGCACTTCGAAACGCCTATGTCGCGGCCATTCGGTTTCTCCGAGCCCGGGAGCCAAACAATCCTTTTTTCGACCATAATGTCAGCTGGCTTCACCCAAGCCATACTGCCGAGGGTCAACAGCGGTGA
>Hetgly06181.t1 gene=Hetgly06181
ATGTTCACACTGGAGACCGCCAAATGGAGTGGGCCGGCGTCCATTGAAATGTTGCTGGAGGACGGCGCGGGACAAGCGCAACGTGTCCAACAACAACACCAAATGTCAAGCACCAGCGGAGCAGCTGTGCCAACGGTTCAACAGCAGCAACAGTCGGCTGGCACCAAGGCCACCAAGAACATGGCGACGACAGCCGGCAGCACCAGCAAGAGTGCCGCCGCCGCCTCAACGGCAGGGGATGGCCGGTGGTTCGTCTACCACCAGCAGCAGAGTGCGGCTGTCGTGGGTAGTGTTGGTGGCACAACGCCAACAAAAACGGTGCTCACTAAGCAGCATCGTGCCACCGAAAGTCCGGCACGTAAACATGGCATGGCAACCATTGGTGGCACCGGCAAGGGTCTGAAGCTGAATGTTGTGCTGGAAAAGTTGAATGCGGCGTCAAGTTCAACAGTACAGCTCCACCAGCCACCACCAGCAGCAGTGTTGCGACGACGCCCACAACAACAACCGCTACAGTACCTCTACCACCAACAACAACGACCGATACAGTACCTCTATCGTCACCATCATCTTCAATACAGTTGTTGA
>Hetgly06182.t1 gene=Hetgly06182
ATGCAATCAAGAGCGTGTGGACCAATCAGTGCCAAGGCGGCGGAGATGCTGATGAATCGGCTCCATCTGATGCGCAAAGTTCATGCCATCATCACAATGGGTATCCAAAACATTCGCGGAATGCTCAAAATGGTGGCGCTGGATATTATGCCAAAAGGATGGACTGAAGCGCATGACGAACACTTGCTCATTGTTGTCGACAAATTTGGCCTTGAGGACATTCATGGAAAAGTCAAACTGTTGCTCAAACTTTTTGAATCGGTACAGTTTTAA
>Hetgly06179.t1 gene=Hg190
ATGATGGATTGTTTAAATGCATTAACTTTTGAACCCCCTGCTCATGCGCCTTCTGATCCTGCTCGGCCATTTGTTTGCCAGCTGCAACGGGGCAATCAGCTGTGCAGGGCCAATTTTGGAAGCCAACGTGCGCTGGCAACGCACGAAGGCATCGTCCACACCGCTGACGAGCGCGGTTCGCCCTTTCGTTGCCCCCCCCTGCTCATGCGCCTTCTGATCCTGCTCGGTCATTTGTTTGCCAGCTTCAACGCGGCAATCAGCTGTGCAGGGCCAATTTTGAAAGCCAACATGCGCTTCAAACGCACGAAGGCATTGTGCACACCGCGGACGAGCGCGGTTCCCCGTTCCGTTGCCCCGTCATGTGCAAGCAGTACATGGCGGCTTCTCCCCGCCGGTGATTTGCCTGCCTGGAGAGGCGCTCGTCATGTCGGCGCTGGAAGAGGGCCAACATTTTGTTGGGGAAACACTCGTGATCCAGGCACGAGTGCAGCGCCGCACCAAAAAATGTTGACCGACTTACACTTGTCGGCCAATATGACGAGTACGCGACACTGGCACTTCGAAACGCCTATGTCGCGGCCATTCGGTTTCTCCGAGCCCGGGAGCCAAACAATCCTTTTTTCGACCATAATGTCAGCTGGCTTCACCCAAGCCATACTGCCGAGGGTCAACAGCGTGATGTGA
>Hetgly06183.t1 gene=Hetgly06183
ATGCTTTTTAAAATATTTATCACACTGGCACTGGCCCTGCTGATCAACTATGGCAGCGAAAAGTTGGCAGATGCTTCATGTTGTTGCTGCTGCCCATGCTGCTGTAAATGCTGCTGCTGCCCCCAACCGCCCATCATCATCCAACCCCCTCCAGCGCTTCACAAAATCTGTCAAGTGCCATGCTGCTGCTGCAAGCCGTGCTGTTGTTGCTGTGGCTGCGGTGGCGGTGGGCGAAAGCGACGCTCAGTTGCTGCAGCGCTCAGTGGCATTTTGTCGCCACCAATCTCGGCACCATCGGCAACAACAGCTGCGCCCAGTACAGTAGCCGGCAACGGGACTATCGTAGCCGACTCACGTTGTGCAAGAAGCTGTCAGCCAACTACGGTAGCTGCTGCCACAACGCAACGTGTCCAACAACAACACCAAATGTCAAGCACCAGCGGAGCAGCTGTGCCAACGGTTCAACAGCAGCAACAGTCGGCTGGCACCAAGGCCGGACTCTGA
>Hetgly06184.t1 gene=Hetgly06184
ATGGCGAGAGTTGGCGAGAGGCGAGAGACGAGAGGCGAGAGTTGTCCCACCCCTGCTGCGCATGTAGCCTACATCTGGCTGCACAAAAACAATGGGGACTGGTTTTACGATGTCGGTTCAGTGACGGAGGGCACAACAACGTATTATGAGGGCATTAATTGCACGATCGAGCAATTTCAATGCCGGTTGGAGCGGAAGCTGGCCGGCGTGGCTGCCGATACGACGCAGGAATGGGAAGAATTTGAAGGAGAACAGGGTGAAGAGGGACATGATGATGAGGGTGAGGAAAAGGCGGAAGATGATGATGAGTAG
>Hg192.1 gene=Hg192
TTTTTTTTTTTTTTTTGCTAATTGCTGTCCACCGGTTCCCGCACAGACATCAACGAGTGTGCCGAGTTCGGCTACTGTGATCAAACGTGCCAAAACCATCGTCCGTCATTCACCTGTGGCTGTTTGGGCTCCTGTTTTCGGCTCCAAATGGTCCAAAGCATTTCGTCCGGGCCCGGCACCGGTGGCCACTCCAACATGTCACTGCGCGGCTACTGTGTGTCCAATGAGGCGGAAAAAATGCGACTGTTTGTGGCACGGCGTGAGGGACTGTACCGGGTGAACCCGGCCAACAAAGATGAACAGGCGGTGAAAATTGCGTCCGGCGAGTTCATCTATGGCGTCGATTTTGACTATGAGCAGAAGAAAATGTTCTGGACAGATCGCATGGCACATTCACTGTTCCGTGCCGACATCACACCGACGGGAGACATTGAAAAGATTAAAAAATTGGACTTAAAATCGTGAGCATTAAAA
>Hetgly06185.t1 gene=Hetgly06185
ATGATAAAATTTAGTGACGAAGAAAGTTGTGCACCACGTGAAGGCCATTGTGCACAAGACCAGTTCAAGTGCCATACATCGGGCATTTGTATACCAGGCACATGGAAATGTGATGGCCAATTGGACTGTGACGATGGAAGTGATGAGCCCCGAGCGACCTGTGAGGAGATGCACAGCACATGCCCCGCTGGTCATTTCCGGTGCAACAATGGACGGTGCATTTTCTCGACATGGATTTGTGATGGTGAAAATGATTGTGGTGACAATTCTGATGAACAAAACAATTGCCCGAACAGTGCAGCAACATTCAAATGTCCATTTGAAACAATTTCTTGCAAAAGTGCCCCGGAGCAATGCATTCCATTCCATCAGCTTTGTGATGGAAAACAACATTGCATTGATGGGTCGGATGAAGGTGGTCGATGCTCACGCGATTTGTGTGTGGCTGATCGTGCCGGGTGCCAATACAAATGCCACAATTCACCCGAAGGACCAATCTGTTCATGTCCGTTGGGCGAACAGCTGATCAACAAGACAAAATGTGAGCCAGAAAATGAGTGCCTTGACCCAAGAACATGGTATGTAATTTTGCAAAAATATTACACACCGTATGCCAATAATAATACTACCGTATTGTGTACAGTTCTCAACACTGTACGGACGAGAAGCACGGTTTCCGGTGCAGTTGTGATCCGGCATATGAGCTTGAGCCGGACAAGCGGACCTGCAAGGTGA
>Hetgly06186.t1 gene=Hetgly06186
ATGGTGGCCGCCAACAACAAGGTGATGCAGTTGAATTTGGTCGGCGCCCGGGGCCGCGTCAACGCCGCTGCGGAGTCCGCGGACGTACAGGCGGACATTGCCGCTGTGGAGTTCGACCCGCGTCGGGAACAGATGTTTTGGATTGATGCCTACCAAAAGAAGGTGTTCCGTTCGGCATTGCCAAAGGGCAATCAGTCGCACGAAGGCCAGGAACTGCAAATTCATTTTGATGACAATGTGACGCCGTTGATTGTGGCTGAAAGTGACACAAGTTTTGACGCAACAAATTCTTCAATCATTGACACCACCAAAGGCACGGCGGTGGACGATGGCATTAGCATAACAGCTCCACAGGAGGTCCAAAACAGTTGCGGAACGGTGGAAAACGACGGCACCGTCGTCGCTGGAACGGAGCGTGACACCGGGTGTGACCGTGTGTTGCGGAGTGCAACCAAGGCAGCACTGATGAAAGCGCAGCAGGCACAACAATGTCGTCAGATGGGCAAAAGGACGGGTGGCGCACCCCGTGGACCAAAAATTGTGCCAAATGCATGCGCGTCACCCGAGCGGAAAAAACGCCAAACCAAACACTACAATAAACTAAATCGACCCAAAATCACTGTATCCTGCAGCGCCCCGAATGTGCCGCCGATCATTCGCTCTCTTGAAGGGGAGCGCAGCTACCGCGTGAAGGCTGTTTTGGCGACCTACACCCATAGCAACAATAGGATCGGATATTACGTAGACTGGCTTCGTGCGAGGGGCCAAGAGAGTTGGGTGCAGAAGTGTGATTGCCTAGAAATGGCCATTGACTTCACAAAGAAGGCGAATGTCCACGATGTGTTGCGTGGACTACTTGGCGAGCCAATTCCCGAGAGTATTGCCAAGGAAATCGTGTTTGACAACTTCAAATTCCGACTGCAATTGTCACATTGCCAAAACTTGGCCGAATTTGTTACAGCGATGCCGGGCTGGAAGCAAAAATTGAGTGTGCCGACATGGACGCAAAGGTATGCCCGTGACATGTTGCAGGCCGAAAGTGCATGTGCCCGCGCACAATGCACCCATTTGTGTGCTGAATTGCCGGCCAGCGGTTTCCGTTGCATGTGCCCGGACAATGTGACACAATTTGATGACGGCTCATGTGGCACCGTTCGAATTGAGGAGTTGCCGCCACCCAAGCAATGTTCGTGCCAAAATGGTGGCATTTGCACCGCCGCCGGCACATGCAAATGCGGTGACTTTGAGGGCGAATTTTGCCAAAAGCAATCGTCAGTGACTCGTCAACTTATTGGACGACTTGGCAACGGTGCCTACTACGCGTTGCTGTTGATGTTCTCCATGCTGGTGTGCCTGGGCATGCTCACCGTCATTGTGCTGTTGATGTACAAAAAGAAAATTCTGTTGGACAAGAAGCGGCAGGCAGCTGGGGACGGCACATCATCGCTGGGCGCCTCCGTGGTGTCCTTCCATGGCAATGTGATCTCGTTCAGCAACCCGGACATTAAGTTTTTATGA
>Hetgly06187.t1 gene=Hetgly06187
ATGGTTCTTGTAAGCGCATTTTGCGCTCAGCTGCTCAACTGCCCTGTCAAATCATTGCGCGACCGGCTCAACCACCCAGAGGATCGGGCGCTTGTGCTTAAACACATCATTGGGCGCAAAGCACGCACCACATACAACGACCGTAATGGGTTGACCAAAACTTTCTTCGTCACTGGAATTTCGGCACAAGGCGCCGCATTTCTTCCTGCATATGGGCAATTGCGCAACCCATTCAACATCAATGTGGCGGCGCATTTTTATGCACGACACCGCATAAAGCTTCACTTCCCGTATGCACCGTGCATAATTGAACGCTTTTCGGGGGAGGGGAGGATCGGCACTACCCCAATGGAACTTCTTGAGCTGATTGATGACAACATGGACATGGACATCAACAACAATGAGCATTGGCTGGGCCGTCTTTTCACTGAAATTGACGACAAACAATCGTCGTCAAACTCATCCGACACAACAATGCGCCTAGTATTTGAGGGAGACATGGATGAAGACAGCGTACGCAATGAATGCTCACAGAGTACTGTACCGTTATATTAG
>Hetgly06188.t1 gene=Hetgly06188
ATCTCTCTATGGACCACCTCAGCAGCGCGCCTCGTTCTGCTCAAGGCAATACAGAAGGTGGTCAGATCACCGGGCTCGGATCTGTTGGACACTGACACTGACAGCCTCATCCTCGTCCACCCGGAGGAGCGGTGCCCGCTGAAAACTGGTACCCACTTGGGTCAGTTCACCGACGAATACCCCGACCACGACATTGTGGAATTTTGCAGTGGCGGGGCAAAACAATACGGTCGTTGTCTGCGACGAAAGGGCACTGAAGAGGGAGCCCAATTGGAACATGTGCTCAAAGTGCGCGGGCTGACGCTAAATTATGATGTGATCAACAATCAAGGGATGCGCTATTTCAAAGAGGAGGTGGTCCGGTACGCGACAAGTAGTGAATACGAGCCGATAACCATCACATACCCCAACTTCCTTCGTCCAAACATCAGGGAGGGAGGTCGGGTGGTTTCCGTGCCTTTGCAAAAGTGCTATCAAATTGTGTACATTTTATGCCATTTTATTAGTTTTTAA
>Hetgly06188.t2 gene=Hetgly06188
CTGTTGGACACTGGTAAGTCAAACTACAAAAAAAAATTTTGTGCACAAACATTTATTTTAGACACTGACAGCCTCATCCTCGTCCACCCGGAGGAGCGGTGCCCGCTGAAAACTGGTACCCACTTGGGTCAGTTCACCGACGAATACCCCGACCACGACATTGTGGAATTTTGCAGTGGCGGGGCAAAACAATACGGTCGTTGTCTGCGACGAAAGGGCACTGAAGAGGGAGCCCAATTGGAACATGTGCTCAAAGTGCGCGGGCTGACGCTAAATTATGATGTGATCAACAATCAAGGGATGCGCTATTTCAAAGAGGAGGTGGTCCGGTACGCGACAAGTAGTGAATACGAGCCGATAACCATCACATACCCCAACTTCCTTCGTCCAAACATCAGGGAGGGAGGTCGGGTGGTTTCCGTGCCTTTGCAAAAGTGCTATCAAATTGTGTACATTTTATGCCATTTTATTAGTTTTTAA
>Hetgly06189.t1 gene=Hetgly06189
GCGTGCCGCCGCGCGCGGGTTTACCGCACGAACGCGTGCCTGTGGCACGGGTTCGTGCGGGAGGGAGTGGTGCGTGCGAGAGTGAGGGGGAGGCGGCGCGCGGTTTTACCGCGCGTGTGGCACACGGGTCTGAGAGTTCAAAAAAATTTTTACTCAAAATGTCCGGCAATTTGGTTGTGGCTGAAAGTGACACAAGTTTTGACGCAACAAATTCTTCAATCATTGACACCACCAAAGGCACGGCGGTGGACGATGGCATTGGCATAACAGCTCCACAGGAGGTCCAAAACAGTGGCGGAACGGTGGAAAACGACGGCACCGTCGTCGGTGGAACGGAGCGTGACACCGGGTGTGACCGTGTGTTGCGGAGTGCAACCAAGGCAGCACTGATGAAAGCGCAGCAGGCACAACAATGTCGTCAGATGGGCAAAAGGACGGGTGGCGCACCCCGTGGACCAAAAATTGTGCCAAATGCATGCGCGTCACCCGAGCGGAAAAAACGCCAAACCAAACACTACAATAAACTAAATCGACCCAAAATCACTGTATCCTGCAGCGCCCCGAATGTGCAGCCGATCATTCGCTCTCTTGAAGGGGAGCGCAGCTACCGCGTGAAGGCTGTTTTGGCGACCTACACCCATAGCAACAATAGGATCGGATATTACGTAGACTGGCTTCGTGCGAGGGGCCAAGAGAGTTGGGTGCAGAAGTGTGATTGCCTAGAAATGGCCATTGACTTCACAAAGAAGGCGAATGTCCACGATGTGTTGCGTGGACTACTTGGCGAGCCAATTCCCGAGAGTATTGCCAAGGAAGTGATGGCGATTTGTAATTTGTTGGGCCGGGACCCCGCAACAGTGCTAAAAATTGACGACCTGAACATTTCATTTGCTCCATCACTCAATGTCCAGGACATTCCGTACAAAAAAGCCATTGCACAGTTGGGCGAATTTTTGAAAAATTGTTTGGAAGCGCCGGCACCCGAGGAAAGCGACAGTGAAGACGAATGA
>Hetgly06190.t1 gene=Hetgly06190
ATGATTAAGGTCCAAAACAGTGCGGAACGGTGGAAAACGACGGCACCGTCGTCGGGAACGGAGCGTGACACCGGGTGTGACCGTGTGTTGCGGAGTGCAACCAAGGCAGCACTGATGAAAGCGCAGCAGGCACAACAATGTCGTCAGATGGGCAAAAGGACGGGTGGCGCACCCCGTGGACCAAAAATTGTGCCAAATGCATGCGCGTCACCCGAGCGGAAAAAACGCCAAACCAAACACTACAATAAACTAAATCGACCCAAAATCACTGTATCCTGCAGCGCCCCGAATGTGCAGCCGATCATTCGCTCTCTTGAAGGGGAGCGCAGCTACCGCGTGAAGGCTGTTTTGGCGACCTACACCCATAGCAACAATAGGATCGGATATTACGTAGACTGGCTTCGTAAGTGGTTGGGATGA
>Hetgly06191.t1 gene=Hetgly06191
ATGAGTCGACACAGGAAGGTGGGCCAACAGAGCAAATTACAGGGCTCGCCCATTCGGAACGAAAATGGACACAAAAATGCACATCAAAGAGGGACGGTAGACGATCACATTGCGATCACATTGGCAATCATCATCCAATCAACGACGACCAATTCGAAACATATTCCGACAATTCCATCAAAAACGGCCGACACGCGGAGAAGACCGAATTCTTTAGAGGAAGAAGGACTAAACGAAGGACAAACCGAAAGGGATAAAAGGCTTTGGCTCATCCATCAAAAAAGGCAGTTGCGTAATATGGATTTAGACGCCCTGCGGCGTCGAATTGTGACTCTCGAGCAAGAGATGCGTGAAAATGTTCTCCCGCTGTTCCTCAGAGGATCGGCAAGGGCAATTTACGAGAACATCGAACCGGATATTAAAGATAATTGGCGAAGTCTAATTGATGCCATGGCGGATAAGTTGAAACAAATGTCTCCAAGTCTGACAGCAACACAGAAATTGGCACAACGGAAACAACTGACTGGAGAATCGCTGGAAGAATTCGCGCAAGCGATTCGGAACCTCGTCTTACGTGCTTATCCCGACAATTCTCTCGAGATGGACTTTGGAATTTGGTGCTCGGTGCTTTGGAAAATGATGTGAAACAAGCAAACGAAGTCCGACTTCGACAATTCCGTTCGGAAATTGCGCGAGATTTTTTTCGAGCAAATATGGCACCACGACTGAAGGAAAGAGTGATGTACATGGAAGAACCGCAAACGATCGAGGAAGCAGTGGCCCAGGCAAGACGTGTTGAACAAGTCCAAGGAAATTTGGCCGATGACATGTGGAAAAATACACAAGATGCAAAGGCAGAAGTTGCTTTAGCGGAAGTTAATGCAGTGCGAACCGAATTAAATGAGATTCGTGAACAACAACAAAGGAGCCGAGAGAATCCAGGACGAGATCAACGAGAATGGCAAAATCAAAGCAATTCTTGGAGAGGAAACAACGCCGAAGGACAAAATCAATCTAATTTTTGGAGGGGCAATCCCGAATTTCGGCCAATTCGCCGAGGGAATTTCACGCTAAGGGGATTCACAGGATACCCCAGGGGACTCAACACATACCGAGGAGGATTTAATCCGCGCGGCGCTAACGCTAACTTCACACCGCTTGGCAACAACTTCCAAGGAACAAACAACAATGGCAATTTTCAACCGAACTTCAACCAAAACCAAAATTGGCCAAGAGGACGTGGACCAACAGGTCCCAACAGAGGACGCGGAGGAAGTGATGCCAATCGAGGACGGACTGGCTGGCGCGTGAACGAAGTGAATTTTCCATTTATTTGTCTGATGACCATCATGGCGGCGATGTTCTTACCCGCTGACGGACAATACAAATTATGCCCGTCCAAGCCGACAGAAGGGATTACTGTTACTATGAGCTTTCCGGAGGAACAAAATTGCACTCTTCCGGTGGAAAAGCCTCCACTGACGGTGAAGTCAAATCTTTACATACCAATTCGGATTCCGCGAGTGTTTCCCGCATTTAAATGCTGGAATGTGACAACAGTCACATGTACCGAGTCTTTTCTTCGAATCATGACTCTGGATCATCCTGACAAGAAAATTGAAGCCGAAGCTTCAGTAGAGGACTGTCAGGCCTCAATACACCATTCGCCGATGAACAGAGTGAGCGAGACAAGATGGGAAAGTTTGGCGCCAATTCGAAAAGAGTACGGATGGTACGGCGTGAATTGTTTCAACAATGTACAGACAGTGATTGAAGAAGGAAAAGCAGGGATTTTGGATGGGAAAAGACTGATAACTTCGTGGGGAGACTCTTTAAAAATTGATAAAAGCCTGGGGGAAGACGGCAGCTGGATCAGACTGCCAGGAGCTGTGGAATTGCTCATGTGGAAAATTCCATCAGATGAATTTTGGCATTCACATTTTGTGATTGGCCCAGTAATCACGGAAATTTGGCCAAAAAAGGCAGTGATCGTGGACGAGCTCCAATACACTTTTCCAATAAGCCGAAATCAGGAAAGAAAATTTCCTGTGTTTGGAGTGCCTGAAGATGCGCTAAAAACGGACAACAATGTTTTTGTGCATGTCATTGGTAAAGTAAACTCAACCAAGGGAGCGCGTCAAAGACGAGAGACCGCGAGTCTAAAACCTGGACAAAGAAAGCCAAATGTGCCGAGAATTGAACCAACAAGAAGGCCGAATTTGCGAAGAGGTCAAATTGCTGAAATCGCCATGACAACCCGCCCAACTATTACTACCACTAATAGTCCACCGACAATTAGTCCAGTTTCTACAACGCATATTCCATCGACAATTCCCACAATCGCCACTCATACTCCACCGACAACCCGCCCAATCACAACGACACATATTCCTCCGACGATCCGCCCAATCACAACGACACATATTCCTCCGACGATTCGCCCAATCACAACGACACATATTCCTCCGACGATTCGCCCAATTACTACGACTAATATTCCTCCGACGATTCGCCCAATTACTACGACTA
>Hetgly06192.t1 gene=Hg198
GAAAACCGTGAAGGCGAAGTCCATCCGATTTGTTACTTCAGCCGAGTGCTAACAAAACATGAAAAGCGCTATTCGGTGGTCGAATTAGAAGCCTTAGCAATTTGTGCTTCCCTCAAGAATTTTCGACCATATTTGGAAGGAGCTGGAAAATCAACAGTGATCACGGACAATTCGGCTTTGACATCATTATTCCGGCGGAAGGACTTGGAAGGGCGACTCAGTCGATACCAATTGGCTATCATGGCATTCGATGTTGAAATCATTCATCGCCCTGGAAAGCGGAACCAATTTTGTGACCATCTTTCACGATACTTGGACGACAACGACACACAAATTAATTGGCTGAAAATTGAACCAAAAATTTCACAAAGTGAAATGCGCGAGGCTCAAAAACAAGAGACGGACACACAAAAGAGACGGGAAACTTTGAGGAAGGATCAAAATTCAGAGGAACCAAATGAATTCTCTGGAAAATGGAAACTTACGGAAGATCTTTTGTGTGCAATGGACCGAGGCGAATGGAAAATTTATGTGCCTAATAGTCTGAGGCAAAGAGTGATGAAGGAATACCACTCTGACCCTTTCCAAGTCACCACGACTGGCGGAAAAGATTGGGCTGCCGCGCTTCCGATGCTTTGCTTTGCATATAATACTTCGATTAACTCACAAATAAATCATTCGCCATTCTTTGTGCTTCATGGATTTGATCCACGGCTTCCCAGTGAGATGCTACTCGAAAAAGACGGCGAAGAGTACAATGACATGGCCATATACGTCCAAGAGCTGACCAAAAGGATGGAAGAAGCAAAATCTCGGATCAGAGAAAGTCTGAAGAAGTGTGCTAATCGGATGATCCAGCAACAAAAGGGCACGAAAGAAGTCCGATGGACGGAAGGAATGCTTGTTTTGAGACGCAGAAATGACAAAAAGAATAAATTGGAACCAAATTATGAAGGGCCATTTCGCGTCATCAAAATCGAGAAGCCAAATTTGCAAATTCGGGAACTCGACCCCGATGGACAGCCATTTACAGTGCACATGGACCAATGCAAGCCGTATTTCACAGATGAGAAAGCAAGACAGGACACAGAATTTTATTTTGAACAATTTACTGATCAACAACACCAAGTTTTTGTCCAGTCCATAACTCCAGAAGTTTGGATTACCCTGCATGACACCCCCTTGGAGCAGACAACAATCCATTTCGACCCCTTGGAAATGACCAACAAATTCACAAAATTTCAAAAACATTCATTTCACGTTGACTCATTTCACCATAATTCGTTGGATTGCTTACAGCCAATAATGTCACGTTTTGACAAAACTTATTCGTTTTCAAATTGTTCTACTCGCCGAAACTCATCACCAATACCACCCGCCATTACCATTTCTTCATCGGATTCAGAGGATGAAGCCGAACAACAACAACAACACAATCGTTCAAGCGAGGGACCGGAACCGCGACCATATGCACCCATACTCACTTCATTCCCGGCCGAACAAGTCGAAATAATTTGACTCGACCAAGTGGCCAACTTCAAAAAACAGCACCGACTGGCGGAAATTGAACGTCAAATTCAGTTGATGCAGCAGGCCAAGGCACAAATTGAAAATGAAGAGGAAGATGAGAAGCAAATCCAGGCGTTGAGGAAGCAATCAGAGAAGACAAAAAAAGAAAGGAAGCAAAAGGAAAGTGAGGAAAGGCAGGCCAAATCGGAGGCCAGAAGAGTGGAAGCGGAAATGAAGGCAAAAGAAGAAGCGAAGAAACAAAAAGAAGAATGGAAACGGGCACTCCGACGTCTGGCAGCCACGCCGGAAGAAAAAGCGAGGAAAGAAGCGGAAAATGAAATAAGGAAAGAAGCAGAAACGGAAGCGAGGAAGGAATTGGAAGAGGAAGCGCGGAAGGAAGCGGAAAAGAAGGCGCAGAAGGAAGCGGAAGAAGCGAAAGAAAAATCACAGAAAGAAGCGGAAGAAGCGAAAGAAAAGACGCAAAAGGAAGCCGAAGAAGCAAAAGCGCAGAAGGAAAGGGAGGAGAAAGTCAAAAGAGAGGAGGAAGAAAAGCGAAAGAAAGAAAAGGAAGCGAAGACAAAACCGAAAAAGAAGGCAGAAAGAGAAGAAAATGACACAATAATCGCCAGGGGAATAAAGAAAAGGCGCTTAACAGAAGCAGAAAAGGAAGAGCGAAGCCAGAAGGATGCCGAGGAAAAAGCGCGCCGAGAGATCACGGATATTGTAAAAGAAGTCGAAGAGGAGGCCAAGCAAAGGCAAATCCGAAACAAAATTGAGGAATTGACGGCAAAACTGGCAGGGAAACCCAGAGAAGAAATGGGAGAAGAAGAGGCAAAGGAGTTGGGAAAGGAGAAGGAGCGCTTTGAGAACCCCCCGGAGCCGCCAAGAGAGCGCAGGCCTTTCTATTCCAGCGCCGTGGCGCGCTTTGAGTGCCAAAGCGAATTGGACTCAGCGTCGAAACTAAGAGGAAGAGAAGAAAGAGGGGACAGAGAAAGGAACTTGGGAATGAGCGGGAAGCGCTTGTTCACAAACATGCTCAAATCGGCCGTCGGGACAGTAAATGACCGTCCCTGTATTCCACCCGAGGGATTAAATCGCGAAATGCTCAAAAGAAGACCGACTCCAGCGCCAGTGCCGCAGTTTACGACACGCAGCGCGGAGAGGAGCCCCGTGAGGAAGACATACGCGCCGTTTCGGAAAGGGATGCCACTGGAACGCGCGGAGGAAGCTATCTACAAAATCCGCAAGTCACTGCTCCGGGCCGCGGACGCGCTTTCAGAGCTCGCCGACGAACTGTTCCCGCACGGAGAAGCGCGAGAGAAAGATGAAGGAAAGGAGGACGAAGAGGCGCAAACTTCCGCACAACCGCCCATCAAAATGCCGAGTGTCAATGCCAATTTGGCGCCGGCATTGCGTGCCAACAACAATCAAATGATCACACATGCCATGCCCACGAATTGGTCAAATCATTTGCCTGATACCCAACAAAATGTCGGGCTCCATCTTTCAAACAATTTCCAACGACAACAACAACAAAATTGCCAGAATCTTCAGCCCACGAATTTGTCAAATCATTTGCCTGGCATCCATCAAAATGTCGGGACTCATCTTTCAACCAATTTCCAACCACAACAACAACAAAATTGCCAGAATCTTGAGCAATCTCGCCAATTATCAGAACAAATGGTAGTCCCAGGACTTAGCGAAAATGGCACGACTTCGTTTGATTTTATGGTTAAATCGGTCTCCAATTTCAATCAGATTTTACCGCCAATACAATTATTCGTTTCCTCTTTGGATTTCCGTGAGGCTCAATTAACACCGAATGGTCCAATGCGTGTTTGTAATGCTATCCTAATCAACGGGGAGGGAAAGACCGTTGAGGTCTCAGCTTGGCGCTTACAAGCGGATGTGTTAGCATCAGCCATGAGAGGCTATTTGTACATTTTCGTAAACTGCCGTGCCAAACCACCGCAAGAACGGACCAATTGTTGGTTCAGACTGAACATTGATGCCATGAGTTCATACATGGTACAGGTCCAGCCACATATTGCAATGCCACAAAATACCATTGCTCCCGCTCAAAGCCAACAGTCCGGTTCAATTATGCCTAATGAACCGCCGAGATCACAAATTGTCAATTCCGGGCCAAATTTAGTGGTTATTCAAAGCCACCAAAATGAAAATTCCGTGCCTATCACGCAATCTGCCCCGTCTAATCCCTTAGCTCATGATCAAATTTTGGTGCCCAGTGGGGCGAACTCGCATCACACTGATGAGATAGTGGAGGTCGAACGCAACGAATCAGCGGGACAGGGAAATCGCCAACAGCAACTGAGACGTTCGAAGGTTGATCACGGACGTTTGCGACATGGCGGGGACGACCTGACTGAATCAGTGCGAAATCATCCCTACCGAAGACCTGCCAGGGCACAGGAGCCTGTTCTTGACGAGAGACCCAGCACGTCAGGGGGTACTGGGTTAACTCGTCCTGAGCGGCAGTCCCGCCAATCGGTGCGTCCTTCAGTTGAACCTACTTTGTCATCTATAGTGGAACCCCCGCCTCCTCCCGGCCCTTACCCGCTTAGTAAAATTAAGCGTTTACCCACTTGCCAAATTAACCAGTCGCATATTAACGAGGGTATTGAGTGCTCAATTTGTGGGGAACTTTTTGTTATGGATAGTATTGTCTCTGCTCTACAATGCACCCATCTTTATCATCTCAATTGTATTAAAAAATGGCTCAAAATATCTGGTGCTTGCCCATTATGTAAAATCGC
>Hetgly06193.t1 gene=Hetgly06193
ATGCGCAGCTCTCGTGTGAACAGATGCTGTGTGATCAACACAACGCTGACGCCCCAATTGTGGGAGCCACGGGTGAACAACAGATCAAGGAACGGGGCACGCATGCCGACCATCAGGTCATCCAACACCAATAGCAGTCTGCCGCCGCACGCTTTGGCTGCCCGCTTCACCGCCTCCTCATCGGGAAGCGCGTGGCAGGGGCGGACCCAGCGCCGCCGCGCTTCCGAGTTTTTGAATAATCATTCAATGGACATGTTCCGGTTCAAAGTTCATAACGCTGTCAAAGACACCGACGACGCCGCCACCGACTCTGCTGCACCACATGATCAATGTCAACAACGCCAACAGCGCGAGGCGCCTCCCCGCACAATGCCGTTGTCCTTGTTGGCTGAAGAGCAACCTCATGCGTCAGCAGCAGCTGAGGCTGCTGCCGAGGCAGCGAGTGTTGTTGACCAACAGATGTCGGTAGCGCCAAATGACACTCCCGCCATTGCTGGCACGAAAATTGATTTTATGACTGATGAACAAACAGTGGCGGCAGCGCCGCCGCCTCTATTCAGTGAGATTGAACCGACGCACCAGCAGCAGCAAAAACAACAACAGGGGGGTACAGCGGAAATCACCGCACCGAAAGTGGAGCTGTCCGCCGAGGACAATGGTGATGATGATGATGAGGCTGGACAACAGGTCAAACAAGAGGCGGACAGGAACAGCATGGATGCGCATCATTCAAATTGTGCAAAGGGGCCCCTTTTGTTCGTTGATGAACAGGAGAATGAGGAGGAGGATAGTGAGGAAGATGAGCACATTTCAACAACGCATCGAAGGCAAGGCATGGACTCGTCATTTGACTACGAAGACGACGATGATGATGATGACAATGACGATGATGATGATGATGATGATGAAATGGAATCAGTCAGCGGATGTGCGGAATCAGACAAATGTGGTCACTGTCACCACCCACATCAGCTACCACGAAATGCTTTGGAGGTGCTCAAAATGCCGCTCATTGACTACCTGTGTGCGCTGAACCATGGATGCAGCGTGGGAGAGCTGCAGGCCTTGTTCCTGTCTAAGGGCGCACATGGTCGCATGGTCACCCATCTGCAGAAGCGCTGCCTACTGCGCACTGTCCATTTGCGCCCCACCGAGCGCAACATCGCACTACATGCACACAATTTTAGTGCACGAAGCGCCAGTCTGACCTTTGCCTGCGGTGGGTATCTGAACCTAACGGTACGTCAATATTTTTTCGCAAAACATGGCGTTCGGCTGCGCCATCCAAGTCTGCCCACTCTGGTGGAATTTGGAGGTGGAATGCATGCTTCATACTACCCGCTTGAGTGCATCCAGGTGCACGTCGCGGTGACTGCACCGGAGGACGCTGCCAGCACCACCTCCACCGCCACTACCACCACCACCGCATCACCAACTGCGTGTCAATTAGTGATCGTAAACAGCACGGCTACGTTTGCTGTGTGGCGCTTAAACGGAAACAATCACTCACCGTCCCAGCAGCAACAGCAGTGCTTTTCCCTTGCACAGTTTTTGGCTTTGGCACGCAACGGGGTGTGCACCGAGTACGCACCCCACCGCTTCCACGCCATTGTTATGCGCATGCGTAGCGGGCCTAGGCAGCAAAGTAGCGCCACCACCGCGACCACCACCACCACCACCACCACCACTGCACTCATCTTTCGCAGTGGTCGCGTGGTGCTGACCGGCATTAGGGGTGTCCCGCCCAATCAAATCCACGCCCTCTGTGGCAAGCAAGCCAAAAGGGTTTGCCGACGAGTTGGTGCGGCACTCAAATGGGGCGGATTTCCCGCACTGGCGCTCTCACTGAGCGTCAACGGGGTGGAGATGCGCAATCTGGTCACCACCCTGCACTTGCCCTACCGACTGAACATTGAACAGATGGCACAACACTTGTCATCTCTTGGCCAAAACGGTGAGAGACGGGTAGGGGGAGGGGAGGGAGCGAAAGCAAGACTTTGGCTGTTCAGATGTGAAACGGGTGTGCCTCGACTTGTGCACCTTCCCCGGCCTTCGCTGTACACTGGTGATACGCAGGCATTCAAATGGGAAAACACACTGGCAACATGTCTCTTCTTCATCACCGGCACTGTTATTGTGACTGTTGTGCGACAACCGGAAGAACTGGAGCAAGCAGTTGCGTCAGTTCGAGCACTATGTCAAGAGCATCAAAGAAAATCATAA
>Hetgly06194.t1 gene=Hetgly06194
ATGGCACACCTCGAGGATGGAGAATTTGTGTCAAGCGATTCATCTGAGGGGGCAGCAGAAGGGGCCCCTCAGCACATAAATTTTTTGGAAATTGTTTCAAAACGCCATGGCCAGGAAGGAAAAGCGCTTTTAACACACAATGGCTTTGAATATGCGTTCGATAAAACCTCGAAATCAAATGATATGCACGAATTTTGGCGCTGCAAAATAAAGTGTCCATATTGCCCGGCCAGAATCACTGTTTCACGCATTTGGCAACAAAATGAACAGGGGAAACGCTTCAAAATGGGGCATTATAATAATGAAAATCATAATCACCCGCCAAGAACAGGGAATATTATGGTACGAAATGCTGAAGACAGATTGAGGCAGGAAGCAAGGCAGGCCAATCCGATGAGAACGAGGGATATTGTTGCTGAAGTGAGATCTTCAATCCCTGTTGGTGTACGGGTGGCCGTCGAATCTGGCACTCCATCATCTTCTGCAATGGTTCGTGCCTTTAACTGGCACAAAAGCAATGCCCGACGGCTTCAAGGAGATGAAGGACTCGATTTGGATGATCCGCGTGCTGTACAAATACCAGCTTATCTTCAAGAATTTGGGCTTATTTTCAATGAAAACATCGGTGGACAAAAAATGTTGGTGATTATGTCAAACTTTGGAGAGACAATGCTGAGAAATGCCAATGAGGTGTCAATTGATGGCACATTTGACAAAGTCCCGAGGGGATTTAACCAATTATATACGCTTGCAGTTATAATTGATCGGAATTTGCGACAACAAACGAATATGCGACGAATTTGGGACATTGGCATTGAACAATGCAATGCAAATGAAAGAGATGAAAAATTGCGTTTAAAGTCATTCAAAGCAATTCCTTTTGTGCCAATTGAATCGGTTTACAGTTACTTTTGTGTTTTAGTAGCCAGCTTCCAGCCTAATGACGAAATTTTTGAATTTATGCAATATTATGTACGGACATGGTTTGGTGGTGATTTTATAATGGCACAACCACCAATTCAACTGCACCAAAACCCTGAGATTAACAACGGACGCGGTGTTGACCAATGGATTAGGGGATGGATTAACAATGCCGGTCTTGCGCATCGCCGTGCTTTATTTGCTCCTAGATTGTGGAATGTTTCTGATCGGCTCCAAAATAACATAAGCAGGACAAATAACAGCATAGAGGCTTGGCATTTGCAGTGGAATTCGAAATTTCGAGAAGATTCGCCTCGTTTAAGCAGAGTGATCAGAGCAATTATTGATGAAAATAATATTTTTCATAATATGGTTGATGAATATATGGCTGCGCCTATACAGGGGATAAGGGGCCGTGGTTTGGATCGCCGAGCAGCGAACATTCAGCAAGACGAAAATTTGTTGGCTATCTTCAATACACGACTTGAACGTGAGCCGCTCGATTATTTGCGCACAATTAGCTATCACTTACCGTATTAA
>Hetgly06195.t1 gene=Hetgly06195
ATGGAAGAGGCGGAGCGCAATTTGTTGAACAAACATTTACCCTTGGGTCTGGAGCTGTGGGTGCAGTCGTATCGCAAGGCACGCCTGTCCTGCCGCTTCAGCTTCGACGTGGAGCAGCAACGGTTCCGACTGCAGATTGACCCGGCACGGATCAAACGGGTGGAGCTGTCCGAGCAACTTGCCTACATACTCGGCTTCCACATGCGCCACCTGTCTGCACCGATGAGTTATGTTGGCTGCTTCCCTTGTGATCGAATCCCGTCCCATTCCTCTCCGATGCCACACTGTATGGTGGTGAACATGGACAAGGCTTCCGGTGGGGGGACCCACTGGGTGGCCATCTATGTTCAGTCACCATACAGTGCTGACTACTTTGACTCCTTTGCGGACTGGCCACCCGCATCGGAGCACATACGTCACTTCTTGGACCGACACTTCACCACCGTTCAGCACAATGCTCGCTGCCTGCAGTCTGAGAGGTCGGCCAGCTGCGGAAAGCATGTGATCTACTTCCTGCATCACCGTTGCCGGGGCTGGACACTACACCAGATCATTCAGCACATTGAGACGCAAAGGACCGAGCCCGACCGTCTCGTCAGCGCCTTTGTCCGCACACACGTGTTTGGTGACCTTTGA
>Hetgly06196.t1 gene=Hetgly06196
ATGCATGTGGATTTTGACCCATTGGCGGTGGACTGGTCCCACTTTGCGGAACCGCCGCCGCGCATGGACACCATGTTGATGAGTGGTGGAGGGAGTTCAATGGGTGGCGGCGGTGGTGGTGGATCGGCGTCGTCTTACCCCCCTGTTGCCATGCTTACGACTCTGGAAGAGCTCAAAGCCACACCATGTGGCACTCAGCTTGCGTCTTTTTGTGGGCAGATTGTCGTCAAATTTTACATGCTGAAAGCTCAACGCTTTCAAGAGCGTTTCGATGGAAAGACAATTTACGTTACGCCACTGGATTATGAATTTGTGGTGATGACTTTCACAAGAATGGAGGTGATTCAATGTGCCATTGCGACAGCGGATTCATTTGAGAAATTGACTTCAGGGTGCATTTATTCCTCATCATCATCATCACCATTGTCCTCGGCGGACAGCTCCACTTTCGGTGCGGTGATTTCCGCTGTACCCCCCTGA
>Hetgly06197.t1 gene=Hetgly06197
CGTAATGATTCGCCGGAGAAAAGTGGGTTAATGAGTCCAAACTTGCGCGGTTTGACATTATCTGAAGTGGTCAACAGAACGGAACTAATAATAAAGAAAAGCGGGGAATTAGAGAGAAGAAAAAACTTGCAAATGATGGGGCAAATCAGTAAAAATAATGACATATCACATTTGGAAGAGTCGTTTAAAGAAATGTTAAAATTCAAAAATAGTCAATCACCAAGAAAATGGGAGACGCCCAATTCGACGCCATCCAGCCCAGCGCCGTCCAATTCGGCACCGTACAGCAGAGAGCCGTCAAGTTTTACTCCGTCTAGTTCATCACCACGGATACTTAAAAATTGGCGGCGCCGAATCGGCGAGCGCCCAAGTAACACCGACCAGACAAAATATGTGAGAGGAAATCACTCAAAATCAAACAACTTGGAAGAGTCGTTTAAAGAAATGTTAAAATTCAAAAATAGTCAAGCATCGAGAAAATTGGAGACGCCCAATTCGACACCATCCAGCCCAGCGCCGTCCAATTCGGCTCAGTCCAGTTGTGCACCGTACAGTTTGGAGTTGTCCAGTCTTGCACCGTCTAGTCCAGCATCACGGGCATTTGAGAATTGGCGGCGCCGAATCGGCGGGCGCCCAAGTAACACCGACCAAACAAAATATGAGAGAGGAAATCACTCAAAATCACACAACATTGAAAGCAATTTTGACGAGGAAAAAG
>Hetgly06198.t1 gene=Hg199
ATGATAAAATTGGAAGTTGCCGAATCGGAAACCGTTGACAAAGTGAAGATGCTTATCCACCAAACCGAAGGCATTCCACCCGACCAGCAAATGCTGTTCATTCAGCTTGAGGACGGTCGAAGGCTAAGCGACTACAACGTGCAGAGTTCGTCTACGATTGGGATGGTCTTACGCCCGTCGTCAGCTAAAGAAAATCCTAACATGCACGAAGTGTCCACGCTTAGCATGGCCAACACCTGCGCGGTGTCCCCGTTTGGAATGCCCGTATTACCTTCGCCCGCTGCGGCAGATGCCAGCATGCGCGATGTGCCCACGTTTGGCATGCCCGGTACAAGCGAGGCCAACCTTCACGATACATCCCCGCTTGGGATCGCCCTACGCCCAGTGTCCGTCTCGTCTGATGCAAACATGCGCGCCGTAACTACGAGCATTGCAGTGCACCCAACGCCTGTCATAATTGCTGAAGTTCCTCATAGTTTTGCCGCATTGATGCGCAAAAGGCCTTTCTCTGCGAATGAAATGCCAAGCGAAGCGACGACTTCCTCTTTTACTCAACATGAAATATCTGTATTTGTCAGCAGTTTGAACAATATAATGCTGAAATTTGCAATGAAACGATCTGACAATGTGCAAGACATTATGGAGAAAATTTGGGAGCTGAAAGGCATTCCGATTGGAGAGCAGCGGCTGTTCTTCCGAGGCATTCAGCTCAACAAGGCTGAATTGCAAATTTTCCTACACAATGGGGGACATGAAAATGAGTTCGTTTTTTACCTGGTACCACGACCTGCCTTGCCAAGCGAGGAAATGCCAATTCTTCCACAATTGCATGTCTCTGACGAAATAAACATAAAAATGCCAAACGGTAAAGTTATACAAATGAGAGTGCATCGATGGTACACCATTCTATACATAATGAGGAAAGCCCAAGAACTGGAGAACATTCCACTAATTGACCAAACGCTGCTGTACAAAGGAAAACGGCTTAGAAGCGATGTAACCCTCGCGAATTATGGAATCGGGAACTATACGAACACTGAGTACGAGATAAAAACTCTTGACCTGTTGGTGAGCCAAGCATTGCCAATAATCACTTACGAAATATTTATTGGTGAATTGGTCTTATTAAAATTGGATGTTCATGACTGGAACACCGTGCAGCAGCTGAAGAAGAAAATTGAGGAGAAAAAAGGCATTGCCATGAACAAGCAAAAGTTGAAACTCGGGGAAATTGAACTGATAAATGAACTGACAATCCTGTCAACGCGGAGCATACGGACAGAAATTAATGCCAAAATGATGGTTCGGCAGCTGAAAGTTACGGTATCGGCAATGTCCTGGCGGCCCCGGGACCGAGTGACGGTGGTTGTGGTGCTGATTGTGCGCTCGATTTCCTTCGCACATGTGAAATAG
>Hetgly06199.t1 gene=Hg202
AGGATGTGCCGTAACTCTTCTCCGCTTGTAAATTCCGAATTGTTTCGGACAATTTTTTCGCTCAGCCTTCTCACTTTTGTCAATTTTTTGGGGCTTTCATCGGCCCAACAAGATGCTATTCGACGCTTTGAATATAAGCATAGTTTTCGTACCCCATATTTGGCACAACGGGACGGCACAATCCCATTCTGGACGGTTGCCGGCGATGCGATTGCCAGCGGGGAACAGCTGAGGTTGGCCCCGTCCATGCGCAGTCGAAAGGGCCTGGCCTGGAACAAACGTGCCTTTACCGAGAGTGACCATTTTGAGTTACAATTTGCCTTCAAAGTGACGGGCCAAGGCCGAATTGGGGGCGATGGGCTCGCCATTTGGTACACGGCCCAACAGGGCACGTTGGGACCCGTGTTTGGTGCCAACGATTATTGGACCGGCATGGCTATCATGCTGGACTCGTTTGACAATGACGGGCAGCGCAACAACCCGGCCATTTCACTGATGATCAACGACGGCACTCGCGCGTTTGACCATCACACGGACGGGTCCAACCAAGTGTTGAGCACATGCCAACGCGACTTCCGCAACAAGCAGTACCCGGTGCACATCAAGGTGGAATACTTCCGCAACACGCTCACTGTGCACGTGTCCGACGGGATGAGCGCGACGCCGCGCTTTGAAATGTGCATCCGCGCGGAGCACATTTTTCTGCCCAAGGCGGGCTTCTTCGGCGTGTCCGCCGCCACCGGAGGGCTGGCGGATGACCACGACGTGTTGGACTTCAGCGTGTTCTCCCTCTTCACGGACACGACTCAGTTGGAGCAGGCCAAGCAACAGTTGGCCACCGAGGAACGCTCACGAGCGCAAGCCGAATTTGAACGGCAACAACAAGAATATGAGAAGGAGAGGCAAAAGTTCAAGGAGCAGCATCCGGAGAAGGCGAAATCGGACGAGGAGGACGACCAGGCCAAATACTATGAGGACGCACAGCAGCGCGAGCTGCGGCTGATCTACGAGGCGCAGACGAACATCCACATGACCATGCAGAAGATGGAGTTGCAACTGACTGAAATTGTGCACTGGCAGCAGAAACAGCAACAACAACAGGCTGGAGCAGTACAGCAACAGGGAGGAGGAGCAGCAGTCCCTCCCGCCGCCGGCACTTTCCTGGCCCACGAGAAGAACGAGCTGATCTTGGGCGTGCGCGAGCTGAGCGCTACGCTGCGTGAGATGAAAAACTACGTGACGGAGACATACACGCGCGCGTACAACATTGAACAGAAAGTCATCCAACAACAGCAGCAGCAGCAGCAGCAACAGGCACAAGCTGGTGGAGCTGGGGTTGGCACTGCGGTCCATCCGAATGCCGCTGCTGATCAGACGATGGTGCGCAACTTTTTGGAGCAAATTCAGCAGGAAGTACGCCAGATTCGGTCCAACCAACAAATGGTGGCACAACAGCAGCAACAAAATTATCAACAACAACAACAGCACCACCAGCAGTACGGCACTCCCAACAACAGCCCAACTGCGACGACGATGACGAGCTGTGTGAGCAGCACAATGCTGATCACCATCATACTGCTCCAAACCGTGGCATTGGGTGCCCTCATTTTTATCCGCAGCAAAAGTGACAAGGCCAAGTTCTACTGATCAACAGCTGTCAATTTGCTTCTACCTGCTTCTTCGAAAATGCATAAAACGAAACATTTTTTTTTTCCATTTTTTCAAAATTTCTTTAAAATTCTGTCGTCAAAAAAGGCATTTCATAAATTTTTTTTTAAATGCGCATTACACTTGTCGAAAGTTCCCGTTTCATTCCAAAAACAGAGCTTTTTTAACTTTAACATATTTTTTGTTGTTTTTTTTGGACCAGATTTCTGAAAAATTTGAGCGGTATTTCAGACTCGGGCGCTGTTGAGAGGTGCCGACGGGAAAATTGAAATTTTTTTCTAAAATATGCTAAATTTCTCTTTAAATTTCTTTTTTTCCGTTTCTTGAGAGGGGCTGTTAAATTTTCCTAATCATTCATTTCGAAAAAAATTTTTTGTTTTTTTGTTGCTGTTTCAGTGAATTCTCATATCACTTTATGTTGTATTATGAACATACAAGGACAAGGGGGGGGGTCAGAAATTTGCTTTTACGAAATACGAAATACCGCCCACTGAAAAAAACGGTCAAAAAATTTTTTGACGCCCCTTTTGCTTTTTAACCCCACTTTTTACGGCGCTTTTTTCCAAAAAACTTTACGGAACAGTGGGGCGGACGGATAGACGCCGCGGGGAAAATTTTTGAAAAATTTGCTAACAAATTTTCACTGAAATCATCTATATTTTTTAATTTATGACATCCAGCTTCATAAAAAATTACGAATTTGGAAAAGACGAAATTCGTTAAAATTTTAACGAAGCAATTCTAAGCCATTGAATTTTTGTGTTTTTGAAACAAAATTTTGATAAGGTTTTCCCACTTTACTAGTTGCATTTTCGATTTTCACCAAAAATTTTACAAATAGACCCTCCCCCCTTGTCCACCTATGATTATGAATCTAATTGGTCGGTGGTTAGCATCAGTTTGGTTGGTACTGTTTCACTGTTACATTTTTTAGGGATTTTTTTCAAAAAGAATGCCAAATTTTAAAAAGGATTAAATTTTTTCAATTCTTCCCCTCTGTTTTCAAAATTTAATGGATTTTCATAATGATTTTGATCAAAAACAAATTTTACACACTGAAATGTTGCGCTGTCATTTCGATTATTATCTCTAAAGTTTTGGTTTTTTCATTTCCACAATTGTTGGCATGGTGTATTTTTGTTGTTATTATTGAAGTGATAAATTTTGTGGGTAATTCTGTCTGTCATAATAGAATAGTAAATAATTATTTTAGAAAAAATCACTCAAAAAAATTTATTTACGAAAAAATTATATGTCCAGAAAAATAGTTTTGTCCTTAATAAAAGTAGTTATAACTTACTTTTCTGTGAAATTGTAGAGGAAAGGGTGAATTCCAAACATTGGCATTAAACTAATTATATCAAAATAAAAAAATTCAAAAATTTATTATAAATAATAATACTTAAATAAAAATAATAAAAGCAAAAAAAGTGCTAAAAATAACAGTTTTTAAATTTCTTAAAACAATTAATATTAGAAATTTATTAAAATTTTCTAACAAGGTGACGACACTAACCACTTACTTCGACAGCAGGGTTGTTGCGAATCAAAAAATAAAACACGAAGCACGAAACGACCTAAAATCGGTTTTGGGTTCGACTTTTTCGATTTTTTGATCATTTTTCGGTTTTATACCAAAAAAAACGACCGAAAAAATTTTTGGAAAATTTGAAATTGGCGTTTTTTGTGTCAAAATGAACAGCTGAAAAGCTGTTTATGATTATTTAACTTTTTCCGTCTTATCATTGCTCTATTTTAAAATGAATTTTCGTTTCGCCTTTCTAATTAAGGAATTATGCCCTCTGAAAAATATTATTGGAACATCGGAGAGAAAATTAAGCAAAAGTGAAGAAAATATTAAAAAAAAGAATGGAATAAAACTAATACGAAAATAGCGAAAAGTTTAGGCATAAATCATACTTACTTACTTATTATAAGATGGATTAAATTCAAAAACAAACATCTCAAAAGCTACAAAGCAAAAAAAGATGAAGATAAATTTGAAATTGTACAAAAATTCAAAAATGGATTAAAGAATTGGTCTTCAAAAAAATAAATGCTACAAATCAAAAACTGATGAAGATAAATTTGAAATTGTTCAAAAATTCATTGAAATGAAAAATGAAATTAAATTACTAGAGCCCTGCTTTTCCACCTACTAGGACCTTCATTCCCTTAGTTTGAGGATATAACTTAAAAATTTTATCTTTTTAATTATGGATTAAATTAGTTCAAAAAATTTTCGTGTTTTTCGTTTTCGTTTCGTACGAGAACGGTTATTTTTTCGTTTTCGTTTTCGAGTTTCAAAATTTTTAATTTTCGTTTCATGTTTCGTTTTTGTGAAAAATAAATATTTTCGTTTTCGTTTTCGAAAATTATTTTTTTGGGTTTCGCACACCCTTTGTCAAAACTAGGGTTAATTCCTGGCGCAAGGTCGTTGCGCGAAACCCGCAAAAATTTAAGCAAATTAATTAAATAAAACTAATTTATAATTAATTATCTAAAATAAATCCCTAATAAATATAGAAAAGCATTTAATTCAATCAATTTGTATCTATGAAGTAGTTACTCCGGGCGATTTCCGTTGTTGGAAAACCACCGTTCCAAACCAAAGCCTATTGGTTTAAACCAAAGCCTATTGGATGGGTGCGGGAGTGAACCTAAACCTATTGAAGGGTTTTTATTGATTAATAATAAATTTAAATAATTAAATTAAATTAAAAATAAATAAATAATAAAAATAAAAATAAATAAACAATCCCAAAACTAAAACCTATTGATTTAAACCTAAACCTATTGGATGGGTGCGGGAGTGAACCTAAACCTATTGAAGGTTTTTATTGATTAATAAAAAATAAATTAAATTAAAAATAAA
>Hetgly06200.t1 gene=Hg204
GCACAGAACAAACTGCAGAAACTGAAAAACCCGCTGAAACAGGCACAGAACAAACTGCAGAACCTGAAAAACCAGCTGAAACAGGCACTGAACAACCTGCAGAAACTGAAAAACCAGCTGAAACAGGCACTGAACAACCCGCTGAAGAATCGCCAATATCAGTGCCAGCTGAGGAATCAACAGCGACAACTGTTGAAGTCAGCAAGGCGGTCAGTGAGGCGGGCCATGAAGTGGCGGAAGCAGGCAAAGCGGTAGGCGAAGCGGCAAAGGCAGTTGGCAACACGGCAGTTGCAAAGGTCGGCGATGCGCTGAGCGAAGGAGTTCAAGCAGTAGGCGAAGGTGCCAAAGCCGTCGGTGAGGGGGCCAAAGCGGTGGCCGAAGGTGCAGCGGAAAAAGTTGGCCAAGGCGTGCATGCTGTAGGAGAGGCAGGAAAAGCGGCTTCAAATGAGGCGGCCGAACGCGTCGCAGCGGTTGCTGAAGGGGCGAAGGCGGTCGGCGAGGGAGCAAAAGCGGTTGCCGAGGGGGCAGTTGCAAAAGTTGGCGAGGCAGGCGAAGCGGTGAAGGAAGGCGCGGCAGGAGCGGTTGCAGAAGCAGCCAAAGGCGTGGCAGAAAGTGCCAAGAAATTGGCCGAGAATGCCGAAAAAGTGGCGACTGAAAGCAAAGGAAATGACGCAAAATTAGTGATCGATTAAATTAGCCCCTAATTAGGCCATTTCGCTGCCCATAATCATTAAGAGATTTTTATCATTTAATTTAAAATTGAATAATAAAAT
>Hg204.1 gene=Hg204
TTTCTTTTTTAATTTATTTTTTTAATTTTAAAATTCGCCTGGCGCTGCCTATCGGCATCGCAGGGCCCAAAAATTCGTAAATCTTATTAAAAAAATTCTCTAAAAATTGCAAAAACCTATCATTTTTTGGACAAAATCTATTAACAGATCCATCAGTTTTCAAAAAATTTTCCCGGCGGCGCCTATCGGCACCGCCGGACCTCTACGCTCGCACATTCACCAAGTTTTTTTTTTTTTTTTGGAAAAATGTTGGCGAGGCAGGCGAAGCGGTGAAGGAAGGCGCGGCAGGAGCGGTTGCAGAAGCAGCCAAAGGCGTGGCAGAAAGTGCCAAGAAATTGGCCGAGAATGCCGAAAAAGTGGCGACTGAAAGCAAAGGAAATGACGCAAAATTAGTGATCGATTAAATTAGCCCCTAATTAGGCCATTTCGCTGCCCATAATCATTAAGAGATTTTTATCATTTAATTTAAAATTGAATAATAAAAT
>Hetgly06200.t2 gene=Hg204
ATTAATTTATTGAAACCTTTTAATGCTAAATTAGTTATAAGTAGAATATATAATGTTAAAAAATTTTACCAAAAAATTGTAAATTTTATAATAAATTTTAGCGAAAAAAATTTAATAATTTTTTAATTTTTCCGTCTAACAAAGAAAAATAAATTATTAGTTCCATCCAATTATTGCAAAATTTTGATGCTTTTGGAAAAATTTATGCCGATTGTTTTTTATATATAATCTTTTTTTTGATTTTAATTATTTTATAAATCTATTTAATTATTGAATTAAAAAAAATAAATATATATTCAAATTTATCTAATTTTTTTATTCAGATTAAAATTAATTTCTACATATGTTCATAAAGATGAATAACTATGCAAAAATAAATAAATGTTAATAAAAATAAGCATTTTGATGTTTTCCATCATTTTCTAATTTATGAAAAAATTTTCCATTTTTATTTCTGATTTTCTATCTCTTTTCTCCAACGAATGATTGGGTATGATGAAAATGATTGTTGGTTGCCACACAACGCCACAATTTTTTTAAATTTATTTTTTGTCAAAAAATATTCATTCCTTGCCCTCTCTCAACGTCTGATTGGCCCACCTCGGCTTTATCCCCGTCCCCCCTACACCTGTTTTTCCGCTTCACTTGCTCCGACGACCACGACGACCGATGAATTGATCATTTAATCACTTGTCGTGTATCGCCTCTGAACACCGCCTCCATCCAAAAAGCATGCCCATTTTTTGATCACCGCCTAAGGGATGGGATGGACCTGTTTCGGGGCGGGATGCTTTCTTTGTTTGATCAGCGACAGCAGATGGTGTGGCGGTGGAAAATTGCGTAAAAATTTTTATGAATTTCCTTTTTTTGGATCATTGTTACTATTATTTGGAAAATAATTTGTACATTTTATGATCGGTTTTACTCTGTCTGCCAAGGGACGACGGGTCGCACAAATTGTTGCAAAATTAAAAGTGATTGGAAGCACCCGGCGGAGGGGAACGGATGGATGATTGAGCACACAAATAAAATTTACTAATTAATTTGATCATGGCATATGTGCAATAATCAAGCGGAAAACCTTTTTTGTATTAATTTAATCACGGATGCTCAAATTGACCCGGAAATGGGTAATTAGGTTTGGATGAGTTGATCACAATTATCTACAATTTGGCAATTATTTGATCAGGGTAAAGCAATTAGTTGAAAATGATTTAGCCGCAAAATCAAAGCCAAATGATTGAATTATTAGAAGAGCAATCTGAATTTGTTCTGCATGACAAAAATAAAATGAGAATGTCAAAATTATGATCAGAATTTAAAGGATAATTAGGGGGTAATTCGCGTAACTAACTTACGTTAATTTATCACCTAACATTATCAGCGCGACATAGAAGGTTTAAACCAACAAATTCTGCTGCGGATGCTGATTCCATTGGCAATTATTTCCCTCCTAATAGATCAAGATTTGTTTCAAATTCTCCCGATTGATCATTAGTTTTTTCATTTTTCCATCAACAAAAAATTATTTTTCACCAAGATAAGCATCTCGAGCAGGGATTAATTAACGCCTCTATTAAATGCTCGATTGGTTGTTTTTTGCTTTTGCAACTAATCAGCACTAATAAACGCCCCGTCGGGCATGCAAATTAATGTGTGTGCATGCATGCATTTGCGGGAAAATGTTGCCCTTAGGGCAGAAAAAATTATTACTCGCCCACCATTTTTTTATGATCATTGTTTGTCCTTTCCATTTTCGCGCAAATCACCATCACCACCCATCACCAATCACCAGTAGCAGCAGCAGCAGCAGCAGGTGGTCACAGTGCGCGAAACAAAATTATTTATACGCCCACCATTCGCTGGACACTTTCACTTTCATTTTCGTCAACAGGCAAAAGCAGTTCCAACATGGCGCCTCCTTCGACTTCTTCCCATTGTTCTCTGTCCCGTTATTTTCCCCAAATTTTGGTCGCTTGAAAAATTCATTGGGTAAAATGGTGATCAAAATTGGCAACATTGGACTGATCACTGGTTTGATTAGGCAAAAAAACTCAATCATATTGGGATGATAATAACTGATCAATTCTTCATCGGCAAAATAATTCTTAATTTCCTGCTAGAGATATAACTGTTTCCCTGTAACCTGAAGGTGTTCGGTGCCGATCACTGTGATAACAGTTCGACAGACCAGTGATCAGCAGACAAAATTTCATTCTCAGAATAATGGGAAATAACCTGATTAGCATGTTCGGGTTAATAAATGAGAGATTAATGCCTGATCACTTGACAAAAAAAAAGAAAGAAAAATAGTAAAAAAAAATTCCTTTGACAAAAAGTGATCAAAGCGTAAATAACGGGGCACAATAGCGATCAGGTAAACTTCAGTTTTTGATTAATAGGAAATAACTCAGCAGTGATTGGGAAGGTCAGTTTTCTGATCATATCATTAACCTTTTTATTCTCCTGATCAGCAGTTGGTGTCAAATGCCATTAATCACTAGGCCAAAAAATTTTCAATTTTTGGAAAAAGTATATGCGCTGACTATTTAATAGAGGAAAATATTTTCCCATTTATTATTGCCAATTAATATATTTTAAATAAAGCATTAATATAGAGGTAGATAAACGAGCATAATTAGTACCATAAATGATCATCGATCGACGCTCGTCAAATGGCACCGATGTTGACGACACTTCGGCACGTGTGGCCGCTTATTTGGCACTTTGCATCTCCACGGCGATGGTCTGCATCACTGGCATGATGTTGACCTTTTTGCACAACGACACGGCACTGTTGTTGGACGAAATATCAACTGGCATGGACGAATTTAATGGTTTGGCCAACGAGGCATGGACTTCGATGATGTCCATCCAGCAAAGTGCACTGACCGATTTGGCTAAGCCATCGGCAGCAGTGGCACAAAAAGTTGCGGCACAGGAACACAAAGCATTTGACAGCGTATTCCGGCCAAAGCGTAACAATTTGCCAGCACAATGTGAATGTGCCACTGAACATGCGCAGAATTGCCCGCCAGGCCCCCAGGGACCTACAGGAAAAGAGGGAATGCCAGGCTTGAACGGCGAGCCGGGCCTTCCCGGGCCACCCGGCATTTCCGGCGTTCAATTTGGCGAGCAGATGTTCAGTCGGCCATGCATTCAATGCCGGCAAGGACCGCCCGGCAAAATGGGCCGCCGTGGCGACGTCGGACAGAGCGGACCGCTTGGCCCACCCGGCGTACCAGGCGCGCCAGGACGCATGGGCAACCCGGGCAAGGAGGGCAAAGTGGGCGAGCAAGGTGAAAGTGGGGCCAATGGAGCGCCAGGCATTCCAGGAGCGCCGGGTGAGTCCGGCTCATCCGGTCTGCCTGGACCGCCTGGACCAAAGGGTGAGCCGGGCGAGACCGGCACGTCGGGTGAGCCTGGGCTGGAAGGTGCCAACGGAGCACCGGGCGGAGATGGCGAGCCGGGCGAGGCTGGGCCAGCTGGGCTGCCTGGCATTCCCGGGCCCAAAGGACCGCCGGGAACGACTGGCACAAGTGGCGAGCCTGGCGTAGACGCTGCCTACTGTCCATGCCCACGAAAAACTCAGTATGTGGAGGTGCCCGGTGATGAACGCCCGGCTCCTAGCCGTAACGGTGGTGCTGCTAAGCCGGCGGCTCAACCGCCCAAATTGCCGACCGCTAGGCCAGAAGCACCGCCTAAAGAGGAGACCGAGCAACCAACGACAGCCGAACAAACATACAGCACACTGGCTGAGGGTACCAATGCTGGCACATCAGCAACACCATCAGCAGCAACTGAAGAAACTTCCGCGCCAGCTGAAGCAGTAACAGAACAACCTGCAGAAACTCCAAAATCGGCAGAAGAGCAAACTGCAGAAACTCCAGCACCTGCTGAACCAGTAACAGAACAACCTGCAGAAACATCAAAACCCACTGAGGAACAGACAGCTGAAACATCATCGCCAGAAGCTGAAGCAGGCACAGAACAGCCTGTTGAAACACCCAAATCATCTGAGGAACAACTTCCATTCCAAACGCCAAAACCCACGGAGGAAGGCTCAGAGACGTACAAACCGACTGAAGCAAGCACTGCTGAACAACAATCCACTGAAAGTCCAACACCCGCTGAAGCAGATGCAGGACAACCGGCCCAACACCCAAAAACCGCTGAAGCAGGCACAGAACAAACTGCAGAAACTGAAAAACCCGCTGAAACAGGCACTGAACAACCCGCTGAAGAATCGCCAATATCAGTGCCAGCTGAGGAATCAACAGCGACAACTGTTGAAGTCAGCAAGGCGGTCAGTGAGGCGGGCCATGAAGTGGCGGAAGCAGGCAAAGCGGTAGGCGAAGCGGCAAAGGCAGTTGGCAACACGGCAGTTGCAAAGGTCGGCGATGCGCTGAGCGAAGGAGTTCAAGCAGTAGGCGAAGGTGCCAAAGCCGTCGGTGAGGGGGCCAAAGCGGTGGCCGAAGGTGCAGCGGAAAAAGTTGGCCAAGGCGTGCATGCTGTAGGAGAGGCAGGAAAAGCGGCTTCAAATGAGGCGGCCGAACGCGTCGCAGCGGTTGCTGAAGGGGCGAAGGCGGTCGGCGAGGGAGCAAAAGCGGTTGCCGAGGGGGCAGTTGCAAAAGTTGGCGAGGCAGGCGAAGCGGTGAAGGAAGGCGCGGCAGGAGCGGTTGCAGAAGCAGCCAAAGGCGTGGCAGAAAGTGCCAAGAAATTGGCCGAGAATGCCGAAAAAGTGGCGACTGAAAGCAAAGGAAATGACGCAAAATTAGTGATCGATTAAATTAGCCCCTAATTAGGCCATTTCGCTGCCCATAATCATTAAGAGATTTTTATCATTTAATTTAAAATTGAATAATAAAAT
>Hg204.4 gene=Hg204
AGCTAATTAATTTATTTAATATAAATTTGTTCCAAATGTGCTGCATCAATTCAAAAATGTTGCTGCTCGTGGCGGCATTTGTTGTTCTGTTGTGCCTGCTCAATCAGAACGTCGGAGCTGAGAAAATCATTGTACTGTATAATGGGAAAAAGTACGATCTGACCGAGTTCCACAAAAGCCATCCGGGAGGTGAAGAGGTGTTGAAAAAAGTGAACGGAAAGGACGTGAAGGAGTATTTGGAGGGCAAAAAGGGAGTGAAAACGGACCATTTGGTGCAGCACAAACACAGCAAACATACAATCAACGAATTCTTGCCAACGTTCGAGATCAAAGTGAGATCAACGGGGAGGCGGAGGGGGGGGGGGGGATGGATTAAAAACAAATTAATTAATAATTTTTTTTTCACAAAGCAAAGTTATTTTAGAGGTTTTCACGGTCGGGGAATCCGATTCCTATATCCATTTCAACACAATTCGAACCTCGAACCAAAATTCGAACAAAAAATAAAAATTTGCGAATTTTTCTAGTTTCTATTTTTTGGTTCAAAACCGGCTTAAATGTAAGGAAACAAGCTAAAAGCAATCAATAATGAGATTTTACGAAATATTCTTGCCTTTATGCCAACTATTTATATTTTTGTTTTCAAATTTTGAACTTTTTCACGTAAAATTTCACGTAACGCACGTAAAATACGTTGTAGCTATAACTAAACGCCAGATTCATGAGCATCAAAAATTAGCCTAGAAAAAATTTTTTAGAAAAAAAATTTCAGGGGGGTGGCAAAACCCGGAATTACCGAATTTTAATTCGTAAATAATTAAAAGGGAGTAGCCAGAAGGTTTGGAAGCGTTGATTATCATCCACATGATTTTCCAGGGATGATTTGGTAAATTTTTCAGAAAATTTTTACTATTTATTCTTAACAAAATTCAGTAAAAAATCACATTTTTCTCTCGTGGCGCATTCACACTAGCGCTCAAATGTTTTTCAATTTTGAGCTTAAAAAATGTCAAAATTTGATTTTTACATAAAATTTGCAACCTTACGCCGAATTTTCAAAAAAAAAAACGGCACCCATCGGTTAAATGTAAATTATAAATGGAAAGTTTTTGACCTTAATTTGGGTGACAAACATAAAAAGAAATCTTTATGCTTTATAGGACAAATAAAAAAATTTTTTTTCAATTCCTTTTAATTATTTAAATAATTATTTTAAATTTAGCACTAAATTACAACACTTCGCCAACTGCAGAATGTTAGCTGAATTTAAATGAATGAATATTTAATAAAAATGAATGCTTACATATATTGACGCTTGTGTATTGTTACATAAATGTTAATTGAAATAATTAGAATAAATATTTGCCTTAATTAATTTGCTAATAAATAATTAAATTAATTTATTGAAACCTTTTAATGCTAAATTAGTTATAAGTAGAATATATAATGTTAAAAAATTTTACCAAAAAATTGTAAATTTTATAATAAATTTTAGCGAAAAAAATTTAATAATTTTTTAATTTTTCCGTCTAACAAAGAAAAATAAATTATTAGTTCCATCCAATTATTGCAAAATTTTGATGCTTTTGGAAAAATTTATGCCGATTGTTTTTTATATATAATCTTTTTTTTGATTTTAATTATTTTATAAATCTATTTAATTATTGAATTAAAAAAAATAAATATATATTCAAATTTATCTAATTTTTTTATTCAGATTAAAATTAATTTCTACATATGTTCATAAAGATGAATAACTATGCAAAAATAAATAAATGTTAATAAAAATAAGCATTTTGATGTTTTCCATCATTTTCTAATTTATGAAAAAATTTTCCATTTTTATTTCTGATTTTCTATCTCTTTTCTCCAACGAATGATTGGGTATGATGAAAATGATTGTTGGTTGCCACACAACGCCACAATTTTTTTAAATTTATTTTTTGTCAAAAAATATTCATTCCTTGCCCTCTCTCAACGTCTGATTGGCCCACCTCGGCTTTATCCCCGTCCCCCCTACACCTGTTTTTCCGCTTCACTTGCTCCGACGACCACGACGACCGATGAATTGATCATTTAATCACTTGTCGTGTATCGCCTCTGAACACCGCCTCCATCCAAAAAGCATGCCCATTTTTTGATCACCGCCTAAGGGATGGGATGGACCTGTTTCGGGGCGGGATGCTTTCTTTGTTTGATCAGCGACAGCAGATGGTGTGGCGGTGGAAAATTGCGTAAAAATTTTTATGAATTTCCTTTTTTTGGATCATTGTTACTATTATTTGGAAAATAATTTGTACATTTTATGATCGGTTTTACTCTGTCTGCCAAGGGACGACGGGTCGCACAAATTGTTGCAAAATTAAAAGTGATTGGAAGCACCCGGCGGAGGGGAACGGATGGATGATTGAGCACACAAATAAAATTTACTAATTAATTTGATCATGGCATATGTGCAATAATCAAGCGGAAAACCTTTTTTGTATTAATTTAATCACGGATGCTCAAATTGACCCGGAAATGGGTAATTAGGTTTGGATGAGTTGATCACAATTATCTACAATTTGGCAATTATTTGATCAGGGTAAAGCAATTAGTTGAAAATGATTTAGCCGCAAAATCAAAGCCAAATGATTGAATTATTAGAAGAGCAATCTGAATTTGTTCTGCATGACAAAAATAAAATGAGAATGTCAAAATTATGATCAGAATTTAAAGGATAATTAGGGGGTAATTCGCGTAACTAACTTACGTTAATTTATCACCTAACATTATCAGCGCGACATAGAAGGTTTAAACCAACAAATTCTGCTGCGGATGCTGATTCCATTGGCAATTATTTCCCTCCTAATAGATCAAGATTTGTTTCAAATTCTCCCGATTGATCATTAGTTTTTTCATTTTTCCATCAACAAAAAATTATTTTTCACCAAGATAAGCATCTCGAGCAGGGATTAATTAACGCCTCTATTAAATGCTCGATTGGTTGTTTTTTGCTTTTGCAACTAATCAGCACTAATAAACGCCCCGTCGGGCATGCAAATTAATGTGTGTGCATGCATGCATTTGCGGGAAAATGTTGCCCTTAGGGCAGAAAAAATTATTACTCGCCCACCATTTTTTTATGATCATTGTTTGTCCTTTCCATTTTCGCGCAAATCACCATCACCACCCATCACCAATCACCAGTAGCAGCAGCAGCAGCAGCAGGTGGTCACAGTGCGCGAAACAAAATTATTTATACGCCCACCATTCGCTGGACACTTTCACTTTCATTTTCGTCAACAGGCAAAAGCAGTTCCAACATGGCGCCTCCTTCGACTTCTTCCCATTGTTCTCTGTCCCGTTATTTTCCCCAAATTTTGGTCGCTTGAAAAATTCATTGGGTAAAATGGTGATCAAAATTGGCAACATTGGACTGATCACTGGTTTGATTAGGCAAAAAAACTCAATCATATTGGGATGATAATAACTGATCAATTCTTCATCGGCAAAATAATTCTTAATTTCCTGCTAGAGATATAACTGTTTCCCTGTAACCTGAAGGTGTTCGGTGCCGATCACTGTGATAACAGTTCGACAGACCAGTGATCAGCAGACAAAATTTCATTCTCAGAATAATGGGAAATAACCTGATTAGCATGTTCGGGTTAATAAATGAGAGATTAATGCCTGATCACTTGACAAAAAAAAAGAAAGAAAAATAGTAAAAAAAAATTCCTTTGACAAAAAGTGATCAAAGCGTAAATAACGGGGCACAATAGCGATCAGGTAAACTTCAGTTTTTGATTAATAGGAAATAACTCAGCAGTGATTGGGAAGGTCAGTTTTCTGATCATATCATTAACCTTTTTATTCTCCTGATCAGCAGTTGGTGTCAAATGCCATTAATCACTAGGCCAAAAAATTTTCAATTTTTGGAAAAAGTATATGCGCTGACTATTTAATAGAGGAAAATATTTTCCCATTTATTATTGCCAATTAATATATTTTAAATAAAGCATTAATATAGAGGTAGATAAACGAGCATAATTAGTACCATAAATGATCATCGATCGACGCTCGTCAAATGGCACCGATGTTGACGACACTTCGGCACGTGTGGCCGCTTATTTGGCACTTTGCATCTCCACGGCGATGGTCTGCATCACTGGCATGATGTTGACCTTTTTGCACAACGACACGGCACTGTTGTTGGACGAAATATCAACTGGCATGGACGAATTTAATGTAAATTTGGTGGGGAGTGGAGAAAATTGAAATTATTTTTTAAATTGATTGAATTAAATTTGAAGAAAAATAGTTTAGTTAATAAAAATACAAAATATAAAACTAAAAATTTGTGAAGAAGTAAATTAGATTAAAAATAGGATAAATATTAAACTTGGGAGTTTAAGTAATTAATTTTAATTGAAAAATTTTTTCTAATTTTTATACTATAAAGTCGTCGATTTTAATATTATAAAAATCCAAAAGGAGAAGCATTTGGTTTGCAAAAAAAAAAAAAAAAATTGTGATAAAACTAGTAAAAACTTGATCTCGTACTGTTTTGGGGTCCCTGATCACAAATCGGACATCTCTAATATTTTTACACATTCGTGATCAGGGTTCATTAAAATGTCTCTCCCGCGCAATTTTCAAAAAAATGTTTTGTAAGGACCAGCGGTAGCGATAAAACCGCATGGAAAATTGCAAAGATATAAGAAAATTTTGAAAAAAAATTTTTCAGGGTTTGGCCAACGAGGCATGGACTTCGATGATGTCCATCCAGCAAAGTGCACTGACCGATTTGGCTAAGCCATCGGCAGCAGTGGCACAAAAAGTTGCGGCACAGGAACACAAAGCATTTGACAGCGTATTCCGGCCAAAGCGTAACAATTTGCCAGCACAATGTGGTGAGTATGGGAAAACTTTTGAACAAATTTCAAACGGAACAACAAAAA
>Hetgly06201.t1 gene=Hg204
AGCTAATTAATTTATTTAATATAAATTTGTTCCAAATGTGCTGCATCAATTCAAAAATGTTGCTGCTCGTGGCGGCATTTGTTGTTCTGTTGTGCCTGCTCAATCAGAACGTCGGAGCTGAGAAAATCATTGTACTGTATAATGGGAAAAAGTACGATCTGACCGAGTTCCACAAAAGCCATCCGGGAGGTGAAGAGGTGTTGAAAAAAGTGAACGGAAAGGACGTGAAGGAGTATTTGGAGGGCAAAAAGGGAGTGAAAACGGACCATTTGGTGCAGCACAAACACAGCAAACATACAATCAACGAATTCTTGCCAACCACTAAATTACAACACTTCGCCAACTGCAGAATGTTAGCTGAATTTAAATGAATGAATATTTAATAAAAATGAATGCTTACATATATTGACGCTTGTGTATTGTTACATAAATGTTAATTGAAATAATTAGAATAAATATTTGCCTTAATTAATTTGCTAATAAATAATTAA
>Hetgly06202.t1 gene=Hetgly06202
CGAGTTACTAAGAATTTTATGTTTAACCCTCTTAATGAAGACCAACGCCAAGAATTATGCGAAACGTGGTTTTATACATTTAATGAAGACCATATAGACTACTCAGAACCGTTTGAATTTGTTTCTTCTGAATATGGACCGGGTGAGGTAACAGAAATTTTAGGGGATGGAAATTGTGGTTGGAGAAGCATCTCTCTTGCCTTAACTGGCACTGTGTCAAATCACTCCGAGATAAGAAAGGATGTAATTGAATATTTGGAAGAAACTGTTTACCAACATTCTTTTTCTAATCATCACGATAATGAATGGTGGTTGCTTTTTGATAGTATTGAAAATATAAGAAAACACATAGAGAATGCTATTGCTCCTGCAATAGGCGCCCATGAAATTGAAAAATGGATGAATAATTTGGATCTAGCAGCAGTCACCAAAATGTTTCGAATAAATATAATTGTGTGTGAACGTATACAAGAACGAATTTTCCGTTGGCAAGTGTACTCACCAGATTTAGAAACATCGCTTTCGAACCTCCAACAAAAGGAATCGACTGCATCAATATTTTTATACTTTCATGACGGTCATTATGAACTAATAAGAAAACCACAAA
>Hetgly06203.t1 gene=Hetgly06203
ATCCAGGACAAGGAGGGCATCCCGCCGGACCAGCAGCGCCTCATCTTCGCTGGGAAACAGCTCGAGGACGGACGCACTCTGGCCGACTACAACATCCAGAAGGAGTCCACTCTTCACCTCGTCTTGCGCCTTCGTGGTGGCAAGAACTAGAACGACGAACGGAAGAAATGAGTGATCTGTATCGATCCATATCCGTATCTTGAGACTGCCCTGTATTATTGTGTTCCGTTTTATTCATCATCATGAAATGTATTTCAATGACCACGGAACGATAAATCAATC
>Hetgly06205.t1 gene=Hg214
TGTTTTGTGGTTACATAAAAGGGATGCGATTTCACTCTTTTGTCACTTCCCTCTCCCATTATTTCTCGTATTTCAATTTTATTACACCACCGACGCGTGCGCACCGGCTCCAAGCACAATGGACGTTGACATGTGGAAACTGCCCTACTACCACGGACTGTTGCCGCGCGAGGACGTAGTGGAGCTGCTGCCGAACGATGGGGACTTCCTGGTGCGCATGACAGAAGAAATTTCGGGCACGGAGCGTGTGTATGCACTGTCGGTGAACGTCGGCGGCTTGCTGAACCACGTCATCTTCCGCCGACACAAAGGAATGTTCACCGTGGACCTCAACTCCGACAAGGGCTTCCGAACAATCGAACGATTCGTCGACAATTATCTGCGCACCGGAGTTTCCGTCACCACCCAACAATACGTCGCTCTCATCAGGGCCGTGCCCCGCGCGCACTGGGAGCTGTCGCACACTTCAATCATCCTGGGCAATGAACTTGGCCGCGGCACGTTCGGGAGCGTCAAGAGTGGCGTCTACGTGGATCAGCAGGGGACTCGAGCGGCGGTGGCCATCAAAGAGGTGTCTCAGACGAGCACCAAAGAGCAAATCAAGGAGTTCATGAATGAGGCGCGAGTCATGCGGCAGCTCCGACACCCCAATGTCATCCAGTTCTACGGCGTCGCGGTTGGCCAGGAGCCCCTGATGATCGTCATGGAGCTGGCGACGGACGGCAGCCTCACCAACTACTTGAAGCAGCAGCGGCGGAGCGCGCGGGTCAAACTCTACATGTGCCTCGGCGCAGCTGGCGGACTGGACCACATCCACTCGAAGGGCATCATCCATTGCGACGTCGCTGCCAGAAACTGCCTCTACACGGACGGCGTGGTGAAAATCTCGGACTTCGGCATGGCGACCAAGGCACTTTCAAAGCAAATCGAGAGAGGCGCAAAACTGCCCGTCAAATGGATGTCGCCGGATGCTCTGAGGGACCGCAGCTTCACCCAGAAGAGCGACACGTGGGCCTTCGGCGTGCTGTGCTGGGAAGTCTTCAACAATGGCGAGACGCCGTTCGCGCAGTTGAGCGGAAGCGAGGTCGCGGCAGCGGTGACAAACGGATACCGGCTGGAATTTCCCCACGACGCGCCTCCGAAGTTCGTCGAGTTCGTCATGCAGCACATCTGGGACCCGAAGCGCAACAACCGATACTCCATGGGCGCGGTGTACGACTGGCTGAAGCGACAGGCGGAAGGATCGCAGCCGCAGAACTAGTGCAACACGTCATCAGCGGCAGAAGAGCCAGCCCTGAGAACGATGCGTGTGGAGAAATCGGATCGTCTGACCCCCCTTGTTGTATCATATTGTATTGTAAACCCCCATTTCACATGATCAACCCCCCAAAAAACTGTTGTCATTTCAATT
>Hetgly06206.t1 gene=Hg215
ATGCAAAAAATTGTCCAACAACACGCAGCAACCATCGCGAACCAAGTGCAGCAACAGCAGCAGCAACAAACAGTTTCTTCTTCCGCTGTCGTCGCCCCTTCCGTGGGCATCGCTTCATTACCCCAATACCATGTGAGCGCGCCGCACCAGAACATGCCGGGCAGCAAGTACCAGCAACTGTTGCTGTTCATCGATGAATTGGGGCGTGTCATCCGCCCCACGTACAACGCGAATCGCAACGCGCAGGAACGCCTGAAGCGTGACATTGTGCAGGCGCGGCTGTTGGTGCGCGAGTGCATGGCCGAGTTGGAGCAGCAGCGCAAGCAGCAGCAGACGTGA
>Hetgly06207.t1 gene=Hg216
ATGTATTTGGTGCACAAACAGGGAAATGGCCAATCGGTGGAGGACGACATTTTGAATGATGAAGAGCTGCAGCAGCAGCAAAACTTGGCACATTTTGATTGGAACAAACAGAAAATTGAACTGCAAATTTTGGAGGCCGAACTCATTCAGAAACAGTTGTCCAATTTCCAGCGGTGCACTGAGCTTGGCATACCAGCTCGTGTCCATCTTCCGGTTGGCATTGTGCCAAGTGGCTCACAATCAGCGACCGGATGGAACCGCCGCTTTGCCACCTTTTCAAATGCGCACGCGCTTCAGCAACATTCCCCCGCAGGAAGGCAACAACGACAAATGCCGCATGGGCACGCGGACAACGGCTCGCGCGACAACGGCGGCATTGCCGGAATGTTTGCTGCTGCTGGCGATGACGACGACGGCACGCCTTGCGATTTCGTGGCATTTGCCGACATTTAA
>Hetgly06208.t1 gene=Hg217
AGAAACATTTTTTTAAAATTTCAAATTTAAATATATTTTTTTTCTGTTAGGCCATGACCCATTTCCCTGTTTGTGCACCAAATACATGTGCGTTGGCGTGCCCGCCGTTCTGTCCATGCTTTTGGCAAATATCAACGCGCACTATGCCCACGCGACAGCAACCGCGGCCGTTCTGCGCCTGACCGTTTCAACGCCACCAACGCCGGACAACAGCCGAGGCCGAGGACAACGAGCAGTGCAATTGGTGGTGGTGGTGGTACTGCTGACGAACTGCAACAGGAGGCGGAGGACAACGAAAGTGTTTTGCTGAACGGCGCCGAATCGCCGACCCCCGGCGGCGGCACTTTGGGCTACGCAATTTTGGCGGAGGACTCCAAAACGCTGGCCCCATTCTATGAAATGATGAGCGAAAGTGAGCTGAATGCCGAAATTGCAAAGTATGGCCATGGTCCGATGGGAAAACGTGCGGCTATCCGACTTTTGAACCGAATTTATGAGGCAACACACCCAGTGATTTCAAGCGACACGCCAATCCCGCGGAAAGTGCGGCGCGCATTGGCGACGGACGACGGCGGCGGTGACAAAAATGGGGCGGCTGAACGGCAACGGGAACGGAGGACCAAGCAAAAAATTGGCCAAATGTTGCGGTTGGCCAACAAAAATGCCGAGACGGAGACGACAGGGAATTATGCCAAGCAAAACGACGACGGTCGCGGCGATGGATTTGCCAACAATGCCAAAGAAAACGGTGCCGGACAAATGGCGGCGCCAACAATATCTAAACAACAACAACGGCACGGACAGCAGCAACAGCGGGGACCCGTGGACGCGACGGCAACGAAGGATGGTGGGGAGGCGGAGTTGACCAAATGCTTCCTCAATTGGTTGCGCAGTGCCGAGAACAGCAAACTGTACAATGAACTGTTGTCACTGAACCCTGTGCTGATTCTTCGTCATACGAATGTTCTGTTGGCCGACCAAATTGCGGCGCTTCAGCAGCGAATTGGCGCAACGGACGAACGATTGGCCCAATTGTTGGCTGAGCCGACCGAAAATCTGCAAAAATTGGAGTTTTCAACCCGTCCTCAAATTGGCACTGTTTTGGCCCGTTTCGAAGCGCAACATTTTGATGCCAGGACGAATTTTTTTATAATTTCGCTGGGTTTGCATGGTGTTTGGATGGACATTCATTCTCCCCTTTTGACCGTCCTCAACTCGGCCTCAAATTGGCATTGCTTTCGCCCCGTTTCAATGCTCCAGTGGACAAACATTTCAACGGCTGAAGGCCTGGTTTTTTGCAACACTTTGGATGGGCATTTCTGACCATCTTCAACTCGGTCTCAAATTGGCATTGCTTTCGCCCCGTTTCAATGCTCTGGTGGACAAACATTTCAATGGCAAAGCGGATTGCTGGCAAGTTTCAATTTTTCTCAAAGTAACCGGTCAAATGTTTAATAAGCTTTAAAATTGTGATTGCATTCGGC
>Hetgly06209.t1 gene=Hg218
ATGCAGATGCAAAAGTTGGTGCGACACAATCCCCGAAGGCACGTCAGCGAACCACAGGGGTGCGACAAATGCCCCGAAGGGACTGTCAGCTAACCACATTGGTGCGACAATGCCCCGAGGGGCCAGTCAGCGAACCGTATTGGTGCGACACATGCCCCGAGGGCCAGTCAGCGAACCGTATTGGTGCGACACATGCCCCTAGGGCCAGTCAGCGAACCGCATTGGTGCGACACATGCCCCGAGGGGCCAGTCAGCTAACCGTATTGGTGCGACACATGCCCCGAGGGCCAGTCAGCGAACCGTATTGGTGCGACACGTGCCCCGAGGGGCCAGTCAGCGAACCGTATTGGTGCGACACGTGCCCCGAAGGGCCTGTCTGCGAACTACATTGGTGCGACAATGCCCCTAAGGGCCTGTCAGCGAACCGTATTGGTGCGACACGTGCCCCGAGGGGCCAGTCAGCGAACCGTATTGGTGCGACACGTGCCCCGAAGGGCCTGTCTGCGAACCAAT
>Hetgly06210.t1 gene=Hetgly06210
ATGGCCAATTTAGTGAAATTGGTCGGCTTCTTCATCCTGGTTCTTTTATGGCCAAAAGCATTAGCAAACATAACAACGGAAGTGAAGGAAATGATGGACAAGTTTTCGTCACTAAAAGCTGATACAAATGACATCGTCACAAAATTGAGAAACCAGGGGCTAAGACCAGTTTTCAATTTAATTATTTGTTTACATTTTAAGCCAAAAGCTGAAGATCTAGAAGCCATTAAAATACAAGAACTAAAATCAGGAATTAAATATTATTTAATTCAAGATGAATATATAAAGGCTGTGACAAGCCCAATGAATGGTTTCGAGGAACTTTATAAAAATATAACGGACCCAGACAAAGACCGTTCCCAATATTTAGAAAAATGTCGTGCTGGGTGTTTAGGAAAGCTAAATTATATATCACCGATTGAAGCTTTGCAACACTTTTGGCCAAATCTATGGGCGGACGGACAACTGCAAAATGAACTAAACGAACTCCTACAGACTGCAAGCAGTATAGAGGCAGGACAAGCATTGATCAAAAAGCATTCGGATTTGCATGGCGTGCAAAATCTTTGCTCACAGCACATTGTGCCGTAA
>Hetgly06211.t1 gene=Hg220
ATGGGACTCGCGAAACAACTGAAACAAGAGCTTAGATTTTATCATAATTTGATCTTGATCCGAAATTGGAACTTTTGGAGTTCCTCTGCCACAATTACTTTGGGTGTCACGCCGACCGAAATCGATACTATCCGGGCCGAACAGGGTTTCAATCATAAAATAAACCCAGCAGATATAGCGAATGCACAAATTTTCCATGTCCACATGCTCCTGTGA
>Hetgly06212.t1 gene=Hetgly06212
ATGGCCAATTTAGTGAAATTGGTCGGCTTCTTCATCCTGGTTCTTTTATGGCCAAAAGCATTAGCAAACATAACAACGGAAGTGAAGGAAATGATGGACAAGTTTTCGTCACTAAAAGCTGATACAAATGACATCGTCACAAAATTGAGAAACGTGAGCGATGATATCGACGATTTCATTTCGGTCACACGTCCAGTGAGCGCATTAATCGAAGCAGGGGCTAAGACCAGTTTTCAACCAAAAGCTGAAGATCTAGAAGCCATTAAAAGCAGATACAAGAACTAA
>Hetgly06213.t1 gene=Hetgly06213
ATGGCCAATTTAGTGAAATTGGTCAGCTTCTTCGTGCTGGTTCTTTTATGGCCAAAGGCATTAGCAAACAGTCGTAACATCGGAGTGAAGGAAATGCTGGATGAATTTACGACGTTAACAGCCGCAACGCATGACATTGTTTCAGGATTGAGAATTTTGAGCGAGAATGCGGTGAAATTTCTCCGCGTCGCAGGTCCTGTGGGTGCGTTCATCGCAGCAGCAGCTGAAATCGCATTTAAACCAAAATCAGATGAGTTAGAAGCCATCAAAGAATTGCATACATACGTCGTGACACGGCCATTGGATCACATCGAACTCTTTTACAAAGATATTACGGATCCAAACAACGAACGTTCCTTATATAAACAACGATTCCTTAAAAAATGTTTTGATAATGATTCATCACCATTGATTGTTCTGGCTGACATGAAGCGTTCACTAAAGACTGATTGCAGTTTGCCATCACAGGAACAGATGGAGGGACATGCCGAAGTTCTCGAACTTTTCCAGAAAATTGAACATCGCCATTTTCAAAATAACAACATCATTCCGGAAGGATACCAACATATAAAACGCTCACTTTTGGCCAAATCAAAGGGCAGATACCTACAAAATGAACTAAATAAAATCCTACAGACAGCAAACAGTACAGATGTCGGACAAGCATTGATCAAACTGCACTCGGATTTGCATCTCGTGAAAAGGAAATGGCGGGACGAGGACACCAAAAGATTGAACCCGCTCATGGGACTCGCGAAACAACTGAAACAAGAGCTTAGATTTTATCATAATTTGATCTTGATCCGAAATTGGAACTTTTGGAGTTCCTCTGCCACAATTACTTTGGGTGTCACGCCGACCGAAATCGATACTATCCGGGCCGAACAGGGTTTCAATCATAAAATAAACCCAGCAGATATAGCGAATGCACAAATTTTCCATGTCCACATGCTCCTGTGA
>Hetgly06214.t1 gene=Hetgly06214
GGAACGACGACGTCCCATTGGATTGCCAAGAACGCGGAGCACATTTGCGGAAGGCTTTTTCCAACCGTCCGACCATCCGCCACTTCGCCGGGATCCATTTGACAAATTCCAAAGCTCTATCCCCTCCTACAATCGCTTCCGGGATGGAATTTCGGACCCAAGCTCACGCATGTTCAATGATGACGACTTGATGTTTTTTGACAATTTTCCGCGTCGCCCCTTTTATACGGAGCCGGAATTTTTTCACGCGACATTGCCACGAAATGAAGAACCACCAGCAGCATACTATCAAACGCAACCATCGCCACCAAGGGAACCAATGCCATCGCCGCAACCACCGCCGTCCCACAACAACCACCACCACCACCATCGTTCCAAATCGCATTATGACAAAGTTGGGGACAATTGGGAGCGTCCATTATTCCATCATCATGGGGGTGGTGGTGAAAGTGATCAGCCGGAACAAATGCTGTTTGATAATAACACTGATCAGCCTCAGCAGCCACAGCAGCAGCAGCACCATTTCCCGCAACAAAATCACCAAAGTCGGCATAATCAACAACCACCAAATGATCCGAATGTGCATGTGATAAAGATTCACCATGAAGGAAGAAGACAACCGCGAGAATCGTTGCCAAACAATGGGAGAAAATTTGTTGAAATTAATAATTCGGTGCCAAATTATGAGTTGTTGAACCCGGACAAACGCCGGCGGCGGCACGACAGCCGACAGGAGGAGGACAATGACAACAACAATAATAATGACAATGATGATGGTATTATGGTGAATAACAAAGTTGGTGGTGCTCACCATTATCGTCGTCGTGCTCCGTCCATACCGAACATTACCATTGATGACTACAGTACTACCAACAATAACAACAACAACAATGATGCTAGTGTTAATGAGGCGGTTAATGGCGGCAAAATGGGTGCCGCAATTCCGTTGCCGGCACCCGCCATTCCATTGCCAGCACCTGAAGCAGTCGAACACCAATCGCAACATCAAAATAACGAAGCATTGAATCAAGCAAATAAAAATGTTGTTGTTGTCGTTGATAATGATCGTAATAGTGCATGTGAACGTGCTGAACTTGATGAACATGTGGAGGAGAAGCAACACAATTATGGCATAAAACAGACAACTGCTGACGACATTGACCTCCTACAACTTCTTGATGAAACTGAGCACTTGACTGAGCAACTTAGAGAAAATGCGATCAAATTGGAGCAGGAGAAGGAGACAATTCTGGACAAAATTAACAACATCAAAGCATCATCGGCGGCTGGCATTAAGCCGACGGCAGCGCAATTTTCGCAAGCCGAACGTGACGGACTGATGTTGAACATGCAACGAATTTTGGCCAGGTGCAATACTGTGAACATATCAATTGAAACGCCACGTGATCAGCACCAATTCAAGGCATTGGAGCAAGTGAACAAGATGATACAATCAGTGTTGGACCATACAAATGGAAATATTGCAGAATCGAAACAAAAAATTGCCGCCTTTTTGAACGCGTGCCATCCAGACGAAGTTGGACGCATTGATGAAAAATTCCAATCTGTGATCATCGAATGTACAGCGGATGATCAAAAAAAAATTCGGCGTAAATTAGCACAAATTGTTGAGCAGATGAACCAGCAACAGAATAATCAGAATGTGAAAAAAATGTAAAGCAATTAAAAGTTGCTAAATTTGATGAAAAAAATAATTAATTTTAAATTTTTTTTTTTTAAAGTTTTTGTTGGACTTTTGTACTTATTACTGTATTCTAATTGAATTCCATTTTGTAAGAGATAAAATTGCCAATTCGTGGAATATAAAAATTTTTATTTTTTAA
>Hetgly06215.t1 gene=Hetgly06215
AGTTTTTATCGGGAAATTATGGGCATTCTACAAATCATTCTGTTGATCACGCTGCCATTTTTGGCACAAATCAGGGAAGCGGAGGCTGGGTGCTGCTGTTGTTGTTGCCCTAGCTGTTGCTGTAAGCCGATTATCATTAAATTGCCGCCACCACCTGTTAAGCTTTGCCCGTGCTGCTGCGGGTGCGGGTGCGGCGGCGGATGTTGCTGCTGCAAGCCATGCTGTTGCTGCTGCTGCAAACCGTGCTGTTGTTGCTGCTGCAAGCCTTGCTGTTGCTGCTGCCCGTGCTGTTGCTGCGGTGGCGGCGGTGGTGGCCGTAAGCGGCGCAGTGTTGTGGACCTGATGGCACGCAAATTCTCGGACGTGTTGTTGCCCCAGCACAACCAGGATGCCATGATGTCTGGCATGAACGGCGGTGGCTGTGGCGGTGGTGCGTCGCAAGGCGTTTCGCTTTCCCCATTGCACGCATTGTGCTCACAGATTCCGCCATCGCAGCGTGGCCCAGCCTGCCAACAGATCACTCAGCATGCCGCCGCACAACAATTTCCGCTTAGTCAGAACATTTTCAACCGTCAGCAGCAAGGCGCCATGATGACCAGTCCGGCGGTTGGTGGCGGCGATTTTGAGTGCGCCAACTGTCCCAATTGCCAAGCAGGCACATGCCAAGGCTGTACCGGAGCTGGCCAAGCGTTCCCCGCAAACTGTGATGCCGGTGCTGCAGGCGGCCAACACTGCAACTGTGCCGCCGCAGGCGGTCTCGGCAACAGTGGCAATCCGTCCGCATTTCACCCGCTGGGCGAAGACAACGCGTTCGGCCAAAGCTTTGACGCGCCGTCGCCATGCGGTGGCGGCGGCCTTGGCGGAGCAGCAGGCGGTGGACGTCGCAAGCGTCGCGCAATGCTCCTACGGTACCAGCCGATGCCATTCGGGCCGGCACCACAAGAGGGCGCAAAAACAAAGAGGGAGGTCAAGAATCAGCTGGTGTTCCGCAACAATCTCGAGTTTGTGCTCAGACAATCACCACCCGCCCTGCTCTCCGCTAACCTATAAAAAAGGAGGACGGACGGCACATTTAAGCCGCGGCATTTGGCTGAGACGAAACAATAAAAATAGATTTAAATTAATTAATTTAAAAAATTGAAAATTCAGTCATAGTTGCCTCATATAATTTTATAATTTATTTTCTTTTTATATATTTCATGGTTTGGTG
>Hetgly06216.t1 gene=Hetgly06216
ATGACGACGACGGCATCACTCAGTCTCCTCATTGTTGTGCTGGCACTAAACCTACGCAGCGGCATTGGCACAAAAGTGCGCTCTACACCGGTCAAAGACATGGGCAGCACCAAGTTGGGAACAATGAACGGCACAAATATTATGAGAAGCGCACCGAATGCCAACAGCACAACCAGCAGCAACAATTCACTTACAAAACGTTCTTGCTGCTGTTGTCCGTGCTGTTGCTGCTGTAAGCCATGTTGCTGTTGTGGTTGTGGGTGTGGCTGCTGCGGTTGTTGTTGCAACAAATGCTGCTGCTGTCCATGTTGTGGTGGGGGTTGTTGCGGAGAGGGTTGCCCCAATATTAAATGGGCTCCTTGCTGTTGCGGCTGGAAATGGTCCCCTTGCTGTTGTAAACCGTGCTGCTGCGGATGCACCGGTTACGGTCGCCGACGCATGATGCGACTCAGACGACGACGCAACGCCATTGTGCCAACCGTGATGATGCCGATGCCGGATCTGCTGGTGACAGTGCCGGCCTCGTCTCAGCACACGGCACAAATGGATGATCGGACAAAGATGGCGCATCGAAAAAAATGA
>Hetgly06217.t1 gene=Hetgly06217
ATGTCTTTGATCACGAGCATATCGCTGGCTGTGCTTGTCTTTGTGGTTGCAACTGTGCGCGAAAGTGAAGCCGGCTGTTGTACCCCATGCTGTAACCCACCATTGCTCATAAAACTGCCCAGAACATGCCCATGCTGCTGCAAATGCTGCTGTCCCTGCTGTTGCTGCTGCGGTGGTGGTGGCGGAGGCCGAAAGAGACGTGATGTTCGCCTGCTGTGGAAACGTGCCGTGCCATTTCCCCAACTGAAAATGCCGGCTTCATCTTCTCCCGCTTCTCCATTGGATTGCCAATGCAAGAACAATGGCAGCGCCACGGATGCGCGACCGGCGACGACAAAACGCGGCATTGTCATGCTGAATGGCTTCATGGCATCACCATCCAACGACAACAACAAGTCGAACTGA
>Hetgly06218.t1 gene=Hetgly06218
CCATTTTTTTTTTGATTTTTCATTTCATAGGCATACATACCCCTGCCGAATTTGAGGAAATTTTTTGCCAAACTTTGTAGATGCCTTTTACACCCAAGTGGAGGAGCGTGAACAGCCCCATCTCCGCGGCCGACCGTTGGCCGTCGTTCCGTTCAGTCGCGGTACAACCATCACGGGACAGTGCCGTTTCGGACAAATACGGGGGATGCGCCATCTTTGTCCGATCATCCATTTGTGCCGTGTGCCTGCAATTGAAGGCGTGGAGAAGGGAGACATCAGCAAATACCGGGACGCAAGTGGTGAAATCTTCAAAGTGCTGGTCGATTTTTCGGATCAAATTGTGGTGGAAAAGGCGTCAGTTGACGAGGTCGGACCATTTTTGGGCAAAAAAATTTTTCTTTTATTTTTTTAAAGGCATTTTTGGATTTGACTGCGCACTGTGAGATGGAATTAAACAGCCAACCAATGGAGGAATTGGTTCAAAAG
>Hetgly06219.t1 gene=Hetgly06219
ATGCCGTCGTCGTCATCTTTATACTTTGCCACATCCTCGGAGAATGGAGAATTAATCGTTTTGCTGCAACATTTTCACCCTAAAAATGTTGACTGGTTGACACGGTTGCTTGAAGGGCATAATGATGAGCCGGTCTGCTCAAATTTGCAGCCAAAATCGCTCGGCACATCCAAGCAATTTGCTGGTGCCTCAATGCTTGCAACGGTCGCGGAGGTCAAAAAATGGGTCCACGCGCTGTCCAACGAACTGTCAAAGCGTTTGGTGGCCGACGATGATAAGTATGGTCGCATTGCTCAAACATTGGTGGTCGGCTTCTCTGCCGGGCTAAGCGATCACAATGTCCGCACAATGCACTTGCCCAACTACACAACGGCGGACATCCAACAGGCATGCTGGAACTTCATGCGCCCATTCAATCGTGAGAAGGACGGCCATTCGTGGTACGGGTACAGGTATCCGCATGTCAGTTGCATTTACATGTCCGCGAGTCGTTTTGAACTTGTTGATCGCCGGCTGCCCACCAGACGCATCACCGAATTCTTCCACAAAAAAGCCTTGGGTGTTGAATGTGATGGCCAACAACAATGTTCAGGCAATGGCGATGATGAAGACGATGACGTTATCTTTTTGGCTGAAATGAATTTGCGAAAGGAATGCGACGGCGGTGGCAATGCCCAACGGCGGGAGGACGACAATGTTGAGCAGCAGCAGGAGACGGCGGCATGCAGCAACAACGTGGCGCAACAGCCCGCTAATGATGGCACCGACGGGGATGATGAAATTGTATTTTTGGGCAAACAGAAGGATGAACGTCACAATGGTCGGCGGCGGCGGCAATCGTTGACACGGCTCATTACGGAATTTTACCGCCCACGGCAGCAGAGGATGAGGACGATGATGATGATGGCCAAACCAATTTTGTGTGCAACCGGCAATAATGCCGTCGATCCTGCGGTTCCCGCGCCTGATCCTGCTCGGCCATTTGTTTTCCAGCTGCAACGGGGCAATGAGCTGTGCGGCGTGGCTTTTGCCAGCTTGCTCTGGCAACGCACCAAGGCATCGTCAACACCGCTGACGAGCGCGGTTCGCCCTTTCGTTGCCCCCCCCTGCTCATGCGCCTGTGGACCCTGCTAG
>Hetgly06220.t1 gene=Hg222
ATGGGGGAGTCAATTCGGGTGATCGCTTTGATTGATATGGATGCCTTTTACACCCAAGTGGAGGAGCGTGAACAGCCCCATCTCCGCGGCCGACCGTTGGCCGTCGTTCCGTTCAGTCGCGGTACAACCATCACGGGACAGGCCATTGCCGTCAACTATCCAGCCCGAGCCTTCGGAATCAAACGGGGAATGGACAGCAACGAGGTTTGA
>Hetgly06221.t1 gene=Hg223
ATTTGATTTCTAAAACAAAAAATTAAATAAAAATGTCTTTGATCACGAGCATATCGCTGGCTGTGCTTGTCTTTGTGGTTGCAACTGTGCGCGAAAGTGAAGCCGGCTGTTGCTGTTGCCACTGCTGCAAGTGTTGCTCGTGCTGTACCCCATGCTGTAACCCACCATTGCTCATAAAACTGCCCAGAACATGCCCATGCTGCTGCAAATGCTGCTGTCCCTGCTGTTGCTGCTGCGGTGGTGGTGGCGGAGGCCGAAAGAGACGTGATGTTCGCCTGCTGTGGAAACGTGCCGTGCCATTTCCCCAACTGAAAATGCCGGCTTCATCTTCTCCCGCTTCTCCATTGGATTGCCAATGCAAGAACAATGGCAGCGCCACGGATGCGCGACCGGCGACGACAAAACGCGGCATTGTCATGCTGAATGGCTTCATGGCATCACCATCCAACGACAACAACAAGTCGAACTGATCGAATTTGTGTGGTGTGTGGTGGTGGTGAAAACGAAAATTCATATTTATTCATCGAAATTTATATATTTTTTTTGAATTAGGACAATTTTTTATTGCAAATTTTTTGTTGGTGTTATTGTTTCATTTGTTAAATGACATGTTGTTTTCGGAGATGCGTACC
>Hetgly06222.t1 gene=Hetgly06222
ATGACGACGACGGCATCACTCAGTCTCCTCATTGTTGTGCTGGCACTAAACCTACGCAGCGGCATTGGCACAAAAGTGCGCTCTACACCGGTCAAAGACATGGGCAGCACCAAGTTGGGAACAATGAACGGCACAAATATTATGAGAAGCGCACCGAATGCCAACAGCACAACCAGCAGCAACAATTCACTTACAAAACGTTCTTGCTGCTGTTGTCCGTGCTGTTGCTGCTGTACGTTTATTGTAAGCCATGTTGCTGTTGTGGTTGTGGGTGTGGCTGCTGCGGCAACAAATGCTGCTGCTGTCCATGTTGTGGTGGGGGTTGTTGCGGAGAAGGTTGCGGCTGGAAATGGTCCCCTTGCTGTTGTAAACCGTGCTGCTGCGGATTTTAAGGGCACCGGTTACGGTCGCCGACGCATGATGCGACTCAGACGACGACGCAACGCCATTGTGCCAACCGTGATGATGCCGATGCCGGATCTGCTGGTGACAGTGCCGGCCTCGTCTCAGTCCCACGGCAGCGACCGCCGCGTGCCCGGGAGCAGCAGCCCAGCGGCGACGCAGCCGGTGCCGTCGCACTGCGAGTGCCACCGGCAGCCGGCGGCGACGACGATGGGCTGCGAGTCGGCCGGCAATAACGACCATAATTTGCCTGCTGCCGATGCCGTGCATGGAGCGAAAACAAAATTTTGA
>Hetgly06224.t1 gene=Hg224
ATGGGACATTTTTCGCGTCCTTTTTACCACCAGCACCAACAGCAGCAGCAACGAATGAATGGTTACTATTATCATTTTCGATGGGAGACGGGCGCCTCAAAGATTTATTTATTCATTTCATCTTACACAAAAACAATCGTCTTAAATGGAACGACGACCTCTATCCCCTCCTACAATCGCTTCCGGGATGGAATTTCGGACCCAAGCTCACGCATGTTCAATGATGACGACTTGATGTTTTTTGACAATTTTCCGCGTCGCCCCTTTTATACGGAGCCGGAATTTTTTCACGCGACATTGCCACGAAATGAAGAACCACCAGCAGCATACTATCAAACGCAACCATCGCCACCAAGGGAACCAATGCCATCGCCGCAACCACCGCCGTCCCACAACAACAACAACCACCACCACCATCGTTCCAAATCGCATTATGACAAAGTTGGGGACAATTGGGAGCGTCCATTATTCCATCATCATGGGGGTGGTGGTGAAAGTGATCAGCCGGAACAAATGCTGTTTGATAATAACACTGATCAGCCTCAGCAGCCACAGCAGCAGCAGCACCATTTCCCGCAACAAAATCACCAAAGTCGGCATAATCAACAACCACCAAATGATCCGAATGTGCATCTGTTGAACCCGGACAAACGCCGGCGGCGGCACGACAGCCGACAGGAGGAGGACAATGACAACAATAATAATAATGACAATGATGATGGTATTATGGTGAATAACAAAGTTGGTGGTGCTCACCATTATCGTCGTCGTGCTCCGTCCATACCGAACATTACCATTGATGACTACAGTACTACCAACAATAACAACAACAACAACAATGATGCTGGTGTTAATGAGGCGGTTAATGGCGGCAAAATGGGTGCCGCAATTCCGTTGCCGGCACCCGCCATTCCATTGCCAGCACCTGAAGCAGTCGAACACCAATCGCAACATCAAAATAACGAAGCATTGAATCAAGCAAATAAAAATGTTGTTGTTGTCGTTGATAATGATCGTAATAGTGCATGTGAACGTGCTGAACTTGATGAACATGTGGAGGAGAAGCAACACAATTATGGCATAAAACAGACAACTGCTGACGACATTGACCTCCTACAACTTCTTGATGAAACTGAGCACTTGACTGAGCAACTTAGAGAAAATGCGATCAAATTGGAGCAGGAGAAGGAGACAATTCTGGACAAAATTAACAACATCAAAGCATCATCGGCGGCTGGCATTAAGCCGACGGCAGCGCAATTTTCGCAAGCCGAACGTGACGGACTGATGTTGAACATGCAACGAATTTTGGCCAGGTGCAATACTGTGAACATATCAATTGAAACGCCACGTGATGAGCACCAATTCAAGGCATTGGAGCAAGTGAACAAGATGATACAATCAGTGTTGGACCATACAAATGGAAATATTGCAGAATCGAAACAAAAAATTGCCGCCTTTTTGAACGCGTGCCATCCAGACGAAGTTGGACGCATTGATGAAAAATTCCAATCTGTGATCATCGAATGTACAGCGGATGATCAAAAAAAAATTCGGCGCAAATTAGCACAAATTGTTGAGCAGATGAACCAGCAACAGAATAATCAGAATGTGAAAAAAATGTAA
>Hetgly06225.t1 gene=Hg225
CTTCATGGGTGGCTAATAGCCATAATACCAAAATTTTCAGATAAATTTGAACACATTTCTAATGGCCAATTTAGTGAAATTGGTCGGCTTCTTGATCCTGGTTCTTTTATCGCCAAAAGCATTAGCAAACATAACACCGGAAGTGAAGGAAATGATGGACGAATTTTCGTCGTTAACATCAGCAACGCATGACATCATTTCAGGATTGAGAATTTTGAGCGAGAATGCGGTGAAATTTCTCCGTGTCGCAGGTCCTGTGGGTGCGTTCATCGCATCAGCAGCTGAAATCGCATTTAAACCAAAATCAGACGAGTTAGAAGCCATCACAAAATTGCATAACTACTTAAAAACAGAATTTGGACAGCTCAGACTGGAAATAGGAGAACTAACAATAAAATTCGCCGAACTTTTAGCCAAAAGTGAATATAGAAAGGAAGTGACCCTGCCATTGAATCTCATCGAACCCTATTACAAAAATATTACGGATCCAAACAAAAAACGCTCCTTACATAAACAAGAATTCATTAAATATTGTTTTGACATTGGTACATCACCGTTGATTGCTCTGCAAAAGATGTTGTTTTACCTAAAGACTGAATGCAATTTGCCGTCACAAGAACAGATGGAGGGTTATGCCGAAGTTCTCGAACTTTTTCAGAAAATTGAACAGCGACATTTTCAAGATAATAATAACATCATTCAGACGGAGGAATACCAATATTTAAAACGCTCACTTCTGGCCAAATCAACGAGGGGACAACACCTACAAAATAAACTAAACCAAATCCTACAGACAGCAAACAGTACAGATGTCGAACAAGCATTGGTCAAAATGAACTCGGACCCGCATGTCTTGCAAGGTGCTTGTTTGTTAGAAACAATAGCTGTTGCAAACGAATGGAAAAGAGAACCGCTTTTTAATTTCGCGAAGATGGTGCGTCTGGATTTGATGAAAGCCTTTTTGATTGCGTCACACTGTGTCGAAGTTAGGGACGAAGGATTAATTGAGGATAAGCTTGAAGAGATTAAGTTGTTGTTCGAAGAAATTGCTACACATATGGCTAACTGGATAGAAAGACTGCTGGAAGTCACTTGGCCAACAATTTCGCGCGCATATGCAAAAAATAAAATTGGTACAACGGCTATTGTTGAGAGTGAAGCCGAGTATAAAAAAGTAGCGCAGAGGGTAAAGGAAAAGCTTGATACAATAGCCGGAAAAAAATATTTTCACACGGTCATCGTTTTCCCAAATTGGAGTAACGCATTTCAGTTGGCGATCCTTGCTAAACAAAGTCACTATTTCTTTTTGGACGGCCAAAATGAAATCAACGAAAACCAAATCAATGTGATCGTTGTTCGGTGTGAAGACGACAGTTATGAAAGGGCGGTCCAAGCGGGGCATTGGTTTACTACCCAACCAGTTGAAAAACAAATGAAAGACATGATAAAGAAATGGCGGGACGAGGACACCAAAAGATTGAACCCGCTCATGGGACTCGCGAAACAACTGAAACAAGAGCTTAGATTTTATCATAATTTGATCTTGATCCGAAATTGGAACTTTTGGAGTTCCTCTGCCACAATTACTTTGGGTGTCACGCCGACCAAAATCAATTCTGTCCGGGCCGAGCAGGGTTTCAATCATAAAATAAACCCAGCAGATATAGCGAATGCACAAATTTTCCATGTCCACATGCTCCTGTGAGTTATGCGACAAATTCGAGAAGAGTCTATATTTTGCATTTTTTCATTATTTATCGCGATGTTATCTAATATCTATCTATCTGTCTATCTCTATCTATCTATCTATCTTTACAAATTTGTAATCATGAAAATAAAGCAATTAGTTCTAGATAAAATGTCATGAAA
>Hetgly06226.t1 gene=Hetgly06226
CCAATTAGAGTTGAGCAAGACCGGGAATTTTGAGCAAACCCGGGACCGGGACCTTTTCGGGTTGAAACCGGGACTAGTCCCGGTCCCGGTCAAAACCGGGACCTCGATACTCAGTTGTACTCAGTTGTCCGTGTCCAGGTCCCGGTCCCGCTCAACTCTAGTGCCAATAGCCATAATACCAAAATTTTCAGATAAATTTTAACAAAATTCTAATGGCCAATTTAGTGAAATTGGTCAGCTTCTTTATTCTGGTTCTTTTATGGCCAAATGCATTAGCAAACATAACAACGGAAGTGAAGGAAATGATGGACAAGTTTTCGTCACTAAAAGCTGATACAAATGACATCGTCACAAAATTGAGAAACGTGAGCGATGATATCGACGATTTCATTTCGGTCACACGTCCAGTGAGCGCATTAATCGAAGCAGGGGCTAAGACCAGTTTTCAACCAAAAGCTGAAGATCTAGAAGCCATTAAAGTATGGCATAACTTTGTAAAAGTCGAGTTTGAAAACCTTAAAGAGCAGATACAAGAACTAAAATCAGGAATTAAATATTATTTAATTCAAGATGAATATATAAAGGCTGTGACAAGCCCAATGAATGGTTTCGAGGAACTTTATAAAAATATAACGGACCCAGACAAAGACCGTTCCCAATATTTAGAAAAATGTCGTGCTGGGTGTTTAGGAAAGCTAAATTATATATCACCGATTGAAGCTTTGCAACACTTTTGGCCAAACCTATGGGCGGACGGACAACTGCAAAATGAACTAAACGAACTCCTACAGACTGCAAGCAGTATAGAGGCAGGACAAGCATTGATCAAAAAGCATTCGGATTTGCATGGCGTGCAAAACAGTTGTTGGCTAGAAAAAATAGCTCAAGGAAACGAATGGAAACGAGAGCCGCTTCTTCGTTTCGCTGATATAATGCGTCTGGATTTAATGAAAGCCTCTTTGCTCACAGCACATTGTGCCGTAATTTTGTATGATGACACGTTTGCTCAACTCATTTTGCTTGCATTGGTAAAAGAAACAACAAAAGCAACTGCTCTAAAGATGGTTGAATGGATAGAAAAAAAGCTGAAAATCACTTGGCCAACAATTTCGATTAGTCGCGCAGAAACAGCAATTGGCAATTTGCCTATCGTTAAGAATGAATCAGAATATAATATTGTAGCGCACAGGATAAAGACAGAGCTTGATCAAATAGGCGAGAAAAGATTTTTTCACACGGTCATTGTTTTCCCTGATTGGACCGACGAACGACAGAAGGCGGTCATTTGCGATGATTATTACTGCTTCAAGTTAATCAAAAACAATATCAATGTTATCGTTATTCGATGCGAACACGACCGCTATGAAGAGGCGGTTGCAGCAGAGGACTGGTTTAACCAGCAGACAGTTGAAGAACATATGGAAAGCATGATAAAGGAATGGCTGAAAACCAAAAAGGATGAGCCGCTCATTACACTCGCGATTCCCATGTACCCACATTTATATTATCGTAGCATGGTCTTGCTACGAAATAGGGCCATCCCTCGAGCCGGAACCACAATTACATTGGGTGTTACTTCGACCAGAATCAGTTCTGCTAGGGCCGAACGGAGTTTCAATAAAATGATAATCACAGAAGATGGCATAGAAGAAATTTTCCATGTTCACTTGCTCGTGTGAATTATGCGATAAAGCAGAAAACTCAACCGACTGAGCAAATATCTTCTATCATTTACTTGTTCACCAAAAAATTGGTCAACTAAATCCATCTATCTTCCTTGCTATATTTACATAAATATGAGAACAGAACCACCATTTTATTTTTGTAAATTTAAATAAAATTTCTTTTGAAA
>Hetgly06227.t1 gene=Hetgly06227
ATGATAAATTTGAACATATTCCAAATGGCCAATTTAGTGAAATTGGTCGGCTTCTTCATCCTGGTTCTTTTATGGCCAAAGGCATTAGCAAACATAACATCGGAAGTGAAGGAAATGATGGACGAATTTACGATGTTAACAGCCCCAACGCATGACATTATTTCAGGATTGAGAACTTTGAGCGAGGATACGGCGAAATTTCTCCACGTTGCAGGTCCTATGGGTGCGCTCATTGCAGCGGCAGCTAAAACCGCCTTTAAACCAAAACCAGACGAGTTAGAAGCCATCACACAATTGCATAACTACTTAAATACTCAATTTGAAAAGCTCAAACTGGAAAGAGGAGAACTAACAAAAAAATTCACACAACCTTTAGGCGAAAATCAATATAGAGAGGCTGTGACACTGCCATTGTATCTCATCGAACATTTTTACAAAGATATTACGGATCCAAACAACGAACGTTCCTTATATAAACAACAATTCATTAAATATTGTTTTGACATTGGAACAGATGGAGGGATATGCCGAAATAATAACAACTTCATTCACACGGAGGAATACCAATATTTAAAACGCTCACTTTTGGCCAAAGCAACAGGCAGATACCTACAAAATGAACTAAACAAAATCCTACAGACTGCAAGCAGTAAAGATGCCGGACAAATATTGATCAAACTGTACACAGATTTGCTTTTCGTGCAAAGGAAATGGCGGGACGAGGACACCAAAAGAACGAATCCGCTCGTGGGACTCGCGAAACAACTGAAACAAGAGCTTAGATTTTATCATAATTTGATCTTGATCCGAAATTGGAACTTTTGGAGTTCCTCTGCCACAATTACTTTGGGTGTCACCCCGACCAAAATCAATTCTGTCCGGGCCGAACAGGGTTTCAGTCATAAAATAAATCCAGCATTTGCGAATGCACAAATTTTCCATGTCCACATGCTGCTGTGA
>Hetgly06228.t1 gene=Hetgly06228
CCAAATGTTTGGTGGGCTGCATGACGGCATGCAAAATGCTCATCAACGGCACGGTGATCGTCGACCAAATTGACTGGGTGAATCGCGACACAATTGGCTTCAAACACTCGTCCCATCCCACCACACTTTTGCGTGAGACTGAAATTACGGATCAAATCTTCCGGGAATGGGTCGACCAATTGGTGTTGCGGGGTGAACCGTTGCCTCTTTTTGTGCCGCTCAGAGAACGTAAAATGCATTTGGTGAACCGTCAGTTCGTGCTCAGCGGAGCGGAGACGGGTGGACAACAGCAAAACCAAGCAGGAAAGCAACGAATGATTTTGGTCGATCCATGGCAATTGGTTCAACTGCTCCAACTTGGCCAAGCCGAATTTGAACGGGTCGTGGTCGGATTGTACGCAATCCTTCGGAAGCCATGGTCACTCGAACGAATTGAAGGCGTCACATGGAATGCCGTGCCGACGTACAAAATTTGTGGCCAAGGGCCCCTGAACGTTTTGCTGTGCTTCAACGGTTTCAGCTACAAACTGTGCAAAGTGGATTATTCAAGGCCGAACTCTAACCACGAAATATTGAAGAATGAGACGATGGTTGCCAATTTCATCGCTCCGTCTGCCGAGCACATTAATCGTAAGGCTCAAGAATTGGGGGAAGCGCTGCGCAACACCAAACGAATTAAGCGCAAGGAGGGAAAGAATAGGAGGAGGAATAAGAAGAAGCCGAAGCTTGAAATTTGATCATTTGTTTTGCTCATTAGGTTCCAAACGACGCGTGGTTTAGCACTTGCAGAAGAAAGACCCAATTAATTAATGATATATTGTAATTGGAAAGATTCGATATTTATTGACTTTTACGCAGTATGCAAATGCAATGGTAAAAATTGGGAA
>Hetgly06229.t1 gene=Hetgly06229
ATGGCACAAAATTTGGACAATTCCGAGGACGATAACATTGAGCTGCGAAATTTTGGGAAGCCGTGGTCACTCGAACGAATCGAAGGCGTCGCATGGAATGCCGTGCCGACGTACAAAATTCTCGACCAAGGGCCCCTCAACGTTGTGCTGTGCTTCAAAGAGTTCACCTGCTCAATGATAAGAGTGGATTCTTCAAGGCCGTGCTCTAACCATGGAGTAATGAAGAATAAGACGATGGTTGCCAATTTCACCGCTCCGTCTGCCGAGCACATTAATCGTAAGGCTCAAGAATTGGGGGAAGCGCTGCGCAACACCAAACGAATTAACCGCAAAGAGAGAAAGAAGAAGAAGACGCATAAGAAGAAGCCAAAGCTTGAAATTTGA
>Hetgly06230.t1 gene=Hg226
ATGTACCCACATTTATATTATCGTAGCATAGTCTTGCTACGAAATAGGGCCATTCCTCGAGCCGGAACCACAATTACTTTGGGTGTTACTTCGACCAGAATCAGTTCTGCTAGGGCCGAACGGAGTTTCAATAAAATGATAATCACAGAAGATGGCATAGAAGAAATTTTCCATGTTCACTTGCTCGTTGAAATTGTCGGCTTCTTCATCCTGGTTCTTTTATGGCCAAAGGCATTAGCAAACATAACATCGGAAGTGAAGGAAATGATGGACGAATTTACGATGTTAACAGCCCCAACACATGACATTATTTCAGGATTGAGAACTTTGAGCGAGGATGCGGCGAAATTTCTCCACGTTGCAGGTCCTATGGGTGCGCTCATTGCAGCGGCAGCTAAAACCGCCTTTAAACCAAAACCAGACGAGTTAGAAGCCATCACACAATTGCATAACTACTTAAATACTCAATTTGAAAAGCTCGAACTGGAAAGAGGAGAACTAACAAAAAAATTCACACAACCTTTAGGCGAAAATCAATATAGAGAGGCTGTGACACTGCCATTGTATCTCATCGAACATTTTTACAAAGATATTACGGATCCAAACAAAAAACGCTCCTTATATAAACAACAATTCATTAAATATTGTTTTGACATTGGTACATCACCATTTTTTGTTCTAGTAGAGGACATGAAGACCTCCCTAAAGTATGCTTGCCGTTTGCCATCACAGGAACAGATGGAGGGATATGCCGAAGTTCTCGAGCTTTTTCATAAAATTGAAAAGCGCCATTTTCAAGATAATAACAACTTCATTCACACGGAGGAATACCAATATTTAAAACGCTCACTTTTGGCCAAAGCAACAGGCAGATACCTACAAAGTGAACTAAACAAAATCCTACAGACTGCAAGCAGTAAAGATGCCGGACAAATATTGATCAAACTGTACACAGATTTGCTTTTCGTGCAAAGGCCCATCATCAACGCGGAGCTGTCCATGCCAGCCGCTTGGAACAGTTGCTCCAACGCCGCGTTCATGCTGGCCAACGAGGCAGAAGAGGTGGATGATGAGGACAGCGCTTTCCTCAGCCACAATTACTTTGGGTGTCACCCCGACCAAAATCAATTCTGTCCGGGCCGAACAGGCTTTCAGTCAAAAAAGAGAGAGAGATAA
>Hetgly06231.t1 gene=Hg227
AGGTATATACATCGTTTTTTTCATTCTTAATTTTCAACAATTGTGGAATGTTTGGCATGAATTCGGCCTCCTCGTCTTCGATGGCTTTGGACTTGTCGAATGTGAAGAGGGAGCTGAAGGTGGAGGAGGAGCAGGAGGATGAAGATGAGGATGAGCAGCGTGGGCCTCCGTTGTCCGATTTGGTCCATTCGAAGAAAGTGCTGAAAGAAGTGGTCGTCCCCTACGGCACTGTGCTCAATTTGTGCCGTTCGCAGGGCGATGCGGCGGCGGTCACCAAATGTTTGGTGGGCTGCATGACGGCATGCAAAATGCTCATCAATGGCACAGTGATCGTCGACCAAATTGAGTGGCTAAATGGCAACACAATTGGGTTCAAACACTCGCCGATGTTCTCTCATCCAACCTCGCTTTTGCGTGACACGAAAATTACGGACCAAATCTTCCGGGAATGGGTCGACCAATTGGTGTTGCGGGATGAGCCGTTGCCTCTTTTTGTGCCGCTCAGAGACCGTAAATTGAATGTGGCCAACCGCCAGCAGTTGAAGGGACAGAACAACAAAATTGGGAGACGGGCGGCTAAAAAAAAGGAGCGGCGCGACGCGTTCAGGCACACTTTTGGCGCGGACGTTGAGAAGATTTTGGTCGATCCATGGCAATTGTTCCAACTGCTCCAACTTGGTCCAGCCAAATTTGAACGGGTCGTGGTCGGGTTGTACGCAATCATTAGGAAGCCGTGGTCACTGCAACGAATCGAAGGCGTCGCATGGAATGCCGTGCCGACGTACAAAATTTTCGGCCATGGGCCCCTCAACGTTTTGCTGTGCTTCAAAGGCTTCAGCTACAAATTGCGCAAAGTGGATTTTTCAAGGCCAAGCTCTAACCATAAAATAACGCGGAATCGGATGATGGTTGCCAAATTCATCGCTCCGTCCGCCGAGCACATTAAGCGTAAGGCTCAAGAATTGGTGGAAGCGCTGCGCAACACCAAACAAATTAAGCGCACGTATGGAAAGAAGAAGAGGAATAAGAAGCCAAAGCTTGAAACTTGATCATTTTGTTTTGTTCATTACGTTACAAACGAAGCGCGCGATTATTTAGCATTTGCAGAAGACAGACCCAATTATCTAATTAATGATATACCTTTGTAATTGGAAAGATTAAATGATCCATTGAC
>Hetgly06232.t1 gene=Hg228
NTCAGCCTGTCCGCGCTGGGCGCCGGTGGCGGCGGCGGCGCTGCCGGTGCCATGGTTGACCCAACACTGGCCAGCCTGAGCGCGTCGCTTGCCGCCGCGTTCGCCGGTGGTAGTGCCAGTGGCACCACCCCTTCCGCAAGTGTTGCCGCTGCACCACCATCGCTGTCCGCTTCCAAAACTGGAACCACTACAACAACTGGCAGCGGAAGCAGCAGCACGTCCGTGATAACGACGGCTGCAGCAGCAGCGGCCGAGTCATCCGCCAAACTGGACGCGCTCAATTTGAGCAAGCGCGGCGGCGGCACGAGTTCGTACGAGGACAAGCCAGCGATGGTGACGACACCAACGGCAAAAGCTTCCAAAACCACTTCTGGTGGCAACAGCTCGCAATCAGCATCAAAAGCTGCTTCCGCTTCAAAACAACAGCAACAACAACAGACAAGCGCTGGCATTGGCACCACCGCATCATCATCATCCTCAAGCAGTACAACATCCAAGCAACATGGTGGCACCAGCAGTGGGCAACGTGCCGCAACAGACACACTGGGCAGTTTGTCCACCGGCCTTTCCACGTCGGCCATCAACAAACTGAGCCAAATGAGTGTGCCGGAACTTCTTGCCTACTCAAATCTTTCGCATGACATTCGCATTCCGGTGGTGCACATTGAGACGGGCCAACGCTTTGACAACGAAAAAGCGCCGACAATGAAAAGTTTGGACCAATGGCTGAGGGCAAATCCCAAATACAATGTTGATCTGCTTTCACTGGCCACTTCTCATCCGAGCCTATTCTCATCCTCAGCTTCATCATCCAACAGCAGCAACTTGTTGTCGATGGCCAACAGTGGTGGCTCTCGAATTTCAACGCCAAAAATGTCATCATCAACATCATCCTCAGCAGTGTCACAAAAACACAATGAAAGCGTTGCTCAAAAATCGCAGCAAAAAACAACAGCAGCGGCAAATGAGCGAAATGCCGTTGTCGCCGTGCCATCTTCCTCCTCCTCCTCCGCGCCGTCGGTGACACAGCAACTGATTGAGCAGACGGCAAAGAAAAGCGCCGCCTCACAATCAGCAACAACCGCTGCTGCTGCACCTGGATCAGGATCATCCTTCTCGACATCATCGTTGTTCGGCGTGGGAGGCGGCGGCGCCGGCACCGATTTCCACGGAGGCGGCGGCTCTTCATCAACAGCAGTTGCCCAGCAAATGGCCGCAATCAATCAGTTGCTCAGTGGGCTTGCGCCAACCGGCGTCTCGGCACAGACCGCTTCACAGCTTCAGGCCACCAATTTGGCTGCCGCAACTGCGTTGGCAACGTCCGCAGCGGCTGCCGCCGCCGCCGCTTCGTCGACCAGCAGCAGTTGTGCCAACAACAGCAACAGCAATTCGACTGCCCAACAACAGCAACAGCAGCACAGCCACAGCATGAAAAGCATTGAGCAACAAATGATGTTGCTGCAGCAAACAATGGCACTGGGCGGGTTGGGCAATTCCAGCGGAGGGACAGCGAGCAGTATGATGAACCATCCGTACGCATCATTTCTCTACCAGCAGAATCCGGCCGAGCTGTTCGACATTAAAAATGGTCAGCAGCAGTCATTGTTTGGCACTGTCGCTAGTGGCGGTGGCGGCACCAGCAACACCACCAACTCCTTATCCGCCGCTTCGGCACTGCTTTCATCCGTAACACAACAACAGCAGCACAACCAACAGCAACACCAGGCTTCCTCCTCCGCCATGGTGGAGCAGCAGGCGATCGCCGCGTTGGCTGCCGCTGCGGCGGCCGCCGGCTTTCCGTCTATTGGCTCCATGGTGCCAAGCGCTGCTGCGACGACTGGCGGCTGCGGCATTGCGAAAAGCGGCGCCAGCGTTTCCGCCTCGGCATCATCGGCGGCTGCGGACATGAACGCGTTGTCGTCGGCCGCTGCCGCACTCAACTCGGCCGACCTTTATTTGGCCGCAATGGCCTCCTCATTCCAATCACTCATAGGTGGCGGCAGCGGCGGTAACGCGGCGGCGGCGGCTGCCGCTTGTGCCAATCCGTCGGCAATGGCCAACAACATTTTCATGCCCAACCAACAACAGCATGTGCGAAATTCAGCTGCTGCTATGGCCACAAATCCGGCGTCAGCAGCGCTGTCCTCATCATCCACCTCTTCTGCCTCGTTGGCCAGCATGAACGCGGCGTTGGAGCAACTGTTCCAAGCGGCTGGCATGGACAGCTCCGCGTTGATGATGGGCCTCGGTAGCATGGCGACGGCACCGCCGCCGAAGCCGGCGGCGCCATCATCATCGCTTCAGCAGCATCACCAACAACACCACAGCCAGCAAAAAAGTATTGTGACGTCAGCAGCGGCAAACATGCGACACCATCATTCATCTGCTGCTGGTGCTACTGCTTCATCATCAGTGGTCAGTGCCGGTGGTTCGTCTACCACCGGCGCCGTTCCTGCTGTTGGCACGACGCCAACAAAAACGGTGCTCACAAAGGTGGAGACGGCAAAGACAATTTCACTCCCGCTGGTCACCTCAATGACGGACGGCATAACAACTCAACTAAAACAACAGCAGCATCGTGCCACCGAAAGTCCGGCACGTAAACTTGGCATGTCAGCAATTGGTGGCGCCGGCAAGGGTCTGAAGCTGAACGCGGTGTTGGAAAAGTTGAATGCGTCGTCAAGTTCAAGCAGTACAGCTCCACCAGCCACCACCAGCAGCAGTGTTGCGACGACGCCCACAATACCAACCGTTACAGTACCTCTACCGCCAACAACACCAACAATCGCTACAGTACCACCTCTACCGTCATCATCAACTACAGTTGCTGATGTTGTTGTTGATACAGTGCCATCATCATCAACTACAACTACAGAAAAGCAAGCAGAAGCAGCAGCAGCGGATGTTGTTGAATCGGCAGCACCAGCTGTTGTTCAGCAACAGCAAACTGATCAAAAGGATGATGATAACGATCGGACGACGACTGAACCGGAGGGACCAAAGCAGCAACAGCACCAGGTGGAGACGGAGACAGTGGTGGTGGCCAATGTTGAAGCGGACCAGCAACAGAAAACGGCAATTGCTGTGCCACCAGAAACGGTGACGGCACCAAAAAGTGGCACTGAGTGTGACGGTGATGATCATGAGCATGACAACGACGATGGTGGTGGCAAACATGATGAACAAGAGGAAGAGGAGGAGGACAAGCAGTCGTCGTCGTCCAAACTGGTGATGGCCGTTGACAATGATGATGATGAGGAGGAGGAGGAAGAGAAGGAAAAGAAGAACACTTCCGCGGATGATAGTGAAAAAAAGAATGATGGTGATGATGGCAAATAAATATAGGGTAATACAATAGAAAATAAAAAATTAATTGGTCACGGTAATGTGTTTGTGTGACCAAAATTTTCAACAAAAAAAAACAACGAAAAATTGGATGATGATGCCCCCGATCTCCCCCACCCTGATTTTGTATCTGCTGGATATTTATTCCCAACCAATATGTGTGCGTGTTGGCAAATTGTGTGTAATTTTATGATGGCATTAAATTCGTTTT
>Hetgly06233.t1 gene=Hetgly06233
ATGAGCGACAAATTGGAAAACCTCCTTCAAAAACTGCTTACGGCGCAAGCCGATCAGCAAACCCAATTTACTCAAGCTTTAAATTCCTTGGTCAACAACAATCCCGACAAAGAACAGGCTTCATTGTTCTCGACAATTAATTCCCAAATTTCAGAATTCGTGTATGAACCAGAGAACGACCAGACATTTCAGACATGGTTCGAACGATTCGGCGAGTACATCACAACCGATGGCAAGCTCCTCACGGACGCGATGAAGCCTCTTCGTGCGGCGCTACGACTGTTTCAGAATGGCAAAGGCACCGAGTCAAGCAGTTTTGGATTTTGCCTCGCATGTCAGTGCCGAATGCGAGAAGTCAAAGATGCAATTGACCAAAGAAGAGATGAAGGCGTTCATTTTCGTCAGCGGCCTGGACGAGGAAGACCGTGA
>Hetgly06234.t1 gene=Hetgly06234
ATGTCAAATGGACGAGCAGAACGTTTTGTCCCAAAACAGGAGTCACATCATCAACAACCGAGGACCGATAAAAAAACGCAGCAAATGGAGGCTCAATTCAACAGGAAGCACAACACGCATGAGAGGATTTTCAAAATTGGAGACAAAGTGTTGTTCATCAATTACCGAGACAACAAGAAATTTTGGTTGTTTGGTAAAATCGTAAGAGGGTCAGGGGTCATGTGGCGAATTGAGGCACCTTGTCTGAGTGCCATCGTAACAAGGCATTCTAATCAAATGCGTCTTTTCAATCCCATTCCGTACAAGGAAACTGATCAGATTCAGCACTCTCCACAGCGTGTGGAGCGCGAGATCACACCGCCGAGAGCACCGAAAAAGGTCCAATTCGCCGACCAACAGCCTCAGCATCATGAACAGCCAGCCGAAAAAGAACAAATTCAAGAGACACCGAATCTGAGGCGTTCGACCCGCATCAGAAAAGCCCCGGACCGTTTAGATCTTTAA
>Hetgly06235.t1 gene=Hg240
AGAAAAGATACGACTAATTTTCTGTACGCCCCAACATTCCTTCTTTGTTCAAATGATTACTATGTTATTAATCACCCTCGCACTTTGTACTAATTTAAAAGCATTTAAATGCCGAAATGGCGAATCAATTGATGCGCGTACATTAGGAAATGAAAGTATTGTGGAACACTGCTCCTCAAATTCTACTGAGAATGAGCATTTGTCAGACAGCTGCGGAGCTGTTGTGTGTTTGGCTGATAAGCATGCGTATACCAGCGAACTGTGTGTCAACAAAGTCATCTGGCACCTTTTTTGCAATACAACCGAAATGAAAAAAACCGTTGAAAATGCAACCAAACTCTTTGAAAAATGGGCTTGTTGTTGCTCAACAACGAATGATAGAAAGGCAAATGATTTAGTTGAACTCGGACTTCCATCTGAGTTTCTGCCTCCTTGGTACACCACCATCGCCTCCAACACAACTCCATCGTTCTCGTCCTCTGTTCATCACGTTTACAAATTGCTGATTTCCATCGCAGTTTTTTGTTTTCTCATAATGTGATTTGCTGAAGAAAGAGAGTCAATAAACGATGTTAAAGATAAAAGCCAAAAATTTAATTTCACTGTTTAATTATCTATAAGTTAAAAATACTTTTGATAAAATATTGAATAT
>Hetgly06236.t1 gene=Hetgly06236
ATGCTTACTGCTAATGAGGCCGTTCAAAGAGACCAAGATGAGAAGGAAGTAGAAGAAGAAGAGTCGTGGGCCAAACGTTTTCCTCCATACAGTGCAGAAACGGAAATTGAACAGCTTGACGAATTTAGTTTGCTTCATCAACAAATTGTGGCCGGCCGTGTTGTGCCGTGTTCTGTAAATTTGCCAGAAATCACGGAAATTTCCGAAATTGCGGCCCAAAAATTGAACTCCGATCGGTCTGCCGGGGGCATCCCTTTGCTTGATATTGTCAAAATTATCAATGCCACAAGACAAAGCGTTGCAGGCACAGCTTATCGTGTACAAATACTGTTCAAATTGAGAAAAAAGGACTTGGGAAAAAAATCGGAGGCCACCGGAAGCGAAAAGAGCAACATTCAGGAGCGTAGCTATTCTTTAAGCCCGATTTATTTGTTCAAAATTTATCGCAACATCAATGAAACCATAGAAATCAATTACAAAGAAATCGCCAATTTCGTTAATGTGCCGGGCGGACGGTGGTGTTTGTCCACTGGCAATTTTATGCCAAAAATTGGCCTTCAATGTTCGCCAAGTTGGCGCCAATTGGAGGCGGAACAATTTATTTTGGTGGCGCTCGAGATTAATGTCATCAAAAATCCACCGAAATTTTTGCCATTGTTTGGTCTGCTGCGAACGGACGTGTTTATCAGTGTAAAGATCAACATTGTTCGGCCTGAAAACGCACAGGATTTGTTCAGATATGGACCGATTAAAAAAGAAATTGACGGCGACCAATTCCATTCGGTTTCCGATTACGCACATTTTAGCGTGAAGGAGTGCATCGACCAATTTGATGGCTACATTGACTTGTGCATGGTTCACTATGCGAAGGATGTTTCTAAAAATGTGTCAAACACTTGCTCAAATAACAGAAGTGACCGTGAAGAAGTGTACAGTGTGTTAGAACATTACATGGACATTGGCACTATTCGGTCAATAGGCGTGGCAAATTTCGACTCAGACCATGTCGAATACTTAGTCAAGAATGGCATACATTGTGTGCCGGCCGTTGTCCAATGCGAAATGCACCCATTCTTACAGCGTGACGATCTGCTTGATTACTGTAAATCCGCAGGGATTTTCCTGCAGGCCCACAGCATTTTTGCATACAAAGAACAAAAACCTTCCTACCTAAAGCAACACCAGCGCTATTTGCTGCTGAAAAGCATAGCATCATTTTACAAAATTGGCACATCGCAGTTGTCACTTTGTTTCCTCATGCAACGCGCCCCACATGTTGGAGCAGTAATTGTGGAACAAACGGATGATTTGTTTCTCACAAAAAATGGCCGTCCACGGCGTGTGATGTCATGTCAGCAGCTCAGGAAACTGCTGAACGGCTTGGTGGCCAGCGTGTGCAACAACAGCGACCACCTTGATGAGGCTGATGAGCACTACGATTACGACGACATTCCGCCAAAATCCCAACAACATCAGCAGTTGAAGTTGTTGCGCGATGAGCACATGCGCGCGATGCAACGGATGGACTTGGGCAAATTAGGCGGAGGCCGATTTACGGACTGTGAACAGTGGAAAGTGATGTGA
>Hetgly06237.t1 gene=Hetgly06237
ATGAATCTTAATCATTGGGAGGGATTGGACGCCGGCATGATTACTTTCAAAGATGGGAATGAGGTGTTAGGCGCAGCGACAGTCGAAGTGTTGCGCAGGCAGCCGCCTTTGGATCCGCTTTATACCTTTTTTAATCGAGATTTCTATTACTGTAGCGACGACGATGATGGCAAATGGGTGATTAGAGAAATTTGCTTGAACAACGATGATGACAAATGCGTCAATTATGAAGCCAATTACCGTAGCGAGGATGGCCAATCGTTCATTAGAAAAGATCGCTTAGGAAAATTGGAAATTGACACATTCATTGATTTCTCTGAGTGA
>Hetgly06238.t1 gene=Hetgly06238
ATGGTGACTGCCAGCAGCCGAAGAGCCTCGACAAAAGAGTCCAACGAATTTTTGTCCGTGTATTTGTTGCTGGTCCAATGCAAAAAGAAGGAGGAGTTCGCCAAGTTCAAGTTTTCCATTCTGAACGACAAACGGGAGGAGACCAAAAGTCGCAGCGTGCCTACCAGTTTCCGCGGGCAAAGTCAGGGGCTTCACGAACTTCATCCGCGCAACGTTTTGCTGGACCATCAGAACGGACTGCTGCCGGACGACCGGTTGTCCATCATACTGTCCGCTTTGCCACCACAGCACAGCGCCGTCCGTTGGTCAGCCGATCACAATGGCGACAAGAAGTGCGAGTGCAGCCGCTTACCCGGTGGCCACGCCTCAACTGATCGTGGGCACGGCGGGTGCCGGCGGTGGTGGCAAAATGCCGAACGCCGCCGTAACCGCGAAACAAATACAGCAGCAACGGCACTGGCAAAGACAGCAGCAAGAGCAGATACAGTGTGTGTGCGTGTCCTAATGTTTTTCCGTTTGCAGCACCACCATCCTCCGGGCAACATGCTGTCAACGACGCTTCACCAACAGCAGCAACAGTTCAGTGCCGGAAGTGACGGAGGCCCATTCATAAGACCATCACACCAACAGCAACACACGCCATGGTGCCGCATGCTGTCGCTGCAATTGGCCAGCAGTACTGCGGCGCCAACGCGGGGTTCGAATACCCGCCAATGA
>Hetgly06239.t1 gene=Hg242
GACGACGACCCACTTTGCGCCGTTTGCTATACCAGAAAAGTCGTCAGCGTTTAATGCAAAACTAATTTTGGATATTTTAGAGAAATTATGCATGCATTCCATGTGGTCATCGTGCCCTCTGCAACCGATGCGCCGAAACTGTTTCAATTGATGGGCGTTGCCCCTTTTGCCGTGAAGAACTTATTGGGGTGTTTAAAATATTCAGTCCCTAATTTTTTTTGTGACCGAACACACACACACATTGTTGATTGATGATTTTTCTAGAATTAATTTTAGCACAAAATAATAAAATAAATTATGTTTGTCTGGATGGCCTAATGGTTAGTGTGATGGGATGACTTGTCAAAGTTCGGATCCCCTAGATCGCTGATGAATTAAAAGACAATATAATATGTTTGGGACAAATGGTCGACAATAGGACAAATGGTCTAGGACAAATGGTCGACAACTCGGGGGACGAAGGCCATTTGAGCGCCAACTGGCGCTCAAATGGCCGGCTGAGCGCTGGGACTGAAATGTCCCGGCGCTCAGATGGCCCCAGTTACCTGACCTTACACTACTATTAATTATTAAGAAGATTTTAAAATAGTAAGTTTTAATTAAAAATTTAATTCGATTAAATATTTTTTTTGCAAATTTCTGAAAAATTTACGATTCGGATTTTGATTTGCAAAAAAAAATCATCGAAATTTTGATTTTAATAAGGTGTTTTTTTAGAAGAGCAACATTGATGAGCGTAATTATTCTTTAAGCCCGATTTATTTGTTCAAAATTTATCGCGACATTAATGAAACCATAGAAATCAATTACAAAGAAATAGCCAATTTCGTTAATGTGCCGGGCGGACGGCGGTGTTTGTCCACTGGCAATTTTATGCCAAAAATTGGCCTTCAATGCTCGCCAAGTTGGCGCCAATTGGAGGCGGAACAATTTATTTTGGTTGCGCTCGAGGCTGGCATCCGATTGTTTGACACACCGAAAATTCTTTTTCGGCCTGTTGTTGCTATTCGGATTAATGTCATCAAAAATCCACCGAAATTTTTGCCATTGTTTGGTCTGCTGCGAACGGACGTGTTTATCAGTGTAAAGATCAACATTGTTCGGCCTGAAAACGCACAGGATTTGTTCAGATATGGACCGATTAAAAAAGAAATTGACTGCGACCAATTCAATTCGGTTTCCGATTACGCACATTTTAGCGTGAAGGAGTGCATCGACCAATTTGATGGCTATATTGACTTGTGCTTGGTACACTATGCGAAGGATGCTTTTAAAAATGTGTCAAACACTTGCTCAAATAACAGAAGTGACCGTGAAGAAGTGTACAGTGTGTTAGAACATTACATGGACATTGGCACCGTTCGGTCCATTGGCGTGGCAAATTTCGACTCAGACCATGTCGAACACTTAGTCAAGAACGGCATACATTGTGTGCCGGCCGTTGTCCAATGCGAAATGCATCCATTCCTACAGCGTGACGATCTGCTCGATTACTGTAAATCCGCAGGGATTTTCCTGCAGGCCCACAGCATTTTTGCATACAAAGAACAAAAACCTTCCTACCTAAAGCAACACCAGCGCTATTTACTGCTGAAAAGCATAGCATCATTTTACAAAATTGGCACATCGCAGTTGTCACTTTGTTTCATCATGCAACGCGCCCCACATGTTGGAGCAGTAATTGTGGAACAAACGGATGATTTGTTTCTCACAAAAAATGGCCGTCCACGGCGTGTGATGTCATGTCAGCAGCTCAGGAAACTGCTGAACGGCCTGGTGGCCAGCGTGTGCAACAACAGCGACCACCTTGATGAGGCTGATGAGCACTACGATTACGACGACATTCCGCCAAAATCCCAAGAACATCAGCAGTTGAGAGTAGGCACTGCTTTGACAAAAAAAGGAGGAATGTCACGCAAAATCGGGGCCTTCAAAATGTCCGGGGATTTCCAATCTGACACTGCGCGCGAATATAAAAATGAAGACGACGATTGAGGGAAGAGACTGTTATTCAAAATCAAATCAACGGTGCTATGTCGATCGACGAAAAGTGCAAATTTGGTGTATCGAAAAAAGTGCAAAATTTGCAAAGTTTATTTTTACTAAATTAACTCATAACTTCGCAACTAAATTGCACAATCTTGGTATCATACGATAG
>Hetgly06240.t1 gene=Hetgly06240
ATGCCATCCAATTTTCTCGAAAATGACATTGATGAGGAAACCATCGATAGCAGTTTCGATTTTTCTCGTCCCTATGGCCCAATACATTTCCCGGATTCCGACTTGACCGCCCCAATCTCGAACGATGCATTGGCGGAGTTTAGCTCATGGCTTAGCGGAAACCGGGAGGGTCGAGGTGGCTTGACACCACTATCTGATCTTGTGCGGTTTGAGACCACGAACGAGGAGACTGAGACGTATACCAACCAACCGATTCAGCCATACCCCGACCAACCGATTCCGATTCAGATTGGAAATCGTGCGGACCAAGGGTATCTCAATGAGCCTTTTCGTGGCAGACGGGTGCGCAATAACAGGAACTGGCGCGGTCGCTTTAACCGCCAGAACAACCAATACTCGGGTAGCAAATTTTGCACGCATCCGGCCAATTCCGCTAAATCAAGCACCAGATGGCATGAGACAACTGTTCAACCCGGCTCCCCCACCTCCGTGTTTTATGTGTTTAGAGGGCCCGCCCACCTACTGAATGACCCTTGCCTGTTTGAGCGCGTTAACGGGGGTACGAATCCACAAATTCCGCCGATGGGTTTCCAATATGACCAAAACGGAGTTGCGATTTTCAACCCGGCCGTTCCACCCCCGGATACGAGAACCTTCGCCCCCGGGAACATAAATGCCAATCAAACAATTGGACGATTTTAG
>Hetgly06241.t1 gene=Hg243
TGCCACCCTTTTCCATTACGAATGAGCCGAGTCCAATACAGTGACATTTTGCCACTGAAAGCAAATGAAATATTCAAAAATGTCCGTGGAAATAGAAACTACTGCTGCATGTTCTCATCAAAAATTCCGACAAATTGCCAGCGGCGCCTATCGTTAGAATATGAAGTGGGCCGAGACCAAGAAAAACAGCAAATCTTGGAATGCTGACCGTAACTGTGAGCGTACGTCACGGGGCTAAGAGTAGTAGTGTAAGGTCAGGTAACTGGGGCCATCTGAGCGCCGGGACATTTCAGTCCCAGCGCTCAGCCGGCCATTTGAGCGCCAGTTGGCGCTCAAATGGCCTTCGTCCCCCGAGTTGTCGACCATTTGTCCTAGACCATTTGTCCTATTGTCGACCATTTGTCCCAAACATATTATATTGTCTTTTAATTCATCAGCGATCTAGGGGATCCGAACTTTGACAAGTCATCCCATCACACTAACCATTAGGCCATCCAGACAAACATAATTTATTTTATTATTTTGTGCTAAAATTAATTCTAGAAAAATCATCAATCAACAATGTGTGTGTGTGTTCGGTCACAAAAAAAATTAGGGACTGAATATTTTAAACACCCCAATAAGTTCTTCACGGCAAAAGGGGCAACGCCCATCAATTGAAACAGTTTCGGCGCATCGGTTGCAGAGGGCACGATGACCACATGGAATGCATGCATAATTTCTCTAAAATATCCAAAATTAGTTTTGCATTAAACGCTGACGACTTTTCTGGTATAGCAAACGGCGCAAAGTGGGTCGTCGTCATTGGAACCATCCATATCTCGTAATTCCAATATTTCTTCTCTCAAATCTTTCGTCTCGTTGACCAAAGTTGCCTTTGTCTCTCTCAACACACTTATTTCTCTTATTAATTGTTCCTTTTGTTGTAGCAATTCGATTTTTTTGTTATGGATTTGTGTTTTCCTATTTTTAAGATGATAAACATCTCGTTGCAGTTGGTCCTTGTCGATTTCTAACCCAATGATCATCGCTTCAAGCCGTACAATTTCGAAATTAGCAAATGGTTGGTGGGACATTGATTATTTTTCCGTGCTAAAAAAAAAAGAAAATTATATGATTAAATCGGGGAGGGATAAAATGGGTCAAATGTGTGCAACATCTCTATATAAATAAACAGGAAGTTGCATTAACATATGCATAAAAATGTTTATTGCACCATTCACTCTAATTTTGTCGGGGGCCACTGGTAGTGGCAAAACGCAATGGTTGATGAAATTGTTGAGAAATTACAAGGAACTAATAGACCCGCCGCCTGCAAAAATTCTGTATTGCTATTCAGAGATGAATGAGTCGGTTCTTGATCTGATGAAGCGGGGAATTGAGACGTACAACGGTTTGCCAGACCAAGCGTTGATCCAGAGCCAGCCGAAACCACTGCTCCTCGTGCTGGATGATTTAATGCTGAACGTGGGAAGCGATTTTCTGGATCTGCTGTTCACACGCGGTTCACATAACTGGAATGTCAGCGTTATTTTTGTCACCCAAAGCCTGTACGGGCGTAACATTAGAACAGCGCGAGCTAACAGCCATTATTTGGTGCTGACAAGGAACCCGTCTGGTCAACTCCAGGTCAGAACGGTTGGGTCACAACTTTTCCCAAAACGACTCAATTACTTTATGGAGGCGTACAATGAAGCGACTAGTCAGCCGTTCAGCTACTTGGTTATAAACATGCACCCAAATGCTCCGGAAAATGAGCGGTTGACAAGCAAAATATTCCCCGGGGAGAGCCGTGAGGTATATTTACCTGTAGAATAAGCGTAATGAACGAAACAAGTGCGCTAAAAAACTATTTAAGGAAGGGAAATTTTTTTGGTTCGCAAAATGTACGAGTTCAGTCCATACATTCGCGCAAATTCGGATTTTTTCAAAAAATTAGCCTCAACAAAATCGGATAAAAGGAAAAACGATTTGCTGAAAGGCGCATCCGTAGAACAAATTCTCGGATTGGTTGAGATTTGTGCAAATATTTTAAAATTTAACTTTCGCCTCAACCGGCGACAGAGGAGACGATTGGCCGTGTACGCAGACTATTACCGAGCAATTGCACGTTCACGTAGTGAGCGCACAGCCAGACAGAGGCTACAACAGGGCAGCGGAATAGCTTTAGGAGCTATTTTGGCGCCAATTTTGAGCGTTTTAGCTGAACAGCTGGTCCAGAAAATTGTTGCAACTCCATCGGCACAACAACAACAAAATGAAGCACACTAAAAAG
>Hetgly06242.t1 gene=Hg244
ATGCTACTTGTACCGGAGAGTGAATATTTGGCGCTTATCAACCTGCTGAAAGGGGGCGCAGGTGGAACGGACTCACTTCAAGCCGAAAAAGCAGCGATCGATGCCAGCATCCAAAAAAATCTAAATGACAATAAAACGGGTGCGGACGTGAAAATGAAACGCCACTCGTGGTTGTACAAACAGAGGCATCAGCTCAAGGACATGATTGAGAACAAACCACAAAAGGTGATTGTGGAAAACGCTACAGGCACAGCGCCACAAAACATTGCCCCGTATATGGGCATACAGAAACCAAACCTCAACAAGCTTGAAGAATTGAACGGGCAGGATGGCAAAAAAATAAATAAAAAAATAGGACGAAAATCGGTCCAGGCTTCCAGAATTCAAACTCCCAATGGTGCCAGCTTTGGTGAAGAAACGGATACGTCTGCGTCGCCGGCAAGTTACGCTGGTATTCAAAAAGTATTGAAGGAAGCGAAGAAGCGAAATCCGAGCATTACTCTTCGTGATGTTGACCATTTTTTGCATAAACAGCGCACCTACACGTTGTTTAAGCCGCGCAAAAACCGCTTCCGCAGACTAAAAACTGTGCCTAGCGGACTACACACGGACTGGCAATGTGATTTGTGCATCATGGACGCGCTGAAAGAGCATAATGATGGATTTCGTTACATCCTTGTGTGCATAGATGTGCTAAGTCGGAAGATTTTCACTGCAGAGGTAGAGTCCAAAAAAAGTGAGCACATGATTGCGGCATTTGAGAAGATTTTCAATAAGGCAGGTGTGCTGCCCAATAAGCTGTACAGCGACGCTGGGCTTGAGTTTCAGGCAAAGAAAATGATGGACTACTGGAAACAAAAGGAGATCATCAAGCACGTGATGTACAGCCCACATTTGCATGCTGGAGTTGTGGAACGCGCAAACCGTACGCTTAAGGAGCGACTTTACAAGTATTTTAGCGAAAAGAACACAAAGCGGTGGGTTGATGTGCTGGACAGCATTGTGCGTAACCTGAACAGCTCTGCGAACCGAACAACCGGAGTAAGGCCAATGGACGTCAACTTTAAAAATGCCGCTGCTCTACGGAATCGCCTATATAAGCAAGATCCACCTTCCTACAGGATCCGTGATCAAGACGGGGAAGACATTAAAGGGATTTTTTACGAGCAAGAGCTGGTAAAAACCGTTGCAGAAACAGCGCATAGAGCTGAAGTGCTGAAGACTCGACGCAGAAACGGCGTCAAAGAACACTTTGTGAGTGAGGTGTATCAGCAGCAGCAGCAATTTTCTTCTGGCCATGATGGAGCTAGCCGGACGAAACGGCAGGTCACCACAGACCTATTTTTTCATGAAAATCCAGTGGATTATTGGGAAAAGATTGGCGAATTACGCACCAAACAAGAGCAGTTTGAAAAGGAGGTAAAACAGGAGGAGAGTGAACTTTCGGCAGACACTACGGATGTGGAGAGGAAAAAACTGCTACAAAGCGAGCTTCCACTCAAACGGATTCGTATGCAGAGGAAAAAGTATGAGCTGGAAGAGTTGGAACGCGCTGCTGAACGTCGTGATCAGGAAAGTCCGGAGAATGAGCAAAGAAAGATTAGCGATTTTTTCCAACATCATCCCGAAGATTATAACAAAAAATTGAACGAGTCAAGACTTATATTCACCCAACATCTCTCGGGGCTGCAAGAGGTGATGAGCAAGTACATTGGTGAAAAAGATATAAATAAAATTCGTCAGCTTAACACCGAGGTTGGCAAAATACGCACAAAAATAAAACACATGCAGCACAATTTGGCCATCTTTGAAAATGCTGCGCTTCAGCGTGACCACCAAAAATCTTTGTCGGAATATGAGGAGCTCAGCCACCAGCAGAATAGTGCATTTGTTGAGGAATTTTTTCAAAAACATCCCACAAATTATTGGCAAATTATTCACAACAATTATAGGGGTCTTACAGAACATTTTCAGAAGATAGAACAACTGCAAGCAAAGGCAGTAGGGTTAAAGGATAATGCCTCTTTCGAAAAGCAGATTGAGCGAGCAAAACAGCTGATTGAGTACAGACGAAAGAGATTCGCTGCGCTTGAATTTGAGGCAAAAAAGCGTGATGAGCAACAACAGTTTGTTGCAGCATCAGCAAATACAATTACTGCACCGACTGCGTCGGCATTGATCGGAAGGGAGGCGTTAAAAAAACGTACAGGCATCTCTGCCAGTACGGATGGTGAAGTAGGTGATAAAGCAGATGTCGGTCCACAAACAGCTACCACAACAACAACACATGGGGAGGCATTAAGAGAGAAAATATTGGAGCAACAAAAGCATATGGATGTCGGTCCACAAACTGCTACCACAACAACAACACATGGGGAGTCATTAAAAGAGAAAATACTGGACCAACAAAAACACATGGACAACGATGATACAGCAGATGCCGGTCAACAAGCAGCTACCACAACGCATGGGGAGGCAGTACCAACAAAAACACATGGTGAGACGTTAAAAGAAAAAATATCGCAAGAGCAGAAGCACCTAGTTGACGATAAGTCAAATTCTGCCGATGCAAAACAAGATGATGGTAGCGGTACTGATGAGAAAATCGCGCATGGTCAAACGCTAATTGACCGACTTAAACAGAGCGAGGAGCAGAAAAAAGAATGGGGGGACCCACCCCAAGATAATGATGATGATGGGCGAGCGCCGAAGCATGGAGAAATGCTGTGGAAACTGTTGCGATCAACGGTGCCGACTAACCAACAGCAAATGGGCGATGTCATCCACCACCAATTTGCTGATGCTGAACAAACCCGTGGACAGGTACTGATGGAGCTGTTGAAAAACATTTTAGAAGAAAAAACTGACACTGCGGATGCACAGCAAAATTATCACCATCTACAGAAATCAGCCCATCTTTCTTCAACACTGCGAAGAGGTGAAGCGTTGAAGGAACTGATTAAAAAAACACAAAATGAACCTTTGCATAAATCCTCTGCAAAAACGCGAGGAGAAATTTTAAAGTTGATGTTGGAACATATGAAGTTTTCCAGGGAGGAGGAGGTAAGTTTTGAAAAACTTGTCGCCAAGCAGCAAAAAGAGTCAACCGCTGCCGAGTTTGTGTTCAACGATCTTGCACAACGATTTGTTCTGATAACCGGTGCGGGCGTTCTGCATGTGGATGTAAGTAAGCATCTTGCATATGTGCTCGGCTTTGACAACACTCGTCTGTTTCATGGGGAACAGGCACGCTATATGCCAGATCTGTCTGGTGGTGTTAAACAATTGTATGTTTATGCTCCAAAGCTTATTGAGGAGTGTATCATAGGTGACCGAATGGCGCCTCTGCTTAGGGTGGTCAATGTTTCGGCCGCACCTGCCAGTGGGGGAGGGACGGACGTGCCTGAGAACGCATTTGGACGATACGTCAAATTTAATTGGGGAACCTGCATTGTCACTCTGCATTTTAGACGGAAATTATTTTAAAAAATATCAGCAACAAAATGACTCACGTCACATTTAACCCGGATAGCATTAACTGGGGACCTCTTCTTGCTTTAGAACAAGTGGGAGGGGGAGAAATGCAATATTTTGTTGGTACACGGCATCAGCGTGGTGCTGGTCTATTGAGAAATGTTGCCCGCTTCCTGATGCCGGTCGCTTCCAATATGCTGAAGGCTGTGTCACGCGAAGGAGTGACTGCCGGAAGCCGGATTATGGAGGATCTTTCGCAGGGAAAGGCCCTCAAGGAATCCATTCAGGCACACGCAAAACATGGGATGGAAAACCTGGCTGAAAAATTGAAGCAGTGTGGGAAGGGAGCCCCTACAAGGAAGAGGAAGAGACCGGTGAAAAAGGTGAAGGTGCCATTGCCAATGCATTCGTTGAGAGGCAACAAAAGACAGGCTATAGACCAACTCACATTTGCGCCTTAAATTAGACGGTAGCGCGCCTGTCAAAGGGCACACACACACACACATGAAAATCTATAAATAGGCACGTAAATGGATGTTCTGTCTACTTGACGTTCACTTAATAAATTCAGTGGCATAAAACTAACAATAATGAGCGTAATAAAGAAAATTGACAAAGACAGTGTTGAAGGCCTTGAGGGTAGCCTTTCACTGTTTTCTCTTCCGCCAACGAATGTGGCGATAAATAGGACCAATGTCCGCGAATTGTTGCCCTTGTCGGCACTTAATCAGACCGGCCCGTATCTGTTCCGTTTGTTCTCGGACAGTCAGTACTGCGACTTGAGCAAAACATACATGTATTTGCTCAGCTCTATTGAGCGCAAAAATGCCGCAGGTGAATGGGTTCCGACCAGTGATGCGGAGCCGGAGGATAAGCGCGTGGGTGTAATCCAAAACTTTGGCAGCAGCTTTGTCCGCTCACTGAAAATCAACATTTCCGGTATAGAAGTGTTCGACAGCTCCATTTATTACCATTACCGGGACTACATAATGAAGGAACTGGGCTACTCCCATGAAATTCGCAAAGCTTTCCATGAGTCGGCGTGCTATTATACCGATGAGGATGATGGACAAGACAGTGCCAGCAACGACGGCTTCATCGCCCGTGCAGCGCGATTCTCTAACGGAAAGCAATGCGAAACGATGGTGAGGCTGAACTTTGATCTTGCACATCAGAGTGCATTGATGTTGAACAACCAGGACGTGATATTCACCATTCATCGTAACAGTGATTCTTTCCTCCTGCTTACGCCCCCCGGAAAGAAAGCAGACGGAACATTGCAGGAAAACAGCAAGGAATACCGTATTCGCGTGCACGATTTGCGTCTGTATGTTCGCACCGTAGACGTTACGCCTAGCCTTAACCTGGCAATCAGCCGTCAGTTGGAGTCAACCTCAGCCAAATACCCGCTGCGTAAGATTGAGATGCGCTCCATTTTTCTGGGCAAAGGCAGGACTGAGTTGGCTCACAACGTGTTCACTTCAACCTTGCCCCGTCGTCTGATTTGCTGCTTTGTCTCTACAGACGCTTATTCTGGCGATCGAAAGTTATCGCCCTTCAAATTTGAACACGCTAATGTTCGAGCGATAAGTGCGGAGGCCAACGGTCAATCTTTTCCCAGCACCCCATACCTGCTGTCGTTTGACGGTGCACAGCAACGTTTTGTGCGCGCTTTTGTCGACATGTACGCCGGTCTTGGTCTGGATGATTCAGACACAAAAACGGTGTCCATTGGGATGCAACGCTTCCTCAGCGGATGGGCCTTCTTCGTAATCCCGATGACCTCCACGCTGGATGATACGCCCGGCTTTGAGTTGATCCGTCAGGGCACGTGTACGCTTAAGGTCCAATTTGAAAAGCCTATAAAAGAGGACGGTTACGAAATGTTGATCCTTGGCGAGTTCGATTCTGTCCTTTCCATCAACGCTGACCGAGTGTTGAGCACGGACGGAAGTGTTTAAACAGTGGAGAAAAAAAGAGATAGATATGAATTCGGCACAAATAGAAGTGCTACTAAGAGAATGCGCGTTACAAGCGGGAAGTTCATTGGAGTTTATCCATCCAACAAAATACCGTTTGTTCTTGAGAGACAGAAACGACGCGCTACCCCCACTGCATGGTAGTAAACACAGACAGGGAGGGAACACGCGG
>Hetgly06243.t1 gene=Hetgly06243
ATGTTTCCGTTTCGCCAAATCCCTCCACCCTTTGATCCGCGCATATTCGTTCCACAGATTCTTTTAAACATTCGCCCTCATGTTGAACAGCTTGTCAACTATCGTGTAAATGTGCATTTAGCGCAAAATTTAGCTCTAATTGTTGATCAATTTGTTGATGCCAGAATTGGGCATCACATACGCGAGGCGATGGAGAATTTGCAACCACTTTTGCAAACAATGCTTCAGGTGCCAGCAGCTGAGCCTGGGGATGAACGAGCAGCAGCTGATCATGGAGCAGCTGAAGTGCCGCCGACGGGCGCCGTGCCAGCAGCTGAGCCTGGGGATGAACGGGCAGCGCTGATCATGGAGCAGCTGAAGTGCCGCCGACGGGCGCCGTGCCAGCAGCTGAGCCTGGGGATGAACGAGCAGCAGCTGAGCCTGGGACAGTCGAAGTACCACCGACGGGCGCGGGTTGTCCCGTGTGTGGCAGACATTTTGCCAGCCGACACAACATGCTCAAGCACCAAATTGTCCACACCGAGTGAAGTGCGCAAACACAATTTTGTCGTACACCACCAATGA
>Hetgly06244.t1 gene=Hetgly06244
ATGAAAAGTCTGTTCCTGCGCGTCGAAATCGCCGATCGTGTTCTGCCGGAGAGCAGTGTTGCACGATGTTCTCGTACGTGGGCGAAAATTTTGGTGTCACGACACATCACAGAGTTTGTGCTGAATGCCAACGTTGAGGAACCGGACTTAGTCTTGCGCGGCGCATTCCAAATCCTTATGGAACGGGCAATCCAAAATGCAGAGCAGCAAAGTGGCCGGAAAGTTCTCAAAATTGGTGTTACGCTACAGGGAAGAGCTGATCAACAGCCACAACAGCAGAATTTGGCACGACTGACGCTGATGCAGGATTTTTGTGAAACCAAAGAAGCTTTTCGCCGTCTTATCATCAATCGAGAGTTGAGCACCCGTGTGCAAAGGAACCTGGCGTAA
>Hetgly06245.t1 gene=Hetgly06245
ATGGCGCAAAATGCACAGCTTCAAGGCTTCAAGAAAGTCATAAAAAAGGGAGGGGTGGATGGGTCACCGGCGCTGAGCTCAGCACTGACGAAGACGAAGATGACAACCATCATCGTCAAAGAAAAAGCGGAGGAACAACAACTTCAAGAAGTTCAACAACAAAAAGACCTAAACGACGACGGCGAGCAGTACAACAACAATGACGAGTGTCAAACATGA
>Hetgly06246.t1 gene=Hetgly06246
TTTGAGAATTGGCGGCGTCGAATTGGTGGGCGCCGAACTAATAATGATCAAACAAAATATGAGAGACGAAATCACTCAAAATCAAACAACACTGAAAGCAATTTTGACGAAGAAAAAGAAATAATTAAAATCACAAATGCCCTGATTACCAAGAAAAACATATTTGGCAGAAGTCGGAGTACAAGTGTAATTGGACGATTTTCTAAAGAAAAATTCGCTAACAATCCGGAAATGCCAAAAACAATGGTGAAAAATGGAGCATATTCGGCGGAAGTACGAAAGTCGAAAACATTAGGCGACTATTTGAATGAGGCCCAGTAATTTAGGAAATAAATTATTTATTTTAGATGATTATGAAAATTATAGCAAAT
>Hetgly06247.t1 gene=Hetgly06247
ATGTCTGCCCCAATTCGTTCGGTTCTAACTGTGGCAGTACAAAAAGCACGACAGAACCTGCAGACGGCCAATGATCTGTTGGCCAACAATGGCGCAACTCTTGTTGATCTGGCCAGCGCTTCTGAAATGTTGGGAAAAAATTCAGACACAGTTCAAAAGCAATTAGATAAATGGAGTACACTCTTGGCTGGATTAGCCGGGGCGGCCAAAATTACGGAGGAAGACATCTTTACTCAGTACAAACCGGGAGGAGATACCCCGGGGGAAATCATTGTCATTTTATCGGAGACAATCGGACAGCTTGACATGCGCACTGATCAGATCCGTGCTAGTCAACCGAATCGTCAGGCAAATCCGAACGGTGTCAACCCCGCCCCGCCGAATCACCATCATCATATCCCTCTCCCCCCAATGAGCTTAATGGATTTTGACGGTACTCCTTCGCGTTATGAGCAATTTTGGGCAAATTTCCGCGATAATGTGGATCAGCGACCTGATTTGTCGCCTGCTCAGAAATTGCGTTACCTTATGGGCCAATTAAAAGGAGCAGCCCGAGATTTGAGCATAGGTTACCAAATAACGGATGCAAATTACCCAATAGTTAAAGAAGTACTCACAAACCGATTTGGCGATGATTTTAAGCGCGCGCACGACCTGCGGAGCGAACTTTTCCACCTTCCCAAGGCATCCGCCTCCACCAATTCATTACGCCTCTTCTCCGAGGCGGTGGAGCGCATTTGTCGGCAACTTAGTTCTTTAGACCCCGCCATAAATGATTCCCCTTATGTGGTGACGGCCCTTTTGGACAAATTGCCCCCTGAAATTCGCCTTAAACTCCTCGAACAAGAGCGAGACTCCGGCTCGAAATGGACAGCCAAGCAATGGCGTGATGGCCTGTCAAGCCTGGTTCAACTGCGAGAAGCGGCATACATGGATCGGGAGATTGCCCGTCCAACCGGTCAAATCGCCCCACAGGCTCAGCACCGTACCAACGGACGCTTCATGGCCCAAAATCAGCCACGACGGGCTTTTCCAGTTGTCACACCCTCCAAAAAAGGAGCAGTGCAACACCCCCTTCCGAACAAACCTCAGACCAACTGTTCATTATGCGAAAAGGCATCACATAGGCCTACCGAATGCCCCGCATACCCAAACGCAAAAAAACGACAGCAACGGCTGACGGAGCAGGGCAGGTGTCATCTCTGCATCAGAAGTGGCCATGAAATGGCTGCTTGTTCAGCCACCACAAAATGTTTGTGGTGCAAGGACCGTCACCATCTTATCGTCTGTCAAAAATACAAAGGCGAATTGGAGCCCGTCCATCAAATTTCTCCGGCCATTCAATGGCGGTACCTGTTGCTGCTGCTTCTGTTGGCCAGAGAAAGGGAAAAATTCCTCTTTTTGATGATGAAGGCCATTAAGCCGTACAACCACAGAGACCCTTTGGACCCAGTCTCCGCACCGACATTTTTTGACCCGGGGACTAGGGAGGATGGCGGATGGGAAGAAGTTTTTTTGAATCAGACAGAGAAAATAACGTCGTCCATCGACTGCCTGATGACACCAGCAAATTCCGAGGATTCAGAAAATCCATTGCCATGCTCCGTCAAGCCAAGAATCATGATCGGTGTCAGAGATTTTTGGCGTTTTATCTTGGATTGGGATGAAATTCGGCCCGGAATTTACAGAATCAGAACCGTTTTTGGTGTCATTTTTGGAGGGGAAGATTGCGGTGTCCCCGAGAAAACCTCAAATCCGTCGTTATGTTGTCCAGTCCTCCACACACCTCATCCCATCGAATCCGATGTTGCCAAACTTTGGGCTTTAGAAACGATCGGTGTTTCCGATTCTCCAATTTTAAAAGATGACGAGGTGGCGCTTGAAAAATTCAACAAAACCATTAAAAGGGACAAGGAAGGACGGTATGAAGTGGGCCTTCCCTGGAAGTCAGAGACGGAATATCCGCCTGAAAATTTTCGAATCGCCTTTTCGCGATTTTCCGCCCTGGTGCATAAACTTCGCAATTCACCGCGTCTTTTACAGGGATGCAATGAAATCATTGAGGATTATTTAGCAAGAGGAATTATTGAAAGTCCAAATTTGTACCCCGATTTAGCGGGCAAACTCATCCAATTTCGGGCGACCGCCCACCCAATTTGGGCAGATATAGAAAAGGCATTTCTAATGGTCAGCCTAAGGGAAGCGGATAGAGAATTTTCCAAATTTTTGTGGGTCAAAGACGTTAATGCACCACTGTCCGGAAATAATTTGCTGGTGTATCGTTTCCGGCGGATCACTTTCGGGATTGTGTCGTGCCCCTTTTTACTAGCGGCCACTTTACAACATCATTTGGACACATCGCCGAGTGATTTGGCCAGAGAAATCCGGCATAAGTCACTTCTATACGTGGATAATTTGTTGTTGTTGGCCGATTGCCCAGCCGAAGCCGAACAAAAGGCCATCGAAGCGCAAGAAATTTTTTCAGAGGCAAAAATGCGCCTCCGAGAATTTGTCGCGGCCAAACCTGAACTTCTGACGACAATTCCAAAAGAGGATTGCCTCTCTGAAGACGAGCCATCAGTGCTTGGTCTGAAATGGATTTTACAGTCGGACGATTTGTCCCTGCCATTTCCCGAAGTACCAAACCCAGCGCAAACCTTTGGCCAGACGAATTGA
>Hetgly06248.t1 gene=Hetgly06248
ATGAAGCAAGCGGATGTGCGAGTGCCTTATGAGCAGGACAAGAACCCACGAATCCGTCGGCACAAAAACTGGATGCTCAAAATCTTTATCTCCAATTCCACAGAGCCGAATCGTAAAACGACGAAAGCAGTGCCGAGAAGTTTTCGCCCAGAACCAAATCGGTCGAATTCGAAAATGTCTGGCCCAATTTTCACAACGGCGACCACAACGGGATCGGGCGCTGAACTTTCCTCCGGTGGCAGAATTGCCGTCAATTCGTCTGGCCAAAGGTTTGCTGGTTTTTCCAACCATTCGGGTCCTTTCCACCATATTTTGGCGGATCGGAGCTCATTTGGACTGGTCGGGTGGGTTGCCAGGTCGGCAGGGTTTTCAGCGGAACGAACATAG
>Hetgly06249.t1 gene=Hetgly06249
ATGCCTGTGGCGTTTGGTTGTGTGGATAAAAGTGCAGCGGAGAGTACAGGTGCTGATAAAACTGCTGTTCCGCTGAAGAAACACAACACCAGCAGCATCGTTAGCCGAGTACTCAGAATTGCGGCCGAAATTGTTGGGCGAGGAGGGCGTTCTGCCCATTTGAATTTCTGCCGAAAGTTGCCACGGGGTGGCTCTTTTGCCCATCGGAACTTTTCTTTTGGATTTTCTTTACCGACCGATTCTGAAATTTGCTCGACCACATCCATCAGATTTCCCTCTTGGGGATCTCCCGGGGGGCGCGAAAGAGTCTCACACACAATCCCGGGTGGTTCTTCTAATGGCACCAATTTCGAAACGGGACGGGACAATACCCGTCCATTTGCCATTAAAATGTTGGCACTCCGAGGGTACTCCTGTGACCATTTTTCCCAAAACTGCCGAATTGATTTTGCTGTCCCCCACCATCGGGCGGCTAACTTTTCAGCTGTGGAAGGTCGAAAAACTTCGTCTGACATGTCCGGCTCATCAAAAGCGAGGTTTGCTTTTGGAGACAAAAAATCGATTGGTCGCAATGGAAAAAGACCATCAGCTTCATCTGAGACGAAAGTGATGGGTCGCGAATTGATCGCGGCCTCAACTTCAGTCAAAAAAGTGCTAATTTCCTCCCATTTTAAAATTCGGCGTCCCAAAATTCGTCTGAAACAATTTTTTATTAGCGCGTTTAAGCGCTCATAG
>Hetgly06251.t1 gene=Hg255
ATGCGTTCGGTGGTGGTGGTTGTGCCGCCCACCTCGCCACCAGTGGGGGGGAGTACGCCTGGGACCGTGGCGAAAAAGCACCCGCCGACATCACCAAAAAGGGGCCTGTCCCCTGGTGCGCTCCCAGGCCCATCAAATAGGGGCCTGCCCCCTCTGTCCCCGACTGTCGCCATTGCCAAGCCGAAAGGAGGGAGCGCCCTCCACCGAGGGCAGGGAATCACGGGCAAGGGCTTTCTGGTGTTCAACGCCCACGACGGGACTCCTCGAGAACTGTCGTCGGATGATGAAGACCGTTTTGGGGGAGGCGCTCGGGACCATCCTCCGCCACCAAGCCGCCGTCCCAGCCCAAAGAAAAAGAATTGGGGGCGCCGCTGGATGCGCCGTTGA
>Hetgly06252.t1 gene=Hg256
CGGTCCCCCCTCCACACCGCCGATCAGGCGGTCACCTCCTCCACCGCTGATAAGCGGTCCCCCCTCCACACCGCCGATCAGGCGGTCACCTCCTTCACCGCTGATAAGCGGTCCCCCTCCACACCGCCGATCAGGCGGTCACCTCCTTCACCGCTGATAAGCGGTCCCCTCCACACCGCCGATCAGGCGGTCACCTCCTTCACCGCTGATAAGCGGTCCCCCTCCACACCGCCGATCAGGCGGTCACCTCCTTCACCGCTGATAAGCGGTCCCCCTCCACACCGCCGATCAGGCGGTCACCTCCTTCACCGCTGATAAGCGGTCCCCCTCCACACCGCCGATCAGGCGGTCACCTCCTTCACCGCTGATAAGCGGTCCCCCTCCACACCGCCGATCAGGCGGTCACCTCCTTCACCGCTGATAAGCGGTCCCCCTCCACACCGCCGATAGGCGGTCCGCTTTACATTGCCGAAAGGCGGAGTTATCACACCGCTTATCCGCGGTTTTGTATTCTTATTATTCTATATTTAGTGCTGCCATGAGCACGAGGAGCAGACAGAATTCGATAAGGCGGATTCGGCCGAAAAAAAATTCGAAGTGTTGTCTGCTTCTTTGTACGACATCAAAGAATGTGTCGTCTGTAGGGAAGAGCGCAAATGGTATATAATTACCTTCAAGCAAGTTGGAAGAAATGTGATCACAACGCGTGGGGCAAATGTCTTCCTCCTTGATGAAGACGTTTGGGAACATTCGGGCTTTTTGTTGGAAACCTCCTGGCAACAATTTATGCTCGGGCGCTGGTTCATAACATGTTGGACATTTCTCGAGCCCGGCAAATAACAATTGTGTTGAACAATACGCGCCAAGGTTTCAAGATTGTTGACACTGGGAACGCAGCAACACCGCCACCACAACAACAACAACATCATCAACAACGACAAACACAAAACACCACAACAACACACAACAACACAACAACACAAACACCACCACCACAACAACAACGACAACACCATCAACAAACACAACAACAACAACAACAGCAACAACAAGAACGACAACAAACACAATCTCCACAAGCTCAACAACAACAACAGATTTTGCGTCCAGTGCCATTGAATATGTTTCAATTTCAACCTGTAAACGACGATCTGTTGCCCGGTACAAGTGGTACAACAACACACATTGAACCGCCATACCATCAAAGTGCTTTCTCAGACATTTCCGAAAGCCCGTTGCTTCAAATCACGGAAGAGGAGCAATTTCCGGTCGAAGCAACCCCGATGAGGAGTCTTTTGGATCAACTCGATAGTGACAAATCGGAACGCTCTGCCTCTTCTCAAAAAAGCACGTGGGCAACACAAAAGCAAACTCAGGAACATGTACGACGGGCATATAACCGACTAGGAATCGAAAGACCTGAGGAACGCGAAAATGCTCGCCAAGCCCTCACAGCATCGACGTGTGGCTCAATCTCTAGTTCCTCCTCACAAGGGTCAAAAAGGGAAAGAGGAGCCACAACAAAGTCAGACAAAATGAAAAAGGAAGTTGTGAGAAAATTAAGAGCCAAATGTGACGATA
>Hetgly06253.t1 gene=Hg257
ATGTTCCCAAACGTCTTCATCAAGGAGGAAGACATTTGCCCCACGCGTTGTGATCACATTTCTTCCAACTTGCTTGAAGGTAATTATATACCATTTGCGCTCTTCCCTACAGACGACACATTCTTTGATGTCAATACAAAACCGCGGATAAGCGGTGTGATAACTCCGCCTTTCGGCAATGTAAAGCGGAGACCGCTTATCAGTGGTGAAGGAGGTGACCGCCTGATCGGCGGTGTGGAGGGGGACCGCTTATCAGCGGTGAAGGAGGTGACCGCCTATCGGCGGTGTGGAGGGGGACCGCTTATCAGCGGTGAAGGAGGTGACCGCCTGATCGGCGGTGTGGAGGGGGACCGCTTATCAGCGGTGAAGGAGGTGACCGCCTGA
>Hetgly06252.t2 gene=Hg256
ATGCGTTCGGTGGTGGTGGTTGTGCCGCCCACCTCGCCACCAGTGGGGGGGAGTACGCCTGGGACCGTGGCGAAAAAGCACCCGCCGACATCACCAAAAAGGGGCCTGTCCCTGGTGCGCTCCCAGGCCCATCAAATAGGGGCCTGCCCCTCTGTCCCGACTGTCGCCATTGCCAAGCCGAAAGGAGGGAGCGCCCTCCACCGAGGGCAGGGAATCACGGGCAAGGGCTTTCTGGTGTTCAACGCCACGACGGGACTCCTCGAGAACTGTCGTCGGATGATGAAGACCGTTTTGGGGAGGCGCTCGGGACCATCCTCCGCCACCAAGCCGCCGTCCCAGCCCAAAGAAAAAGAATTGGGGGCGCCGCTGGATGCGCCGTTGAATGAGAACGCAACCTTCGAACAACTTTTGGCCGAGTGTAAGCAGATCATTGCCCTTCGCCACAGCACTGCAGCTTTGGCTCGTGGAAAGGAGTTCAATGCTGTGCAGCTGCGCCCGCAAATTTTGAAGGACAAACCGAGGGTCAGCAAATCACCAATAAGAACACGAACATTTTCGACCAACACGCGGCACAACAGCACTTCATCACAATCACAACCACCATCGGCTTGCTTTAAATATTCCCGCACAGGCTCAAATAAGCAAAATGCCAACATCATCGACTGCCTGCACATCATGCCATCCGATTGGAAGACGGAAAATGAACCGTACATTGAGCGGCATGTTCGGCTCAATGGAAAAGTGCACAAAATGGTAGTCGACTCCGGCTCAAAATTGACAATCAAACAAAGCTCAAGGGTCCAAGCAGCATTGGACGATGGAATGCCCCTCGATTTGGAATGTTTTGTTATCGATTCGAGGGACACACTCGATTTGATGGGACTTCCATGGATAAGAGCATTTGAACGCGCCTACAACCAAGTGCGGTCCCCCCTCCACACCGCCGATCAGGCGGTCACCTCCTCCACCGCTGATAAGCGGTCCCCCCTCCACACCGCCGATCAGGCGGTCACCTCCTTCACCGCTGATAAGCGGTCCCCCTCCACACCGCCGATCAGGCGGTCACCTCCTTCACCGCTGATAAGCGGTCCCCTCCACACCGCCGATCAGGCGGTCACCTCCTTCACCGCTGATAAGCGGTCCCCCTCCACACCGCCGATCAGGCGGTCACCTCCTTCACCGCTGATAAGCGGTCCCCCTCCACACCGCCGATCAGGCGGTCACCTCCTTCACCGCTGA
>Hetgly06254.t1 gene=Hg262
AGCGATGAAAGTAATAATCAAATTTGCGCTTTCATAATTCTAAAATTTAGAAAATAGTCACTGATGAATTTCTGTCAGTTAACAAAATCGCTTTGACTGCTGATGGGTGGACTTCAAAGGATAATCGCCATTCTTTGATTTCAGTTACTGGGCATTTTTTGTACCAAAAATTCAAGCCAAAATTTTTGTTTTGAGCACCAAACCAATAAAAGGTTTTTAATATAGTCAGAGTTCGAACATTTTATTTTTCAGGGCGACACACAGCTGAAGCAATTGTGTCATTTATTAGAGAAGCATTAAATGATTTTCAAATTCAAGAGCAGAAAATTTCGGCTTTGACGCGTGACACAGAAAATACGATGAAAAAGGTTGGAAAGGACTTGGGTTTTGTGTCAGTGGATTGCGCAGCGCATGTTTTGCAATTGTGCATTAAAGAGGGACTGAGGTCAATTGAAGAG
>Hetgly06255.t1 gene=Hg263
GTATTCAACAAAAGAATGGGATAAAATTGAACAGAAAATCGCGAAAAAATTGGGCACAAATCGCCAATATATTTATAAATGGATTAAAGAATTTGGTCTTCAAAAAAAGAAAAGCTATAAATCAAAAACTGATGAAGAAAAAACTGAAATTGTGCAAAATTTATTGAAATGAAAAATAGATATAAGCAAAAAAGAAAGTTTTCAGAAAAAGAATGGAAACAAAATTATGCCGAAATTTGTAAGAAAATTGGAGTTGGCTAATTTGACTTTTGGATTATTTTTTCGAGACGATTTCTTGTAAGATTATTTTTATAAAAAATAAATTTTTCTATTTTTTATTTAAAGAAAATATATTCATTTCTTTAAATTCTTATTTCTTTAGCAATTTAAAAATGTCAAACTTAAATCCTGGTATTATTTTGAGCGTCAAGGCAAATCAACTGCTAAATGTAAAGCCGATGGATGTTCCTACTCAAAGACATTAAATGCTTCTCTCAGTACAACAGTGCTTGCTTCTCATCTCAAAAATCACCACCCACAACTTTACAAACACCGTGAAGATTTTGTTCAAGCAGATAAGCAAAAAACAGAAAAGAAGGGACAAAGTGGAATAAACCCATTAAAAAGGGCTTTTGCAAATGCATTTTGTGGTTCAAGTCAACAAATTACTGATGACGAAGAAAAGGAAGCGCCGATTTCATCAAAATCACCTATTTTAATTGGGCTAAATGCAAAAAGCCAGTGGAGCACGGACGGAGACGCAACAATTGGCGCAAATGGGGCACTAATGGAAATGCTGGCCACTCAATTACTGCCATTTAATCTCGTTGACGGTGTTGGATTTCGACAATTCGTTGGAAAATTACAGCCAAAATACAAAATTCCTCGGCGCAATCATTTCGCTCAATATGAATTGCCAAATTGTTTTGA
>Hetgly06256.t1 gene=Hetgly06256
ATGAAAGAGGAGGACGCGGCAAAATTGGAATCGTGGTACAATGAGAATTTTCAAACAGAATTTGAACTAGGGGAGCAGCTTAGGGTGTATTGCGAAAACGACGTGGAAATTCTGATGGCGGCAATTTTGAAGTTTCGGCAGTTATTTTTGGGGATAACAGGAGATTTGGATGTGATGAAGGACAGCGTGACAATCGCTGGTGTTGTGATGAAGATATTCAGGGCAAAATTTTTGAAGGACAGGCATATTCCGATCATGCCTGAGGGAGGGTACGAGAAAGCTGAGAATCAGAGCAAAATCGCAGTGAAATATTTCGAATGGCTGGCACAAAGAAAAGGACTAAAATTGCGGCATGCCTGTAACGGAAGAGAAGTGGAATTTGCTGGGATGAAAGTGGACTGTGTGATTGGGGCAGAGAAAAAAATAATTGAGTTTCAGGTAAAAGAAAAGATATTTTCTTTTTAA
>Hetgly06259.t1 gene=Hg270
ATGATTTTCGGTGCCATTCTCCTTTCCGGTCTCGCATTGGGGTGGCTCATTTACTTCTTGTTCCTCTGCTTTTTCCCTTACTGCTTTCGTCCGATTCGACGTCTTACCACGAAACGCCGTTGTGGGACTCATTCTGGCACTTCTAACCCTTTGGCCGATTCCTCAATTCTTCGCCGTCCGTCAAACACCAAAATCGGCCCTTCGCTCATTCCGCTAATTTGTCGTCTGTTTCCGTTTCGGCCGTTTGATCATCACCAAAAACACATTCTCGGTCGCCGTTAA
>Hetgly06260.t1 gene=Hg271
AATTGGTATAAGTATCGGCGGTGGCATTGACCAAAACCATCGACAGTCCGTCTACAGTGATTCCGGTATTTATGTGACAAGCGTGGAAGCAAATTCACCCGCGGAAGAAGCTGGACTGAAAGTGCATGACAAAATTCTGCAAGTGAACGGCGTCGATTACACGATGATCACTCACGATCGAGCAGTCAAATATTTGAAGAAGGAGCCGGTGTTGGATTTGCTGGTCACCAGGGCCACAGCGAAACACAGCACGGAATCCGAATCGGCTTCCGTCCCCATGGCCTACCACCAAATGGCCAACATGGCCTTGGAAAGTTCGGTCCCGCGCCCTGCAACAGTTCTGACCTTCCGCCACTCTCATCGACGGACAGTGAATGAGCAATGAATGTTTGGATGATCAAAATGCAC
>Hetgly06261.t1 gene=Hg272
ATGTTGCTCATTTTGCTACTTCTGTTCACTGTTGTTGTACGCAGTGACAAAGAATGCGGCGACGGATGGCACTTCAGTGAAGAAAAATTTAATGACGGCAGCGGCAAAATGGACTATTTTTGTTACCGTACAACAAAAGCTGCCGCGTACACGTGGTCGGAAGCGGAGAAAGAATGCACAAAATATGGCGAAGGCACACATTTGATTTCCATCCACTCGAGCAAAGAAAACAGATGGTTGGAAAAGCGTTTCAGGAAGGATTACGAAAATCAAAAAGATGCCGGAAATATTTACAGAGGCTTTTGGATCGGCATGAAACGGTGGCCAGCCGATGGCTCATTTGGCACGCGGTACAGCGGCCTCTTCAAACAATCGTGGTCCGATGGAAGCCGCGTGAACTACGGTAGGGCGGAGAGAGACGCGACCATCTCAGGCCCTGGCGGACCGTGGGCACCATTACAGCCAAGTTACAACGTAACGCCCATTGAGACTTGTGTGATGAGTTACGCATTCAGTGATTATTTTGTAAACCCGTACAAGTTGACGGAAGAACGACTGTACAACAAATGGAATGACATTGTGTGTGGGCCCGAGACGGTGACCTTTATCCCGGGGGACGGGCGGCACATCACCGGCACATTGGTGCAAGGATTGTGCAAGAAGCGGGCGGTGCCGTGCAAAGATGGCAAGGAGGAGGAAGAGGTGGAAGAATAG
>Hetgly06262.t1 gene=Hetgly06262
ATGAAGTTGAGCAAAGCATTTCAAAAAAAGAAGTCATTAGAATTACCAATTGATAATACGATGAACAGATACCGTAAAGTATTGGGAAAAATCAAAAGAAAAATGAATGAGGACGATGATTATTGTACAAAGTGCAAAATTCCTACGGACCGGGTCGAAGATGGACTCCAAAAAATTGCCAGTAAAGCCAAGAAAATAGGTGAAAAACCTTCAGAAAACAAGACTCATCATATTTTCAATGATGAAAAATTTAAAAAGATGTTGAACGGCGCTGCAAAAATTAAATGGAACAACCCGATCAAGAAAAAAAACACTTAA
>Hetgly06263.t1 gene=Hg276
ATGAGAGTGGCGGAAGGTCAGAACTGTTGCAGGGCGCGGGACGGAACTTTCCAAGGCCATGTAGCGGTGGGCCAAATGATCCATGTCCGCCATTTGGTGGCCATTGGTCGGAAACCGAACGGACTGCGCTTCTTACGGGCCGAAGCGTCAGAGCTGCTTTCCGGCGGAAGGTCTGAGCTGTTGGGCGGCGGGGTCCGAAATGTTCTGGGCCATGTCCGCCATTTGGTGGTGCCAAATGATCCATGTCCGCCATTTGGTGGTGGGCCATGTGAGCTGCTTTCCGGCGGTGGAAGGTCGGAGCTGTTGGGCGGGCGGGGTCCGAAATTTCTGGGCCATGTCCGCCATTTGGTGGTGGGCCAAATGATCCATGTCCGCCATTTGGTGGTGGGCCATGTGGTCGGAAACCGAACGGACTGCGCTTCTTACGGGCCGAAGCGTCAGAGCTGCTTTCCGGCGTTGAAGTCTGAGCTGTTGGGCGGCGGGGGTCCGAAATGTTCTGGGCCATGTCCGCCATTTGGTGGTGGGCCAAATGATCCATGTCCGCCATTTGGTGGTGGGCCATGTGGTCGGAAACCGAACGGACTGCGCTTCTTACGGGCCGAAGCGTCAGAGCTGCTTTCCGGCGGTGGAAGGTCTGAGCTGTTGGGCGGCGGGGGTCCGAAATGTTCTGGGCCATGTCCGCCATTTGGTGGTGGGCCAAATGATCCATGTCCGCCATTTGGTGGTGGGCCATGTGGTCGGAAACCGAACGGACTGCGCTTCTTACGGGCCGAAGTGTCAGAGCTGCTTTCCGGCGGTGGAAGGTCGGAGCTGTTGGGCGGCGGGGGTCCGAAATGTTCTGGGCCATGTCCGCCATTTGGTGGTGGGCCAAATGATCCATGTCCGCCATTTGGTGGTGGGCCATGTGGTCGGAAACCGAACGGACTGCGCTTCTTACGGGCCGAAGCGTCAGAGCTGCTTTCGGCGGTGGAAGGTCGGAGCTGTTGGGCGGCGGGGGTCCGAACTGTCCTGGGCCATGTTGGCCATGTGGCGGTGGGGCAAACGGTCCTTGTCCCTTATGATTGGGCGGTCCGCGCGGCTTGA
>Hetgly06264.t1 gene=Hetgly06264
AGTCAGCCCAATGCTAAGTCTCCGTTCCCAAAATATTTTTCACAAAATTTTTGCTATTTAAACGGAATCCAATTTTGCAAATTTCAATCATTGCTCACAATTAAATACGAAAATTATATAATTTATCTTGAATTATGGCCAATTCGTCTCTGATGTTGCCAATTTTCAGTCTGTTCGTCGTGCTCATTGTGATTCAATTTTACGCCACTGAGCAAAGTTCAATCAGCGTAGACCTAGCGCAATTGGATCGCCAAATTAGTGAGAAAAAGCAACGAGCGGACCAATTGCGACAACAAATTGCAAGTGAAAAGAACCCGGTGATTAAGCAGTCGGACACGCGCACATTGCAAGCAATTTTGGAAGAGATCAACAAATTGGAAGCGCAAAAGAAATCGTTTCAAAACACGGATCAAAACGCAAGGAACAATCTTGGATGAGAGACACAGCAAAAAATGAAACGGAGATTTGGCAAAAGTGATCAGCAGTGAGCAAAACGATTGAAAATGTCTGAGTTTGATCGATCGATTGGGATTGATCAGAAAAGAGTGATTGATCGATCTATTTATGTCTTTAAAATGTTTTTAATTGTGATTAAAAAAAGTTCAATAT
>Hetgly06265.t1 gene=Hetgly06265
AAAGATCTTTTTTTAATTTGTATTCGAAAAATAAATGAATTTTATAATAAAAATAATAATTATACATTTAATAGCTCTTTATATTTGTTAGAAAAATATTTTAATACAAAAATGGATCATATGGAAGCAACTTTGACAAAAATAAGATGAACCAAAGAAAATGCCAAAGAATAAAAGGCAAAAACGGAAAGGGCAAAAGCAAATCAATCAAGCAA
>Hetgly06266.t1 gene=Hetgly06266
GGCATTAGAAAAGTCATGGAGTCCGAGTAAATCGTTAGCCCTAATTATTAAATGAAATTAACCAATCACCATTAAAATTGGCTATTCTTTCGAATAATTCAGCATCAAAAAACAACAATTTCTAAATTTGATTTTGCAATGTCTCGTCTCACTGTGCTGCTCCTTTTGGTCGCGCTATTCTGCGCTTGCGCTTTGGTAGACCACGCATCCGCGCAGTGGGGCCCGTGGGGCGGAAACCGTTGGGGCGGCGGATGGGGTGGCAACCGCTGGGGCGGCGGTTGGGGCGGAAACCGCTGGGGCGGCGGCTGGGGTGGCCGCGGATGGGGCCGAGGTTGGGGATGGGGGCGCCGATAAACGGACGGAAAATGGCGAAATTTTGGAGGCCGCGGCACCGGATTTCAATGGATTTGGCGACGAAAGATGAACATGATCAATCAACAAAAGCTTCGCAAAACATTTTTTAATTTATACCCCAGCTAGACACATTACAAAAGAGTGTTGTAATTCGAAGCAAAAATAAGCCGAATAAAATGTGCAATTCTAA
>Hetgly06266.t2 gene=Hetgly06266
ATGTCTCGTCTCACTACCACGCATCCGCGCAGTGGGGCCCGTGGGGCGGAAACCGTTGGGGCGGCGGATGGGGTGGCAACCGCTGGGGCGGCGGTTGGGGCGGAAACCGCTGGGGCGGCGGCTGGGGTGGCCGCGGATGGGGCCGAGGTTGGGGATGGGGGCGCCGATAAACGGACGGAAAATGGCGAAATTTTGGAGGCCGCGGCACCGGATTTCAATGGATTTGGCGACGAAAGATGA
>Hetgly06267.t1 gene=Hg278
AAGATTGCCCTGTGCAGTAATATTGCGATGCCATTGTATGCGTTGTGCAACGGCTTCTACTCTGTGCAACAAAATTGTGACGTTTTTTGCACACCAGATGGTCTAATGCCAATTAAGACCTTCGAAAACTCGTATTATAAGCAAGATTCAGTTGCCATGGGAATGGGTGACAAATTGTTATGTAATGCCGTGCAGCCATTCGTCCGTTTAAAACTGAGCAATGAAGAATTTGTACTTATTCGCGCAATCATTTACTCACATATGGTTTCGCCTGGGCTTAGTGATGGGGCACAAAAATTGTTGTACAGTGAAGCGGAGAAATATTCTTCAGTGTTAATGAGTGTTGTGCAGGCCAATTACGGTGCCGCAGCGGGGGCCCTACGGTACATGGAACTTATGGGATTGATCGTATGGCTTTTCAACACGGGCGTCAAACACCGCCAATTGCTCACTTACATTTCAAATGTATTGGACCCGAATTTCGACAAAGTATTTCCTCCGGTGTTGGCCAAAATATGCACAAAAGGGCCCGTCGAATCACATCAATTGTTCCCATTTTGAAACGAGCATTATTTCAATTTTGTCTTAAATTTGTTGAGATAAATTTACTAATTTTTGAAAACTTTGCATTTAAATCAATTTTACGTAAAATTTTTCTAAAAAAAAATTTTTCAGTCCAAAACGCGCCGCTGCCGATAGGCGACGGCACTAAAATTCCCTCAGGCCGAAAATTTATTAAGAATATTTATTTGCCTATTTCTATAATGCTTATTTTTCGATTTTTTTCTACCTTTTAGGCACCTACCCATTAAGCGGTTTTTTGTTCCTAAAAAAGGAACCCCTAGTAATAAATAATTCAAGATTTACCCCCAAAAATGCCCTAAAAACCCGAAAAATGTCCAAATATACACTAAAAAATGCCTTATAAAGTGAAAAAATACCAAAAATTGTGTAAAAATACAGAATTGACTTTAAAAACAATTTGACTTTAAAAACACCAAAACAATGGCTGAGGAGCATTTTTTGCTCAATTGCAAAAAAATTTGATTTTCAAAATTTATATGCAATTTCAAATTTTTAAATTTTTATTATTTGTTAAAATAAAATTATATTTTTTATATTTTATAAATGGTAGTTATAGAAACCATCAAATGGAAAGCAATTGTTGGGATAAAAGATAAAAAAATATACAATTTAAATTTTTTAACCATCTTTGGCAAATTTTTATGAAATATAGTAAATTTTGCTTTTATTTTTCGATATATTTGTGGTTTAGTGGTTAATGCTTCAACAAGAGTTCGATACCGGTTGACGTTTTGTTTTGCATTTATTTTTTTTATGATTAATAGACAAAAACATCTATAAAAATTGACAATTTTTCGCATAATTTGTTAACAAATTGAAATCAACTTTTCAAAAAAAATTTATCGGCGCCACCGGATGAAAATTTCATTTTTTCCTTGAGTAAATCAGAAAATTTAATATATTTTAAAAAATTTTACAAAATACTGAAGAAAAACAAAAATTTATCGGAAAAATCTTAATTTTTTTTTTTGGTGAATATCTGTTAATAGAGCTTAGATTTCAAAATTCGCCCGGCGGTGCCTATCGGCAAATTAGCCCAAAACCCCTAAATTTGGCCATTTTTAGACAAAATCTGTGTTTTTGGAGCTAATTCAGATCAAACCCCCGCTCCCTCGACTCTGACCCCCGCCAACCCC
>Hetgly06268.t1 gene=Hetgly06268
AGATTTATCATCATGTAAACGATGCCGACTGTACAAATGCTTAACGGTCGGAATGAATCCGCGAAATGTTTGTCCAACAAAATTGAATGACGAACAAACAATGGCATTTGCAGAACGAATGAAAGAGCATCCAGGAAAAAATGCCGTCCTCAACTCGGTTATCCGAAGAGACGGAAAAGGGCAAAATTCAATTTTAAACTATATTTTAAGGGGACTTTAGTTTAATACTCAAAAATTTTGTTGGGTAAGCGCATAACTAAGCGGGATATATTTTTCTAATGGGCCTTCTAGCTTGTTTTATGGAAGAAAAAATTTGAAATTTTTTTTTTAAATTTTGGTAAAAATTGAAAAACCCAAGAAAGGGCGTGACCAAACATTGATGCAATATGTAACAATGTGGAAATGTGCATTTTTAACAAAATTTGTTTAAAAAATTTAATTAAAATTTTCGGAAAATCTGCCTTGAACACAGTCATTTACCAATTTAAATGTCACCACGAAAAAGCAACATATGTGCATTTTAGGCACCGGATCAAAAGGAATTAATCAATTTTATTTTGGTAAAAAATTTGCTGCAAATTGAGCAAAAAGTGCGCCAAATTCGCTACTCACAGACACCAATCCCAGAACTTTTTTACACACAATGTGATACATTTGAATCAATTTTTTCACGAAAATTGAATTTGATCGAATTGGTCAACAAATTTTCGACAAAAACGGTCCAAGCAATTCCAGCAATATATATTGAAAAAGCGCGTCAGTTTGGACCCTACTGTGTAAGGCCAGCGCCAATGGTCATGGATTTGTTATGTGTATTCGAAATTGGCAAAACTTTTCCATTCTTTGGGCAGCTTGACAACAATGACAAGATTGCCCTGTGCAGTAATATTGCGATGCCATTGTATGCGTTGTGCAACGGCTTCTACTCTGTGCAACAAAATTGTGACGTTTTTTGCACACCAGATGGTCTAATGCCAATTAAGACCTTCGTAAACTCGTATTATAAGCAAGATTCAGTTGCAATGGGAATGGGTGACAAATTATTATGTAATGCCGTGCAGCCATTCGTCCGTTTAAAACTGAGCAATGAAGAATTTGTACTTATTCGCGCAATCATTTACTCACATATGGTTTCGCCCGGGCTTAGTGATGGGGCACAAAAATTGTTGTACAGTGAAGCGGAGAAATATTCTTCAGTGTTAATGAGTGTTGTGCAGGCCAATTACGGTGCCGCAGCGGGGGCCCTACGGTACATGGAACTTATGGGATTGATCGTATGGCTTTTCAACACGGGCGTCAAACACCGCCAATTGCTCACTTACATTTCAAATGTATTGGACCCGAATTTCGACAAAGTATTTCCTCCGGTGTTGGCCAAAATATGCACAAAAGGGCCCGTCGAATCACATCAATTGTTCCCATTTTGAAACGAGCATTATTTCAATTTTGTCTTAAATTTGTTGAGATAAATTTACTAATTTTTGAAAA
>Hetgly06269.t1 gene=Hetgly06269
AGGACCCCGCCCATAAACAATATTAATTTTTAACATATTGTATTTCTAATTTCTTTTGGGTAAATATGGCATCCTCTGCTGATCGTAAATGCGATTTTCCTCCCGTCGTTTTCGTTGTGGGTGGCCCGGGCTGCGGAAAAGGCACACAATGCGAGCGGATTGTGGAAAAATTCGGCTTTACACATCTGAGTTCCGGAGATTTGTTGCGCGCTGAAGTTGCATCGGGCTCAGTGTTGGGCAAACAGCTGATGGCGACGATGGACGCGGGTGGGTTGGTCCCATTGGGCACAGTTTTGGCCATTGTGAAGGCGGCCATGCTCAAAAAGCGAGAATCATCGAATGGTTTTCTCATTGATGGGTATCCTCGTGAAGTGACACAAGGAGAACGCTTTGAGCAAGAGATCCAATCGCCCGTTTTGGTCATTTATTTCGAGGCCAACGATGAAACGCTGGTCAAGCGGCTGATGGGGCGGGGACGAAGTGATGACAACGTGGAGACAATCAAAAACAGACTGCACACATTTGTGGAGTCAACAAAACCCGTGGTGGACCATTACGGAAAGCAGGGCAAGCTAGTGAAGATCGCTGCTGAAGGCTCTGTTGACAACATCTTTGCGGATGTGTGCAAACATTTAAGTGAACGCGTCAAATGAGTGAAGGGATAAGCGGAAATGAAGCACAGCTTAATCCTTCTAGCCCAGTGAACGATCAAAAATTATTGCAATCTGTGTTACATTTTTAATAGGTACAACGAATTAATTACTTTTTCTGTTTGTATAATTATTTTATAAAGTTCCAGTTTTTAGCAAATATTTTTTTAAAATACATATTATTATTATTTAATTTAATTTAAATTATTGTGATTTACTTTGATCGCTTGCACTTTTTCTTACTTCGTCTCAGCACGAATTAAATGACATGAAAAATTTATATTTAAAGCA
>Hetgly06270.t1 gene=Hetgly06270
ATGACATCACCGGCTCAATTGCGCTTCGAGTCTTTGACTGATGACGAAGAGGAATCGCTGAGGCGTTTGGAAAGACGTCTGCAGACCTTGGCCCAAGAACAACCAGAGGAGTGCCACGTGAAGGCAAGAGAAGAAAAATACCTTGAGCAACTAAAACAACAAACGGTAAAGGTAGACGATGAAGAAGATGCTCCTTATGAAGCAGCGAAGAATGAAGCCCAAGTGGCAACGGAGGAATTGCAAAAAATGTTAAGAAAGATGGAAGGAAAGGAAAAAAGTGGAAATGAAATGGAGGATGAATTCGGTGCTTTAAATGTGGACGTTCTGGACATTTTGCACATGAATACCGTGATGGTGGAGACCGGGACCGTGGACGCAGAGTTTGGCGCAATTGGGGCGACGCTCGAGGTCGAACCGGACTGGCGAAACAGCGACCAGAACCAAGTCGATAAGTGCCCGTCCACTTCATCGTCATCAGGGAACTTTACGGACTTCGGCACGTTCTTCAATTACATCGGAGGAAACCAATAA
>Hetgly06271.t1 gene=Hg281
ATGGCACATTTACGAAGGGCGACAATGAGCAGCGACAGCGAAACACACGGAAGCGAAGAGGAGGACGAGCGGGAAAGGGATGAAGAAGCATTATTTGGGAAAGAGGGGACGGAGGAGGAAGCCGAGCGAGAGCAGGCACTGCAGGGGGACGCGAGAATGGCACCATGGGATGACGGACAAAGCTCGTGCCAAGGACTGGCTAAGGCGATGAGTAACAACAAAATGTTGGCACTGCCGACGGCAAAGGATGACATTACCACGACCACGCTGGGCACACCCAACGGCACAGTGCTCATGGGCACGGTGGAGTCTCGTAAAAAGGTGATCCGACTTTGGAACGCCATTGTTTTTTCATTCGCCGTGCTCACCCTCCCCCACCACGTCCGTCTTCTCTATACGGTGTGGACCGAGCAGATCATATGCTCCAACAGTTTGGAGGCGTTGGTTCAGCCACTCACTTACCTTTTGCTGTTTCTCTTCTCCTCTTGCAACCCTTTCCTTTACGCGTTTATGAGTCAGCAATTTCGGTCTGCCATCCGCGATATTTTCAAGTGCAGGTGA
>Hetgly06271.t2 gene=Hg281
ATGGCACATTTACGAAGGGCGACAATGAGCAGCGACAGCGAAACACACGGAAGCGAAGAGGAGGACGAGCGGGAAAGGGATGAAGAAGCATTATTTGGGAAAGAGGGGACGGAGGAGGAAGCCGAGCGAGAGCAGGCACTGCAGGGGGACGCGAGAATGGCACCATGGGATGACGGACAAAGCTCGTGCCAAGGACTGGCTAAGGCGATGAGTAACAACAAAATGTTGGCACTGCCGACGGCAAAGGATGACATTACCACGACCACGCTGGGCACACCCAACGGCACAGTGCTCATGGGCACGGTGGAGTCTCGTAAAAAGGTGCTGGGAACGAAACAGGACCGCAGCACCGTCGCCGTTCAGGTGATCCGACTTTGGAACGCCATTGTTTTTTCATTCGCCGTGCTCACCCTCCCCCACCACGTCCGTCTTCTCTATACGGTGTGGACCGAGCAGATCATATGCTCCAACAGTTTGGAGGCGTTGGTTCAGCCACTCACTTACCTTTTGCTGTTTCTCTTCTCCTCTTGCAACCCTTTCCTTTACGCGTTTATGAGTCAGCAATTTCGGTCTGCCATCCGCGATATTTTCAAGTGCAGGTGA
>Hetgly06272.t1 gene=Hg282
ATGTTTTTTGTGGTCCAACTTTCTTTCTTCCACCGCAATATTTTCCTCGCATCGCCGCCACTCCCCCAGGCGATGAGTTCCCTCGACGAGTGCGAATCGGACCCCATTTTAGACCGTCCGATCATTCGCATTCCCATCATTCTCGCATACATCGCCGTGTTTCTGATCTGTCTGATCGGCAATTTGTTCGCAATTCTCGTCATTTGTGCCCACCGTTCCATGCGCACCGCCACCAATTTCTTTTTGGCTAATCTCGCCGTTGCGGACCTTTTGGTTGCCATTTTTTGCATTTTCCAGAATATGTTCCATTTGGTTGGCACCAACGACGGACGTTGGCTTTTCGGTGCCACTTTGTGCAAATTGTACGCGTTCGTGCTTCACCTCTTCCCCTGCACCAGCATTGGCATTCTCGTCTGCGCCTCTGTCGAGAAATACATCGCCGTGTTCACCCCGCGCTTCCGCGTTTTGCTAATGGCCTCCATTTGGGCCATTTCTCTCCTGTTCAGCTTGCCCTATTACATTTTCACCAGTTACATCTTTTACAAGAATGTTGCGGTGTGTACTCGGTTGATGCCTTTGACTAATTCGACAAAAAGTCTGATGAGCACCCGAAACATCGTCACCTCCTCCTTCGTCCTTTGTGCGCCGCTGAAGAAACTGACCCAAGTGGGCAAATTGCGAACAAACAGCAACGAGACGACGACAATTGCCTCGGGGATAGGCAGTGCCAAAACAAGAGCCAAACGAAGTGCGACGCATCCGCCGCCGCCGCCACAACCGACGGATGACGCCGAGAGAGGGCCAAACGGATGA
>Hetgly06273.t1 gene=Hg283
TTTTTTATTTTTTTTGTATTGTTCACATTTAAATATCGGTTTAATTATCCAAGTTTGAGAGGGAACAATAAAACATTATTTTGTTGTGTGAATTGTGTGTTCGACCAATTGCCCCGACCCACCGACCGAGCTCGACTGACCCCTGACCGGACCCCGTTGGCACTACCTTGTGCAAATTTTGTGGACGTTCCCACAAGTGGCGCTCCTGGGTGGATACTTCGTCCGCCAGCAACAGCAACAGCAACCGGTGACAAAGGGGAGAAGGAAAGCATCGGAAAGTGGATAATTGTTCAGTTACTGGGCGACCTCCGTGTCCCCAGTGACAAAGTACTGCTTGCTCTCCGTGGCGGCAGTACTTCGTCGGCGCAGACAAGTCAAACGGCCGACAACAACAAACTGCTCGAACAAAAAGCAGTGGTCAACAAAGCGCAGTGA
>Hetgly06274.t1 gene=Hg284
ATGATTGGCAAAGTGCCGGAGGAAAGGCGAATTGATGCCGGCATATTTTTGGATTTAGGCAAAACAGAAGGTTTGTCATCACTATTCATTGCAAAAACAAATGAAAAGAACTTTTTCACAGAAAAAAATAATGAAAAAAGAAAAGAAGAGAAAATGGAGCAGAACATTGAATTAATGGACAAAATGAATGTTATTGAGGGACAAATGGGCGAATTTTGGGCAAAATTTGCCGAATTTGAACAAATATGCGGGGTTAATTTGAACCAAACTTTGGCCACATTTTGCAAAAATGATCAAAAATCTGCAAAAAACGCCAAAAAAGAGCCAACAAAATCATTTTTGAAAGGTTTGGCTAAGCAAATTGAAGCGGTGAAAAATGATTTGGTGCCAGAATTGGAAGTGGTGATAAATGAGAAAAAATTGGAAAATGCCGTAGTCAAATCGACCAAATTGTTATTTGAATTGGCCGATTTGCAGCTGAAAATTGAAAAGAAATTGCGAAAATATGACGAAATTGGGCGAGAAATCTCACAAAATTCGGTCCATCTAAAAGATGGCAGGGCCAAAAAGAAAGCTTTGACAGATGCAATCCAACAGAATGCCAAAAGCGCAAAAAAGCAAATGGAAAACATTGGCAAAATGCTCAAAAAAATCAAAAATTCCAACAGAAAAAAGATGGGAGATTCAGCATCAAATTAG
>Hetgly06275.t1 gene=Hetgly06275
GCGGCACCCCCGCATCATTATAATTTGAATGAATCTCCTTCGCTCAAATACGGTAACAGCCAATCGGAGGACCCATTGGATTGGACGGGCGATGTATTATATACGGAAGAGCAGGCACAACGTTTGCATGACGGATACAAAAGCGCATGCGCACAGTGTTACCCACCAGAAAAGAAGAAATGGAGAAGGAAAAGACAGGCCCAGCCAAATTTTTGCAAATGGACCAAATTTCCAATTGCTATTCGTTTCAACAGAACATTGGGCGAGCCGACTCCACCTCAATTTATTGACGCTGTCGAACAAGGGATAAAATTCATCATGGACAAGACTTGCCTAAAATTTACCACGGATCTGAGCCATGGGCCGGAGGAAGGCATCGAAATTAACAACGAAACTGGTAACTACTGTGGTCTTTCTTGGATTGGACGACGCACTTGGGAAAAATGGCAAATAATTTCCATATCATGTACCGATCCAGGAACTGTTTGCCATGAGTTTTTACATGCGATTGGCCTCAATCATGAGCAACAGCGGGATGATGCGCGTAAATACAGCAAACTGAATCCAGAAGAACGGAATCAATGGAATGAGGCATATGATAAAACGGATAATTATGACCTTCCCTACGATTTTTTCTCCATAATGCATTATCCTGCT
>Hetgly06276.t1 gene=Hetgly06276
AGTCATTAAATTTTTTCAGAAATGCATTTCAAATTCTCTCTCATTTCTCTCGCCTTTTTGTGCCTAACATTTTGCCTTATCTTCCAAATGCCATGCCAAACTGAGGCTGCTGTTGCTGGCGCTCACACTGTGCTGAAAGTGGCTGGCTCAAAGCCGGGGTCGATGGCACTAAACACTGTGGCACCCGGTCTCGGCACAGCTGCCCGGGTCGCCAATCGTGTGGTCAATCATTAGCCTCGTCATTGAGCACTGCCGTAGGAGACCGGTGGAAAGAAATGCCAAACTTGGGAGGAGTGGAGAAGTGCCGGAATTTTGTTGCAAATCCTTTTCATATTTGTAGTTTTTTCTTTTTTTAATTCTTTTTCGGCTTTTGAATTTGGGCTATATATTTTCTTCAACACTTTCTTTTGACCATTTTACTTTTTTAAAAACTACCTTTACATAAACTTTTATTTAA
>Hetgly06277.t1 gene=Hetgly06277
AAAATTGGCGCAAATGGCACCATTGAATTGACAATCAAAAATTAACTGGCCAAAACATTGCCAATGCCGAACAAAGCATTGCCCAGCAAAGTGATCGGATTCAAAAGCATTATGATCAGATGCTGTGAGAAGAATGCCCTCCTGGTCTCTTTTCGCCACCATTTTCGCTCTCTGTTCGCCGCCCATGGCACAGTTTTGGCCATCCAAATA
>Hetgly06278.t1 gene=Hetgly06278
GGCACCAGAGCAAAAGGAGTTAAAGGAGTTAATGAATTTTATTATGTTGCAAAATTTGCTGCAAATTGAGGAGAAAGTGCGCCGAATTCGCTACTCACAGACACCAATTCCAGAACTTTTTTACACACAATGTGATACATTTGAGTCAATTTTTTCACGAAAATTGAATTTGATCGAATTGGTCAACAAATTTTCGACAAAAACGGTCCAAGCAATTCCAGCAATATATATTGAAAAAGCACGTCAGTTTGGACCCTTCTATGTAAGGCCAGCGCCAATGGTCATGGATTTATTATTTGTATTCGAAATTGGCAAAACTTTTCCATTCTTTGAGCAGCTTGACAACAATGACAAGATTGCCCTGTGCAGTAATATTGCGATGCCATTGTATGTGTTGTGCAACAGTTTCTACTCTGTGCAACAAAGGTGTGACGTTTTTTGCACACCAGATGGCCTAATGCCAATTAAATTGGCCGAAAATTCATTTTATAAGCAGGATTCAGTTGTAATGAAAATGGGTGACAAAATGATGCGTAATGCCGTGCAGCCACTTGCCCGTTTAAAGCTGATCAATGAAGAATTTGTACTTATTCGGGCGATCATTTACTCACATATGGTTTCGCCAGGGCTTAGTGATCAGGCACAAAAATTGTTGCGCAGCGAAGCGGAGAAATATGCTGCATTATTAATGAGTGTTGTACAGACCAATCACGGTCCCGCAGCGGGGGCCCTACGGTACATGGAACTTATGGGACTGATCGAATGCAT
>Hetgly06279.t1 gene=Hetgly06279
ATGGGGCAAGGCCGTCTTCATATGCATTCAATTCACTTCCATTTTACCCCAATCAAAATATTTTTTTTTCTGTCCATCCACGAAATGGAGCAGGACAAAAGGGCCATTGTTCAAAAGCCGGTGGTCTTGGTGCTGACCAAAGTGAATGAGGCGGATGGAGAGCAGGCAAGAAAAGGGATGGGAGGGATGATCAGAAGCAGGGGAAAAGAGGATCCCCCTGGAATGGCACTGTTGAACCACGAGATGGAGCAGGACAAAAGTGCTCTTGTTCAAAAGCCTATGGTTTTGCTGCTGAACAAAGTGATCGAGGCGGAAGGAGAGCAGGCATGCCGAGGGAGGAGAGGGGAAGATGATCAGATAAGCCGGAGGGGGGATTGA
>Hetgly06280.t1 gene=Hg287
ATGCAAAAATTAATCGTTTTTGCTAATGCACAATTTTTCGATCAATTTTATAACCTCTCTTCCATTGTCATTCGAATTCTCGAAAATTGGGAAAATGACGGACCGAATCCGACTCCATCATTTCTCAGCTCACCGGCGGACGACGATTTGAAGGGTGAAATTGGCTACAATTCATGCAATTTAGCCAAACCCATCATTTTGGAGGGGCGAGTGACCCAATTTCGGAGGCGAAATCTGACTTGTCGAAAAATGTTCAAATTTTACTATTTCAAATTATTTTCAAACCCAAAAAAAAAAACAAAAATGGGCATTTTTGACGAATTTGTTATTGTTGACGAAAAAGCATTCACCAATTTGCTGATTGAGAAAGGAAACACATGCCACCTTCACATCAACTGTCTTGGTTGTGCAAATGGCCGCACAAAAAACGTCACAAAATTCAGTGATGTGACTCAATTCGCGGCACTCGAATTTCAATTCCAAAATGCGAATTGCGCATTGGAAGTCAAGGACATTGGCAATGCTTCCGAGTCGGATGTGCCGTTGGCACAAATCATTGTGTGGCGGTGGAATTTGAGGGGGGCACAGACGGTCAAAAATCGGCAAACTTTGAACATTGGTGGCACTTTATTTTTCCATCAATTTTATGCCAGTTCTTCCATTATCATTCGAATTCTCAAAAAACGGCAAAAGGACGGACCGAATCCGACTCCATCATTTCTCGGCTCACCGGCGGACGACGATTTGACAGTTCAAATCGGCGACAAAAAGCTTACTGTATCCGCACATTGGCTTATGTCCGTTTCGCCGGTGGTCCAGCGTATGCTCAGCGTGGAAATGCGGGAGAAGCAGCATCGACTGATCACTTTGAACGAGTTGGGCCTGGACATGGAGCAGTTCAAGGACTTTATGGAGGCAATTTCGCTCGTTGCTCTTCAGTGTCCGATTCTTCCAAATCCTGAGAATGTGCTGGTGTTGCTCAAATTGGCCGACTTCTTCCAGGTGGACTGGTTGAAGAGGCGCTGTGAGACTCAATTGGCAAATTGCGTGGAAATTCCGCTGATCGACCGTTTCCTTCTGATCGAAAAATTTGGACTCATCAATTTGAAAAATTATTTTTTGCATTTGAATTCCGTCGACAAATTGCGCGCATTTTTCAAGTCCAATCATAAAAAACTGTCCTCCAATGTCGTCGCGAGCAAAGAATTGTTGGCCGAATTTGGCATTTCGCAGTGA
>Hetgly06281.t1 gene=Hg288
AGCACATATAAATCCGTTCATTGGTTATTTTCATTTTTGCAATCACATTTACGACAAAAGTGTGCAGCTTTGTTTAATTGCCACAAAATGAACCGACGATTAAGGAAAATCTGGGTGTGCAACGATGTTTTGATGGACATTCTGCCGTTTTTTGACCGTCCTCAACTTGGTCTCAAATTGGCAATGCTTTCCGACCGTTTCGATGTTTTAGTGGACGCGCATTTTGATGGCAAAACGGAATTGACAATTTGGCGACGTATCGTCATTTGAAGAGACGAAGTCACGGAAAAGCCAATTGTTGCCATTTACTGGTCAACCGACGAAACATTTCCACTCATCCAATGCCCGATGCCGCGCAAAATTCGCTTTTACTTCCTTCAGATTGAGTACATTGACGTGGCCGTCATCCAATTTCTCCGCCTCAATCAGCAAATTTGGGACAGAGGCACCAATTTGCGTTTGAATTTTCGCCGGCCATCAGCCAACACCAACAATGTCCAGCCAATTTTGGATGTTTTTGTCCGTCAAATTTGGCCCATTTTTACGCCAACAGCAACAAATGTCCACCATTTGGGAGTTGACCATGGCGCCGATTTGGACACTTTGCTTCGTCTTACATCGCCGACAATTCTCATCGATCTTAAACTCACTTCAGTCCAATGCAATGGTGGACTGTTTCCGGAAGCGCTTGCTGATGACGACGACGATGATGGGCCAAATGCAACAAATTCTGCCGGCCAAATTTTGTCCAAATGGTTACACATGCCGAGAACGGATGGCCGTCCCAAGAAATTGCGATGCCTGACGTCGACATTGTATCGACAACAACCAGCAAATCTTGAATGGATCACCAATTTCAAAGAGAAATTTGTCCGTGCCACCACTTCAGTCAGCTACCAAATGAATTTCGCAATGAAGGGTTCAACACCAATTGTGCTGTTTGGATTGGTGAACGAACGGACGAATGAGAAGCTGACGCTGGAGAAAGTGCCACGGCACCCCGGCAATTGGGTGATGAAACGATGCCCAATTGGGGAGACGGCGGTTCAGTGGGAAGACGGCACTTTGGATGCCAATTTCAACAGTGTCCATTTTATAATGGATATTGACAAACAATGCATTGGGCCATTGTCGCCACCAGCAGCGGAAGAAGCGGGTCAAAGCAACGAAAAAGTGTTCTCGACGGACGATTCTCGGGCCAACTGATTGTGCGGAATGAATGAGTGATTATTTTTGAAAATGTCGTCTGATGATTGCGCGGAATTGAATTATTACCTAATTGTATTTGAGAAATGGACGGATTTCACCAATTGGAAACGGATTTGATGCACATTTTCCCTCATCATAAATGCTCTCCTCTCTCAATTTCATTTGTTGATTTTTCTTTCGAA
>Hetgly06282.t1 gene=Hg289
CTGGGCTTTGACGGAATTGACCGGGACCGAGCTGCCCCGTAAAAGCCCCCAGGCTCGTCCGCTCAATATTAAAAACTGCGTTTGCTCTTGCCTCTGGTGCTAGAAATGAAATAAATTCCAAGACGGAAGAGATTGTTTTTCATTCATTAATAATTGGGAGCAACACACACCCAAAAAAAAAAAATACACAAATCAAAACTTAGCATTTGTCATTTCTACCGAGCGAAATGGGTGCCTACAAATACATGCAGGAATTGTGGCGCAAGAAGCAGTCGGAGGTGATGCGCTATTTGCTGCGCATCCGCTGCTGGCAATATCGCCAAATGGAGGCCATCCACCGCTGCACGCGGCCCACGCGTCCGGAGAAGGCGCGCCGCTTGGGCTACAAGGCGAAGCAAGGCTTTCTCATTTACCGCGTGCGCATTCGCCGCGGGGGTCGAAAGCGTCAAGTGACCAAAGGGCAAACGTACGGAAAGCCGAAAACGCATGGCGTCAACCAGCTGAAGAACACGCGCAGTTTGCAGGCCGTTGCGGAGGCCCGTGCCGGCCGCCGTTTGGGCGAACTTCGTGTGCTCAATTCGTACTGGGTGGGCCAGGACTCGACCTACAAATTCTTCGAAGTCATTCTCGTCGACCCATCGCACAAAACCATTCGTCGTAACCCGGACACCCAATGGATCACCAAACCCGTGCAGAAGCATCGCGAGCAGCGTGGACTCACCTCGGCCGGCCGCAAAAGCCGTGGCCTCGGCAAAGGAATGAAGCACACGAAGACCATTGGAGGCTCGCGCAGAAAGTGTTGGAAACGCCAAAACACCGTCGAATTCCATCGCAAGCGTTGAGCAAATTCATTCATTTTGTATGGTCCATTGGACAGAACGGAGACATTTTTTGCACCATTCTGCTGTTACTTTTTTCTTTTTTTGTTGAGAAATAAAACAAAAAAACATT
>Hetgly06283.t1 gene=Hg290
AGACTTATTAGATATTTGCTTCCGTATTCCCTCTTTGTTGTCCTGTCCATTCATTTTCCATGCTGCTCAACAATCGGTCTCAATTGCCGTTGAGTATTTACGGCGGTGGCATTGGCAGCGGAGTTTCGGCACTTTCCGCCGGTGCCAAAGACCATTCCGCCACCGCTTCTTCCGCGTCCGTTCGTCGGCCCCCGGTCAGCCAATATCAGAGCACGGAGTGCGTGCTGTTCGGCAGCATTTTCAACGATCAGAAAGACCAACTGATCCAACGGCTGAAGGGTCTGTGCGACCCGGACGGACCGACGCCCTTTTTTGAGCACAACATGGTGTTCAAGCTGAAGACGGGCATTGAGTCGCCTGTCCAAGTGCAAATGCGCCGTCGTTTCAAAGTGGACACTGTGCATTGGCACTGCCGTTACGTGTCCCAACCCGAGGCACACATTAAGGACGTGGTCGTGCGCAAGGTCATCGACTCGTTGATTCATTCCACCGACATGATGAGCTTTGTCAAATCGTTGGGGCTGAGGATGGAATACGAATACATTGCCAACGGTTTCCTGTTCACCAAGGGTGACATCCGCATTCTGCTCTACCAACTCCAATGCTCGGAGACCATCGGCAACTACAACAAGTTGAAGCAGTTCGGCGACTCCTTTCTGGTGGAGGCCTCCGTTCTGTTGCCGGGCCATGGGCTCGAGCACTTGCAACAGGCGGCCAAATCGGTGAAGGAATTTGCGGACCAACTGCACCCGTTGTGCAAGCTGAGCTACGTGGACTATGGCAGGGATTGACCGGGCACGGCACGGAGGACAGCGAAAATGCCGAAAAAATGCAAAATTGGAATTTCTCCCAATTTTTTTTTTGATTTTATAAAAAAAAATTTCTTTTTTTTACTTGCTTATTTTGATGCAATTTATTATGTCATTCATGATCATGAACATTATATTTATCAA
>Hetgly06284.t1 gene=Hg291
ATGGTCGAACGCATTGACCACCACCGACGGCAACGGAAGAAGAACGGAGGCACCAACCAGCGGACAGAAGAAGGCGTCGAACTGCTTCAACTTGTTTTAAGAGCGCTTGCACAACGGGTGCAGTTGGTCCGCAAATTCCTTCACCGATTTGGCCGCCTGTTGCAAGTGCTCGAGCCCATGGCCCGGCAACAGAACGGAGGCCTCCACCAGAAAGGAGTCGCCGAACTGCTTCAACTTGTTGTAGTTGCCGATGGTCTCCGAGCATTGGAGTTGGTAGAGCAGAATCTGTCGGCGGGAATTGAGGACAGAAGGGAAGGAATTTTTCTGCCCCCTAAACCCCAACGATTTGACAAAGCTCATCATGTCGGTGGAATGAATCAACGAGTCGATGACCTTGCGCACGACCACCTTGAACACCATGTTGTGCTCAAAAAAGGGCGTCGGTCCGTCCGGGTCGCACAGACCCTTCAGCCGTTGGATCAGTTGGTCTTTCTGATCGTTGAAAATGCTGCCGAACAGCACGCACTCCGTGCTCTGATATTGGCTGACCGGGGGCCGACGAACGGACGCGGAAGAAGCGGTGGCGGAATGGTCTTTGGCACCGGCGGAAAGTGCCGAAACTCCGCTGCCAATGCCACCGCCGTAAATACTCAACGGCAATTGAGACCGATTGTTGAGCAGCATGGAAAATGA
>Hg290.2 gene=Hg290
GTTCAGTTTAAGCCAATTCGGAATTTGTATATGTGGTTTAGGTGGACCAAATTTTGAAAAAGAGAGGGGTCCGTTTTGGTATTTAAAAAAATTGAAAATTATTTTTTGCAGACCTAATTGTTTTTTTTCAAAAAATTGGGCCACCTAAACCGTACAACTAAAAAATTTAATTTTTGTCCGGTTGAAATCATGCATTACAATATTGATGTCTTTCTGTTCGTTTTCATGTATTTAGTAAATATTTCGACCCAAAAATTCGGATTTCACAAATTTGAGTTTTCGATTTTTTTTTTTTTTTTTTTTTTACGAATTTTGGTCCGGGTGATGAATTCGCTGGAATGTATGACTTTTTTTTTTAGTCAGCGATCCTTTAAAGCTCCAGCAAAATGTTTAACAACCCGTAATTTTACACGCGTTTATTTTCCTAATTATAAATGATTTTCCGAGTTGTTGCCCAATTCTCGGGTACACCCCAAAACGTCGCCGCCGAAACGTCGCCGGGACATAACGTCGCCGCAAAAAAAAATTAAAAATTTTATATATTTCAATAAAACTTAAAAATTTCAGAGACGGGCATTGAGTCGCCTGTCCAAGTGCAAATGCGCCGTCGTTTCAAAGTGGACACTGTGCATTGGCACTGCCGTTACGTGTCCCAACCCGAGGCACACATTAAGGCGGGTGATGAGCCGGGCGGGGTCGTCCAAAACGTTGCCGGAAAAAGTGCCAAATAAAATTTTTACAAAAAAATGGCAAAAAACCCATGGGATATTTAAAATGCCGCCCAGAGACTTCATGCATTGTCGAAAAACGATAAAATTGGCAAAAACAGTTAGAATTGTTCACTTAAAGAGTTCGTACTTTAAAATATAAGAATTTATCCCTTGAAAAATTTTTTTTTTACAAAATTGGCAATTTTTCTTAACGCAAAAATTGTTAAATGGAATTTGTAAAAATTTTATCCAAATTTCCAAATTCATTGAAAAATTCTTCGCTATTTCATCAGTCTGTAAAAGGGTTTTTGATTTTCCCCCCCAAATTTTTACAAAAATTGCCTCAATTTTTTTGACGAATGCAAAAATTCCGCTTCCCCTCCCGTTCCATGACCAACGCATGTTAAAAATTAGCCACTTTTTTGTGTAAAATTTTTATAATTTGCATTTAAACGCAATTTTTGGTTGCGATATTGCCTTTTCCTCCCCCTAAACGAATCGTTTACCCCTCATAAAATTTTGCCCATTTTCAAAAATTGCCGATTTTTGCCCCCTTTTCAGGACGTGGTCGTGCGCAAGGTCATCGACTCGTTGATTCATTCCACCGACATGATGAGCTTTGTCAAATCGTTGGGGCTGAGGATGGAATACGAATACATTGCCAACGGTTTCCTGTTCACCAAGGGTGACATCCGCATTCTGCTCTACCAACTCCAATGCTCGGAGACCATCGGCAACTACAACAAGTTGAAGCAGTTCGGCGACTCCTTTCTGGTGGAGGCCTCCGTTCTGTTGCCGGGCCATGGGCTCGAGCACTTGCAACAGGCGGCCAAATCGGTGAAGGAATTTGCGGACCAACTGCACCCGTTGTGCAAGCTGAGCTACGTGGACTATGGCAGGGATTGACCGGGCACGGCACGGAGGACAGCGAAAATGCCGAAAAAATGCAAAATTGGAATTTCTCCCAATTTTTTTTTTGATTTTATAAAAAAAAATTTCTTTTTTTTACTTGCTTATTTTGATGCAATTTATTATGTCATTCATGATCATGAACATTATATTTATCAA
>Hetgly06285.t1 gene=Hg292
ACTACAACAAGTTGAAGCAGTTCGACGCCTTCTTCTGTCCGCTGGTTGGTGCCTCCGTTCTTCTTCCGTTGCCGTCGGTGGTGGTCAATGCGTTCGACCATTTGCAACACGCGGCGGTGGCCAAAAACGCGTCAGTGATGATGAATGGAAAACGGAGAGGGAGCAGTATCAGAAGTACGAGCAACACAACCAGCAACAGCAGCAGCCGAGGGTGGGCAAGCAGGGCGGCAACGGCCAATGGCGGAAAAGCGGCGGCGCCGTCCGGGGCAAAAAAAGCACCGTCGTGCGCAACGATTTCTTCCAAATTTATGTGCGCTCGGGCGCGGGCGGCAGAGGACTGGCGAGGTACAACGGCATCGGCGGTTGCGGCGGCTTTGTGTACGCTCGGCCGAGTGCCAAGCTGAGCTTTGACCGCTTCTGTGGCGGATTTACCCCCGACCGTGCCGCCAATGCGGCCTGGAAGAAAGATGACGACGATGAGGAGGATGAGGATGGCCAAGTGAACGAGGAGGAGCAGCGGAGGAGGGCACGAACGGTGGCGGCGGAGGACGGCGAAAACGCGCGGCAGACGAAGTTGGCCGGACGCCATGGCAGGGACAGGATTCTCGACGTGCCGATTGGTGTGGAAATTGTTGGCCAAAACAACGTGCTGTTGGCCCGGTGCATAACGCCGAAAAAGCCCTATTTGTTGGCCAAAGGGGGGATGGGTGGTTGCGCGGACAACAAATACAATGCCGAGCCGGGCACCGCCTTTTGGGCCACCATCAATTTGAAGCTGTGCCCCAACATTGGGCTGATCGGCTTCCCCAACGCGGGCAAGTCGACGCTGATGCGTGCGCTGGTGCCCGACAAACCCATCAAAATCGCCGCCTATGCCTTCACCACCACGCGGCCCCAGCTGTGCTACGTGAAGTACGACATGGACGACACCAAAAGTGGGGCAAATGCCGTTCCGGCGACCGATGCCGCTGATTTTGAGGATGATGACCAAGAGGAGCATGAAGAGGAGGCTGACTTACCATCGATGACCCCAACAGATGAGGCCAGTGATGGCGATGCGGACAAGGAATTGTCCGAGGCGTTGTCAGTGGTCAACAAAATCCGCTTGGGCGACGAGGAGGAAATTGAGTCGGAAAATGTCAACACTTCGACGGCACCGTTCACTCTGTCCATCGCCGACCTGCCCGGCATTGTGGAGGGCGCGTCGCGCAATCGATACAACGCCTTCGACTGTCTGAAGCATTTGGAGTACAGTGACATCATTGTGATGGTGGTGGACGTGCACGGCTTCCAGCTGGGCCCAAATGAGCCGCTTCGTTCACCCCTGGAAATGATGGCACTGCTCAACCGCGAGATGGAGCAGTACGACCGGGCGCTGGTCCGAAAGCCGGTGGTGTTGTTGCTGAACAAAGTGGACGAGGCGGACGGAGAGCAGAAGGCAAATGAGTTGTGCGACTTTTTGTTGGGCGATGGGCGTGACGGACGGTGGCCAAAGCGTTTGACGGACGACAATTTGGTCCCCCAATATCCCATCAATTTCCGTTCTGTGCATGCAATCAGCGCCAAGCGGGGTCAACTGGGCAATGTGAAGCCGATGCTTCGTCGCATTCACAAGGAGGTAAAGCCTTTGAAGCCGGCACAGTTCGAAGACGATTGGGAGGATTGGAGTGCCGGCGGAAGCAGGGGGCGAAAGAAGAAGAAAGTCCTCTGTTGATTTGTTGCCATCATTTCATTGTTTGACTCGATTTATTTTTCCATACTTTATTTGTATTAAAAGTTTCACATTTT
>Hetgly06286.t1 gene=Hg293
ATGGCAATTTTGCCGAAAAATCTTAAATTGGCTTATGTCCGTTTTGCCGTTGGTCCAGCGGATGCTCAGTGTGGAAATGCGGGAGAAGCAGCAGCGACTGATCACTTTGAACGAGTTGGGCGTGGACATGGAGCAGTAGGAAAATGTGCTGGCGCTGCTCAAGTTGGCCGACTTTTTCAGGTGGACTGGATGAATTCGCGTTGTGAGACGCACTTGGCAAATTGCGTGGAGATCGAACAATTTGAACACCAATCGGCGGCACACACTGGACTCGAACGGAACTGTCCATTCCTTTGCAGATTTTATCATTCATCACTTTTTGCTCTCGAATGGCACAAGAAGATCCTCTCCCATTCCAATGTCCATTGCTACGCGCACAGCGCAGTAGAACTGAACAGCCCCTTCCGGTGCCGATTGCAATTGGCCACGCATACACCGCCGCAGCGATCGCTATGCGGCATTGAACAGAGTGCCAAATTTTCTGGAAACGCATTTCATCGAAATCCGCGTTCTTCCGGAAGACCAGAAGGTTTCCGACACGTCGACTGGCCTTGCAGTGTTTGCAGCGATTTGGGCTCTAATAGCCGCGATTCGTTCCCTTGCGTTCGGGCAATCGCTGCGAATGGACACGACGATGAGTGGAGTGATCAACAACCAACCCAACGTTGGATGTGGAAGGAGTTGGAAGCATTCGAAAGTGCGAGCCGCAAGGAGCGCTGGAATGATACGCATCATTCTGCCCGGTACGAGCGTGAACTCACAGAAGGGATCGAAATTGTAGAAGTGCTCACCTGCGAAGAATTTGTCAATGACTGCATTTTTAAATGA
>Hetgly06287.t1 gene=Hg294
ATGGGAGACATCGTTCAGAGATGCCTTGGCGCGCTTTCAGGCTGGACAAGGTGGGGGAACAGGGTGGCCCCATCCGTCATGCCAAACATGGCCGCACTTATCCAACGCCGCCCAAATGCCCCCTCAGTGGCCAGCGTTCGAGTGAACAACCCGGTTAGGGAATGGATGGCCAGGAACCAAGGGGGAGAGAACGAACCCCCGACGCAACAGCAGCCACAAGCTCAGCAACCGATGCAAGCCGAACAGCAACGATTTGAGCGACTCACGCTCAATGACCAGGGACAAGCATTCCCTCGGGCATCCTATCATGGAGAACCCTCCCGAACGACATGGTACGGTGGGGGCCGGAAATCATGGGAGTGTGCCAACACCTCCGCGATCGGGTTTTCTACCGCCCGGGAGCAACTCCCGCCAAACGGAATCACGACGAATGGGACAAGGCGGGAGTGGTTGCTCGCTGTGTGGACAAGCAGGCCACCAGCCGAGCCGCTGCATCAAATATGGGTCGGCACGCCGAAAGTGCTGACGGAAGAGCTCGGACTTGGGGAGTAA
>Hetgly06288.t1 gene=Hetgly06288
ACTTTTTATTTTATTTTATTTTTAATTATTATTTCATATTTGTAATAATTGATGGCATTAATGAATTTTAAAAGATGAATCCTAACGCTGGCAAAAAGTCACTTTATCTCTTAAAATGTGCGGTGTGCAACTGCCCGTGTCAATATTTCTATTATGGGTCCAAATGTTGTGAAAGTTGCAAACATTTTTTCGTCGCACAATTTCGATGATGAAGGAATACAAATGCAAAGATGGCGGAGAGTGCGAAGCTTTGGAATTATTTAAAAAACAATTAAATGTTCGATAAAGATAAAAATTAATTAAAAA
>Hetgly06289.t1 gene=Hetgly06289
ATGTTCCCTCGCGAGCAGGGATTCCTGATGGATGCCTACCGACAGGCATGTGCCCTACCGTACGGCTACCTGTTGCGGGAACAGAAGATCGGTGAGCGGGTTGTGCACAACTACGACTATTTGAAGAAGTTGGGAAAGACAACGTCGGAGAAGAAGCGCCGTCATTTGTTGAACAGTGCCGGTTGTGAGGAACTGTTAACGCTTGTCGAGATTTGTCTCAACGTTTTGAACGGGAGTTTCTGTCTGAGCAGGAAACAAAAGCAGAGACTTGCGCCATTTGCAAAAGACATCAGACAGTTGGCACGTGTGCGAAGCGAGAGGGGTGCGCGAAAACTAGTGCAGCAGCTGCCCGATACCTGCTTTCGCGCAGCAATAATGGCCAATAAACTTATTCTGCTGCCGTACGAGCACTACAAGGGGCTGGTTGCAGCGAGGGAGACAAAGAATGACGACGACGACGACATTGCTGAGCGGACATACTTGGGCTTTGTCAAACGACAGGTGACCGCTGCAGTACAGAAGCGGAAGGGAAACGTCAGCGAGCGGAACGCAATGTACAACCAGCAGCTGCGCCGGTACCTGAAGATGCGCAAGGAACATAAGGAGCGGCCCGTCCGAGTACAGCTCAGCAACGGTGCTCAACTGCTAAATAAAACAGTGGAGACGGGTGTGCAGGTACGGCCTGGTCCGGACGAACCGAAGGACAAGTCCGTGATGGTTACCGACGAAGATGAAGAGGAAGAAATTGAAGTGCCAAAGTTTTTAACCCCAACAAGCCAGACGCAGGGAAGCAGCCGATCACCCAGGACCAATAAGAAAGCAGCAAAACAGCAAAAATTGATCGAGAAGAAGGACCACCTGTTGGCCATCATTATGTCTGATCCGCAGAGATTCGGCGCAACTGACCGTGGGAAAATCATTAACCCAAAGACGGGCCGAGAGTTCATTGACTCGGACCTGGCCTGGTCAATTGAACGCCTGGTGGACCCTCGCCCGGAGAATGCCCCTTCGCCACGCGGAACAAAAGAGTTGAAGAGGAAACTCGCACAGAATCCGCTCGCCAGTAGCCTACTCAATCGACTGTTTGTTGGAATGGACGAAAAAATAAACAGAATATACACCGATCCGGCCAATCCGGGCGGGTATGCGGGGGCGAGTGCTCTGTACGCGGCGGTGAAGGAGAAGCACCCGAAGTTGAAGCGTGCCGAGTTTGAGGACTTTTTGCAGAGGAACACCACCTACACGCTGTTCAAGCCAAAGAGGGAGAAGTTCCGACGCCTACGCACTGTGCCTGCGGGTTTCATGACCGATGTTCAGGCTGACTTGGCCGATTTCCAAGCCCTTTCGCGCAAGAACAGCGGCTACCGTTACTTGCTGTTGGCTGTGGATGTGTTGTCGAGGCGAATGTTCGGCGCGCCCGTAA
>Hetgly06290.t1 gene=Hetgly06290
ATGCATCAATTTAGCAATACCGTCCGCCAATTGCCGTCTGGCCGTTACTCCGTTCGCCTCACTTGGCGGGAACCTCGGCCTCCCCTCCCCTCGAATTGGGCCATCGCATATCGCCGGCTCCTCTCAACGACCAAGCGTCTGCAATGCTCTCCTGAGCTTCTCGACCGTTACTCCGCCGAACTGACACGGCAAATGGACGCCGACATTATTGACACTATGCTGACCCTTCTCGGAACGACCATTCTCGTCCTCCAATTCATCGGGCGTCGTCGACCAAAATGGCTCAAAATCGGCACCTCGTCAATCCCACGGGGTGGCCCTCCGACGGGCGATTCGTTCAGAGCAGCCAGGACTTTCCTCATCCGACAAGACCAACAGCTGCTCGACGGCTACGAAACACCCCACGTTTTCAATGAGGATGGCCTTTTGTGCCTCAAAACCCGGCTCTACGCAACGCACGACGAACCATTCGTGGTATCCTCCGAGGTTGCCCGTCCTGCCGGCGAATCACGGCACCCCCTTTTGCGAGGCCAACAATGCCCCCTTGCCCCCATGCGCGTCAAACCGGCTAATCCCTTTGAATTCGTCGCTCTCGACATCCTGACCGGCCCTCCGTCCGAAACCGACGCCGTCACCTTTGCCGCGCGCCGAGGCATTCAGTGGGACTTCATTCCCGCCTACAGTCCATGGATGGGGGCTTGCTACGAGCGACTAATCGGCCTCGTCAAAGCATGCATCAAAAGGACGATCGGTCGACGAATTCTCGACTACGACGATTTGAGCGCGTTCCTTGCCGAAATTGAGGCCAGCATCAACAGCCGCCCGATCACATGGGTGTCAGATCAACCGGACTCCTCGAAGCCCCTCACTCCGAAAGACCTCATCCAGCCCGGCCTCCCCAACGACTTGGAAATCGTCGATCTGATCTCGACTATGACGACTGTCTTTCCGGTCCCGAGCGCCTCGCCGCACTTTGGAAGCTTACCGGGAAGCCGCCGACCATTTTTGGCTCAAGATGGAGTCATGAGTACCTCCTCGCCATCAGAGAGCGCGCCGGATGGACCCACAAGGTCCCCGCCTCCGGACCACCACCGCCCCTCACGTCGGCCAAGTGGTCATCATTGA
>Hetgly06291.t1 gene=Hetgly06291
ATGCCGCCCAGAGACTTCATGCATTGTCGAAAAACGATAAAATTGGCAAAAACAGACGTGGTCGTGCGCAAGGTCATCGACTCGTTGATTCATTCCACCGACATGATGAGCTTTGTCAAATCGTTGGGGCTGAGGATGGAATACGAATACATTGCCAACGGTTTCCTGTTCACCAAGGGTGACATCCGCATTCTGCTCTACCAACTCCAATGCTCGGAGACCATCGGCAACTACAACAAGTTGAAGCAGTTCGGCGACTCCTTTCTGGTGGAGGCCTCCGTTCTGTTGCCGGGCCATGGGCTCGAGCACTTGCAACAGGCGGCCAAATCGGTGAAGGAATTTGCGGACCAACTGCACCCGTTGTGCAAGCTGAGCTACGTGGACTATGGCAGGGATTGA
>Hetgly06292.t1 gene=Hetgly06292
ATGCTCTTATACCATTGGCAACTACAACAAGTTGAAGCAGTTCGACGCCTTCTTCTGTCCGCTGGTTGGTGCCTCCGTTCTTCTTCCGTTGCCGTCGGTGGTGGTCAATGTGTTCGACCATTTGCAACACGCGGCGGTGGCCAAAAACGCGTCAGTGATGATGAATGGAAAACGGAGAGGGAGCAGTATCAGAAGTACGAGCAACACAACCAGCAACAGCAGCAGCAGCCGAGGGTGGGCAAGCAGGGCGGCAACGGCCAATGGCGGAAAAGCGGCGGCGCCGTCCGGGGCAAAAAAAGCACCGTCGTGCGCAACGATTTCTTCCAAATTTATGTGCGCTCGGGCGCGGGCGGCAGAGGACTGGCGAGGTACAACGGCATCGGCGGTTGCGGCGGCTTTGTGTACGCTCGGCCGAGTGCCAAGCTGAGCTTTGACCGCTTCTGTGGCGGATTTACCCCCGACCGTGCCGCCAATGCGGCCTGGAAGAAAGATGACGACGATGAGGAGGATGAGGATGGCCAAGTGAACGAGGAGGAGCAGCGGAGGAGGGCACGAACGGTGGCGGCGGAGGACGGCGAAAACGCGCGGCAGACGAAGTTGGCCGGACGCCATGGCAGGGACAGGATTCTCGACGTGCCGATTGGTGTGGAAATTGTTGGCCAAAACAACGTGCTGTTGGCCCGGTGCATAACGCCGAAAAAGCCCTATTTGTTGGCCAAAGGGGGGATGGGTGGTTGCGCGGACAACAAATACAATGCCGAGCCGGGCACCGCCTTTTGGGCCACCATCAATTTGAAGCTGTGCCCCAACATTGGGCTGATCGGCTTCCCCAACGCGGGCAAGTCGACGCTGATGCGTGCGCTGGTGCCCGACAAACCCATCAAAATCGCCGCCTATGCCTTCACCACCACGCGGCCCCAGCTGTGCTACGTGAAGTACGACATGGACGACACCAAAAGTGGGGCAAATGCCGCGGGGCTCGAACCCCCGAGCAGCACACAATGTTGGCTCCGAAATGTTTCGCTGAAACAAAAATATAATTTATCAATTTTTTGGCGCAGTTCCGCGACCGATGCCGCTGATTTTGAGGATGATGACCAAGAGGAGCATGAAGAGGAGGCTGACTTACCATCGATGACCCCAACAGATGAGGCCAGTGATGGCGATGCGGACAAGGAATTGTCCGAGGCGTTGTCAGTGGTCAACAAAATCCGCTTGGGCGACGAAGAGGAAATTGAGTCGGAAAATGTCAACACTTCGACGGCACCGTTCACTCTGTCCATCGCCGACCTGCCCGGCATTGTGGAGGGCGCGTCGCGCAATCGATACAACGCCTTCGACTGTCTGAAGCATTTGGAGTACAGTGACATCATTGTGATGGTGGTGGACGTGCACGGCTTCCAGCTGGGCCCAAATGAGCCGCTTCGGTGGGGGGACAAAACAAAAAAAAAAATTGAAAATTGTGCCCGCATCGGACGGGAATTGAACCAACGAGACAAGACCAAATCATATTAA
>Hetgly06293.t1 gene=Hetgly06293
ATGATGGCACTGCTCAACCGCGAGATGGAGCAGTACGACCGGGCGCTGGTCCGAAAGCCGGTGGTGTTGTTGCTGAACAAAGTGGACGAGGCGGACGGAGAGCAGAAGGCAAATGAGTTGTGCGACTTTTTGTTGGGCGATGGGCGTGACGGACGCGCCAAGCGGGGTCAACTGGGCAATGTGAAGCCGATGCTTCGTCGCATTCACAAGGAGGTAAAGCCTTTGAAGCCGGCACAGTTCGAAGACGATTGGGAGGATTGGAGTGCCGGCGGAAGCAGGGGGCGAAAGAAGAAGAAAGTCCTCTGTTGA
>Hetgly06294.t1 gene=Hetgly06294
TAAATGCAAAAAGCCAGTGGAGCACGGACGGAGATGCAACAATTGGCGCAAATCGCGCACTAATGGAAATGCTGGCCACTCAATTACTGCCATTTAATCTCGTTGACGGTGTTGGATTTCGACAATTCGTTGGAAAATTACAGCCAAAATACAAAATTCCTAGGCGCAATCATTTCGCTCAATATGAATTGCCAAATTGTTTTAAAGCGATGAAAAAAATAGTCACTGATGAACTTCTGCCAGTTAACAAAATCGCTTTGACTGCTGATGGGTGGACTTCAAAGGATAATCGCCATTCCTTGATTTCCGTTACTGGGCATTTTTTGGACCAAAAATTCAAGCCAAAATTTTTTGTATTGAGCACAAAACCA
>Hetgly06295.t1 gene=Hg296
ATTGGGCTCCTCATTTTTGTTAGTTATTCACGTTCTTTGCCTTTTTATGGGTTTTTTAATTTGGTACAGTTGTGGCTTTTATTGAAGCAAAAGGACCCACAGAGACAAATGATTCATAGACGAAAGATCAAAAAGTTAAAAACAATTCCTGCATTTATAAATAAAATTACGAAATAAAAAAGGGTAGCCAAAATGCGCTTTTTAAAATACTAATAAATTTTTATATAAAAATGGCAATTTTGCCGAAAAATCTTAAATTGGCTTATGTCCGTTTTGCCGTTGGTCCAGCGGATGCTCAGTGTGGAAATGCGGGAGAAGCAGCAGCGACTGATCACTTTGAACGAGTTGGGCGTGGACATGGAGCAGTAGGAAAATGTGCTGGCGCTGCTCAAGTTGGCCGACTTTTTCAGGTGGACTGGATGAATTCGCGTTGTGAGACGCACTTGGCAAATTGCGTGGAGATCGAACAATTTGAACACCAATCGGCGGCACACACTGGACTCGAACGGAACTGTCCATTCCTTTGCAGATTTTATCATTCATCACTTTTTGCTCTCGAATGGCACAAGAAGATCCTCTCCCATTCCAATGTCCATTGCTACGCGCACAGCGCAGTAGAACTGAACAGCCCCTTCCGATTGCAATTGGCCACGCATACACCGCCGCAGCGATCGCTATGCGGCATTGAACAGAGTGCCAAATTTTCTGGAAACGCATTTCATCGAAATCCGCGTTCTTCCGGAAGACCAGAAGGTTTCCGGCACGTCGACTGGCCTTGCAGTGTTTGCAGCGATTTGTTCCCTTGCGTTCGGGCAATCGCTGCGAATGGACACGACGATGAGTGGAGTGATCAACAACCAACCCAACGTTGGATGTGGAAGGAGTTGGAAGCATTCGAAAGTGCGAGCCGCAAGGAGCGCTGGAATGATACGCATCATTCCGCCCGGTACGAGCGTGAACTCACAGAAGGGATCGAAATTGTAGAAGTGCTCACCTGCGAAGAATTTGTCAATGACTGCATTTTTAAATGATGCTTTCCCCTTTCATTTTCACATTGAATGCTTTATTCGAGTT
>Hetgly06296.t1 gene=Hetgly06296
GTGTGCAATTGCCCGTGTCAATATTTCTATTATGGGTCCAAATGTTGTGAAAGTTGCAAACATTTTTTCGTCGCACAATTTCGATGATGAAGGAATACAAATGCAAAGATGGCGGAGAGTGCGAAGCTTTGGAATTATTTAAAAAACAATTAAATGTTCGATAAAGATAAAAATTAATTAAAAAGATTTGGCGTCATGTAAGCGATGCCGACTGTACAAATGCTTAACGGTCGGAATGA
>Hetgly06297.t1 gene=Hetgly06297
AGAAGCATTTCCAACTCTCTTTTTCTATTCAAATGGCATTCAAATTGTCATTTTTTTTCATCGCACCCGTGCTATGCTTGTCAATTTTAATGATCGGCCAAATGCCATGCCAAACTGATGCCGTTGCTGTTCATCCCGCTGTTCGAACAGCGGTGAGACTTGCCAATACAAAAGGCGGACAGATTGCACTTGGAATTGTGGCGCCTAGTGCCCTCCCATCTGCTCGGATGGCCAAGCATTTTGTGCGTTAGCGTACGCTGAGGCAATGTGCCACCAGTGACTGATCAGAGAAAGGCAGCAAATGGCTCGAGTGATGGGAAGGATCGGAATTTTGTTGTAACAATTTTTTCCCAAATTTGTAGTTTTTTCATCATTTTTAATTAATTTTCGGCTTTTTATTAAAGTTGGGTTGGACTAA
>Hetgly06298.t1 gene=Hetgly06298
GTTGCAAACATTTTTTCGTCGCACAATTTCGATGATGAAGGAATACAAATGCAAAGATGGCGGAGACGATGCCGACTGTACAAATGCTTAACGGTCGGAATGAACCCGCGATCAAATTTCATACTCTATTTGAAGGATTATTGTGTGGATCTTCAAGTGCTTTTTGATTTTCCAAACAAGCATTTCCAACTCTCTTTTTCTATTCAAATGGCATTCAAATTGGCATTTTTTTTCATCGCACCCGTGCTATGCTTGTCAATTTTAATGATCGGCCAAATGCCATGCCAAACTGATGCCGTTGCTGTTCATCCCGCCGTTCGAACAGCGGTGAGACTTGCCAATACAAAAGGCGGACAGATTGCACTTGGAATTGTGGCGCCTAGTGCCCTCCCAGCTGCTCGGATGGCCAAGCATTTTGTGCGTTAGCGTACGCTGAGGCAATGTGCCACCAGTGACTGATCAGAGAAAGGCAGCAAATGGCTCGAGTGATGGGAAGGATCGGAATTTTGTTGTAACAATTTTTTCCCAAATTTGTAGTTTTTTCATCATTTTTAATTAATTTTCGGCTTTTTATTAAAGTTGGGTTGGACTAAA
>Hetgly06299.t1 gene=Hetgly06299
ATGAGTGTTGTACAGACAAATTACGGTCCCGCAGCGGGGGCCCTACGGTACATGGAACTTATGGGACTGATCGTATGCCTTTTCAACACGGGCGCCAAATATCGCCAAATGCTCACTTACATTTCCAATGTATTGGACCCGAATTTCGACAAAGTATTTCCTCCGGTGCTGGCCAAAATATGCACGAAAGGGCCCGTCGAATCGCAGACAAGAAAATTATTTCAATTATGTCTTAAATTTGTCAGAATTTACGAAACCCTTAGCACAATTTTCTCATTCAACCAATTACGGTCCCGCAGCGGGTGCCCTATACGGTACGTGGAACTTATGGGACTGATCGAATGCATTTTCAACACGGGTGCCAAACATCGTCAATTGCTCACATACATTTCAAATGTATTGGACCCGAATTCCGACAAAGTATTACCTCCGGTGTTGGCCAAAATATGCACGAAAGGACCCGTCGAATCACATCAATTGTTCCCATATTGA
>Hetgly06300.t1 gene=Hetgly06300
AGATTTTCACCCAATTGATTATTAATGGCTTCAAAAGCATCTGATATTTGGAATTTTTTCATTAAAATTTCTTCAGAAGTTGCTAAGTGCCGGCTTTGTGAAAACCAATTAGCATGTAAGCAATCGTGCACCAAAGGATTGTGGGGGCATTTTAAGGCAAAACACGCTAAAGAATTCGAAAGCTATTTGCAAAAAGCCGATCCATCAACGGTAAAAAACCAAGGCATTACTAAATTTTTTGGCAAAGAAGACCCACAAAAAAAGGCGGATGAACAAATTGCAAGGCTGATGATAAAAATGAATTGCTCTTTTTTGTTTGTTGAGGCACCGGAATTACAGAATTTGTTCTCCTTAGCCTATCCGAAACTCCAACTTCGCAGCAACGATTATTTTAGGAGGAATTTAATTCCCAAAATGGCAAATGAAATTCAACAAAAAATTGTTGAGCGAATTGGTCAAGACTTTTTTCGGTGACCTCTGATGGATGGTCGCAAATTACAAAATCACCCGCACTCTTTAGTTTATAAAAACAGACTTTAGTGTATTGAAGGGGAAAGACGAGGATTTGGTGGTGGACCATCAAAAAAGTCGCGCCTTGATATTGTCCCATAAAATTTGCCAAATTTGGAAATTACCGACTTTGATTTTTTGCGCGAACTGTGCCCTTTATTGGAAATTTTTCATCGAGAGACTTAGTAAATGCGAATAATTTCAGTTTTCTAATGAAAAATCGTCAGCATCAACCGTTATTTCAACTATAAAAAGATTGTGTGATTTTTTACAAGAAAAATCTTTCTCAAATCGCATTTTGGGCGTTGCTAGGCTCATAGTGGAGTCCTTAAACGAAAGAGTTCGTGAACTTTGCAGCAACCCTCTGTTGAGAGTGGCAATGCTATTTGCTCCTCGGTTTGCTTACACAGAACTTTTCTCTCAGCAAAATTGGAGGGTTGTGGAACAGCTAATCGAATTTTCAAAAGAGAAATTGGTCTACCCTACAACAGAAATTGACGCCAATTTTGATGTGGGCAACTTTGGTCCGGTTGAGCCAGGAACTGACTGTACATTTGCTGACCAAGAATTAGGTCAAAGCAGCAACGAGAGTATAGAGAAATGTATTGGCAAATTGCATCACCTAAAGCTCGGGGCAGAA
>Hetgly06301.t1 gene=Hg300
TTTTAGCTCAAATTAAAAACAATTTGCTAATTACCTCTCATCAAATTTCAATTACCCATCAAAAATGGTCCTTACTTTGGCGAATGCAACTGCCGAAATGTCGACGACCACCACACAAACGCAAACATTGGACATGCGCGAAATGAAGCGACAACTGAATGTGATCAAAGGGGAGCATGGTGAGCTGTTGCTGACCAGCAGCAACGAAAACGGAGACAAACAGCACCAACAAAATGGACAAAACGGCACAACAAATGGACATCATGCCAATGGGAATGCCAACGGAACAACGGCAAACATGACGGCACCGGCCCAGCCGACGGCACTGCTCACAGTTGATGCGCGAAACTATGTGCCCAACTTGGTGGCGGATGACCAGCGCATGCGTGAACTCGCTGAGTACGGGCTGGACTACGCGCACTCCATTGGGCTTTGTGCGCGCACCGTGGAGCACAAATTCGAATCGGACATTGCGACGACACCGCCGTTGGCACTAATGCCCTCGCCGTTCCCGCTCAGTCTGTACACAAAAGCATTTGAGGTGCAGGAAACACTGAACGAACTGTACTTCCGCATCTCCTGTGACCACGAGTTCCTGCTCGAGACGTACAAAGACGTGATCAAGGGCGACCCGTACATCAAACGATGCGTGGAAATTGCGCAGCAAATCCATGACGAAGGAGTGCACCAACCGTTGGCGCTCAGTGTCCAACGTGCCGATTATTTGTCCCATTGGGACGAGCAGAAGCAATGCATTGAGCTGAAACAGGTGGAAGTGAACATTGGCCAAATTGGTGGGCCCGGCTGTGCCACCCAGACCAACAAATACCATCGCAAAATGCTGGACAAATTGGCCATTGTGCGGGCCGGCACCGGCGGCATGGAAATGTTGGCACACACAGAAATGCCAGTGAATAAGCCACGGCACAAAATGGGCCGAACTCTCTACGAGGCATGGAAATTGTTTGGTGACCCAAATGCCGTGCTTTTGTTCGTCAATCAGCCCGACCTGTTCCCGTTCTGCCATTTTGAACAATTGCAATTCACTACTTTTGAGGTTGAAAAATTGGCGAAACGTGACGGAAACATTGTTCAAGTGATCCGAATGACTTTCAAGGAGTGCGCGGAACGTTGCCATCTTGACGAGAGCGACTTTTCGCTGTATGTGGACGGAAAGCGAGTTGCGCTGGTGCACATGGCGTACGGATATATTGGGGAACATTATCCAACCGAAGCGGAATGGCAAGTGCGCATCGCCATGGAACGCTCAACCGCAATCATTTCGCCAAACATACGACTGCAATTGACGGGCACCAAGAAAATCCAACAGGTGCTCAGTAAGCCTGGCGTTATGGAGAAATTCTTCCCCGATGAACCGCAACGCGTTGCCGCACTGCGCGAAGTGTTCACCGGTCTGTGGGGCCTTGAGAATGACGACGCGGTCACCAACGCGGTTATTGAGGATGCCATCCAAAGGCCCAGGGATTATGTGCTGAAGGCGCAAATGGGCGCTGGCAAAGGCAATTTCTTTGACGACGAAATGGTGGAAAAGCTGAAGACAATGTCGCTGGAGGAGCGGGGCGCGTACATTTTGATGAAGAAAATTTGGCCTGTCGCTGTCAAGAATTACTTGATGCGCCCCTTCCAAGTGCCTTACTTGGAAAACGTGGTCAGCGAGTTGGGCATCTACGGCTCCATCATCGCGGATAGTTCCAACGGCAAAGTGTTGTGGAATTCGGCCGAAGGCTACTTGTCCCGAAGCAAGCCGGCCAACTTGAACCAGGGCGGTGTTTGCGAAGGGTCCGGCGTTGTTGACTCGGTGCTTCTGTTCCCCGACAACGAATTTGTCGGCACCAACTGATTGATCACGGAAATTAGGGGACTGATTGTGCCGAAATTCTCCGTATTGCCCGAATTTTTTTGGATTGATCGCCAATTGTAGCTAATTGATTTTCAATTGATCAATGATCAATTCTTGAATTGTTGCCAACAAACACTATGCCAAAACACACACACACA
>Hetgly06302.t1 gene=Hetgly06302
ATGTACACATTGTTGCTCCACATAAATGTGCACTTGTTGGAATTGGGAAAAGTGCGCGCTGTGTTTTTTGCCCCGAGGGCTTCACTACTTCATCCGGATTCTTTCGTCCATTTTTTTGCTGCTTCATCCCTCAGCTTTTCTCGCTCCACGCCCCCTTTAACTCCTCCCATTCGTCCATCCGCCACCGCCGCCGTAGGACAAAAACAGCAACAACAACAACAACAACAACAACAACAACAACACCTACGGGTTCTGCTGCCCTTGGGGGACAAACACGGGGACGGAATGCTGCTTTTCATTCTTCCGCCGAGGAGGACGGCGGCACACCTGCTGCTGTGTGCTGCTTGCTGA
>Hetgly06304.t1 gene=Hetgly06304
GCCTTGTCGGATTCTTAAAAAAATAATTGTTTTTAACTATTGTTAAAAATTTTGTATTTAGGCTTCATTCCCATCCAAACATCAAAGCAAATGCGCAAATTCTCGTCGCTTTCTTTCCATGTTCTTTTTTTTTTATTGGCCGTCATTCTTTTAGATGAAGCTGATGGAATGAAGAATTGGTTTTCATCATCAAAGAAAGGATACCAAAAACTAGAGAAAAAAGGCGATGATAATGGGCAAAAAAAGGCAAATCCAACGGCGGAAAAAAACAAAAAAAAGTTCAACTTTTGTAACGAAGCCAAAACCGAGGATGACTGTAAAAGTGAAGCTAAAGCAGATTCATGCTATTGGGACAGCAATGTAAAGCATGAGGATGGAAGGACTGGCCAATGCCTGCCAAAAGTCTATTCATACGATGTGCAGAGAGGATCTCGTAAATGAAATTGTCAAGAAACGAAGTTGAAAAGCACAACTTGCTAAGCACGGGCACGACGAGGATGTTGCAGGGAGCAAAAATGGGTTTTTCATTATATTTTTCAGTTTTGTGGCAAAATTTTAATCTTTTAAAAATCACCAAAAGGCTGGAGAATCGTAAAAAAAGAGCATCAAAGAAATATTTCGGAGGCAAAAGCCACAAAATCGAAAATTACTTTTTTTTAGTCAACCAAAAAAAAACCAGATAAACTTGGTATGGTATCATACGGTAGTTCCACA
>Hetgly06305.t1 gene=Hetgly06305
ATGCCCTTTTTTGCACTGTCCGACGATGGAAATGAATTGGAACGGTTGAACGCCCAGCGAAAGGCAATTGACGCAAAAATAGCAGCAGAATTGGTGCGACGGCAAATGGTGAATTGGGGCACCGAATTGACACCAAAGGCCAAGGACAATTTGAAGCATTGGGAAACAATGGAAAAGTTCCAAAAGGTGGATTTGCATTATTAG
>Hetgly06306.t1 gene=Hetgly06306
GAGGGGCTGGAGGAAATCAACCAGAGTTCATTCCGTCCCAGAGTGGAGCGAAGAAACGGTGCAAAAGACGAAGTGCAGAGTTGGAAGAGCTGTACAGGGTTGGTTGCCCAAAATTTTGAGGGGGGAAGAGAGGAATGGAAATGCCAATGCCACCGAATCATCCGTCCGTTTCAACGAAATGTCCTCCTTCATTCATCGTCCAGTTGACCTCCGATCACCGCCGCGCAGGGTATCTTGA
>Hetgly06307.t1 gene=Hg301
ATGACAGTGGAAGTGAACATTGGCCAAATTGGTGGGCCCGGCTGTGCCACCCAGACCAACAAATACCATCGCAAAATGCTGGACAAATTGGCCATTGTGCGGGCCGGCACCGGCGGCATGGAAATGTTGGCACACACAGAAATGCCAGTGAATAAGCCACGGCACAAAATGGGCCGAACTCTCTACGAGGCATGGAAATTGTTTGGTGACCCAAATGCCGTGCTTTTGTTCGTCAATCAGCCCGACCTGTTCCCGTTCTGCCATTTTGAACAATTGCAATTCACTACTTTTGAGGTTGAAAAATTGGCGAAACGTGACGGAAACATTGTTCAAGTGATCCGAATGACTTTCAAGGAGTGCGCGGAACGTTGCCATCTTGACGAGAGCGACTTTTCGCTGTATGTGGACGGAAAGCGAGTTGCGCTGGTGCACATGGCGTACGGATATATTGGGGAACATTATCCAACCGAAGCGGAATGGCAAGTGCGCATCGCCATGGAACGCTCAACCGCAATCATTTCGCCAAACATACGACTGCAATTGACGGGCACCAAGAAAATCCAACAGGTGCTCAGTAAGCCTGGCGTTATGGAGAAATTCTTCCCCGATGAACCGCAACGCGTTGCCGCACTGCGCGAAGTGTTCACCGGTCTGTGGGGCCTTGAGAATGATGACGGGGTCACCAACGCGGTTATTGAGGATGCCATCCAAAGGCCCAGGGATTATGTGCTGAAGGCGCAAATGGGCGCTGGCAAAGGCAATTTCTTTGACGACGAAATGGTGGAAAAGCTGAAGACAATGTCGCTGGAGGAGCGGGGCGCGTACATTTTGATGAAGAAAATTTGGCCTGTCGCTGTCAAGAATTACTTGATGCGCCCCTTCCAAGTGCCTTACTTGGAAAACGTGGTCAGCGAGTTGGGCATCTACGGCTCCATCATCGCGGATAGTTCCAACGGCAAAGTGTTGTGGAATTCGGCCGAAGGCTACTTGTCCCGAAGCAAGCCGGCCAACTTGAACCAGGGCGGTGTTTGCGAAGGGTCCGGCGTTGTTGACTCGGTGCTTCTGTTCCCCGACAACGAATTTGTCGGCACCAACTGA
>Hetgly06308.t1 gene=Hetgly06308
ATGCAAGTGCAAAGTCAGTTCGAACAACAAATAGCGCAAAGGGATGAGACGGGGCAAATGACCGAGTCCATCTGCTTCTGTGTGGTGCTGCTGCCCGAGGGGATGAATAAGGAAAAGTGCCGGGGGCATCGGCAGCAGCAGCAGCAGCAGCAGCCGCCAATGGATGAAGCCGGACGGATCACGAAGCGGAATGAGAGAGAACAGGAAAAATGCAGCGCCCACCCGCGCCGCGGGGAACACAGGGGCGGGGAGAAGAGATGCTTATCACTTGCCTGCCGGTGA
>Hetgly06309.t1 gene=Hetgly06309
CGGGCTAATCCATTGATTATTATAAAACAACCGGTGCCACACATTATGAATTACGACACGCAAGTGAAGGCGTACAAATTTGTCGCCTATTCCGCGCTGACCTTCTCGCTGGCCTCGGTGGTGGCGGCGTTCATTACGCTGCCGCTGATGTACAACTATGTGAGCCATGTGCGGCGACAGCTCAACCAGGACATGGTGTTGTGCCAGGGCTCTTCCTCCGACATCTTTCGCGAGGTTGAGGTGCTGAAAAATGCACCATTCGTCGCGCACGGAAACCGAACGGCGCGCCAGGCCGGCTACGAAGCGCATGCAGCAGGCGCGCCTTCTGGCGCCGGCCCCTCTGGCTCGTCGGTGGGCCGTGCCGGAGGCGCAAACGTGGCTGGTGGCGGTGGCGCGTGCAAACCATGCTGCGTGCCGGGACCTCCGGGCCCTCAGGGACGGCCAGGACGACATGGAAAGCCCGGCAAGCCGGGCGCGCCCGGAGTGCCTGGCGCCGCCGGCGCTGGACCGGCAATTTGCGAGGCCACCCCACCGCCGTGCCCGCGTTGCCCTCAGGGCCCACCCGGAGCGCCCGGTGAACAGGGACCGCCTGGCGAGGTCGGCGCCGAGGGACCTTCTGGACGACCAGGGCCCGAGGGCGCGCCCGGCGAGCAAGGACCAAAGGGAGCGCCCGGGCCACCCGGCGAGAAAGGCCCGGTTGGACAACCCGGAGAAGCTGGCCCACCAGCACCGAACCAGCCCGTGGTGCCCGGAGAGCAAGGACCACCCGGAGAACAAGGCCCACACGGACCCCCGGGACCGCCAGGCCCAGCGGGTGCACCCGGCAAACCCGGAGCACCAGGACCTAAAGGTCCCGTTGGCCCGGAGGGTGCGCCTGGGCCCGAGGGAGCGCCAGGCGGGCAGGGACCGCCTGGACAAGCGGGCGCGCCCGGCTTCAAGGGCATTTGCCCCAAATATTGTGCCATCGACGGCGGCGTTTTCTTCGAGGACGGCACACGACGCTAA
>Hetgly06310.t1 gene=Hetgly06310
ATGTTTTCATCAAAATATCAAAGATTAAAAGACAAAAATGATGACAACCGAAAAAAGGGTTCTTCTTCCCATGGCGCTGGTGGCGATGATGATGGGCAAAGAAAGGGAAACAAACAGAAAGAATACAATAAAGTGGCTGCAGAATGTAACAAACTCACAACACGGGAAGAATTATCCGGATGGACGGATTGGCCAATGCGAGCCATCTCAAGATACCATGTTAGACGAACGTGA
>Hetgly06311.t1 gene=Hetgly06311
ATGGCACAAAATTTGGACAATTCCGAGGACGATAACATTGAGTTTTGTGCCGCAGCAGTCGACTACATGTTTCAAACAACAATTGATCAACTGCCAGTCACGGCCGACGAAATCGCAGAACACATTGAACGTGACGAAGAAATGAAAAAGGTCATTGAACATTGCAGGAATGGATGGCCAAAAACAGCAAACGAATCGACCATGGCAGCATTTTATACGCATCGACTGCGAATCAGTGAAGTCAACGGCTGCCTGCTCATGGGCGATCGCGTCATCATCCCATCTGCATTGCGTTTTCGCATTTTGAAGGCACTTCATTTCACCCATCCCGGCATGCAGCCAAAGCGCCGCCAAAAGTACCGCTTCATCCTTGGCCATCATCAACCGAAGTCTACGAAAGACTGCACATGGATTTCGCTGGTCCTTGTGCCGACGGAAACAAATACCTTGTTGTGGTTGACTCCTACAGCAAATGGCCAGAGAAAGCATGGCATCAAACAGACATTTTCACCGCCATTCCATCCACAGAGCAACGGACGTGCCGAACGATTCGTCGACACATTGAAGCGCCAAATGAAGAAGTGCGCCCGAGACGACGTAAATTGGGTGCAAAATTCGCTTTTGGCCTACCGAAGCACACCGAACGCAAGTTTGAACGGGCGAACGCCCGCTGAGTTGTTTTTGGGCCGTCCGGTTCGAACAATCCTTTCCCTTGTTAAACCCCAAAACAAGCAGGAAAATGAAGGCAACAACGACAAATACAAGCAGCGGATGATCAAACAATTCAATCAGCACCACGGCACACATGAACGAAAGTTTGGCATTGGTGACCAAGTGCAGTTCATCAACTACCAACATGGCACAAAAACTTGGTTGAAGGGCATGATCGAGTCAGGCAATGGTGTAGTTTGGAAAGTTCAGGCACCGAAGTTGAATGCCGTAGTCACACGGCATTCCAATCAAATGAGAAAAATTTATCCCATCCCATACAAAGAACACCATGAACAGTTGCCCGACGAACACCCACAGCAACAACCGCCAAATGATCAACAGGAAGAAGTTCAACCCAGATCGCCACGTCGTGTACGATTTGCGGACGAACTGAACGAACCACTGGAGAGAGCACAATCGCCACCAACACTGAGACGATCAACACGCGAAAGAAAGGCACCGAAGATTTTGAACCCGGATGCCTCAAAAGCCAGATATGATTATGTCTGA
>Hetgly06312.t1 gene=Hetgly06312
ATGGGAGGGTGGGTGATTGACAGTTCTGCTAAAGGGTTTGTCTTGTTCCAACAATTCTTTGTGTTCTTCAACGGACTGTGGCTTAGACGAACAATTTGCCAATTCTTTGATCGCCGGCTTTCTGTTCCCGCTGTCACTTCGGAATTCGTCACTTTTATCACAAAATCGTCCAACAAAGCGGCATTGAATCTGGGAGCTATTCTTAACGCAACTGCGCCATTGGAGGAGACATTCGCAACAAATGATGATGAACAACAACAGCACAACACCGCCCGTCCAAAACGTCAAGCAGCATTGCAGGCAGAACGTGCTTTGACAATGCGTTCTGCGAAAAGGTCCAGAAATGTCCCCTTGGCGGCAGCAAATGATCAGCCCATAACCATGATGGCTCCGAAAAAGACACGCCGCACCTTTTTGTCGGCTTGCGACGAATCCAACGGAATGGCAATCGAAAGGCCCATCTCAGCTCAATCCTCCGACCAACAGCAAATCGTATTGGACAACCCAACGGCAAATTCATTAAAAGTGCGGGAAGCGATGGGCACTGACACTGCGGGGAATGCAACGGCAGATGTGGGGAGTGTCGGAAACGGGACGGTGGACGAAGCGATGAGCACGACATCGACCTACACCGCAAGGCAAAGGCAGAACTTCAACAAAAAACAACGGAAACAAAATGGCCAAATGTTCGTGGACGCACCGGCAGAAAAATTTGGGCCTAGGGTTCGCAAGAACCCTAAGCAGGGAAAATATGAGGTGCAGGCCATTTTGGCCACGACAACGTACAAAAAGGATGGGCAATTACGACGGATCTTCTATGTTCAGTGGTTAGGCTATAGTCAAAAAGACTATAGTTGGGTCTTGAGCGAGTGGATGGACACGCAGGAGCTTGTCACAGAGTTCACTGTTAACTCTGTGATCAGCTGGGTCTTCAAGGCAATTCGTGGCGAGGAAGTGCCGGAAGAAATTGCCGAAAAACTCAGGACAAATCCTGAGCGCAATGTCGACATTAGGACGACGCCAATTGGGTTCTCGTCAACCCTGGCGGGCGATGTGAGACAGCAAAGAATTTTTTTGAATATTTGTTTGACCCTTTTTCGCTCTCGCTCTCGTTCGCGTTCTCGCCCTTCTGTTGCGCACTCTGAACCGGCAATCGAGATGGTTAAACTTTCGACCAATAGCAACAGTGCTGCTCGCCATCGTCACAATTTTCCGCCATTGCCAATTCCTCAATTTCCACCGGCAACTCGGCCTGCATCCGATGCTGAGAATGTAAATGCACAGGGCTTCATTGAGGACTCTTGGATTGGTCAAATGATCAAAACATATGAGCAGCTTGCTGCAATTCGTGAGAGACTCGATCTGCTCCTGTTGCATGCTTTCCATCTCCTTTTTATGGAATTGTTGCTGCTGCTGAAGCAAAATTAA
>Hetgly06313.t1 gene=Hg304
ATGGACATGTTCCGGTTCAAAGTTCATAACGCTGTCAAAGACACCGACGACGCCGCCACCGACTCTGCTGCACCACATGATCAATGTCAACAACGCCAACAGCGCGAGGCGCCTCCCCGCACAATGCCGTTGTCCTTGTTGGCTGAAGAGCAAACTCATGCGTCAGCAGCAGCTGAGGCTGCTGCCGAGGCAGCGAGTGTTGTTGACCAACAGATGTCGGTAGCGCCAAATGACACTCCCGCCATTGCTGGCACGAAAATTGATTTTATGACTGATGAACAAACAGTGGCGGCAGCGCCGCCGCCTCTATTCAGTGAGATTGAACCGACGCACCAGCAGCAGCAAAAACAACAACAGGGGGATACAGCGGAAATCACCGCACCGAAAGTGGAGCTGTCCGCCGAGGACAATGGTGATGATGATGATGAGGCTGAACCATGGATGCAGCGTGGGAGAGCTGCAGGCCTTGTTCCTGTCTAAGGGCGCACGTGGTCGCATGCTCACCCATCTGCAGAAGCGCTGCCTACTGCGCACTGTCCATTTGCGCCCCACCGAGCGCAACATCACACTACATGCACACAATTTTAGTGCACGAAGCGCCAGTCTGACCTTTGCCTGCGGTGGGTATCTGAACCTAACGGTACGTCAATATTTTTTCGCAAAACATGGCGTTCGGCTGCGCCATCCAAGTCTGCCCACTCTGGTGGAATTTGGAGGTGGAATGCATGCTTCATACTACCCGCTTGAGTGCATCCAGGTGCACGTCGCGGTGACTGCACCGGAGGACGCTGCCAGCACCACCTCCACCGCCACTACCACCACCACCGCATCACCAACTGCGTGTCAATTAGTGATCGTAAACAGCACGGCTACGTTTGCTGTGTGGCGCTTAAACGGAAACAATCACTCACCGTCCCAGCAGCAACAGCAGTGCTTTTCCCTTGAACAGTTTTTGGCTTTGGCACGCAACGGGGTGTGCACCGAGTACGCACCCCACCGCTTCCACGCCATTGTTATGCGCATGCGTAGCGGGCCTAGGCAGCAAAGTAGCGCCACCACCGCGACCACCACCACTGCACTCATCTTTCGCAGTGGTCGCGTGGTGCTGACCGGCATTAGGGGTGTCCCGCCCAATCAAATCCACGCCCTCTGTGGCAAGCAAGCCAAAAGGGTTTGCCGACGAGTTGGTGCGGCACTCAAATGGGGCGGATTTCCCGCACTGGCGCTCTCACTGAGCGTCAACGGGGTGGAGATGCGCAATCTGGTCACCACCCTGCACTTGCCCTACCGACTGAACATTGAACAGATGGCACAACACTTGTCATCTCTTGGCCAAAACGATGTGAAACGGGTGTGCCTCGACTTGTGCACCTTCCCCGGCCTTCGCTGTACACTGGTGATACGCAGGCATTCAAATGGGGAAAACACACTGGCAACATGTCTCTTCTTCATCACCGGCACTGTTATTGTGACTGGTGTGCGACAACCGGAAGAACTGGAGCAAGCAGTTGCGTCAGTTCGAGCACTATGTCAAGAGCATCAAAGAAAATCATAA
>Hetgly06314.t1 gene=Hg305
ATGTTGGCCAACCTGGACACCCTGGTCGGCCCCGCACACATTTCGGGTGTGCTCTACTGTTATGGGGAAGTGAATGAAGACGTGCTGCGACTACAACAACTGGAAACTGAGACGGGGGAGGAGGAGGAGGAGGAGTACAAGGGGGGTCAACCGCGGCGACGCTGGGTCCGCCCCTGCCACGCGCTTCCCGATGAGGAGGCGGTGAAGCGGGCAGCCAAAGCGTGCGGCGGCAGACTGCTACTGGTGTTGGATGACCTGATGGTCGGCATGCGTGCCCCGTTCCTTGACCTGCTGTTCACCCGTGGCTCGCACAATTGGGGCGTCAGCGTTGTGTTGATCACACAGCATCTGTTCACGCGAGAGCTGCGCATCACGCGCAACAACGCGCACTATTTGGTGTTGCTGAGGAACCCGGCAGGGGCGCTACAGGTTCGCTCCCTGGGCATACAGCTGTTCCCGGGCCCGGGTGCACTGCACCATTTTCTGGAGGCCTATGATGACGCAACAGCGGACCCGTTTGGCTATCTGTTGATCGACATGCACCCCACCACACGACCTCTGATGCGTCTCAAAACGCATATATACCCCGGGGAGCTGACCGTGGTCAGCAAAACAGATCGATTACAAAAACAACAACAAACACCACAAAAACACAAAGGGCCAAGGCCGAGCAAATACATTTCGCGCAATCTTGCCTTCTTCAAACTGTTGAGCAAGTGTCGATCGGCACGCGGACGGGCCTATCGAAAGCTGGTCAGAAGTGCGACTGGTGAGCAACTGCTGTGCCTGGTGGAAAGTGCATTGAACATCCTACGCTCCCGGGTGCCGCTTCGTGGAAAGCATTTGGACGGACTGCGTGCCCAGGCCCAGCACGTGCGTGCGCTCGTCCGAACCCGGAGTGGACACGGGGCGCGCCGAGTGCTGTTAAGACAACAAACGGGCAGGGGTGTGCCAGCGTTGGCTGGCCTCCTGGCCAGCGTCGTTCTGCCCCTAGTGGTTGATAAGTCAAAGGCGCCAGGTGCTGCTGCTACCGATGCTTTGGGTATTACACCCACCACCACCACAACACCGATTGAACACGTTGCGAAACGCATGGCGCGCGTGGCGCGCACTGCACAGCAGCCAGCAACGCGTGCATTGATGAACGACGATGAACGCCTGATCCACTACCAGCAGGAGTTCAAACGGTTCAAAAAGCTGTTGGCAGATGAGCAGGAACGACCGGCACCTGTCCGCCTCAATCAGCTGCCGAATGATCCGGCCTCCAAAGGAGTGTTGCGTGATGCGCTGACGGAGGCGGCCAAAACATTGCAACAACAACTACCGCAGCAACTGCAACATTCACCTCCCTCCTTGACAAAGCGTCGCAGGCGTACAACAGCGGTGGTCCCTGCCCGGGCTGGTGTTCATTCGACGCCGCCAGTATCCCCACAGCCCCCTGCAGCAGCCGCAGCACCTCAACATCCAGAGCGGCGGCAAGACAAAGACAAATCCGGCATTACTGGACAAAAAGGGAAAAGGAAACGAACCACCACCGCCTCATCGTATACGTCAGCCGCTTCTGGAGCAGAAAAAGAAGAAGAACAACAACAACAGCCAGCAGCTGCATCTACATCATCATCAACAGGCGCCGTCGTTGTTGCCGGAGCTCAGCGCCTGGGTGAGGCGGAGCAGCGACGAAAACAGCAGGCCCTTGACTACACGTCACGTCACGCGGGCACGCTGGGCATCGGTGATGGTCAGCAGGTGTACAAGTTCATGCATGGTGCATACCGCCCGATCAAAAACAGCAGTTTGCAAGCCGTACTCGCCTATCATTTTACATCTGCCCAACAACCACAACAACACCATCGGCTCAAGCCCCCGCCCGGCTACCAAACGTTCATCGCTAACGCTAAACAGCATCCACAGCTGTCACACCTGCTATTCCCCACCTCTAGCACTAGCAGCATCAGTGGTGAGGGACATGGTGGTGGTGGTGGTGGTGCACTCACTCGCACAATGAGAAAACTACGCGTGAAAAGCACAAACAAAGTCAACAGCAACAACAAGAATGCAGCAATGCAGGCCCAAAAACGTGAGCTGTTGGTTGAAAAGGTGTTGGATGAGCTGTACAAGGACACGCGGTCCAATGCCGCGTTCACCAGTGTGGAGCCGCTGCTGCTTGAGGCACGTCGACAACACCCCGGGCGACACATCAGACGGGCCGAGGTGCGCCGTTATTTGGCTCGCCAGCGCGTGTACACCCTGCACCGTCGGGCTGTCCGTCGTTTCCGTCGTCTGCCGACGCTTGCGTCAGGTCTGCATACCGATTGGCAAGCGGATCTGGCCGATTTCACAGCGCTGAAGCGGCACAATCGCGGCCACGCGTACCTGTTGGTGTGCGCGGACACATTGAGCCGTCAGCTGTTTGTGGAGCCGGTGAAGAGCAAGCGCTCCTCGGACATGGTTCAAGCTTTTGAGAAAATATTCCGCCGGGTTGGCTATGTGCCATGGAAGCTGATGACGGACCAGGGCAAAGAGTTCACCGCCGCCCCAGTGCAACGCTTTTTGGTCGATCAAGAGGTGCAACACCATTGCATGCACACCTCACCCCAGTGGCATGCCGGAATTGCGGAGCGTGCCATCAGAAGCATCAAGGAAAGGCTGTACCGCTACTTTACACATCGCGGCGCAAAGTGTTGGACAGGCGTCATACAGCACATTGTGACTGCACTGAACGGGTCGCCGAACCGTGCATTGTTCGGTCTCAGGCCCAACGACATTAATTTTGGCAACGCGGAGCGCGTACGACGCAACCAGCTGGAGCGATTAGCTGCCGGCCAACAGCAGCGACAAAGCCCACGCGCCCGACCCCCTTTCCGTGTGGGGAACCGTGTGCGTATTGAAAAGCACAAGCACGTGTTCAAAAAGGGCTACCTGCCTCGCTTCACTGACGAACTGTTCACGGTGGCAGAAGTACGCACCTCACGACTGCCGATCACCTACAAGCTACGGGATGACGACGGTGAACTGCTCACCGGCTGGTTCTATGCGCAGGATTTGTGCCTTGTTCTTCCGCCTCCACCTCCGCTACAGTCAAAAAGAGATGAACCCATTGCTGATAAAGCGGGAGCTGCTGCTTCTACTACCGTGGGGCCTGTGTACGACATTGAACGTGTGCTGAGAAGGCGGAGGGGGCGCGACGGTGGAGGGCAACCGTACAAACTCCTTTCGGGTACGCCTGCCACGCAAACTTCAGTTCGGCTCACAATGGAGTGTGGGTTTGGCGGTGTTGTTGTACCCGCATTCATGGCCCTCACTGGGCACAACGGAAGACCAGTTTGTCCACGTCGAATGGCAAACCGGCGAGCAGGTGCGCATCCCGGTGCCGGCCAGCAATGTGCGAAATCCTACACAGCTGCTGAACAGCTTGCACCACGCACTGGGTGAGGGCAGTGAGGAGCTGGCCAGCCGCTTGCGTCAAATCCAGCTCAGCTACCATCAGCTTACCGCAGAGGCAGAGACAAGCGCCAAAAAGGAGGTGGAACGTCTTCTTTCGTTGGAGGAACAACAACAACAACCAAGAAATCAGACCAAACGTAATGAAGAAAAACAACAACAACAACCAAAATCTGATGAAATGTTACAGCAGATGCAGCAGAATGAACAGAAAGAGGAATGGAAACGGACACAGTTCAATGCCCATTATCGTCGCACATTGGACTCGCTTGTCGCCCAACGAATGGAAGAGGCGGAGCGCAATTTGTTGAACAAACATTTACCCTTGGGTCTGGAGCTGTGGGTGCAGTCGTATCGCAAGGCACGCCTGTCCTGCCGCTTCAGCTTCGACGTGGAGCAGCAACGGTTCCGACTACAGATTGACCCGGTGCGCATCAAACACGTGGAACTGTCTGAGCAACTTGCCTACATACTCGGCTTCCACATGCGCCACCTGTCTGCACCGATGAGTGTGGCTCGTTACCAGCCGGACATGAAGGGCGGCGTCTCATCCTTCTACGTGTACGCACCCGGACTCATCGAGCCGGTGATCATCGGTGACGTGTGCGTGCCGGTGCTGCGAATGGTTTGCATTCGGAGTGCCCAACCGGACGACATGGTTGAAGAGGCATACACCGCTGTTCAATACCATCAGCTGATCACCAAAGAGATTGCCGAAATTTTTATTGAGATCAGAACCCCAACCGGCGCACTGATGCCCTTTCAATACGGCACCTGCACGTTGACCCTTCATTTTCGGAAAACTCCATATTTTTGAACACCCACACATATATATTGTTTGTCTGTTTTTTGCATTCACACCACATTTATTTATTTTTTTGCGCGTCCAATAAAAATGAACAGCGATGAGATTAACAAAATTTTGTCACGTTGTCATGTCACTCGCCACCAGTATGTTGGCTGCTTCCCATGTGACCGAATCCCGTCCCATTCCTCTCCGATGCCACACTGTATGGTGGTGAATATGGACAAGGCCTCCGGTGGAGGGACCCACTGGGTGGCCATCTATGTTCAGTCACCATACAGTGCTGACTACTTTGACTCCTTTGCGGACTGGCCACCCGCATCGGAGCACATACGTCACTTCTTGGACCGACACTTCACCACCGTTCAGCACAATGCTCGCTGCCTGCAGTCTGAGAGGTCGGCCAGCTGCGGAAAGCATGTGATCTACTTCCTGCATCACCGTTGCCGGGGCTGGACCACTACACCAGATCATTCAGCACATTGAGACGCAAAGGACCGAGCCCGACCGTCTCGTCAGCGCCTTTGTCCGCACACACGTGTTTGGTGACCTTTGATGGTGGAAAGAGAGCCAAAAAACGAAAAA
>Hg307.1 gene=Hg307
TTATGTGGGTTGGAAGCAGGAAAATTTATTGGATTCTTAATATAAAATTATTTATACATTCCAAATTAAAAAATAAAAATAAAAATGGCACAATTCAGAAAGCCAAAAGGAATGAAAATGTAGTTTTTGGAAACATTTTTTTTGCAAATAATTATAAAGAAATAGTTAACAAATTGTGGTACTTTAAGCACGTCATTAGCAGTTTTGGGTAATTAAAACGGATTGTTTACTAGAAATGGAAAATCCATTTCTGCGAATTCATTTGGTTATTTTTTGTAATAATATTTCCATTATTTTACAAGATATTAATTATTTTTGTCATTCATTTAAATTATTAATTCTCATTTAACGGAGCATTCATTTCCTTTTACCCACGAATTAATTAAAGTGCTTCAGCGTTGGCACCAAAATTGAAAAAAAAAATGGGAAACACGCAATGGGATATGCCGTGCCATAAAACAAAAAACGGATTAATTCACTTGAATCATTAGTGGAAAGTGAAATTTAATTGAAATTGAGTAAAATTCAAAAACTAAATAACATTCTCCAATAAGTGGAATTTATACTTTTATAGCAATTAATTATTTAATTTATTTATATTATGAAGCCAATGATTTCATAAATCGACCAATAAATAAACTAATAGCGAAAATTTTTCATCTTGGTTTCATCTAGGGTTGAAGGGGAGGGGCCCATGTGGTTGGGCAAAAACCGAGTCCAGCAGGTATTTTGGCTCGATACTTTAGGGATTCTCGACCGCAATTAGTGCTCACATTTATCTTTTCCCCAAAAATTGACTGGCTGTCCCGTGTCCGTTTCACCACCAATCGCAGCAGCCTGCACAAAAGTGCCGCGAAATTTGGCACGTCAAATTGGCATTGATTTCAGCTGCCGGATCAGCAATGATCAGACGGCACTGATGACGAAATATTTTTATTCGATTAAATTTTGTAAAAAAATTAACATATTAAAAAGATAACTAATTTTTCTTAAATGTGTGTTGTGTTATTTATGTTTGTCCTAAGGAAATGAAAATCTTTGTAATATTTAATCATAAACTGTCCTATTTTACATATTTTTGTCCTGCAGATTTGGTAATAAATCCAAGGCTTTTAATTTTTTAATACGTAATTATTAGCGTTGGAAAACATTTCCTATTAATCGAAAAAATATTAATTCTATAAAATTTATTTCGTTAAATTATTAAATTAGTAATTTTTTTTTGTGAATTTATAATTTTGTCAAGCATTATCATTGAAATATGAAATTGTGTCTATTTTTATTTTTATTTATGTTTTTAATTGTTGAAATTGCAAAAGTTGGATCAGAAGAGAAAAAGCTGCAACAAAAGTCATTTGATGAAATATTTGGAGAAAAATGGGAAGAAAAAGAAGAAAAACAACGAAATGAGCAGAAAAAAAGAGAAATAATCAGAAAATATTATAAAATAAAAGAAAAAATTAAGCAAAAAGGAAGAAAATATCCAAAAAAAGAATGGCATAAAATTGATCAGAAAATAGCGAAAAAATTGGGGACAAATAGTAATTATATTCAAAAATGGATTAAAGAATTTGGTGTTCAAAAAAATAAATGTCATAAATCAAAAACTGATGAAGAAAAACGTCAAATTATTCAAAAATTCATTAAAATGAAAAATGAATTTAAGCAAAAAAGAAAATATTCATTAAAAGAATGGCAACAAAATTATGAAGAAATTGGCAAGAAAATTGGCGTAAACCGTGGAACAATTGGTAAATGGAAGAAACAATTTGGCATTCGCTGTAGAATAACGGAGAAAGAAAAAATGGAAAAAATGAAAAAATATTGGAAAATAAAAAGAGAAAA
>Hetgly06315.t1 gene=Hetgly06315
ATGCCACTTTATACATTCCCGACCGGAGACGCCGACACCGAGGCGATCATTCAATTCGAGAAATCAATTCGACAAAATGAAGACGGCCGTTATTCAATTCGGCTGCCGTGGCGGGACCCCATTCCCGCGTTGCCCAGCAACTTCGCTGTAGCCTACAGGCGCCTCACCAGCCTGATCGGCCGATTACAGCGAATGCCCGACGTGTTGGAGCGTGCCCGTGATTGCCGACGTCGAGAGGCCTTTCTGATGGTTGAGATCGAAGAGACGGATCGCGAGGTATGCAAATTTCTGTGGGTTCGGGATCCCACGAGGCCAGTGACGACGGACAATCTTTTGCCGCTGAGATTCCGGCGCCTCGCTTTCGGGCTGACGCCAAGCCCGTTCTGCCTCGCCGCTGTAGTTCGTCATCATCTCCGGAAATTCGGTTCGGACTTCGCGGAGCAGCTGATCCGCGACACCTATGTCGACAATGTGCTCATCCCCGCGGACACACGAGAGGAAGCGGCCGAAAAGGCCAGCTTGGCGAAGCGAATGTTCACTGATGCTCGGATGAATCTGAGAGAGTTCCTCAGCAATGACCAGAATCTCAATCGGGAATTCCCGACGGACGACTACCTCGGAAAGACGACAACAAAAATGCTCGGCCTTGAATGGGATTCCGAGCGGGACGAAATTCGGATGAATTACCCGGGGATCCCCCCGGATTGCGCCACAACCAACTCTCGCAGGTCCGTACTCAAAATGATCGCCAGTCTCTTCGATCCTTTGGGGACCTTGGCCCCTGCCACTCTCGCAGCCAAGCGTTTCTTCCAACGCTTGTGGGACGCGACTCACGATTGGGACTCTCCACTCAGCCCAGCTGATCAGCGAGAATGGGAGCGAATCACCGCAAGTTGGGACGGGGAAGTAACCCTGATTCCCCGGAAAGTGATAAGTGGAACCGGACTGTCATTATCCCTTCACATTTTCACGGATGCGTCGGAGTTCGCCTACGCCGCCGCAGTGTACATTCGTTCCGAAGGACCCGACGGGATCTTTTCCCGTCTGCTCATGGCCAAGTCGCGCCTCAAGCCAAAGAAAGCGGTGGACACTTTCACCATACCAAGGATGGAGTTGATGGGCATCCTGCTCGGCGTGCGGTTGGCGGCTTTCGTCCGTGCACAACTCCACCGTCCGATCGCTGAACAGCATTTATGGAGCGACTCCATGATTGCTTTGCATTGGGTAAGGAACCACACACCCCAACCGCAGTTCGTAGCCAATCGACTGCTCGAGATACGGACGGCAACGGACATCATCTTCCACCATGTTCGGTCGGAGGATAACTCCGCCGACATTGCAACGCGGGGGATGCCTCCCGCTGAACTTCACGGCAATCACGACAATGGCTCCGTTCACTGCCACTGCCGAGACGTCAACATCGAGCAGTACATGGCCAACCCCGAAAGCAGACTGCCGTTGGATGTACACATCCAATTGAACGGGGTCGAGCTGTTGAGCGAGTACAGCAACACCCGCTGCTGGGTCACTTCACCCAAGCTCGAGGGATGTTACCGGTGCGTTTCGGGAGCATCGGTGGAAGCGGTGTGCCGGACCGATCACGGGACAGCTCTGGCCAAAGTCAAATGCGCCGATGGAACGATGTTTGCCATGCACTGCGGTGGAAACGGGACCACGACAGCTGATCTGTGCCATTTGACCGAGCCGAAGTCTTCACAGAGTGCCAGGGAGCTCGCGTTCATCCCCCGTCAACTCCAATTTGGATTTGGCCACAGAGAGTCAGTTGGTGGCCAGCTTGAACAAGGGGGTGGAATCCGACTACCCGATTGGGGCATGGACCCCTTCCCCCTGTTCCGAATGCTTATCGGAGGCCCATGGATCCTAGTGGCGATCGGGGCCGGAGCCGTCGGACTGCTCGCCTTATATTTGTATATCAAATTCAACCCAGCTTTTCGCATTTATCGGTCGCTGATCACGGTTATCATCCTCCTCGGGTTGGTCGGCAGCGGAGAAAGTGGGCAAATTCCACCAAACACCGACTCCGTCAGCTTAGCAGGGGCTCAAGCCCCTTTTGCCTTCATTCCAATCGGCGGGATTTTAGTGCTTGCACTCATTCGTCTCACAACTCCACGCCGACGCCCGACAATTATCATTTTTCCGCCCTCCCCCCTGGTCTTTTCCATTTTTCTTCTCTCCCCACTACAGCTCGGAGTTCTCTGCCCAAAAGGGGACCAATCAGCAAAGGGGTACCCCCCTGAGCGAGGGGGCGGAGCGACGGCGCCCGGCGCAACCCCCCTCCAACGACTATTTAATCCAGCGGTCCAGAGAAGAATTTCACTTCCTTCCACATTTACCCCCCATTCACTCTCTTATTTTCATTCCCTTTGTGAACCGAGGATGACTGACGACTTCGCAAATGGCGGGTTCGGCGACTGCAACGACGACTTTGGTGGGGACGGAGGTGGGGAAGTTTCCCCTCGGGCACAGACGGGGAGAGGTGCGCAGCGACGAAGGAGCCTCAGCAACCATTCCGAGCTGGGCGCACACGGTCGGCCGATGGCACGTTGCAAAAGCCTGGGGCGCCCAAAGCCCCTTCCGCCCAAATCAGAGCGCCGTTGCGTCGCGGACGATGTCAACTCGTTCGCCGGCGATGGGGAGACGACCCTTGGCAACGGAAAGAGCGCGGGCGGACAGCACAGAAAGAGTGGCGCAGCCAGCGGGTCGTTGGGGAATCTCTCCCCCAAATTGGCCGACGAAAGGAGCACTTCATCGAATCGATGCCATCAACAACGGCCGCCCTCCACGCCCCTCCCATTCAATTTGGGGCCGAAATCGTACTCTTCCTCCTCCTCCTTTTGTTCTTTCTCCACCTTCTCATCAAAAATGTACCGCAGCCGTGACACGGAACGTTCGTCGGGGCGCACGGCTCGACGTCTGCGCCTCTTGGAATTGACGGCCGCCGAACTCGCCCGAGGAGAGTTCGACCATAATCGCCTGGTCCAGCAGCATGTGGAAACGCTGACCGCGTCCTGGCCGCCGCCGACCACTTGA
>Hetgly06316.t1 gene=Hetgly06316
TGTCCGAAAACCCCTGGCCCAAGGGGGGCCGAGAAAGGAGAAGAGGGAGGGCGGGACAAAGAGGGAAGGAAAGAAACGGCACCACCACTCAAAGGAGGAGTGAGTGGACTCCAAACTGCGACCGTCTGGATTGACCCGACTCGTTCACCGGTGGGAAGGGAAGAAGTGAACCTCGGATCATCCGATCCCGTTCGACAGTTGCAGTTTTCGAGAACGGACCACGGGGCAGAGGAAGGCCCCAATTGTACGATTTGCTGTTGGCAATTCCGAAGGGAGGGAAGGGAATTTGCCGCGACCAAAGGAGCGGTCAACAAACACAATTTATTTGCCGTAG
>Hetgly06317.t1 gene=Hg310
GAATTTTACACAAACATTTGTACTCGCGCGTTAGTTGTCAAGGACATTAGCAATGCTTCCGTGGAGGGTGTGCCATTGGCACAAATCATTCTGTGGGGATGGAATAACGGGGCACAAGTGATCAGACAAACAGAGATACTCAACACGGGTTGTTCTGTACAATTCAATGCCGGTTCTTTTGACTCATTTGTGATCAGAATTCTCAAAAAGCGCGAAAATGCCGTCAAAAATCCATTGCCTCCGCTTGATTCGTCGGACGATGAATTGTCTGTACAAATCGGCGAAAAACAGGCAAAAATAGAGACCACAAAAGTCGAAGCGTGGGCGAATTTAGCTTTTAGTCGGCTTTACAAAAATACCGAAAATTTAATTTACCGTACTCCCCTCCCCCATTTATTGTCTCAGCTTACTGTATCCACCAATTGGCTTATGTCCGTTTCGCCGGTGATCCGTCTGATGCTCAACACGGAAATGCGGGAGAAGCAGCAGCGACTGATCACTTTGAATGATTTGGGTGTTGACATGGAGCAGTTCAAGGATTTTTTGGAGGTCATTTCACCTATTGCTCTTCAGTGTCCGATTCTTCCAAACCCTGAAAATGTGTTGGTGCTGCTCAAATTGGCCGACTTCTTCCAGGTGGACTGGCTGAAGTCGCGTTGTGAAACGCACTTGTCCTACGACACGGTGGGGGCCGACTGGGCGCCGCCAACTGGGCGATGCCAACTGGGCGACGACTGGGCGCCAGCCCAACTGGGCGCCGCCAAATGGACGCCAGCCCAACTGGGCGCTGCCAAATGGACGCCAGCCCAACTGGGCGCCAATCCACTTTTCCCTCACAACAATTAA
>Hetgly06318.t1 gene=Hg311
ATGGGTATTTTGTTTGTGGTGCTTCTGTTGTTGATTGTCAGCCCCATTCTGTTCATTGAAGTTTTTGGTGGCTGTGCAGGATCAACATTAAACCACGATGAGCTGGTCCCTGGCGCAAAAGACAGAACGGATATGCAAAAGGATTTGACGAATGCATGGAAAAGTGGATTGGCGCCCAGTTGGGCTGGCGTCCATTTGGCAGCGCCCAGTTGGGCTGGCGTCCATTTGGCGGCGCCCAGTTGGGCTGGCGCCCAGTCGTCGCCCAGTTGGCATCGCCCAGTTGGCGGCGCCCAGTCGGCCCCCACCGTGTCGTAG
>Hetgly06319.t1 gene=Hetgly06319
ATGACCATCGCCAGTGCCTGCGTCAAAAATTTTGCCCTCAATCATCTGAAGCCTAACTCACTTGCCATCGTCCCGGAGAAAGGCTACACCCCTCAACAAAATCAAAGCGCACTCGCCATCAAATACCTCGACTGCTGCCCACACTTCAATCCCAATGACCGTGCCTTCGTTTCCACCTGCACCCACTTGGAACTTAATGCAGCGTTGAAAGCCGGCTACACCGTCCAGAAGTTGTTCCACGTCCTCCAGTACGACCAATGGAGCGACAACGTCTTCAAGTCCTACGTGA
>Hetgly06321.t1 gene=Hetgly06321
ATGTCCCAACAGTACCAACCCCAAAATTTCCAACCCCAAAATTTCCAACAACCCCAAAACTTCCAACAACCCCAACACGTCCAACAGCCGCAAATGCTTATTCCCCAGCATTACGGACATATTCCGGTTGCCCCACAACCGCAGCAGCAGCCGCAGAATGTGCAGAATGTGCTGCCGGCGGCGAATGGACAGGCTTACCAGCCGGCACAGCCGTTGATGCAAATGGTGGTGCCACCTAATGCCGCTCCTCCGATGCAACAGCCGTCCGGTGGGTGTCACGTTCCTCGTCCGGTCCGCCCCAATGTTGAACAAAATGCCAATGGCAATCAACAGCAACAGCGCCGAGGCGCGGCTCCTTACCGCCGCAACAACCGCAACCGCGGTCAACAGCAGGCAAACGGCACAAATGTCCACCAGCCCGGCGCCCCGGCTGTCCCAGCCCGCGCTCCGACTCCGCGAGTCGAACAACTCCTGACCGAGTTGTTGGGTGAAGTGCACAACTTCACTGGTCAATTCGCGCACTTCGCTGGTCAATTCTCTCGCTTCTTCGCCCATGTAAAGAAGAACACCATCCCTCCGCCTTTGCCAAACGGTGATGACGAAGAGGAGGAAGAAGAAGAAGAATCGGACCAGGAGGAGGGGGAGGTCGAAAAGGAAAACGGACAGAAGGATGATTGA
>Hetgly06322.t1 gene=Hg313
ATTTTTAATTTTACATATTATTGTAACTAAACAAATAATGGCAATGAATAAAAATAGATTTTCATACATAAAAAACATGCGCAAAATAAAAAAAAATTTTTGAAAAAATGAATTAAGGAGAATGGCGATTGAAAATTAATTTTTTTTGCTTAAAATAAAATAAATAATAATAATAATAATGTTCACGCATGCGAATAGACCTCTGGAAGCCCTTGAGTTAACATATGAGTCGATAGATGACGCGCTAAAAATTTGCATATCGTCTCCTGCGGACGAGAGTTTATACAAAATGA
>Hetgly06323.t1 gene=Hg315
ATTTTTAATTTTACATATTATTGTAACTAAACAAATAATGGCAATGAATAAAATAGATTTTCATACATAAAAAACATGCGCAAAATAAAAAAAAAATTTTGAAAAAATGAATTAAGGAGAATGGCGATTGAAAATTAATTTTTTTTGCTTAAAATAAAATAAATAATAATAATAATAATGTTCACGCATGCGAATAGACCTCTGGAAGCCCTTGAGTTAACATATGAGTCGATAGATGACGCGCTAAAAATTTGCATATCGTCTCCTGCGGACGAGAGTTTATACAAAACGCAGTGGGACATTTGCGGACGGACATTTGCGGACGGACATTTGCGGACGGACATTTGCGGACGGACATTTGCGGACGGACATTTGCGGACGGACATTTGCGGACAATTCCTGAGAAAAAATTAAATGAAAAAAATTTTTTTTGTTATAAAAATTTCTAATGGAAGAGTGGGCCTCGTCAGTGCGGTGCTCTTCCAAAAGAAAACAAAAAATAAGAAAAAAAGT
>Hetgly06324.t1 gene=Hg316
ATGACTTTTGATTTTGCTGTGCTTCTTTTGCTTTTCATTCCTCCGCTGACATTGGCAAAAAATGCGCGAGCGGAGGGACCCGTGCCGGTTGTTCTGTGGCATGGCATGGATGAAAACCCAATTCGCAAACAACGAGCTGTTCGCAATGAACGGGCAATAGCTGGGTTAGCACAATTGACAGCATCACTTGTGGGCGTGAAAGCAATTATTGCCGCAAATGCAGCTTTAACGGCTTCTACAGCCGTAGCTTTGGCAGCACTTGGAACCGATATCTACCTTGCTATTGAGCTCGTGAGATCCTCTGATCACTATGAGGAATTGCTCAAAGACTTCTTCCCGTTAACATTTGTTTTGGACGATTATGAATTCACTACAGAGGAAATATGCATAAACACAAAGACAATGGCGAGACGAAAATTGCAAGAAGTAAGTTAA
>Hetgly06325.t1 gene=Hetgly06325
TGCCGTTCGGTCCCTTCCCAAGGGGGTGGAATGGAGAGAAGGGTGGGAGGCAAACAAGAAGTGGGCTGTTGTTTGAATAACGGCACCACCGACTCAATTTGGGGGAGAAGCCGGTGCTCCCAGGTTCAACTGCCTAAGTCCGAGCACTCCTGTCAGCACTTCCGGCGTGCCAACTCCTGTCCGATCGTTGCGCTCGGGAGTTTCACTCCCGTTTTCCCTCTCGCTGTCCGATTCGCTGTCCAATCACTGGGGGCAAAGGGGCCGGAGAAGAAGGTGAGTTGCGAATCGGGAGTCGGCTCCCTTTTGACCACCCGCCCAAATTGA
>Hetgly06326.t1 gene=Hetgly06326
ATGGCAAGACGAAGCATGCCAGAGTGGGAGACATCGTTCAGGGATGCCTTGGCGCGGTTCCAGGCTGGACAAGTTGGCCAAGCGCCACAAAGATTCGAACAAGCCAACCGGGTGGCCCCACCCGTCATGCCAAACATGGCTGCGCTCATCCAACGCCGCTCAAATGCCCCATCAGTGGCCAGTGTTCGGGTGAACAACCCGGTCAGGGAATGGATGGCAAGGAACCGAGGGGGAGAGAACGAACCCCCGGCGCAACAGCAGCCACAAGCTCAGCAACCGCTGCAAGCCGAACAGCAACGATTTGAGCGACTTACGCTCAATGACCAGGGACAAGCATTCCCTCGGGCATCCCATCATGCCCGTATTCGAAGGGAGGAGCATCCCAGCGGGAGTGGTTGCTCGCTGTGTGGACAAGCAGGCCACCAGCCGAGCCGCTGCATCAAATATGGGTCGGCCCAAGCCAAACGGCGGAGACTGATCGAGCAACGCCGGTGCCTGAAGTGCTTGGGGTCGGACCACACGGCTTCGCAGTGCACCCGAGCGCATCCTTGCCGAAAGTGCCAGCGACCAGACCATCATTGGCTGATTTGTTGGGAAGGAGGGAAAAAGGATGAACCTCAAATTCAGGCGAAAGCGGAAGAGCCGCGGGCAAACAGGACCATGGTCATTCAAAGAATGGAGCCGACAGAGGAGCGAACATTCGCCGCCAATTCAGGAATGGAAGGCAGAGGGGAGAACGAACGGGATCAAATGCCATCGGTCAAGGCGATCGAGCAATTTTGGTCAGTCGAAGCGATCGGAATTCGAGACGACCCAACACAGGACGCGGACAGTGCGGCGATCATCCAATTCGAGCAGTCAGTGCGACAGCAAGACGACGGGCGGTACAATATTCGTTTACCATGGAGGGAGGAGCACCCCGAACTCCCTAACAACTACGCTGTGGCCTATCGAAGGCTGATAGGGCTGCTGCAACGGCTTCAGAGGACACCGGAAATCCTCAAGCAGTACCAGCAAGTGATCGAAGAGCAGTCCCGAATGGGCGTGATTGAGGAAGCAACGATCGGCACGGGAAAATGCGAATATTTCATCCCTCACCAAGCGGTGATCACGCCGAAGAAGCTGAGAGTCGTCTACGATGCGAGTGCACACGCCAAGGGAGTCCCTTCCCTCAACGATTGTTTGTTGAGAGGGCCGGTTTGGCTGCCGGACCTGGCCGGAATGCTTATCCGTTTTCGGGCATGCCAAGTGCCCGTGATTGCCGATGTGGAGAAAGCATTTCTGATGGTTGGAATCGAAGAAGCCGATCGAGAAGTGTGCAAGTTTTTGTGGGTGCGCGACCCACTCGGGCCGCTAACGACGGCAAATTTGGTGCCCTACCGATTTCGGCGATTGGCGTTCGGCTTAACGCCCAGCCCGTTCTGCTTGGTTGCGGTGGTGCGGCACCACCTACGCAAGTACGGCTCGGATTTTGCGGAGCAGCTCATCAGGGACACATACGTCGACAATGTGCTCATACCGGCGGACACAGTCGAAGAAGCATCGCAAAAGGCTTGGGAAGCCAAACGAATGTTCACGGAAGCGAAAATGAACCTGCGCGAGTTCCTGACAAATGATCAAAACCTGAACAGCAGCTTTTCAGAGGCGGACGCCCTGGGCAAAACGACGGCGAAGATGCTGGGACTCGAATGGGACGCGGAGAAAGACTCAATTCGGATGGTCTTTCCGGGAGTGACTCCCGCCGGTGCCGGAGGCCACAGTTCAAGGCGGGCGGTGCTGAAGACTATTGCCCGACTGTTTGACCCACTGGGACTGCTTGCGCCGGCAACTCTCCCAGCCAAGCAATTCTTCCAACGATTGTGGGAGTCCACACACAGCTGGGATGCCCCGCTGGACGCGGACGATGCGCGAGAATGGAACAGAATTGTGGCAAGTTGGGACGGGGAATTCATCACTATCCCCAGAGTCGCCCGAGCGGACGGGGCCGAATCTTGCCAGCTGCACGTGTTCACCGACGCATCGGAAAACGCATATGCCGCTGCAGCATATCTCCGATCAGAAGGAGTGGACGGGAGCATTCTCTCCCGTCTCATCATGGCCAAATCCCGACTTAAGCCAAAGAAGGCTTCGGGAACGTTCACAATCCCAAGAATGGAGCTGATGGGCCTCGTTTTAGGCGTTCGACTGGCAGCGTTCGTCAAGACTCAATTACACAGGCCAATTTCAGAAGAGCACATTTGGAGCGATTCGACGATTGCTCTCCACTGGGTGAAGAACCGGACACCCCAGCCACAGTTTGTTGCCAACCGGCTGGCCGAGATACGCAAATCCACGGACGCAACATTCCACTACGTGCCAACGAGCAACAACCCAGCGGACTCGGCAACTCGGGGGCTCTCCCCCGCGCATCTACAGCAATTCGAGTTATGGTGGAAAGGCCCAGTTTGGTTGGCGACTTCCTGCGCAACCTGGCCACGTGAGCTCGAGTTCAAAGTGGACGACGACGAAGAGGAAGCAACCCCAGCGGAGGAACTCACCAGCGCCACGCTCGTAGCCCAAAGGGAGGGCACTCCCTGTCAAAAGGAAGAATGGCCCAATTCGGTGCTTAACCGCTGCAGTAAATGGGCAAAAGTTCTCCGCGTGACTGCCTGGGTCAGGCGATTCACCACGAATGTTCGAAAACGCTGTCAGAGGAAGCAAAATGGGAGACCGGAAACTCCCAGCCTTGACACGGGGGAAGAAAGCCCCCTGCGGAGCAAAACCAAACTTGGCGGACAATCGTTGTCCGTCCCAAAGCATCTCCGATCGAGCAGATCAGTCGACACCGAGGACAGTCACCCATCGAAGGAGCTCCCACGCACCATGGCAAGACGAAGCATGCCAGAGTGGGAGACATCGTTCAGGGATGCCTTGGCGCGGTTCCAGGCTGGACAAGTTGGCCAAGCGCCACAAAGATTCGAACAAGCCAACCGGGTGGCCCCACCCGTCATGCCAAACATGGCTGCGCTCATCCAACGCCGCTCAAATGCCCCATCAGTGGCCAGTGTTCGGGTGAACAACCCGGTCAGGGAATGGATGGCAAGGAACCGAGGGGGAGAGAACGAACCCCCGGCGCAACAGCGGCCACAAGCTCAGCAACCGCTGCAAGCCGAACAGCAACGATTTGAGCGACTTACGCTCAATGACCAGGGACAAGCATTCCCTCGGGCATCCCATCATGCCCGTATTCGAAGGGAGGAGCATCCCAGTCGGGAACGCCTCCGAACTTAG
>Hetgly06327.t1 gene=Hg321
ATGATTATTGTGAGATCGCCAAAAAACACTCGCCAGAGGACGGTGAATCTTGGGGTTCAGCCGTTAAATGGAGACACTGACCAACAGAGGGGACAACAGATAGTGGAGAATCCTGTGAATTTGGCAGCAAATCCGAATGTCAACGAGGGAAATAGGCGTAATTCTGTTTCTTCAGCGAACACATCAGTACTCGACGCAAACGAAATTCGACGCAGACTGAAAATGACGGAAAATGCCAACAATGCAGCGGATGGACGAAACGGACAGCAGCAAGTGCACCGAGAAGAAGTGCTTCTGAATGACCATGGTAACAATTTGTTGGCGAATGCAAATTTGGGTGAAAATTTGGAGAAAAGTTTTGTTCAACCATTGGTTGGTGACCAACCACAACAAATACAGCAAAATTTCGAAAACGAATTGCGACAAAATGTAATCGTGGGGGAACAGCGCGTAGCGACATCGACTCCTTATGTCGAAATGCAACTTTTGAGGCAACAAAACATAGAGCGGCGTAATGTAAGCCCACTCCGGTCGCCATTCGAACAAAATTTTCGGGAAAATGTGATTGTAAACCCGATCCGTAATGAAAATCGAGGACCCAATCAGCATTTTGCGGATGGATTTGGAGGACAACCAAATCCTAATGCCCGTCTCCAAGTTTTTCGACACCAACACGCCGAAATCGATCGACATTATTCGAGTGCTTTTCATGCACCGGTGCCGATGCGACAAACCTGTCACGGACAAATTCAACAAGCTGCGTATATGGAGCAACACGGTGCGCATCAGCCTATGCTGCTCCAGCAACAAAATATGCGAGGAGTGATGCATCATCAGCAGCCAATGGCGGGGAGAAATGAATATTTTCCTGAATATTACGGCGGAAGACATTTGTATCCCGACGGCAGAGAACAACCAAACTCGGGGAATAATGAATTAAAAATCGACAGCAAAGTGGAGGATACGAAAGTAATCCCCAGCAAACACGAAAGGGAGTTGTATGTTGCAACCAACCAGGCCATATCTCGCGTGAATGTCAAAGCGTAA
>Hetgly06328.t1 gene=Hetgly06328
ATGGCAAGACGAAGCATGCCAGAGTGGGAGACATCGTTCAGGGATGCCTTGGCGCGGTTCCAGGCTGGACAAGTTGGCCAAGCGCCACAAAGATTCGAACAAGCCAACCGGGTGGCCCCACCCGTCATGCCAAACATGGCTGCGCTCATCCAACGCCGCTCAAATGCCCCATCAGTGGCCAGTGTTCGGGTGAACAACCCGGTCAGGGAATGGATGGCAAGGAACCGAGGGGGAGAGAACGAACCCCCGGCGCAACAGCAGCCACAAGCTCAGCAACCGCTGCAAGCCGAACAGCAACGATTTGAGCGACTTACGCTCAATGACCAGGGACAAGCATTCCCTCGGGCATCCCATCATGCCCGTATTCGAAGGGAGGAGCATCCCAGCGGGAGTGGTTGCTCGCTGTGTGGACAAGCAGGCCACCAGCCGAGCCGCTGCATCAAATATGGGTCGGCCCAAGCCAAACGGCGGAGACTGATCGAGCAACGCCGGTGCCTAAAGTGCTTGGGGTCGGACCACACGGCTTCGCAGTGCACCCGAGCGCATCCTTGCCGAAAGTGCCAGCGACCAGACCATCATTGGCTGATTTGTTGGGAAGGAGGGAAAAAGGATGAACCCCAAATTCAGGCGAAAGCGGAAGAGCCGCGGGCAAACAGGACCATGGTCATTCAAAGAATGGAGCCGACAGAGGAGCGAACATTCGCCGCCAATTCAGGAATGGAAGGCAGAGGGGAGAACGAACGGGATCAAATGCCATCGGTCAAGGCGATCGAGCAATTTTGGTCAGTCGAAGCGATCGGAATTCGAGACGACCCAACACAGGACGCGGACAGTGCGGCGATCATCCAATTTGAGCAGTCAGTGCGACAGCAAGACGACGGGCGGTACAATATTCGTTTACCATGGAGGGAGGAGCACCCCGAACTCCCTAACAACTACGCTGTGGCCTATCGAAGGCTGATCGGGCTGCTGCAACGGCTTCAGAGGACACCGGAAATCCTCAAGCAGTACCAGCAAGTGATCGAAGAGCAGTCCCGAATGGGCGTGATTGAGGAAGCAACGATCGGCACGGGAAAATGCGAATATTTCATCCCTCATCAAGCGGTGATCACGCCGAAGAAGCTGAGAGTCGTCTACGATGCGAGTGCACACGCCAAGGGAGTCCCTTCCCTCAACGATTGTTTGTTGAGAGGGCCGGTTTGGCTGCCGGACCTGGCCGGAATGCTTATCCGTTTTCGGGCATGCCAAGTGCCCGTGATTGCCGATGTGGAGAAAGCATTTCTGATGGTTGGAATCGAAGAAGCCGATCGAGAAGTGTGCAAGTTTTTGTGGGTGCGCGACCCACTCGGGCCGCTAACGACGGCAAATTTGGTGCCCTACCGATTTCGGCGATTGGCGTTCGGCTTAACGCCCAGCCCGTTCTGCTTGGCTGCGGTGGTGCGGCACCACCTACGCAAGTACGGCTCGGATTTTGCGGAGCAGCTCATCAGGGACACATACGTCGACAATGTGCTCATACCGGCGGACACAGTCGAAGAAGCATCGCAAAAGGCTTGGGAAGCCAAACGAATGTTCACGGAAGCGAAAATGAACCTGCGCGAGTTCCTGACAAATGATCAAAACCTGAACAGCAGCTTTTCAGAGGCGGACGCCCTGGGCAAAACGACGGCGAAGATGCTGGGACTCGAATGGGACGCGGAGAAAGACTCAATTCGGATGGTCTTTCCGGGAGTGACTCCCGCCGGTGCCGGAGGCCACAGTTCAAGGCGGGCGGTGCTGAAGACTATTGCCCGACTGTTTGACCCACTGGGACTGCTTGCGCCGGCAACTCTCCCAGCCAAGCAATTCTTCCAACGATTGTGGGAGTCCACACCCAGCTGGGATGCCCCGCTGGACGCGGACGATGCGCGAGAATGGAACAGAATTATGGCAAGTTGGGACGGGGAATTCATCACTATCCCCAGAGTCGCCCGAGCGGAAGGGGCCGAATATTGCCAGCTGCACGTGTTCACCGACGCATCGGAAAACGCATATGCCGCTGCAGCATATCTCCGATCAGAAGGAGTGGACGGGAGCATTCTCTCCCGTCTCATCATGGCCAAATCCCGACTTAAGCCAAAGAAGGCTTCGGGAACGTTCACAATCCCAAGAATGGAGCTGATGGGCCTCGTTTTAGGCGTTCGACTGGCAGCGTTTGTCAAGACTCAATTACACAGGCCAATTTCAGAAGAGCACATTTGGAGCGATTCGACGATTGCTCTCCACTGGGTGAAGAACCGGACACCCCAGCCACAGTTTGTTGCCAACCGGCTGGCCGAGATACGCAAATCCACGGACGCAACATTCCACTACGTGCCAACGAGCACCAACCCAGCGGACTCGGCAACTCGGGGGCTCTCCCCCGCGCATTTGCAGCAATTCGAGTTATGGTGGAAAGGCCCAGTTTGGTTAGCGACTTCCTGCGCAACCTGGCCACATGAGCTCGAGTTCAAAGTGGACGACGACGAAGAGGAAGCAACCCCAGCGGAGGAACTCACCAGCGCCACGCTCGTAGCCCAAAGGGAGGGCACTCCCTGTCAAAAGGAAGAATGGCCCAATTCGCTGCTTAACCGCTGCAGTAAATGGGCAAAAGTTCTCCGCGTGACTGCCTGGGTCAGGCGATTCACCACGAATGTTCGAAAACGCTGTCAGAGGAAACAAAATGGGAGACCGAAAACTCCCAGCCTTGACACGGGGGAAGAAAGCCCCCTGCGGAGCAAAACCAAACTTGGCGGACAATCGCTCGATCAACGAGAGGCGCCGGATCGTGATCCCGGCGAAGCAAATGAAGCGGACGGCGCAGACGAGGACAAAAGGGAGAGCAATACTCCCTTCAGCACGGATGAACGAACGAAGGAAAGCACGCCCGAGCCTGAGCAAATGCTGGGGGAAGAACCGCCAGTGACGCAGGCGAGCCTCACTCCCGTGACTCCCCCCGGGAGTCGACCTCACACCCCACAGCGGAACGAACAATTGTCGGAGGGTCGAGCAGGGCAGGGAGGTGAACGACGAAAATCACAGCGGAATCGCAAGCCACGGAGAATTTGGTCACCTGAGCATCGGAAGGTCGAAAAAGGGGGAGCAAATTCCCCCTGGTCGCCTTGGCGAGACCTCGACATTGGACGGGTGTTGAACAACCCGGAACAACGATTGCCATTGGACGTGGCACGATTGCACCTTCACAATCACGGCTCTTCGATCCGAGCTGAATTTCAGTATTCACCCGTTCAGGTACATATCCAACTCAATGGCCTGGAGCTGATCAGCGAGTACAGCAATACAAAATGTTGGGTGTCCTCACCCACACTCAGTGGGTGCTACAGATGCACATCGGGCGCAACATTCAACGCAACATGCCGCACGGATCACGGCACTGCTTTGGCCAAGGTCAAGTGCGCTGATGGGAAACTGTTTGCCCTTCACTGCGGCGTAAATGACTCAACAAGGGAGGCGATTCCCTTCGACCGTGCAGAAATATTCACGGAATGCAAAGTGAAGTGCCACGCTGGCACCACGACTTTTCGGTTAAAGGGAGAGCTGATCTTCCTCCCTAAGGAGCAACAATTTGGATTTCATCGGCGGGATTCGAGCGGAGGGAAAATTGAGCCCGGGATCACCTTTAATTTTCCCGACTGGCAGATTGACCCATTCCTGCTGCTAAACCTTCTCAGCAGTTGGCAATGGATGCTAATGGCAGCGGGAGCAGCAGCGATCGGATTTGTGGCACTTTTCCTTTTTATCAAATTTAACCCCCATTTTCGTCTCTACCGGGCTCTGATGGCCACAATTCTGCTTCGTGACAACCGGACAGATTTCGTGGCACTTGGGCCTCAACGACTGACTGAAACGCCACAAACGACTGCCAAGGGAGATCCGAACAATTTTTCAGAGGGAGCATTCTCCCTCATCATTTGTGCCATTTACTTGTACTTCACCATCATTGGCTTTTTTTGCCGCCTGCTTTGGACACCCCGACATCGCATCTCACCTTTGTTTGCCCCTCCCCCATTGACCGTTGTCATTTTGGGGGCGATCTGCGCTGCTAATTCATTAACGGGGGCCAGAGAGCCGAAATGGAGAGAGGGAGACAATTTCCCTACGTTTCTGGTGGGCAGACACAAAGAAGACAGCCAATCGCTCGCGGGGAAGTCAAAAGCGAGCGACAGGGGAGGGGGCGGGGCAGGAGGAGGCGAGCGGCAAAGGCCCCTCCCCCCCGGACATTTAAGTCGCCCCTCCCAGCCCAACGAATCATTATTTCCATTCGGCTACTCGGGGGAGATCAATCCACGCGCATCAACCCCTTCTCTCTTTCACGTCCATTCGTCCCATAAATTTGGATTTTTACAGATCATTTCCCCAATTTCTTTCATGTTTTCTGGCAATTTTGATCTGATGGACGGTGGCAGAAGCATGCGAGACGGCGGGAGTTCACTTCCCCCCACGGACCGGCGGACCGACGAAAAGCATCCCTTTTGGGTCGCAGCACGAGAGTCGAGGAGGGGAAGAATGGGCAACGAAAATGGCGGCGCGGCTCCGAGAGGAGGGACAGAATTGGGCAGACAGCGGAGTCATCACGGCCTCATGGGAGTTGTAAAGCCTCTCCCAGAGCTGGGCGATGTCGAGACAATTGCCGATGAATTGGAGGCGTTGCAGGTTGCTGATTGGTCGGAGGACCCCTGGGAAAGGGCCAAGGTGGAGAGCCACCTGCGCAGTAAGGAGTTGGATGGTTGGAGAATGGTCCATGTACGGTCCGGGTCGGTGGCGCCCAAACCATTTGTGATGGGTTTGCTTCCGGCAAACCGTCAGCTAATAGCCCCGGGATGGGTGGTCAGCAGATATTTTGCGGAGCAGCGCGAGCTGCCGTTGAGACATGAGCAGTGGCCATGCATTCACATTCCCGGTGGACTGGTGGGCAGCTCACGCCGCAGTCAGCGGCGCCAACAACTGAAGGGAGTGCTTCCCTGGCGTGGAGGAGAGGTCCACGTCGATTGGGTCCCAACTGAACAATTGGTGTGGCGACGACAGTCCGATCTCGACCTGGAGGCATTTGAAGAAATGGACGGGGCACCGGTGGAATTGGGGGACTCGATCAAACCTCGGGAGCAATCGCCCAAATCGGACTCAACGGACACAAAAGCCGGGACTCGCCCGAACGGACCCGACCCGGGGGGCCTAGGGGGAACGGTGACTCGAATTGGGGCCCCCTCTCGTCCCTCTCCCTCAAATCGTCGAGGTCAAATGGGAGCGTTCGCCGAAGGGAGTGCCTCCTCCCTACAAGAACAGTGGGCAATGGCTGATAACGGATGGGAAAGCAATTCAAATTTTGGCGAAATCCGATGGGAACCGAAAAAGGAGGAAGAAAACAATTTGCAGAACGATAACGCCGACGAGGGGATAGAGGGAGAGGGGGGAAAGACGAAAAAAGGAGACAAAACAAACAAAGATGGGTCCAAAAGTGCAAAAAGACAGATGTCTCCCTCCTCGTTTGCAAACGGGGGATTCGATCAAAGGGAGGGGGAAAACGACGATAAACAGCATAATTTTGGGCGTCATTTTCAATTGACCCGCCCCTCCCCCCAAGGAAAGGGAGCATTCCCCCTTCATTCATCTCCGCACAGCATTCAGGGGCCGCACAATTCGCCACCATCAATTGGGAGATTCTCCCATCTTTTCTCATCCACTTTTTCTTCTAGCACATCCCCAACTGATTTGTCTTCCCAATCTTCAGGAATGGCAAAAGTCGCAAACCGAAAACGAAATGAGCGCCGAATTCGTGCCGTCCAAGACTTGGCGCGGCACCTCAACCACCGAATGAACCGCCACCGCCGTTGGCAGCGCGACGGAAAACGGGACCCATCGGAGGAACGGCACATCCGAATGACCGCCGAACGTTATGCTGATCAGCTCTCTCGCCTGGGAGATGACCACATTCACCGACTGCAGCACCAATTCCCGCAACTCCCCAACCCCCGCCGGCGACGATCAGAGGTGGGGGGCAATCTGAAAGGGGGAAAGTCCCAGCCAAAATTGGCATCGATGGTGGTACGCCTGCCCCAGGGAGAGTTGCTCCCTTCAAAGGATGTCGGCGGCGCAGCACCGGGCGCATCGGACTCCCATGGCCGAAACGAGAACGAAGAGGAAGGCCGTGAGAAGGCCGAGAAGGAAAGAGGCAGCCGCCCGCGGGTGCTCCCTCCGCCTGGGGACAGTTTTGGAGAATTGCTGGAGAAAGAGGCGAAAGCTCGGGCCGAAGTGGCCGAGCTCGAAGCCCGGGCAAAGAAGGCAAAAATGGAGAGGGAGGAGGAGGAACAGAAACTGAAATCGGCGAAGGAAGCGCGCCTTCGGGACTTGGAAACCCAAGCCGACGACTTGCGCCAAATGTTGGGCGATGCGAGCTGGCCGTGGTCGAGAGGCAAAGACGGGAAAAATGGGGAGGCGGTGGCTCCCCGCGCTGGGAAAGCGGTGGCCATGCCAGCAGTGCCGATGGAGGATGATGGAGTGTCACTTGCCGATTCGGAAATGGAGGTGGTGCCGGCCGGGGGCAGTGTCGCAAGAAGCGACGAGATGACCAAAACGGGCGGGAGGTCTGCTCCCGCCAAAGGAGGAAGCCATTCATGGGAAGGTTTTCTAGTGTTCGGAGTGGACAATGGAAAGCCCCGGGAACTGTCACGGGAGGAGGAGGACTATTTCGGAGGGGGTGCGCTCGATCACCCGGTGGCATTTCCCCGCCGGGAGAAGAGAGGAAAAAGAAACAAATGGTCGAACGGGAGCACTTCCCGTCGCAATTGA
>Hetgly06329.t1 gene=Hetgly06329
ATGATCGCCGATTTTCGTCGGCTGTCCGCTTTGGGGATTTCCATCACCAGCGGTGACGGCTCGGGGTCCTCTTGTTGCGAACTTGCCGTTTCATTCGCTCTCATAACGATGACGGGCCCCAATAAGTATACCCATATCAAGGTAGGAGACGAGCAGCCGAAGTTTGTTCATGAACCATTCTTCGGTGAGGCCAATCACTCCGCTCGGGAGAGCTCCCAGTGTGAGCGCACGCGCCGTTTTGTGCTCCTTCTCCTTCGACTTCCATTGATCCAAACGCAGCCATTCGTCCAAGCTTCGTGGATCTCCGATATGCTGCTGGAGTCGCTTTTCTGGATCGTAGCAGTGCGTGTGTCGATTTTGATCCAATTGCTCTGGCTAAGCTGCAGATAA
>Hetgly06330.t1 gene=Hetgly06330
ATGACGGGCCCCAATAAGTATACCCATATCAAGGTAGGAGACGAGCAGCCGAAGTTTGTTCATGAACCATTCTTCGGTGAGGCCAATCACTCCGCTCGGGAGAGCTCCCAGTGTGAGCGCACGCGCCGTTTTGTGCTCCTTCTCCTTCGACTTCCATTGATCCAAACGCAGCCATTCGTCCAAGCTTCGTGGATCTCCGATATGCTGCTGGAGTCGCTTTTCTGGATCGTAGCAGTGCGTGTGTCGATTTTGATCCAATTGCTCTGGCTAAGCTGCAGATAA
>Hetgly06331.t1 gene=Hg324
ATGGCAGGCAAAGGGCTGAACAGCAAATTGTGGATGGAAACGCAAGGCGTCTTCGGCCGATTTCTTCAGTTCATTTTATTAAAAAAAATGATTGGTGCCATAAGCATTTTTGTGGTATTGTTCGTTTTCGTCCTGGCGTTTCTATACGCTTTTTGCTGTTCGCCCTTTGCCTGCCCCCATTCAATCACCGAGGAGGAGGAGGAGGAGGAGGAGGCGGCGGGAGTGGATTTGCTAATGCCCATGACCACTTTTGACTATCTGGCCCCTCCTGTCATGCCTCTTCCTTTTCTGTTGCCAATGCCTTCATCGCCGCCGCCTTACTTCCCTCCTCCGCCCTATTACGATTGCCAGGAGGAGAAGGAGGATGATAGGGCGGGGGAGGGGTGGTACGACGGGTGGTTGCACTTCCACAACCGCTCTTTGGGAGGTTGGGAGTTTTAGGTGAGTTAACCAAATTTAAATTAATAGGCGAGTAATTTAAGCATAGGGCTTATCCGCCTATTTACATTTATTTATTATTTTTTTTTTTTTGCTAATTTATTTAGGGTATTTTTTTTAAATTTAATTTAAGTTGTGGAATGATGGGTGCGCAGAACACAACTCGTCAACAAACAACGAAAGAACAAAGAATGGAAATTGAGAATTGATTGTTAAAAAATAATCTAATAAAAAAAATTAAAAAAAAAAAAGTTTTTTAAAAAACGAGGATAAAGTTCCTAAAAAAAATATTTGAAATTTATAATTCATTAATAATTAATTAATTATTTTTTATAGTGGATGGAGTAGCGATAAAATAAACGAGTAAGATAGATGAAAGAGGAGGTGGGAGGAGGATGAGGAGGAGTAGGAGTGAGGTAGTAGAGAGAGGAGGATGAGGGAGGAGTGAGGCGGTGGAGGAGGATGAGGGAGGAGTGAGGTGGTGGAGGAGGATGCGGGAAGAGTGAGGTGGTGGAGGAGGATGAGGGAGGAGGAGGA
>Hg324.2 gene=Hg324
TTTATTTATTATTTTTTTTTTTTTGCTAATTTATTTAGGGTATTTTTTTTAAATTTAATTTAAGTTGTGGAATGATGGGTGCGCAGAACACAACTCGTCAACAAACAACGAAAGAACAAAGAATGGAAATTGAGAATTGATTGTTAAAAAATAATCTAATAAAAAAAATTAAAAAAAAAAAAGTTTTTTAAAAAACGAGGATAAAGTTCCTAAAAAAAATATTTGAAATTTATAATTCATTAATAATTAATTAATTATTTTTTATAGTGGATGGAGTAGCGATAAAATAAACGAGTAAGATAGATGAAAGAGGAGGTGGGAGGAGGATGAGGAGGAGTAGGAGTGAGGTAGTAGAGAGAGGAGGATGAGGGAGGAGTGAGGCGGTGGAGGAGGATGAGGGAGGAGTGAGGTGGTGGAGGAGGATGCGGGAAGAGTGAGGTGGTGGAGGAGGATGAGGGAGGAGGAGGAGAGTGAGGAGGAAGGAGGAGGATAAGGGTGGAAGAGGATGAGGGAGGAGTGAGGAGGGGAAGGAGGATGATGGAGGAGTGAGGAGGGGGAGGAGGATGAGGGAGGAGTGAGGAGGGGAAGGAGAATGAGGGAGGAGTGAGGAGGGGAAAGAGGATGAGGAGGAGGAGGAGGAGGGGGGGGGGGAGGATGAGGGAGGAGGAGGAGTA
>Hetgly06332.t1 gene=Hg325
ATGGCAGGCAAAGGGCTGAACAGCAAATTGTGGATGGAAACGCAAGGCGTCTTCGGCCGATTTCTTCAGTTCATTTTATTAAAAAAAATGATTGGTGCCATAAGCATTTTTGTGGTATTGTTCGTTTTCGTCCTGGCGTTTCTATACGCTTTTTGCTGTTCGCCCTTTGCCTGCCCCCATTCAATCACCGAGGAGGAGGAGGAGGAGGAGGAGGCGGCGGGAGTGGATTTGCTAATGCCCATGACCACTTTTGACTATCTGGCCCCTCCTGTCATGCCTCTTCCTTTTCTGTTGCCAATGCCTTCATCGCCGCCGCCTTACTTCCCTCCTCCGCCCTATTACGATTGCCAGGAGGAGAAGGAGGATGATAGGGCGGGGGAGGGGTGGTACGACGGGTGGTTGCACTTCCACAACCGCTCTTTGGGAGGTTGGGAGTTTTAGGTGAGTTAACCAAATTTAAATTAAGAGGCGAGTAATTTAAGCATAGGGCTTATCCGCCTATTTACATTTATTTATTATTATTTTTTTTTTGCTAATTTATTTAGGGTATTTTTTTTAAATTTAATTTAAGTTGTGGAATGATGGG
>Hetgly06334.t1 gene=Hetgly06334
ATGATCGCCGATTTTCGTCGGCTGTCCGCTTTGGGGATTTCCATCACCAGCGGTGACGGCTCGGGGTCCTCTTGTTGCGAACTTGCCGTTTCATTCGCTCTCATAACGATGACGGGCCCCAATAAGTATACCCATATCAAGGTAGGAGACGAGCAGCCGAAGTTTGTTCATGAACCATTCTTCGGTGAGGCCAATCACTCCGCTCGGGAGAGCTCCCAGTGTGAGCGCACGCGCCGTTTTGTGCTCCTTCTCCTTCGACTTCCATTGATCCAAACGCAGCCATTCGTCCAAGTGCGCGAATAG
>Hetgly06335.t1 gene=Hetgly06335
ATGGCAGAACAATTTGTACAACATGAAACTGCGGAGGAGCAACAAGTGAAAGCTAAGAAGCCACACGTTGATGAGCGATTTCTTTGGAAAATCACGCGGGGCCAATTTGTGCTTGCGATTCGGCTGTGCTCAGAGGACTGGAACAATTTATTTCACAACAAAGACAAGGCACGTCGGCTGGAAGATGGACGAGTGGCGATTGGACTCGAGATGTGTGAAGAATGTGCCCGAATCAATTGCTGTCGTCAAAAACATCGCAGCAGCGGCACCAACAAAACCATTTCAATGAAATGTGCGTGGCATTTCAGAGTATGGAAATGTCGGAATCGGCAAGACCCCCTGCCTGGCGGATCAATAAATGGACCAAAGTCCTTCGGATGTGCATTTCTGAAAGAAGAAATCGACAAACAGATGACGAATCTGATTTTCACAATCACAAAAATCGAAGAGCGCTTAAACGGACTACCCGACCCGCAAGCGGCGCACCTTTATGGAATAGTCAAGGAGCAGCTCGAAAGAACTGTTCGTCAAATTGAGAAGGACTGCTTGTGA
>Hetgly06336.t1 gene=Hetgly06336
ATGAACCCGTTGGAGACAGGACCACACTTGGGACAATTCACCGATGAATACCCAAAGCATGAAATTGTGGAGTATTGTAGTGGCGGAGCGAAGCAGTATGGACTCAAACTCCGGCGTAATGGGCAGGACGAATTTGTTCTGAAGCTGAGGGGCATCACACTGAACTACGACGTGATGCAGAACCAATCCCTCTGCTACGACACATTCAAAGAAGAAGTGTTGCGATATGCCCAAACCGGAGAGTATGAGCCAATAAATGTGATGTACCCCAACTTTTTGAGACCCGAAATTAGGGGTGGCGGACACGTCACTTCAGGCCCCCTCCAAAAATGTTATCGCCCATATGTAGGCAAAGGGATAGTGGGCCCTAATTATGATGTTCTCAATTTCGGACACATTTTGTAA
>Hetgly06337.t1 gene=Hetgly06337
ATGAAACGCACCAATTTCAACAATGCTCTTCCAATGAGTGAGAAAAAGCCCAAACTTCGTAGACGCCTGCCGGCTGAATTGAATAGCGAGCTGATCAGTTTTGTGCCATTGGTGTGCCTATTTGCCAATGTGAAGCGGGCTCCAATTGACCCTGTTTCCTACCAATTCGAGTGTTTCCGTAATCAGCGTCAAAAGTGCTATGAATATTTGAAGGGTGTTATCGCATTATTCGATGTGATGTTTGAGGAGAAAAGGACACCGAAGAAGAAGAAAGTGGGGAGACTGCATCTACAGGAAGAACTGCCGCATGACCTCAGCCGAAATGAGCTTCTACACTACCTGTGCTACGGACGACTGGGAACGAATTTGTTCGAGACTTATTTTGTGATGACCCAAGCAACAAATTCAATTGCCATTGGGAATTTGTTTGGGCTTCTGCTCGATTTTGCAATGAGCTCACCAACTCCTTGGCTCATGAAACGACCAATTTGCTGTGGAATTTTCTTCCGACAACATTTGCCATGGATTCTGCAACAACCGTTGAACGTAATGCTTTCTCATGGCTTTTTTCCGGAGAATTCTGCCTGA
>Hetgly06338.t1 gene=Hetgly06338
ATGGTACCACGTGATGACTCTATTAACAATAACAATAATGGTCAGCCAGTCATTCAATTTGATCAACAAATTAGCCAGGACCCTGGTCTAAATGCTGTTTTTTACTTTGTTCGGGAACAGGGCGCGCAGCATGGTATTTTCAATACGCCCGCCGAAATCATCAATTACGGGGACCTGCCTGCCATCACATTCCCAAACCACCAAGAACAGCAGCAACAGCAACAACAGCAACAACAACAAAACGATTTACGCCAAAAAGCTAACACGGCGATGGACTTGGTGGAGAGTGGACTGCTAGCTGATTCGTTGCGTGAAGAAGGCGTGCAGAGGGCTGAGCTAAAGCGGAAGGCGAAAGTTGCGCTCGATTTGATTGATGCCGGTTTGACCGGCGATGCACTGCATGAGGAGGGACAGCGTTGGAAGAAGGCCAAAACTGCACTCAGCGTTCTCGGAAACATGTTGTTGGCCGATTCACTTCCGGAAAAGAAGACTGCGGAGCTCCCGCTTCCGCCAGCCGAAAAAATTGAATCACTGCCACTTCCACCACTCGAAAAAATGAAAACGCCCTCACTTCCACCTGCCGACAAAATGCCTTCGCCGCTCCCTCCATCATCAAAAGTGGAAAGTGATGAGCAACAATTCTACGACAGCATTTCTGCGGCTACCACTATGATGGACAGCGCCTCAATGCAGCAGCAGGCGCCGCTGAAGAGAAAACAGCTGACTCCAAAAGGCAAAAGCAACGGTATGAAGAAGGCAGCTGAGCCGCAGCATCATCACAATCGTGCCCGGAGATCTCTAGCGCTCTCTTCGCCTCCCAGACATGAAGAAGCTCCTGCACGACCACTTGAATCGCCTCCTTTGTATGACGAGCCAAAGCTGCAAAAAGCACAAAAAACACCCGAAAAACCAGCCAAAACAGCCCCGGCTACACCAATTCTGCTTGACTCGCCACCGTTGTATGACGAGACAAAGCTGCAAAAACCACAAAAAACACCCGAAAAACCAGCAAAAACTCCAGCTAAGCCACCGTCGCAAGCTCCTCCTATACCAGCAACCCCTACAGCAGCTGTTTCTAAACCGTCTCAACCGATTGCTCCTGTTGCTCCTCCAACACCTACTGCTAAATCAGTAGCAACACCGACTCCAGCTAAAACGGTTTCTCCTCCTCCAGCTAAAACGCCTTCTCCTCCTTCTCCTCCTCCAGCTAAAACGCCTTCTCCTCCTTCTCCTCCTCCGGCTAAAACGGCTTCTCCTCCTCCTCCGGCTAAAACGGCTTCTCCTCCTGCCACTACTATTACCACTACTACCAAGCCAAAAACACCGCCTCCGCTGGTCAAACATAGTCCTCCTCCAACAGCTGCAAAACAGCCTTCTCCCGTAAAGACTACGCCCGCGTCTAAGCTAAAGCCCGCGAAAACGGTTCCAAAACCACCGCCACCTCCTCCTAAACAAAAAACACCACCAAAACCTTCACCGATACTTGAGTCACCGCCTCGACATTTGATACTACCGCAAAAGAAGTGA
>Hg329.1 gene=Hg329
TTTTTTTTTTGAATCAGGCAACACCGCAACTGGACGACAATTGCCCGGGGGACCACCGACACCCATCACAGACCCTGTTGGAGCAGCAGAACAATGCATTGTACCGGCTCCTCTTCGATGGCAGCAAGGAGAACTACTTCACCCATTTGGAGCGAGCCCGTCACCTCGTCCACACATGCGCCGTGTGTGAGAAGAAGTACGAGTTCGTGTTGGTGCGGTTCCCGGACACAGGAGTCGAGACTCCATGGCATCCTGTGTTACCAACGCATCGCAACATTCGTGATGGTTGGACGTTGCTAGACCTAGCAATGTTGGAGCCCGACACAATTTACGCTTTTGACGCAGCATGGCAACAATGTGTTGCACCTGATGATGTGATTGGAGGGAATGAAAATGATGATGGTGGCGATGATGAGAACGGCAGAGGAAACAACAGCGGAGGAAGAAACAAGAAGAAGGGCGGAGGAGGTGGACAGAAAGACGGAGGAGGGAGCAAAGACGGAGCAAATGGAGGAGGAAGAGAAGAGGAGGAGCAAAACGACAACAATGGAAAGAGGGGAGAAAGAGAGAGAGAAGGGGAAAGAAGAGAAGAGGAGGAGGAGGAGGAGGAGCAAAACGGAAACAATGAAGAGAGGGGAGAAAAAAAGAGAAGGGAAGAAGGGAGAGGAAAAGAAGGAGGAGAACAAGACAGAAGAGAAGATGAGGAGGACGAAGGAAGAGGCGAAGAAGAAACAAGAGAGAGAGGAGACGAAGAGGAAACGGAAGAAGCAAGAGAAAAATTGAAGAGAGGTGAAGAAAAAGGAGGAGGAGAGAAAGGAGGAGGAAAAGCCAAAGAAGGACGAAGCGAAGGAGGAGGAAAAGCCAAAGAAGGACGAGGAGGAGGAGTAGGCGAGAAGAAACAGCCGCCGCCCGGGTCAAAAATGACCCACTCACAGTGGCGCAGAGTGATGCGCATTAACAAAAAGAAAGGAGTGAAGGATGGACGAGCCAACGCACATCCGACAACAATTTTCAATGTTTTATAATTTTTTCGACAAATTTTCAATGTTTTATATATTTTTTTTTTGTTTACCAACAATAACAACATTTCTTATCTCCCATTCAAATCTTTAGGGATAGTGGATCAAAATAACAAAAGAAAAGAAGGAAAGGGGGTTTGGGAGGGGGGGGTCCAAAACAGATCCACGCTCATTCATTCATTATTCACATTTATTAAAAAATGGAACCAACAAATACAACTTGGACCATTGAGCAAAATTGTTCTTGCAACAATGATTTGCTTCAGTGCGTCCGGCCCCTGTACTACAAATCACCCGTATTGTGTGTGCCCATTGAATTTGGCACCAATTTTGTGCACCATTTGACCCAATTTTCAAAACCCCCGTCCCTCAATGTCCCACTTGTTGTTATGGTCTTACTGATTCTGCTCCAGGTATAAACCCCCTACAAATTATTTATGTTTGTATGTGCAATTAATATTTTACAGTTGTAAGCCCAGGACGTTTCCGTTCAACAACAAAGCAGTGATGGATGGGTTGCCAAACAACAAGCGCAACAAGGACAAGCCGTTATACGGTATTTGTTTTTGTTGAAAATTAAAAAATATCACAATATTATTATTATTATTCAGCTTTGGCAAGCATCCCGGAGGAGGAGGAGACAAAAAAGAATGGACGTGAAAAGCCGGCGCTCGTGAAGGATGACAAATATGAGGACAATTATTTTGAGGATTGCTATTACCAGTCCACTTGGGTCTAGGCAATAATTTTTCATATGCATATTTTTTTTTTGCTAAATTCAATAAACATATTGTTTAATTGTGCCTTCCCAGATTTATTTAAAAAATAATCCCATCACCACCAAAATAATTCCCATCATCAATACCGATTCACAAGCAGTCCTTCTCAATTTGACGGACAGTTCTTTCGAGCTGCTCCTTGACTATTCCATAAAGGTGCGCCGCTTGCGGGTCGGGTAGTCCGTTTGAGCGCTCTTCGATTTTTGTGATTGTGAAAATCAGATTCGTCATCTGTTTGTCGATTTCTTCTTTCAGAAATGCACATCCTAAAATTATTAAAAATTACAGTAAGAACTGAAAATGCATATCAAAAATTGTTCTACCGAAGGACTTTGGTCCATTTATTGGTCCGCCAGGCAGGGGTCTTGCCGATTCCGACATTTCCATACTCTGAAATGCCACGCACATTTCATTGAAATGGTTTTGTTGGTGCCGCTGCTGGCGATGTTTTTGACGCTTCACA
>Hetgly06341.t1 gene=Hg329
ATGGCGCCCGGGGGCAAAACGTATGCTCGACTTAAAAATGCATCAAAGCCCATCGGCTCGTCAAGTTCATCGTCAGAGGATGAACTTCCCAGCAGGAAAAAAAGGCCACTACCAACCATGAAAGCACCAATGAACGTTGCGAATCGAACCGGCCTGGGCACCGACACTGCACTGGTCCAACAGCCAGCACCAAAAAAATTGCCCATTACACGCAAAAGCGCCAAGGGAAATGCCGCCGCACCATCCTCCTCCTCCGTTTCTGTCCGCAATCCAACGCGCCGCGCTCCTTCAACCCGTAAAGCTGTTGCACAACAACCGCAACAGCACAAATTGGAAAAGCGAAAAGCGGCAACACCGCAACTGGACGACAATTGCCCGGGGGACCACCGACACCCATCACAGACCCTGTTGGAGCAGCAGAACAATGCATTGTACCGGCTCCTCTTCGATGGCAGCAAGGAGAACTACTTCACCCATTTGGAGCGAGCCCGTCACCTCGTCCACACATGCGCCGTGTGTGAGAAGAAGTACGAGTTCGTGTTGGTGCGGTTCCCGGACACAGGAGTCGAGACTCCATGGCATCCTGTGTTACCAACGCATCGCAACATTCGTGATGGTTGGACGTTGCTAGACCTAGCAATGTTGGAGCCCGACACAATTTACGCTTTTGACGCAGCATGGCAACAATGTGTTGCACCTGATGATGTGATTGGAGGGAATGAAAATGATGATGGTGGCGATGATGAGAACGGCAGAGGAAACAACAGCGGAGGAAGAAACAAGAAGAAGGGCGGAGGAGGTGGACAGAAAGACGGAGGAGGGAGCAAAGACGGAGCAAATGGAGGAGGAAGAGAAGAGGAGGAGCAAAACGACAACAATGGAAAGAGGGGAGAAAGAGAGAGAGAAGGGGAAAGAAGAGAAGAGGAGGAGGAGGAGGAGGAGCAAAACGGAAACAATGAAGAGAGGGGAGAAAAAAAGAGAAGGGAAGAAGGGAGAGGAAAAGAAGGAGGAGAACAAGACAGAAGAGAAGATGAGGAGGACGAAGGAAGAGGCGAAGAAGAAACAAGAGAGAGAGGAGACGAAGAGGAAACGGAAGAAGCAAGAGAAAAATTGAAGAGAGGTGAAGAAAAAGGAGGAGGAGAGAAAGGAGGAGGAAAAGCCAAAGAAGGACGAAGCGAAGGAGGAGGAAAAGCCAAAGAAGGACGAGGAGGAGGAGTAGGCGAGAAGAAACAGCCGCCGCCCGGGTCAAAAATGACCCACTCACAGTGGCGCAGAGTGATGCGCATTAACAAAAAGAAAGGAGTGAAGGATGGACGAGCCAACGCACATCCGACAACAATTTTCAATTGCGTCCGGCCCCTGTACTACAAATCACCCGTATTGTGTGTGCCCATTGAATTTGGCACCAATTTTGTGCACCATTTGACCCAATTTTCAAAACCCCCGTCCCTCAATGTCCCACTTGTTGTTATGGTCTTACTGATTCTGCTCCAGTTGTGTCAAATCATCCTCACTTTGTTCTATGGTTATCGCCGTCGTCGCCGTCGACCACGTGTCCGTTTTCCTACCAATGACACTCCGCTCTCGCCATTGCGCCGCTTTCCTCCACCACCGCCGCCCTCAATTGCAATTCGGGCAACAACACAGAAAGATCAGCACCACACGGATGAGCGCAAAAATGAACAGTTCAAAAAGAGTGAGGAACCGAAGGGGGCGGAGGACGGACGGCGCAATTTGCACAACTCATCGGTGAAGCCCAGGACGTTTCCGTTCAACAACAAAGCAGTGATGGATGGGTTGCCAAACAACAAGCGCAACAAGGACAAGCCGTTATACGCTTTGGCAAGCATCCCGGAGGAGGAGGAGACAAAAAAGAATGGACGTGAAAAGCCGGCGCTCGTGAAGGATGACAAATATGAGGACAATTATTTTGAGGATTGCTATTACCAGTCCACTTGGGTCTAG
>Hetgly06342.t1 gene=Hetgly06342
ATGATAGGCACCAAGAAACCGCGACACTTCATCGTCGGCGTGGCTAACAAACGGCTGATGTTGGCCAAGGACGTGGTCAATTACAAATTTCATCACAAAATCTCAATCGATGATTTTGTACGGGAAAATCAAAAGTGTTGGAAAGTGTTTCGGCGCAAGGACAAAAAGCCGGCATTGGGGCGATTATGGAAAAAAATTCTTCCAGGACCAAATGGACGCCAACAAAATGATTCAGAAAGGCTATGTGAAGCTGTGGACGCCAACAAACCGTTGCCTCCTCAAAATGTGCCGGATTTACAGAAAGATACCCGCCCAAAGTAA
>Hetgly06343.t1 gene=Hg332
ATGCTGAGCGAGTACATTCGGGACGGTCTTGAGCTGGAGGAAATTGAGTACCTGAAGATGGCATTCAAGGACTTGGACCTGGCCGATTTGTGTGCGGACATCAACGAGTCGGCCTTACAAAATGTGCGTCGAATGCCGTGTGCCGATGCGGCGGATGTGCAGGCGCAACAGCCGTTTGTCTGGGTGGAGCCGGAGGGCATTTGCGAGACGCCGAATGTGTTTCCCAAACCGTACACGGATGCCAGACGGCCGGGCTCCATCTACTACTACGTGGACGCGGAGCTGGAGGGCGTCATGCCGAACCGGACCGGCAGTGCCCGGACCGAGGGACACTACACGCGCAAGAGGGACCTGGAGAAGGAGAAACTGCTGGCACAAGGCATTCAGAGGCGAGCGCTGATGCGACGAGCGGCTGCTGCTGCGGCGGATGATGATGGTGGTGATGGAAGAGGAGGAGAGGAAAAGGAAGTGGTGACCGCGCCGAAGAAGAGGAAGAAGAACCCAGTGGCAGGCATGGAGGAAGAAGAAGAAGAGGAGGAGGAGGAAGAAGAGACGAATGGCGTGCCCTTATCCTCGTCGTCCTCATCAGCATCATTGCCTTTCATGTTGCCGGCAATTTGTGGTGGTGTTGCTGGCGGTTATGGCTCTGGTGGAGATGGTGGTGTAATGCTTAAGACTCGCTGTCCCATGTTGCTGGCATCGCATAAAAAACCCTTTATTGTTACCGCCGCTGCCTCCGCTTTGGCGGCTAATGCCTCCGTTACAATTAACCATACTGTTGGTGCTGATTGTCGTGGTGGTAACTTTGTTTCACCGCCTCCGTCGTCGCAGTGCCGTGATGGCACTGTTCAACCGGCTGGCACATCGTCATCATCATTGTTGTTGTCCACCACGTCAGCGAGGAGCACGGCGCAATCGAAGTACCGCTCCAAGATGATCAAGTTTGCCCGCTCGCGCATCCACGGCTGGGGCCTGTTCGCGCTGGAACCGATTGCGCAGGACGAAATGATCGTGGAGTATGTGGGCGACAAAATCCGGCCAGAGGTGGCCAACGTGCGTGAGTTGGCCTACGAGCGGCAGGGCATCGGCTCCTCCTACCTGTTCCGCATTGACGACCACAATGTAATTGACGCCACCAAAAAGGGCAATTTCGCGCGGTTCATCAACCATTCGTGTCAGCCGAATTGCTACGCAAAGGTTCTGTTGGTTGCTGGTGAGAAGAGGATAGTGATCTACAGTAAGCGGTTCATTGAAAAGGGCGAAGAGATTACGTATGACTACAAATTCCCGCCCGAGGAGACGAAAATCCCGTGCCTGTGCGGTTCGGCCCAATGCCGTGGTTACCTCAACTGA
>Hg332.2 gene=Hg332
GTGAGTTGTGGCATTTCACGTTCTCTATAATTTTATATAAATTATAGACATTTCATTCCATACATGCAAAAGGGGGGGGGTCGCCGGCGAAGGGGAAAAGAAGGAAATTTCTGAAAAATTTGGCTTTTTTCTCAACAAAATTTGCTAGAAATTTTCAATTTTTCTTCCGGCGGCGCCTATCGGCACCGCCGGACTCAAAAAAACCCTATTTTTTCTTAACAAAAGTAGCCCAAAATCTCAAAATTTGGTCATTTTTTAGTCAAAATCTGGTAGCAAATGGCACTAAAAATACAAAATTTTTCCCGGCGGCGCCTAACGGCACCGCCGGACACCCCCCCCAAAAAAAA
>Hetgly06344.t1 gene=Hg334
ATGTTCAATTTTGAAAAAGATGCCTGGCGCCGTGATTTTATCGGCCAAAACGTAGTTGCTGAATCACCCGATGTCAAAATTGAGCCGCCGGATGAGGAATTGGTGCACGCCGACCACCCGATGCCGGAGTTCAGAATTTTGGCTAAGATTTTCGACTATTATTGGGCTAAATACATAAGGCCGGGAGCGCCCCCCACCTTTTGTGGCCGGCATGGGCCCTGGAGTGCCCCCACTTTCGTCGCCGGCATAGGCCCTGGAGTGCCCCCACCTTTCGTCGTCGGCATGGGCCCTGGAGTACAACCTCCTTTTGGGGCTGGCATGGGCCCTGGAGTGCCCCCGCATTTTGTCGCCAGAATTGGGCCTGGAGCTCCTCCGCATTTTGTGGCCGGCATGGGGGCGGGCGCGCCCCCGCTTTTTGCGGTTGGCATGGCGCCGGTTGCGCCCCAGCATTTTGTCGCCGGAATTGGTCCTGGAGCGCCACAGCATTTTGCCGTTGGGATGCCCCCAGCCGCACCCCCACCACTTGTTGTGGGAATGGCGCCGGGGGAGCACCAGCATTTTGCGGTCGGAATGCCACCGATGGCGCCACAGGGAGCACCGCGCCCACTCATGGGTGAAGTGAACTACAGGCCATTGAGAGGTGTTTTTGAAGCGCATCGCGCCCACCCGCAGCAGCGTAACGGTCGTTGGCCTGTGCGTCCGCCAACCCCTGGCGTGGCACTGAGGGACCCGCGCCTGAGGCGTCGTCGTCAACTTCTCGAGGTCGTCCCAGAGGAAGATGAACCTGCGGCGCACAGATTTCAGAACGAGGACCACGACCCACCACAGCCGCCGCCGCCGGGTGTTGGAGCATGA
>Hetgly06345.t1 gene=Hetgly06345
ATGCGTACGCCTCGGACGCGTACGCCCAAGCACGACGACGACGACGACCGCGTCCCCCCCGCCACAGACGACGACGACCGCGAAAGGCTCAATGCGTACGCCTCGCGTTGTCGCTCCCCCCCCCCCCCCGGCGCACGCCCCCCCAAAAAAGGCTCAATGCGTACGCCTCGCCTCGACGCGTACGCCCAAGCACGACGACGACGACGACCGCGTCCCCCCCCCCCCGCCACAGACGACGACGACGACCGCGTCCCCCCCCTACAGACGACGACGACGACGACCGCGTCCCCCCCCCCTACAGACGACGACGACGACTACCGCGTCCCCCCCCCGGCGCACGCCCCCCAAAAGGGTACTGTATACGCCTCGGACGCGTACGCCCAAGCGTACGCCCCCCCCGGCGCACGCCCCCAAAAGGCTCAATGCGTATGTCGCTCCCCCCCCCGGCGCACGCCCCCCAAAAGGCTCAATGCGTACGCCTCGGACGCGTACGCTCACGCCCAAGCGTACGTCGCGCCACCAGCGCTTCGACAGGGCGTACGCCCTCACGCCGCCGACCGCGTCCCCCCCCCCCCGCGACGACGACCGCGTCCCCCCCCCCCGGCGCACGCCCCCCAAAATGCGTACGCCTCGGACGCGTACGCTCACGCCCAAGCGTACGTCGCGCCACCAGCGCTTCGACAGGGCGTACGCCCCCA
>Hetgly06346.t1 gene=Hetgly06346
ATGAATGAGCTTTTGTCCAATCTGTTGAATGGGTGCCCCGTCCCCGCTATTGCTTCATCAATTTGCCAATTGCTGTTGATGGAAGTGCCAAAAGGCGGAAACAAAGCTCTTCGACGTGCCAACCTCGATTCGGCCCAATCAATTGACGGCAACATCGGGAACAAGCGCCGACGAACGCGCAACGAGGGCAATCAGCAACAAAACCCGCAACCGCCCGAGTTCCCACCAGTCATTTTGGCCGCACATCACTCGCAACCACAACATCAATTACTGAATCAGGGACATTCGACAGGCGCCTTTCCATTTGTTGACCCTCAGCAACAGCAACAATTGACGCCGCAGCCATTGGGCACGCCGGCCCGGGTTTCAGTGACGTATACGAAGCCGTTTCCGATGCTGGAGCAACAACAGCCGCAGCGCACCCAAAATTTGCAACAAGGCGATGAAGCGGCGATCATAGAGCGCGTCCGTCAGCGACAGCTCGCAGAACTCGCTGCAATGGAAGCAGCTCGACCCATCCCGGAGGATCTGCAGTACTGTGCCCCGTACAATGCCTATGGGCTGACCAGCATCGGGTGGCTTTTGATGGGATGGCGAGAACAGATGCGGCCCATGGGGGGTGACAAGGCCAAATTCAAGGGCCGAAAGCTGATTCTACAATTTGACAAGGATGCATCTCAGCTTCTCACCGTCAAGGAATGGGAGAGGGACGACGGCCGGCCCAGCGAGTTGGCCAGAGCGCAAGCCAGAGACCGAGTGCATTTGCAGCGATTGAACGTCTTTTCAACCATGACCATCATTTCGCATGCGGGGAACGAGTGGGCCGCAAACGCAACCGTACCGCACAACTTTTTTGGCATTGTTAGCAATCGCGCCGATGGAACCGGGAGTGCCAATGTCCAACAGCAACAATCACAACAGCATCAACAGGGAACATCGGCGGCGCTGCATGCGCAAGTGGGCCAAAATGAAGAAGAAGAAGATGATGAAGACCTTTTGCTGTGCATTGAAAAATGGCCAGGAATTGTCCGGCGGTGA
>Hetgly06347.t1 gene=Hetgly06347
ATTGGTTTCAAAGTGTAAAATTGCTTGTACTGCTCCGAATCGTTGTTGGGAGCCCGTTCACTTTGACAACCCAAATCTTTGTCTCGGCGCTTCCATTGACCCAAATACTTTCTACAATTATCTGTCTTTTTCCGAATTGCACGTCATTTTGGTCCTCTTTTTTCAATTTTTGATTGGACTTCTTTGTGGATTGTGCCTTTTTTACGTCATTGTGAAAATTTTTTGCCGTGGGCAGCGCAACAATCATAATTCCGTTCGTCGTGCTAATACTCTCCCGCGCTCTGCTCGTACCGGGAATCGTGTGCCGCCTCCCATTCCTTTGTCCGTTCCTGTCTCAGTTTCGGTTGTTTGAAGCACATCGGCACTTTACATTTGCCACGGACTCTTCCATTGTTGGGATCATCACTTTTTTTATAACTCTTCCATTTATTGAGA
>Hetgly06348.t1 gene=Hetgly06348
ATGGCTAATGCTTTTGACACGGATTTAGAAGTGAAATTTGAAGTATTAAAAACCAAAGTGAATGATTTGGAGGAAAAATTGGCAAATAAAATTTCCACAAATTTACCCTCAGGAGTTAGGGTACCAAAATTTGATGCCACCGGGGATTTCCACAGTTTTTTACGAGATTTTAACATCTTGGCCACCGCTTCCAACTGGCATCCACCCGACTGTGTCAGGATGTTGCCACTTTTTCTTGACGGTGAAGCAAAAGAATTATTTTTAAATATCCCATCGGACAAGAAAAAAACATGGAGAGAATTAACGGATGCTCTGGCAGAACAGACAAAAAAAATTGATGGGCCAATGTGGGCCAAGAAAATGCTCGCGCGGGTAAAAATGGGTAACGAAAGCATTACTGAGTTTGCCAATAAAGTGAGGGAATTGGTCGAACAAGCATCACCAAGCCCTAAATACACAAAAGAAGCGCGGGAGGATGAGAGTCCATTTCCCAGGCCAAGAAAGTGGTACAATGAGAAAGTTAGCGCAATTGCTGTGCGTAATACGGGAATAATGAGAGAAACAGTCGAGAATTTTTTAATTCGAATTGGAAAGGAAATAATAATAATTACGCCCAAACGAGAGGGTATGCAAATAACAATTGGCGAGGAAATCAAAATA
>Hetgly06349.t1 gene=Hetgly06349
ATGGTGGTAATTGCTCTCAGTTTGGCTGCGCACTTACGCCGACGTTTGGATGATTCAAACTCCACAAAAATTGAGGATGCCATCATTTCGCGGCATAAGCCCCGTTTTTGGAGGTCGCTTACCGACTATTTGTTGTGTATGCCGCTCGTTTCGGTGATCAACTCATTTTTGAAGCTGAGTCTTTGCGAGTTGAAAGTGCGCTTCCGCGAACGGCTGACTCACCACTTTTACGTGCAGTATTTGGACGGGTTCACCTTCTACAAAATGACCAATTTGGACAACCGCATTGCCAATGCAGACCAATTGCTGACACAGGACGTGGACCACTTCTGCGAGGGCATCGTCGAGCTGTACTCCAACCTTTTCAAGCAATATAATGGCACAATTTTAAACACCTTGTCGGCCGAGATTTTGATCTAA
>Hetgly06351.t1 gene=Hetgly06351
ATGAATGAAAGTGGCAAAGCAAACGCAAATATCGCGAAAGAGAATGCATTGTGCGCGGAGACGATGAAAAACAAAGAAGTATCTGGCAAACTCGGAGGCTCCAGCAAAAAGTCTGCAGTTGCTGCAGAAAAGAACCAACGACGTAACCGAAACAAGAATGCTGAGAAAAATGTTAACAAGAATGTTGTTCGTGAAGTTTTGGACGCCGCAACCATGGAGCCGATGTCTTCACAGACTGCAGCAGAGATTGAAGCAAACGCAAATATTATCATAACCAATGCGAAGAAAGGAAAAAAGAAAGAACAGAAGATTGCAAAACAGCGTCAAAAGAAGCGGCTGAGCCAAATATCCAAAAGAAAAAGAAGAACCTGCGCCGAGGAAATCATGAACGCAGGCAGCAAAATTCAGGATTTGAAAAAAATAAGACTGCAATTAACGTGA
>Hetgly06352.t1 gene=Hetgly06352
ATGGACAACACCCACAACAACAACATGTCTTCTAAACAAATTCCATCCGAGGGCAACCAGCCAACCGATGTCCAATTGTCTGTAGCCCCTGGCAGCAGCAGTTCCGTTAATGGAAAAGACCACAAAATCTTCGTGGAAAATTGCAAGGTTGTACGACATGTCAAGAACAAACATTCGCGCTGTTTTGGCTTCGTGACCTTCGTGTGTACCCAGACTGCCGCAATAATTTCGGGTGGACCTCATACCATTGATGGGAAAGTTGTTGATGTGAAGCAGATGGAGAATCAGCAGCCAAAAAATAAGCTTGGCAACAAACGCACTCGAGTGGAAAATTGCAAGGTTGTACGACATGTCAAGAACAAACATTCGCGCTGTTTTGGCTTCGTGACCTTCGTGTGTACCCAGACTGCCGCAATAATTTCGGGTGGACCTCATACCATTGATGGGAAAGTTGTTGATGTGAAGCAGATGGAGAATCAGCAGCCAAAAAATAAGCTTGGCAACAAACGCACTCGAGTATGCTGCAGCGCTCCAAAACGTAGTCGTCAATCTATTGGGATTAAAACGACGCCTGACCATCAAAACGAACACGTTCATGTCTATTCAAAGCCTCAAAACAGAATTCAATTCAGCCAAGGAAATTTTTTGTTCAGTTCTGACACACTTCTGGAATTTGTTGACCCTGATGAAATTTCTCTAGAGCAGTACATAAAGAGTGATGATTTGAAAAGATGCAGTGTCCCCAGGCCCGAAGGAATGGATCTTTGGGAGCGTGATTCGGAGTGTGGCAGCCCAAAGCGTTAG
>Hetgly06353.t1 gene=Hetgly06353
ATGAGTAACGGAGGATGGGCCATGGGGCCAGAAAAAGAAAGGCCGGTTTGTGAAAGTGACGAGAATAGTGAGTTCGACTTCTCCGAAGAAATGCAGCAGTGGCAAAGAGAGTTGGTGGGCAATGTGGTGGACAATGTGAGGGCCAACAATACTCAAAACAGTGAAAGGGCATGCCAATTAGAGTTGGAAGCAGGTCCATCAACTTCGACGGCACATTCCACACCGGCGGAAAAGGGCTTTGGAGGTACAGTAATTGGTGTAGAAACTGTGGCACCAAAGGAGAATGGATCAGCAAAGGCAGTAAAAAGGTCGCACACTGATTTGCCGCCAAAGGCAAAGGCACAAACGGGTTTGCCTCAAAATGGGTTTCAATTTGATGCCCTTAAATGGGCCCAGATATTGCGTACTGCGGTGGTGGTGCCCTTTAACCAGCAGAGTTGTTCGAGCAGTTCAGTTAATGGTGTACAATTGATGCCAACCAATGGAGAAATGATCGTAACTCCATGCCAACAGCAGCAGCCGCAACATCAAAGCCAACCACAACACCAAAATCATCAGCAACAGCAGCACCAAAACCAACAGCAACAGCCGCAACACCAAATTCAACAGCAACACCACCAAATGCATCAGAATCAACGCCAAAGGGCAATTGAAGGGGAAAGCCGATTCACACCGCGGCGTTTTGGCCCGAATCGCTCTCATCCTTATGGAGGCCGAACAACTGCTTCCCATCCGTTCATTAGGGAACAACAGGAAACACAACTCCCTATCAATTGGCCATGGAATCCCCTTCCCCGAATTCAAATTCCAGTCGAAGTTCGTCGTGTCCTCTTGCACCGATTAGCACAGGAGCGGGATCATGCCTTTGGTCTTGCTGGAGTCATGCGCCAATGGAATCCACCAATGGCCCTTTTGTTGCTGTCAATGGAAGCTTTCTACAGTACTCTTTTGGCATTTGTAGTGAATGAAGGCGAGCCGGGGCCATCACTTCCCCAACTTTAA
>Hetgly06354.t1 gene=Hg339
ATGGAAGAAAACAAATTTATCATAACAGCTCAAATGGCACACAGATTTTCTGTGATTGATTTCGATCACAGTGGCAAAATAACAGCATTAAAACTACAGAAATTTCTAAGAAATGGCACGTCTCGGCTCTTCAATCCTGAGACTTGTCGTTTGGTAATTACACAATTTGATGAACAGCATTATGGCTCCATCGACATTACAAAATTTTCAGCACTATGGAATTATGTAAATGAATGGAAGTGTGACTTCATGTGCTTCTCTCAAGGTTTGGGCTTTCTCAGTATGCGTCAGCTACAATATGCGCTAACCCGATATGTTTCACAACGCCTTTTTTCAACATTTTACTTCATCGTTTTGATCGGTCAAAAACTGGTTGTATGTTTTTCGATGATTTTATTCACCTCGGAATCATTCTTCAACGTTTAA
>Hetgly06356.t1 gene=Hetgly06356
ATGAACAACAACGGAAAAAATTCCAACAATTGTGACTCTGCGGATGAAGCAAGGCGGAGTAGGAAACGCGATCGGGCTGATCTCCTGCACGAAGTCGAGATGGACAAAATCCGTGAAGAGAAGCGCCGCCGTAGGCAGAGACGAAAGAATGAAGAGGTACAACGTCAACGTGCTCTCCTTCGCCTTCGGACGGACTACCGTAATGCACGGTGTGCGGTATCAACAGGACAATACCGTATGTCGTGCACTGGTACGACAACTTTTGTGGCAATTCCTCAAATTGGTCAATCTCGCGGGCAGCCGGCAATGCCATTTACGTTGGCTTTTTCGTACGAACCTGCACTGCCGATTGGGGCACCAGTTGACCTTTTCGGACAATCTTTTGTTGGTACTGCTCCCTCTCCTGCACCTACAGTTGGTGAAATGTCGAGTAACCAAACAAATGTTTCCAAATGTGGAACTCGTCCAACTGACCCTAGAGCAGGCGTCCGTGGAGGTGGCGACCTAGCACGCATGAATATTGCCCCCGGAAAAGTTTTCTCGAATTACATTGTTGGTGGGCCTATTCAAACGAATTCCGGCGTCGCAAATGTTTTGCCGGTTCGCACTCAGTGTGGTGGCGGTGGTGTTGGTGGTGGCGTGCCTAGTGGTGCGAATTCCGGCGTCGCAAATGTTCTGCCGGTTCGCACTCAGTGTGGTGGCGGTGGTGTTGGTGGTGGCGTGCCTCCTATTGGTGCGAATTCCGGCGTCGCAAATGTTCTGCCGGTTCGCACTCAATG
>Hetgly06357.t1 gene=Hetgly06357
ATGGGAATTGGGCAATTTCAGCTTCAACATAAACTTGCTCAAAATGTTCTCTTTGATAACGATGACACTTCGCACTTTGACCCATGTTTCCCCGGGGATTTGATAATCGGCGGAGTATTCCCCGTTCACGCGAAGGGCGGTGGCACTTCGCCCTGCGGAGAAATATTCGAGACGAGGGGCGTCCATCGAGTGGAAGCCTTCCTCTACGCTTTGGACATGATCAACGCACAGACCGACTTCCTACGCGGCTATAAATTGGGTGCTTTGATCCTCGATTCATGTTCAAACCCCGCCTATGCGCTTAACCAATCGCTCGACTTCGTCCCTGCGCAGACGGTAGACAGCCGACGCTGCGGCACCCGAGCCCAAAAAAAGAGTGTGGTGGCGGTGGTGGGCGCGAGTTACTCATCCGTTACTGTACAGATTGCCAATTTGCTTCGACTGTTCCGAATTGTCCAAGTCAGTCCAGCAAGCACAAATGCGGACCTAAGCGACAAAAATCGGTTTGAGTATTTTGCGAGAACGGTGCCCAGTGACAATTACCAGGCACGGGCGATGATTGACATCGCCGTGCATTTCAGCTGGACTTACCTTTCGCTGGTTTATTCGGCGGATGAATACGGCGAATTGGGGGCGGATGCGTTCAAAAAGGAGGCGCGAAGGGCGAACATTTGCATAGCCATTGAGGAGAGAGTGTCGATGAAGCCCGAATCATTGCGCGACTTAATCGCCAATTTGGTGAAGAAGCTCCAATCGGACAAAAAAAGAGGGCGCCCGCGTCGTCGCCCTTTTCGTCGGCACCGAATACATCGCACCGCTTCTGCAACAGGCAAATTTAGAGGAAAAGTTGGACTTATTCAAGTGAATTACGCAGGAAAGGAAACGGAAGAGATGAGAAAAGGGAAACGGACACAAATGAAAAAGCGAATCATTTGGTTGGCCAGCGAAGGATGGGACCGTAACAACGAACAGTTGCCCTCAGGCATTGCGCGGATTTCCCTCACTGCTTCTCGCCTGCCTTCCCCCTCCTCCTCTTATCTTCGAAATCAATCTCCGAGTGTTGAGCAAACGAACACTTGCGATTTTGTCCGCTAA
>Hetgly06357.t2 gene=Hetgly06357
TTGACATCGCCGTGCATTTCAGCTGGACTTACCTTTCGCTGGTCAGTGTCACTCCGAGTTTTATCTTCTAAATTGCTTCTATTTTTTACCTTTTTGAAGGTTTATTCGGCGGATGAATACGGCGAATTGGGGGCGGATGCGTTCAAAAAGGAGGCGCGAAGGGCGAACATTTGCATAGCCATTGAGGAGAGAGTGTCGATGAAGCCCGAATCATTGCGCGACTTAATCGCCAATTTGGTGAAGAAGCTCCAATCGGACAAAAAAAGAGGGCGCCCGCGTCGTCGCCCTTTTCGTCGGCACCGAATACATCGCACCGCTTCTGCAACAGGCAAATTTAGAGGAAAAGTTGGACTTATTCAAGTGA
>Hetgly06358.t1 gene=Hetgly06358
ATGGACTTCGGCGAAAAGGAGTCGGACCACTCGGACTTCGACCCGGACGAATTGGTCTTCGAAGTGCCAAAGGAAGGGGAGTCAAACAGTGAACGAAAGGTGGCGCGCTGGCCCGAAAACTTCCCACGGCAACTTCACGGCAGTTATTCGGATTCGAAAGAATACGCGGCACCAAAAAAGGGGTCATTAATCAAAAAATTAATGACACTGGTTATGATTGCAGCACTGCTACGGCCCACACAGCAGCAATCCGCCATGGTATGCAACCTGGCGGCTCATACACAACTAATGGAGCTGACCAACAACTTCCAATGCAACCAATTAATGGCGACGAAACAAAACGCCACATTGGAAGTGTTCAAGCCCGCCAAGAGGGGAGCGCAAAGAGCCAACCCAGTGGTGCGCTATGAACGAGCGAGACGAACAAGACCGAAATCAGGACTGGAACAATCACTGGAGGAAGCAACGCGGCAGTTGGAAGAATATAGACGTGTGACAATTTCAACTCCGGGGGGAGTGTGTTGA
>Hetgly06359.t1 gene=Hg340
ATGGTCCGCACTAAACAAAATTTTCCAAAAGATTCTCCCTGTTGCTCTTCTTCTCTCCAGGATTTAGACGCCGAACCGGTTCAAAGCTCCGGAAAACAAAAGCGGATTGAACCGGTTCAAAGCTCCGGTAAACAAAAGCGGATTGAACCGGTTCAAAGCTCCGGTAAACAAAAGCGGATTGAACCGGTTCAAAGCTCCGAAAATACCAGAAAACGCAAAAGGGAATTTTGTTCGTTACACTATCTCGCCGCGACAGAACATCAAAATACCGAATTTTATCAACTTGGCAAGTTTAATATTAAATGTTTGGAATGTGATAGCTTGCATTTTCCGGAAGAAAAAGCAATAAACTCAAAAGAGAATGTTTTTTTCAATTGTTGTAAAGGTGGAAAACTTATAACTCTTTCTGATCGGTTTGATGAATACCCTGAAGAATTAAAGGCTTTGTTTTTTGCAAATAATCCTTTTTATAAGAATTTTATTAAAAATATTAGAAGGTATAATAGTATTTTTGCCTGTGCATCTATTAGTTGCTTTAAATTTAAATTTCCAACACCGGGTCCGCCCTGTTATAAAATTCAAGGGCAAATTTACCATAAATTCAATCCAAGTGCGATGCCAAAAAATGAAAAAGATCTTCCTACAAACGGCCAACTTTATTTCATTGATTCAGAAGAGGCTATAAATATACGTTGTGAAATTGATAAGGAATGTCTCCCGGATTTACTGGAATATATTGAAAAATATTTACGAAAAAATAATCCATTCGCACAGTCATATTTAATGATGAAAGAAGTGTATGAGCAAGAAGAAAAAAAGTGTAAAGAAAGAGGCTATAAAATGCCTAACATAAAGTTACTTTTTAGCTTAAAGGAGAATTATGACCAAAGGAGGTATAATATACCAATGAGTAACGAAGTTTGCGCTATAATGGTAAGTGATGCTAATGATGATGTTCCCCCGGCAAGAATAGTTGTATATCCGAAAGGACAAAAAGAATTAAAAGAAATTTACCCATTAGATAAATGTGTTGATCCAATGTGTTATCCCTTGCTTTATCCGACAAATATCGAAGGATATAATGTTAACATTAAAGATACAACAGGAAAAAAGGTGTCGTTATGTGACTACACTAAATTTTTTTTGTTTTTTCGAGAAAATGAAAAGTTTTTCCCTCATTTTTATGCAAGCAAACTATTTCAACAATGGTTAGTAGATCAAGCAGCTAAAATCGAGTGGGACCGTTTAGAATATATAAGAACACATCAAGCTGAACTATGGAGTAGCAATTATTTAAATGTTGAGGATTTTCTTAAAAATAGAGCTTCAAAAACCGGGGCAGAAATAAGGAAGAAAGTTATACTTCCGTCAACTTTTTCTGGAGGACCCCGCAGTATGCATGAACATTTTATGAATGCGATGGCTATAGTAAACGAATCTGGCAAACCAGACTTATTTATTACGTTTACATGTAACCCGAATGACCCGGATATTTTAAAATGTCTTTTACCAGGTCAAACTCCATCTGATAGACCCGACATTGTAACACGAGTTTTTTATTTAAAGAAAACACATTTATTAGACTTAATTTTGAATAAGCATATTTTTGGAGAAGTTATAGCCAATTGCTGGGTAATAGAATATCAAAAAAGAGGTCTTCCACATTTACATTTATTAGTTACGTTGCATCCAAAAAATAAGTGGCATTCGACCGCAGATATAGATAAATTTATTTGCGCTGAAATACCAAGCGAAAAAGAAGATCCTGTTCTTTTTAAAATAATTACAAACTGCATGATGCATGGACCATGCAATGAAAAATCAATGTGTTGGAATAAACTAAAGAAAAAATGTGGTAAAAAATTTCCAAAAACTTTTCGTGAAAATACTGAGCTTAATGAAGATGGTTATCCACTCTACAAAAGGCCTGATAATGGACGTTTTATTTATAGAAAAGGACAAAAATTAACAAATCAATATGTTGTTCCGTATAATCCTTTTTTGAGTAAAACATTTAATGCTCATATAAATATAGAGAGAGTGTCTGATATATCGGTGGTCAAATATCTTTATGACTATATTTATAAAGGATATGATTCTGCGACCGTTGAATGTATTCAAATCGAAGAAGATGGCACAAAAAAAATATTGAAATATGATGAAGTGGGAGCCTATCTTGAGGCGCGTTATTTAAGCCCATGTGAAGCCTGCTGGCGAATTTTAAAATATCCAATGCAAGGAAAATCTCATTCTGTCGACTTATTAGATGTACACCTCGAAAATATGCAAAGAATTTTTTATAAAAAAAATGCTCCTGAAGAACAAATAGAAGAAGCATCAGTAAAAGATACAACATTAACGGCTTATTTTAAGTTTTGCCAACAAAATCCAACATTAAAATTCAAGTACATAGACATGCCAAAATACTGCACTTGGTTAAAAAGGGAAAGAAAATGGAAGTATCCAAGACAAAACAATCAAAAAAAGATTGGACGTATTGTTCCTGTCAATCCAATAGAAACTGAAAAATATTATTTAAGGTTTCTTTTACTTAATGTTTATGGGAAAAATTATAAAGAACTACGCACTGTTAATGGAAAAGAATATGAAACATATGCTCAGGCATGTCTAGCACATGGATTGACCCGAGATGACCAAGAATGGCACAAATGTATGGAAGAAGCATCTTATTTCTCTCGGAAAAATTCAAGAGAATTAAGAATGCTTTTTGTTAATATATTGGTACATTGTGCCCCAAAATACCCGGAACAATTATGGAATAATTATAAAGATCACTTGGTAAATGACATAAAAAGGAGATTCCCTGATTTAAGAATGGAAGAAATTTATGAAAAGGGTTTGGTTTTGATTAATCAATGCTTAGCATATCATGATAAATCATTGTCGGATTTTAAAAATATGCCAAAAATTTGTGGTAACAAAAATAAAATAGATGAAGACGAAATATATGACCCAAAAGAAGAATTAAATCTAGCAGAAAAATTAATAAAAACAATGAATGATGATCAAAAACATATAATTGATTTGGTAATAAGTTTAATTAAAGGTAACAATGAACCTAAATGTATTTTTATTGATGGTCCTGGTGGAACCGGTAAATCTTTTACATTAAAAGCAATATATCACTTAGCAAGAGCACATAATAAAAAAATTTGTAATATGGCGTTTTCCGGTATTGCTGCAACTATTTTAAAAAAGGGCAGAACTTTACATAACCGCTTTAAACTCCCATTAAATATTAAAAAGAATTCTACTTCTGGAATTGAATCTGCTGGAAAAGAAGCAGAAGAAATTAAAGAAACTGACATTTTTATTTGGGACGAAGCTCCTATGGCATCCCGTTTTGTTTTGGATATTATTGATTGTAAATTAAAAGAATTAATGAGAAATGAAAGTCCATTTGGTGGTAAAGTATTCATTTTAAGTGGTGATTTTCGTCAATGTCTTCCCATAAAAGAATTTGCACCTAGAACTGAGATTGTTGATTTACTAATTAAAAATTCCCCTTTGTGGGTTCATTTTAATACACTAAAATTAACAATAAATATGAGAGCTGAAGAAAAGGAAAGGGAATTTGCTAGAAAACTGATTGAAATTGGAAATGGAACTGCAGGTGAAAAAGGATTTATAACTGTACCTGATGAATGCATCTGCAAAGGTGATTTAGTTGATGAAATATATGGAGACCTAATATTGAATGAACTTTTTGAAAAAATGAGTGAACGAGCAATTTTATCGCCATTTAATTCAATAGTAGACGAATATAATGAAAATATAATCAAAAGATTGCCGGGGGAATATCACACTTATTTAAGTATTGATGAAAGTGATCCAAACAGTGATTTTCCTATCTCACATGAAATTTTAAATTCTTTAAAGTGTCCAAGCCTTCCAAATCATAAAATAGAGCTTAAAACTAATTCAATGATAATGTTGTTGAGAAATTTAAATGTTCGAGAAGGGTTGTGTAATGGGACAAGAATGCAAATAAAAGAAATGGGAGACCATGTAATTAGTTGTGTGATTAAAAGTGGGGATAAAACCGGAGAAACGACATTAATTCCAAGGATTACTTTACTTGAAGACAAAAAATTTCCATTTCCTTTGCGGAGGCATCAATTTCCTATTAAACCTGCTTTTGCTTTTACGATAAACAAAAGCCAATCACAAACTTTTTCAAAAATTGGGATTGATTATACCGATGAACCATTTGCCCATGGACAAACTTATGTTGCATTTTCTCGCTGTAAATCATGGAAAGGCTTAAAAATAAAACTTTTGGATGACAATAAAGAAAGGAAAATCAAAAACATTGTGTGGCAAGAGATTTTAAAATAA
>Hetgly06360.t1 gene=Hetgly06360
ATTGTACGACGCTCCAAAAGACGACTCCAATTTGGGCTGCGTTTGTTCGGCAACCCTTCGAATTGTCTCACAAAAGAGCGATATGCGCGATTTCCAGCACAAATTCAATGACGTAACAATGAAATCGAGCAACTGCTGGGGATTCTCCAATTTCATTTCTTTTGCGCAATTGATGGACCCGGGCAAAGAATTGTATGACAAAAGCGGAGACAAAGTGAAATTGGCCATTGATGTCACAGTGAAAGAAGCAAAAACGGAG
>Hetgly06361.t1 gene=Hetgly06361
ATGAATGTCGTGCACGACATCATAGCGTCCTGGGTTGCACTCTATCTGGACGAAAAAATTGAATTCGACGCCAAGTGGAACCACTACAAGCGAATACTTGGGCAGCTGCAGTATGGCAACCGGATCCCGAAGGCCGAAAAGGCCCACTACACACCGGAACAACGAGAGGCCGACCGCTGGTTGTCCAACCACGCGTGGCCGCCCCCAGCGCCCTTCAAGGGCATTCTTTTCCCCGCCAAGATCTGGCACTGGAAAAAGGGGGCCGCTGCGTATGCTGCACACTGGCGAGACGAGTTCTTGGGGCCCAAGGCAATTCCGGACGTCAGGGCAGCTGCCCGGGCCGCTGCCAAGGGCGACTTTCTCAGACTCGGCATCAACGAGTACGTGCGACTGGACGTGCGCGAGCTCACGGAGTTGACCATCGACGATGCGCTGAGAAACAACGAAGACGTGGCGGCCGTGGATTTGGTGAAGCCGCTGACCGCTCCGACCATTAAGAACGTCAACGCGGACACGCGCCATGAGATCATGGGCACGATTGTCAAGAACAGCCTCCGCGCAAAAACCATCATTGGGCTGCTGCAGCGAGAGGTGGTGTCGACCAGGCTTGCACTCGACCGCACCAAAGCCAAGTTCCGACAGCGCAAAAAGCAGCTGAAACGTGAGGTCAACACTGCCATTGACACCATCCGCGCTGCCGAAGACGACCTTGCTGCTCTGAGAACTCGGGCCGCTGCTTTGTACGATCAAGTGCAACAGCTCAAAGAGATCGCTCCTAAGGCTAAGCTGAAGAAGCTCGGTCTCGCGGACATTGGCCCGGAGCTCAGCAGCAGCGAAAGCGAAGGGGACGAGGAGGAAGAGGATGCGGCTCACGACATCGAGCAGCAGCAGCAGGACGATGCCAACGACGTCCCAGACGACCTGACCATGAACGAAAGGGCCGATGCTCGCCGCGCCGCCGTGATGATGTTCTCGACTTTGAGACACCAGCTCACGTTCGGGAACAGCGGCAGTGGGCGCACGCGCCTCCACCTCCGCGGGCCTCTGCCACGCCGCGTCGATCTCCGCGGGCCTCTGCCACGCCGCCTCATTGGTTGTATAGCCCGTGAACAACAACATAAGCAAAAGCAGAAATTTTACAGTTGA
>Hetgly06362.t1 gene=Hetgly06362
ATGTACAACAACAGCAGCATAATCAACGGCGGTTGGGCCGCTGCCAACAGCATTTGGAAGACCGGGCACGAGAATTTGTGCCCGGTCTGCACCGAAGGCCGGCACCGGCCTTCCGAATGCCCGTCCTACAAAGCGACAGGGCCAAATGGCGGTACCCGGGTAGCATGCGTGTGCTGCCTGGGTATCGGCCACAGGCCGGCGGAGTGCTGGATTTTGGAAGCTTGGGTGGAATGGGCCGCTGCCTTCCTACAGCTGGAGGGCCAGTACATGGAGCACTTCAAGCGTGTTGCGGACAGAAAAAGCAAAAGCTGCTTCATCTGCCTGCAGGAAGGACACCCCAAGGGCCGCTGCTCAAACACCAAATTGGTGGCCGAATTTGGAAAGTTCAAGTCGCTTAACCACACAGTGCAGCGCCACTCCGACCCAAAAGGTCGCTGGACCGACATGGTCACCACCAGTGACCAGGGCAGCTGCATATCGCATACCCAGCGCAAATTTGTTCGCCCAAATTTGCGGATGGTCTTTACAGACTTCATGTTGAACAACTGTGACCGGGCCGCTGCTGTGCAGCGACGCTGGGACGATCTGGCAGATGTGGCCCAGCGAGTGCGCTCTGGTGTTCAGAATGTTATTTACACGGAGAAACCGAAGAAGGAGCCACCGGTTGCCGGCTACGACTTCGTGCCGGCAACAAAGGCGCAGGAAATGTACAAGCGCCATGGCCTTGCACAGGCACTGCTTTGCATGTACGTTTTGCCATTTTTTTTCAATTTTTTATGA
>Hetgly06363.t1 gene=Hg341
CTTTTTTTTATTTCTTCCTTTTTGCATTACAGGGTAAAATAATCGCATTGTTCGCTTAAAAAATTTTAATATCTTTTTTAAATATAAATATACAATTTTACATTATTATTTCCTTTATTATTATTGCTTGTTTACATTTTTTTTATTAATTTTAGTTTTTGTTGTTGATAAAATTTTTGATAAATTTTATTTTTTAATTATTTTGATTTTTGAAAGAAAGCCCTGATTTATCTCAATAAATTTTGAAATTAAATTTCGAACTCCTGAATTTATTGGCATTTGCTAAACATTTTTTGATTGTATTTTTTTTTTTGTCTATTAATTAAATTTTCTATTTCTGTTTTAATTCTCTTTTTATTTATAACAAATTAATTTTTAACATTTTTATATTTAATTATTTTCATTTTTATTCTACTAATTTTGGGATTTTGTGTGACACGTTTATAAGCCTTTTTAATAATAATATAATTATAGTACAGTATCTAATTTTTATTAATTTACAAAAAACCTATATTTATTAAAAATACACAGTAACACAAAATTCAGAGTGAATTACTGCTTCAAAAATTTAAAATATTGGGCATTAATGGTAAACAATTTATTTACTCTTTGAATTTTACATCTAAACAATATAAATAAATAAAATTATCTACTAAAAATAATTATTAACACGAAAAACTTAAATATTTCAATTTTTTGGGGTCATTTTTTTTTCATTTTTATTGCATTTTTGTTAAGGATTTTTTCAAAAACTATCAGCATCTTATTAATAAAGGTGATTATCAGAGCATTTTCCTAATTTCGCTGCATTTTAACTTTTTTTGCTGAGCAAAAATTGAAAATTTTAATCAATTTGTTAACGGGTTTAGAATTAAATAAACCAAATACAAAAATATGTACTATATTTCAATTTTCTATATATTTTCAAATTTTAACAATTTATAAAACTTTCTTATAAAAATCAAAAAATTCTTTTAGAAACTGTACCCCTAAAAATCGTTTTTTTCTCCAAAAAGAGACCAAATCGTTCTTTAAATTCTAAAACGTTATTCTAATTTTTGCTCATTCCTTTGTCAATTGCAATTAATTTTGTCATTTAATTTAAATTAAAAAAATCATTATTTTCATATTATTTTTATATTAGAATTAAGGTTCTCGATCAGCTTCGATGCATGTTTACTATTAAAAAAAATTATAAAATTATTTTCAGAAATTATTTTTATTTTATTTTAAACTAGAGTAGAGCGGGACCGGGAATTTTGGGCTTAACCGGGACCGGGACCTTTTCGGGTTGAAAAACCGGGAATTTTTGGCTGGGAAAACCGGGAAAAAACCCGGGACTGGTCCCGGTCCCGGTCAAAACCGGGACCTCGGTACTCAGTTGTCCGTGTTTTGGTCCCGGTCCCGCTCTACTCTATTTTAAACTAATTAATTTATCTTTTTTTAAATTGTAATGTTTTTTAAGTAGCTAAAGAAGTAAAATTCTAATAATTTTTTATATATAATATTGCAGATTTATTATAATATGCCCTCACTTTTTATTATTAAATTTTAAATTACTGATATAGAAGTTTATTTTTATTATTTGTTCGTTTTCAATTTCTTCTTTCATTTTTGCATTAATATTTTCGCTTATGTGCACTTTTATTTTAAATTGTTCAAAATTCTTTTTAAATAATTTGTTATTTTATAATTAAATTATAATGTTGTTGATTTTAAAGATATATTTATTTTTTTCATGGTGTAAATATCCCTAACATTTCACTCCATGGACGTCCCCAATTACAATTGCATATTTTCATTAATTTTTTTTTTTGTATTTGAGATTGAACTTGTAAAGATATTTTTTATTTTTATACATAAATAAATAGGGTTTTTTATATCAATCTAAATTGTAACTAAGCTTTAAAAAAAAGTACGGCGATGCTGGACCAATACCTGAAATTATATTAAAAATATAATTTATTATATGTGAAATTTCTTATAACATTTTTTAAATTTTTAATATATTTATAATCTTTTATTTGTTTTTTTATAATAACCATTTAAGACTAATTAACTGGGGTGTAGTCGTTCATTTCCTCCTCCTTGTCCCCCTAATTAGTCCCTGAATTATCTCACCCGAAAAAACTGAAAATTTTTATATTTCTATTTTCTTTCAAATTTCAATTTTTCTTGTAAAGAAATCTCTAGGCATTCTTTGATTTTAGTAAAAAAAAACTCTAAGAAATTTAAAGCCAAAATTATCAGTTTTTTTTAATTTTTTTTTTGGGATGGTGGGACAAGCTGCTCCCGAAATGCAATAAAAACGAAAAATATACAAAATATACACCTTAGAACAAAAAATAAGAAGAATTTTTTCTTTTAAAATTTTGTGTATCTCATTAATTATGATTTGGCTTAATTTGTTGCTTTTTAAATAAAATATTATTATTTTACACCCATAAATTTCTACATATTTTTGGGGTTTTTTGGCATTTCTAGAACCTAAAATTTCGTACTTACTAATAATTATTCTATTTTTTTTATCCAGCCATATATTTTTTCGGACAATTAAAATTAATTTTTGCCTTTTGCTTGCAAATAGAGCTGGTAGGGACCGGAACTGGTACTGAAAAACGGGTACAACTGAGTACCCAGTCCTGGTTTTGACCAATTTTGACCGGGACCGAAAATAGCCAATTAATTGTATAATTGCTCGTTAATTTTGTATCTTTTGCTTTCGCCAAGGTTTAAGCCACGAAGATATAGATAAATAAATGATAATTAATAACGAGAGAGTCACATTTTTGAAGTAATCTGTATTTAAGCATCATTTAATTAATTTTAACATATTAATAATTTAAAATTTTTATTAATACAAACTTAATGATGAAAAATCAAAAGGGAGAAATGTACGAACCAAAAAACACAAATATAAAAAATGAAACGAAATTAGATAATTATTTAACTAAAAATAAAATTCTTTGGAAATTTATTCCGGCTTTATCCCCCTGGGAAAATGGATGTGCAGAAAGGCTGGTTAAAATTTGTAAAGATGCCTTTAAGTCTGCATTGGGACGAATTATTTTAAATAAAGAAGAACTGTGTACTTTTACGGCAGAAGTCGAAACGATTCTAAATTCGAGACCAATAACACATGTGTCAATTGAACCTGACGGAGAAAGAGCTCTTCGACCAATTGACTTTATTAATCCCGGAGCGGAATTGGGTATATTTTTGTCAAAAAAACGGGGATGAGAATGACCAAGATTATAGAACTGGTCAGGCATCATTAGAAGAGAGACTAAAAGAAAGGTGGAAACGTACAATTAGAGCGTTAGACATATTTTGGGACAGGTGGAATAAAGAATATTTAATTATGTTGAGAAATAGGAACCAATGGATTTACAAGGGCCCAAAATCACAAGATCATCGGGAACCAAAATTGGGCGAAGTGGTGATGGTTGAATATGATTTATATCCAAGGAATACTTGGCCGATGGGACGAATAGTTAAACTGAATGGAATACCAGGGGTGATTAGAAGTGTGAGTGTAAAAATGATTTCTAGACGAGTGGTGGAAAGGCCCATTAGCAAACTTTATCCTTTAGAAGCATCTCAAAAAGAATTAAATTGTTTAAACGAGGAAGATAAAGCAAGATTAATTAGGGATGATTCAAAAAAGGAATTTCCGCTGATAAGGGAACAAATAAATTCAAAAGAGAATAAGCATAAAATGATAACAAGATCAAAAACGAAAGCAATAAAATTGGGTCTGCTTTCTGTAATTTTATTGTTATTAATTGTAAAGGGCGAAAGTGAAAGAGTGAACAAAAAGATTTTAAGGTGTGAAGATTGTAAATTAAAATGTGAAAATATGGGTATTTATATGAAAACACCAATTCGTATTGAAAAAATTCAAATTTGTTGTTTGGGAAGTTGTTTTACCCATCTATATACAAAAGAGTTACAATATAATTTACCGAAAGAACAATTATTAATTGATCATGAATGTATAGTACCTATTGGTCAAAAAGAAAAAGAAAATATAAAAATAAAATTTTCTGTCCACCAATAGATGAGTGCAAAATAATCGATTGGTTAAGTTGGGATTTATTTTTTAACCTGGAGTGCTGGACTGGAAATACTATATGGTATAATTATTATAATCGTATTATACCTTATTACCTGCATTTTTTCTATTTTTAAATTCTTGATCGAATTTCTTAAATTACTTTCTACCTTTATTTCTTTTCCATTTAAGGTTATCAAAAATTGTATTAAAAAGGACACACCTAAATGTGATGAATTAGAAATGGGATTACTTGATAATGGAAAGAAAAATGACAAAGAATGGATAAAGAGAAAAAGAAATAGACGTTTAAAGAACTTGAGTTTGAGAAACACAATTAATTTAACAATTTTCACATTTATAATTATGTCAATTATTGACCAAGTTAAAGGCGGTGCAGAAGTTGCAATTATCCACGACTTCAGAAGATTGTACCAGAAAAATAAATGAAACTGTGTGCAGAATAAGGGGTACAGCAGAGATGACAATTCTACCTGCCGGGCAAAAAATTTCTTTGGCATTAAAAAACGAAAAAAGTGAGACAATCGGATCATTAAAAATTAAATTAAAATCATTAACTTTGCATTGCGCACAAGAAATAATTTCTTGGTCTAGAGATTACGGTATACGAGTTAAATCTGAAAGAAGGTGTCCGACAATGGGATCATGTAAAAAGGGAAAATGTTTAAATATAAGACCTAGTGAAAACATTGATGAATTAAAAAACTACTGGGATTACCCAGGAAATTCTTACTGTATGGAAGGAGAGACAGTATGGGGTCAAATGTGCCTTACCTTCATTTGGTATTAATGAATGCTTTTTCTATAAAATAATAGCGGTTCCCATTACTGGAAAAGTGTGGAGACAAGTGAGATGTCTAAATTGGGATTATGAAATAAAAATCGGGATTGAATTAAAATTTGGGAAAAATTCGGTAAAAAATGAATTAAATCTGTACCCGGGAGTCACAGAAGATTGGCGCGAATTTTCCTTTACGCCCTTAGACGGGAGGGATGCGGAGCATCAAAGATCAAAATGGAATGATAAAATTTGATGAATCAGTCCATATTATCCAAAACGAGAAGGAACAAAGGAGAGTATTTAAATGGACCGAAATTCGGGAAAGGCACCATTGTTCCAATATTTTAAAAAATTCAAAAATGTCCTCCAAAACTAAAACAACAAAAGATTTGATCGACTTTGCTGCAGAGCAGCTCGAGTGTAATAAACGGGACCTCGGAACCGTATTATTGAGTATCACGGAGCGACGAAGTCTGAAGAAACGGATCACCGAGGCATTGAATCGCGGGTCTTCCCTTTGGTATCGATTGGATGAAGGATACATCGAAAATTTAAACGGCTTGAATTTGATGGTGACTCCGGACTGTCGCGGCACAATAAAGGGAAGCATTTTTCTTTTGGTCTTGTACCTGTGGGGGTCGATGCTAATGAGTAACGGAGGATGGGCCATGGGGCCAGAAAAAGAAAGGCCGGTTTGTGAAAGTGACGAGAATAGTGAGTTCGACTTCTCCGAAGAAATGCAGCAGTGGCAAAGAGAGTTGGTGGGCAATGTGGTGGACAATGTGAGGGCCAACAATACTCAAAACAGTGAAAGGGCATGCCAATTAGAGTTGGAAGCAGGTCCATCAACTTCGACGGCACATTCCACACCGGCGGAAAAGGGCTTTGGAGGTACAGTAATTGGTGTAGAAACTGTGGCACCAAAGGAGAATGGATCAGCAAAGGCAGTAAAAAGGTCACACACTGATTTGCCGCCAAAGGCAAAGGCACAAACGGGTTTGCCTCAAAATGGGTTTCAATTTGATGCCCTTAAATGGGCCCAGATATTGCGTACTGCGGTGGTGGTGCCCTTTAACCAGCAGAGTTGTTCGAGCAGTTCAGTTAATGGTGTACAATTGATGCCAACCAATGGAGAAATGATCGTAACTCCATGCCAACAGCAGCAGCCGCAACATCAAAGCCAACCACAACACCAAAATCATCAGCAACAGCAGCACCAAAACCAACAGCAACAGCCGCAACACCAAATTCAACAGCAACACCACCAAATGCATCAGAATCAACGCCAAAGGGCAATTGAAGGGGAAAGCCGATTCACACCGCGGCGTTTTGGCCCGAATCGCTCTCATCCTTATGGAGGCCGAACAACTGCTTCCCATCCGTTCATTAGGGAACAACAGGAAACACAACTCCCTATCAATTGGCCATGGAATCCCCTTCCCCGAATTCAAATTCCAGTCGAAGTTCGTCGTGTCCTCTTGCACCGATTAGCACAGGAGCGGGATCATGTCTTTGGTCTTGCTGGAGTCATGCGCCAATGGAATCCACCAATGGCCCTTTTGTTGCTGTCAATGGAAGCTTTCTACAGTACTCTTTTGGCATTTGTAGTGAATGAAGGCGAGCCGGGGCCATCACTTCCCCAACTTTAA
>Hetgly06364.t1 gene=Hg342
TTTTTTTTTAATTTATATATTTTTATATGGGCCGAGTAATCGAGTTTATTTAACATATTTATTTTTGTTATTTGGTATGAAATAGTCATTTTAAAATTAATTTATTAATGTACTCAAATGCTTATATTTTGAAAATGGCTAATCTATTCAATATATCTAATTTTTCATGTTATATTTTTAATTTATTTAAATAGAGCAGCTGAAGGAGAAGGCAATTCGTGCGGTCATTGAGAAATTGCCGGAGGCAATCGATGAACGGGCACTGGTGGACCAAATTGCCGAAGAATGCGGTGTCAAGGACAAACTGTCGCCAGACATTTATCGCCACCCAAGGACGCGGTTTTTGGACAAATTTTCGCGAGACAAATTTATCTATAATTTCCGTAATGCTCTGAAAAAATTGACTAATTTGCCCCAACACATCAAAGTCCGCAGGGACATGAACCAAAACGAACTCAAAATTTTATATTCCCTTCGGCAACAAGCCTATCAGGCCAATATTGCTGCTGGTGAATATAAATATTTTATGGTTGATTTGGAAATCAGGTCCCTGAAAAACCCCCACCCGCTCAGAACTCGC
>Hetgly06365.t1 gene=Hg343
TTTTTTTTCAAATTTCTTTTTTCTCTTTTATTGTCAGAAATGCTTTTAGATTAATGGAAACGCTTAAAAATTTCACTCTTGACGATTTATTCAAAGTTTTGGCTCTCCAAGACAAAGAATTGGAAGAATGGCTCAAAGAACTTAAGCTTCTACACTCCACCCGTTTTTGCGACTGTGGCAATGAAATGAGCTACAAATGGAAGCAAGATCGACAACAACCGCTTTGGATATGCTATTCGAAAAAGAATCACGACGGCAAACAGCCAACTATTGGCTTTTACACTGGCACTTTTTTTGAAGGAGCCCATTTGTCGCCTAAACAAGTGTTTCAATTTTCCTACTATTGGGCACGAAAATTTTCAAATGATGAAATCATGTTTCAAATGAAATTAGGAAGCCATGCCGTTTGTGATTGGAAAAACTACATGCGCGACGTGACATCTGAATTTTTCAGCAAAAATCCAATAAAAATCGGCGCAGCAGGTGCGACGGTGGAAATTGATGAGACTGTCTT
>Hetgly06366.t1 gene=Hetgly06366
ATGAAGCGGCTGTTGGGCAAGAAAAAGTTGATCACGCCTGCATCAATCATGAATATGTTGGAGAAGTACCGGGATGGCCAAGGTCTACAACAACAACTGAAGACCATTCGACAAACCATTCAAGGCCGAGTTCCTGATGGTTACGTCGCAGTCACACCAACATATGGCAATTTGACTGAAAAAGCAAAATGCGCGGCATTCCGCGAGATGTCGCTTCAAGAGCTGCTTTTGACGCTTTGCTCAGAAATAAGCGAGCGAAAGGGCACCAAAGGGTCAAGAGCAAGCTCTGCGGCGTCAAGTTGCCGTTCGCTGTCACCAGTCAGTAGCTTGGCCGCAACAACGCCTCAAAAAACAGCAGCAAAAACGCCACAGATAACACCAACAACAAAAGGCACACAAGCCAAAAAACATCTGGCAATTGACTCAAAACCAGGACCATCCAACCGGTCTTCTGGCGAAAGCGTTGCTGTCGTTCCACCACCAGTTCCAAAAGTCCAGCAGAAAAAGTCAACTCCGCAAAATGACCAGCACGCTGAAACAACAACATCAGCAACAACAGCAAGCAAAGCGTTTTTGAGACTTGCCGAACCAAATGGCAACTGCTTCTTCAATGCCATTTGCTTGACATTGTTCGGATCAGAAAACCACGCAGACCAACTTCGCAAGCGAATGGAAACATTTCTGACTCGCATTGACCGCATGTTGCTTCATGGGACTGATGAAGGAATAACAACATTGGAGGAGTATGCTGGACGGAGGGAGAAAAACCGGGACTGGGCTCAGGTGAACGACAGCATGCTGTTGGCAATGTTGTTTCAACGACCCGTCGTTATCATTACACCAAATCTCTCGCGACGAGAAATTGAACGACAAAATCCACAGTGGAACTATGCTAACCAAAATTTATATGTCTACTTCCCAGACGGCGAAATGCGGCAATCTCTGCGCAATGTTCCTGTGGATCAGCTCCAAAACTTTACCATGGTCCAAGACGTTGGAACCCATGTGGACAGACGGCCTGTCAACAATGCAATTGTGCTCTACTACAATGGCCTCAACCACTTTGACACCGTCACTTTTGCGCCACGTAGTTCTGTGGAAAGAGCCGGAAACGAAGTCGTCTATGACGACAACTACGTACCTGCAGCATTGACACCAGCTGCCGCAATGGGTTCTCCAGCTCAACCACAGCCAACAACAACGGCACAACCCTCTCGTGAAGTTTTGGACAGCGGACCACTTAAAATGGCTAAACAACAGCCAGCAAGCCAACAACCAGCAGCAGCTCCTTCTGTCGAGGTCAATCGCAGAGGCAACAAGCTCGAAATTCATTCTGAAAGCCCGCGGAAAAACCCTGTTGCTAGCAGCAAAGTATGCTGTGGCCATGAACACGGAGACGCTGAAGGGATGTCCATTGGCAGTGACGATAAGGCTCCCGGTCCGCACCCCAACTTTAATGTTGTACACATGGAGATCGTGAGCAGCAAAAAAGAAGGGCAGTGGCGAGACAACAACGAGACGTGCGGTGTCTGCACGGACCACTGCTTCGCGGAGATCTCGTCACTCAGCTGCCCTGTGACACCAATGTCAAGCATATCTTCCAACCATCTGCCTACGCCGTTCGTTGACCACCAACCGGACATGCCCGAAGTGCCGCCGTCCCGTCAACATCCCAGACAACATATGGCCGACCAAAGACTCGCATAG
>Hetgly06367.t1 gene=Hetgly06367
ATGAGCAGCCTCACCGTACGAGCGCCAGCAACCACCGTGCAGCGCTTCGACAGGGCGTACGCCCCCACGCCGCCGACCGCGTCCCCCCCCCGCGACGACGACGAGCGCCGCCGCCCGCGTCCTCCCCCCCCCGCGACGACGGCGACGACGACGAGCGCCGCCGCCCGCGTCCTCCCCCCAAAAAAGGCTCAATGCGTACGCCTCGGACGCGTACGTACGCCCAAGCGTACGCCCCCACCAACGTCGACGACAACCGCCCGCGTCCCCCCTCCCACACAGACGACGACGACGACGACCGCGTCTCCCCACCCCCGGCGCACGCCCCCCAAAAAGGGTACTGTAGGCTACCAGAAAAAAAGATAG
>Hetgly06368.t1 gene=Hetgly06368
ATGAATGAGCTTTCGTCCAATCTGTTGAATGGGTGCCCCGTCCCCGCCATTGCTTCATCAATTTGCCAATTGCTGTCGATGGAAGTGCCAAAAAGCGGAAAAAAATCTCTTCGACGTGCCAACCCCGATGCGGCCCAATCAATTGACGGTAACATTGGGAACAAGCGCCATCGAAATCAGCAGAATTCGCGCAACGAGGGCAATCAGCAGCAGAAACCGCAACCGACCGAGTTCCAACCAGTCGTTATGGCCGTACATCACCCGCACAGTCTGACCGGCGTGGTCGCCCAATGCAGCCCAATGGGGGGCGACAAGGCCAAGTTCAAGGGCCGAAAGCTGATTCTGCAATTCGAAAGGATGCATCGCAGCTTCTCACAGTCAAGGAGTGGGAGAGGGACGACGGCCGGCCAGCGAAGACTGAATGTCGTGCAGCAGAAGGGTGCCATTGCAACAGCAAACGAAAACACTTTCATCTTCACTCTCACTTTCGGCCAGTTTTCCACCATGACCATCATTTCGCATTCGGGGAACGGTATGAGTGGGCCGCAAACGCAACCGTACCTCACAACTTTTTTGGCGTTATGGAACCTGGAGTGCCAATGTCGAGCAGCAACAGCATCAACAGGGAACATCGGCGGCGCTGCATGCGCAAGTTGGCCAAAATGA
>Hetgly06369.t1 gene=Hetgly06369
GTAGGAATTGGCGTCAATTCGGCCACTCGGCAGATCATTTTCACAAAGAATGGACAACGTTTGGGTTTCTCCGATTTTTTCGTTGTTCCATCTTTTGTTGGCCAATTGTTCCCATTCGTTTTTTTGCGCAACTCTGATGACAAAATTGAGGCGAACTTTGGACCCAATGTCAAGTTCGATTTGGCAACTCTCTGATGATAAAGAAATATTCACTAAAACTGATCAATTTGTTCTTTTTAATCCTTTTTATTTCCGTCTTCGCAAAACGCAAAACTAAATTAATCTGTT
>Hetgly06371.t1 gene=Hetgly06371
ATGATGCCCTCCTCGTGCTCTTCCGCGGTCATCGGCACCACCCATTCCCCATCATCATCTTTCCATGCTGCTGGGACCAATGCCGGTGCTGCTGATGGAGTTGGTGGCACTCTCCGGCGCCACCAATCGCCGCCCCTTCTCGCCCATCCGCCGCCCGCTCTTCCACCGCCGCTCCTCGATCACCAACGGGCCCAACAAAACTGTTCCTCCGCTTCTGCTGCCTCCTCTTCCTCCTCCTCCCTGAATCCGCATCATCATCATCATGTTGGCGGTGTTCATCCGTCCTTCTCTTCCATCATCACCACCAACATTTCCGGCCCACAAATCCAAACCCAACAGAAACAGTGCCAAAATGTGTCGCCGCCCCAGGCATTGCTCGAGGCCGAACTTCCATTTAGCGACTCGCAATTTGACGGCACCATTTACTAA
>Hetgly06375.t1 gene=Hetgly06375
ATGTGCAAATTCTCTGCTGGCATTATAATCGCCTTTAGAAAATGCCTTATTTTTGAGCCAACAACTTATTTTTCGCCAGTGATTTGCTTACTTTGTAATATTTTCACTCAGTGTTGGTACGGATTTTCAAAAAACGTGAAAACATGGACGAAAACCCTTGCTTGCCCTCCGCTGAGTTCGCCAGCCGTCGATTTGACCGTGCACATTGGTAACAGAAAGCGTGGAAATGAAGAAGAAGCAGCAGCCGTCGTCACTTTGAACGAATTGGGCATCGACATGGAGCAGTTCATGGACTTTTTGGAGGCAATTTCGACCAATGCTCTTCTATTTCCAATTTTGCCAAATCCGAAAAATGTCCTTTCGTTGCTCATATTGGCCGACTACTTCCAAGTGGACTGGGTGAAGACGCGCTGTTCTAATCACCTGATCAATTGA
>Hetgly06376.t1 gene=Hetgly06376
ATGGACATTGTCATATCCGCGCGCCTTTCACCAAAATGGACCGTACTATCTACCGTATTCGAGCTGACGTATGAATCAGGCAAGGAAAATTGCAACGTCAAACTCATAAATTCGAACAAATGCGTAAATACCGATAATTTGTTTGCCGAGAAAAGGAACCCCGGCACCGGCGGTTTGAAATGTTATGACGAGATCAAGCACCAATCTTATGACTGCTCCTGTCACGGTGATAAGAAATGCCTTGCTGAAGAAAAATGGGCGCACGACGCCTTTCTTTGTCCAATAATAAAGGTCAATTCACTTCAAATCAAAGGAAGCCGACAACGAGTGTTTACTAACCCAAAAGATTTTCGATACAATTGGACTCGGATTGAGGTTGATTGTTATAAGGCCGATGCGGGCACCGTAAGCTTTTGGGGCTACAGTAACCCGGAGACAAAGGAAATCATTCGGGTGGACGAAGTACACTGTTTGACTTATGAAACTGCTGGAGTGCCAAAACGGTTCAAAAGTTTGCAAGTCGAAGAACAGCCGCCGATGAAAAAACTGAGTCCAAGTCCATTCTTGGCCAATAATGCTTCATCACTTATCCATGTGTTCGTGCCATTTGTTGGCCATCCATGA
>Hetgly06377.t1 gene=Hetgly06377
ATGATTTTGAGCTCCGATGCGAGACTGGCACCCTGCTCACAATACCGCAAACAACTCATTTTTGTGCGCGGTTCGCTTTACGAAATTGATCAAATCGATGCTCAAGTAAAGCAGGTAAATGCCAATCGCATTGAAGTGAATGTGTCTGACTTTATTGGCCAATTTTACGACGCCAGTTTGGCAAGAGAAAGCGAACTCACATTCCAAATCAAAAGTGAGGACTCTATAGTCACAAAGACTCTGTCTGAACAATGGGAGCAGGTGAACTTTTTGATCCGGTTTGGATTAATGATTAGAGACGAATACGTTGGCAGAGGAACAACGCGACGCATGACTTTTGGTGGAAACAAAACGCAGAAAATTGTGAAATCTCCAGCACGCCTCAACATGATGGATCTTAAAGCATCTGTAGAATTTGGTAACGAAATTGAGCTCACTCCCGTTAAGCTCATTGAACCCGCCCAAACCCAGGCATACAAAATCGCAGGAAAACGAAAGAGACCGGTAAAAATGGCTCGCTTCAGTTTTCGGGCGCCAAAAGTACTCATTGGGTTTTTAGTAGTTTTTCTTCCCAATGCTTTTGCAAATCCCGATGTGAATAACCAAATTTCAATTCAATTCACTTCTCCATCAATGATTTATCTGCTTATCATTCCATTTCTGATTTTTGAAATCCACGCCCGAGGGCCGGAAACAAGACCAGAAATTGAAGCCGATGAGGAGAAAAATGTCAATGAAAAAACGGATACGGAACCAAGAAAGTATGACCTTAGGAAGAGGACGAGAACTTGGAA
>Hetgly06378.t1 gene=Hetgly06378
TTTGTTGATTCTCCGAAAAATCTGTCAAATTTCTTTATAAATTTGGATTGGCGTAATGTTTAAGCAAATATTTTTTAATTTTGGCATTATATTTTTTTGCTGTTAATTTTGGCTAATTATTTTGTTATTTATTGCTTTATTGTTTTTCTCTTTTGTTTTTAATTTAGCACCTGCACTAGTACTAACAAATGGCACCGCCTAAGCGCAAAAATGCTTTTAAAAGTGAATATGCCAATGAATTTCAGGGGATCACAAAAAGCAATGCAGGAGATGAATTTGCGCATTGCATCCCATGCAATTTTGACATTTCTTTGTTGTCCACTGGAAAAACGGGCATTCCTCATCATCTGAAGACGGAAAAACACAAGAAAGCAGCGAAAGCTGCAAATTCCGCAAAGGCAATTACGGCATTCATGCCAAGCAAATCGGCACCAACGAATTTGGACCGTCAAACAGCAGCAGCGGAAGGTGCTTGGGCAT
>Hetgly06379.t1 gene=Hetgly06379
ATGAACACTCACGGGCCCACGCGCTGGACCACACTGCTCTTGGTGGTGAACAAAATTTTGCATCTTTGGGACATTTTTGCCGACTATTTCACAAGCGATGGGCCTCTACTTTTGCGCAACTTTTTTGCTTCTGATTCAGACAAAACTGTGGTCACTTTTCTCAGTGTGATTTTGCCGATATTCAATCACTCAATCGATGTTTTGCAGGCACAATTAATCCTTTATAAGAATATATAAATATTTTTAAGAAGCGAAATGCAATTTTGCCGGAATTAATTGAAGAAATGACAAATTTTAAACGGAAAATCGAAGAGCGTCTTAATGAGGAGTTTTACGGAATGATCACCGCGCAAATGCTGCGTCGTTTGGACCCTAATGAATCAACTCATTTACGTGCCTCATTCCGGACTTTTCTGAAATCAACACTTACCTATGTCGATAAATGGTTCCGCGTTGAGCGCTTTCCAACGGATTTGGCATGGGTTTCTCTCAAAGAAAAAAAAGTTTCTCGCGCCGAAGTGATGAGTTTGGCTGAACAGATTGCTCCGGAAGTAAACGACAATGAGCTTTTTGACGAAATTACGGCTCTGAATGAAATATTTGAAAGGATTTCTGACGAGAAATTTGGTGAAATGAACGCAAAACAGAAGGTTTTCGAGGCGGAATTACCCAATCTTGTGTTGCTCGTCAGCAAAATTCTTTCAATTCCCGTGTCCAATGCATGCGTGGAGCGTGTCTTCTCTCTTTGTTCAGCTCAGTGGACTGATGTGCGCAATTTATTGAAAGTTGAAACCATGAAAAGTCTGGCCCAAATCAAATCGAATTATGATCTCACTTGCACTAAAATGTACGATTTGCTCATTTCCTCACCAAAATTGTTAAAAATGATCATGGGAGGTGAAAAATATAATATTTAA
>Hetgly06380.t1 gene=Hg350
ATGTCTCATGAAAACAATGGAAATAAAATTCTCGAATTCGTTTCTGGTGGTAGTAAGCAATACTCAATAAAATTTGAAAATGAAATTGACGGAAAAATTTGGTATAAAACTAAAATGAGAGGGATAACCTTTAACAAAAAAAATAACTTCGACCACGAGGACTTTAAAGGAATGATTTTAAATTATAAAGACGAAAAGAGAAAATATTTCAATTATGATAAATTTGGACCATCGCGAGACAGTAAAATATTATCCCAAAAAATGACGAAAGAATACAAACCCGTTCAAAAAAAAGGAATAATCGACGAAAATTTTGATATTATTCCCTATGGATTTTGGTGA
>Hetgly06381.t1 gene=Hg351
ATGAAGAAATATTTCGATTCAATTCCAGATAAGGGACCAATCGACCCCCGGGATGCTTTTGCGGGTGGGCGAACGCAAGCATTTTGTTTATATTCAAAGATTTCTGAAAACAGTGAAATAAATATAGCCGACATAGTCTCATTATATCCATCGGTTAATTATTTCACACCGTACCCGGTTAAGACACCAAAAATAATAATACCAAAATCTCAAGACGTTCTGTGGCAATGTCCCGAAGACATCCCTTATGATGGACTGCTAAAAGTTAGGGCAATTCCTCCAAAAAAATTGGCAATACCGCTATTACCGTACCATTATGATTCCATTTTATTCTTCACAAATTGTTCCAAATGTTGCCAACGGGCGAAATCTAACTTTGTCTTTATGAAAAATGTCAAAAAATGTAATCATTCTGATTCTGAAAGAGGGCTTCATGGGGTTTTTACAAGCATTGAATTAAAATTAGCTATGGAATTGGGATATAAAATCGATAAATTCTATAGGGCATATCATTTCGAAGAATTTGATTCTGATCTATTTAAAGGATATGTTCGGAAATTTCTTAAGCTCAAAGTTGACTCATCGGGATGGCCCCCTAATCTTACTAATGATGAAGAAAAACAACATTTTATTTCCGAATATAAACGAATTTTTAACATAAAATTAGACCAGAACAACATTAAACCGAACGCCGGTATGAGATACATTGCAAAACTCTTACTTAATTCACTTTGGGGCAAATTTGGGTTTGTTTAA
>Hetgly06382.t1 gene=Hg352
ATGTTTAATTTTCAACCCCAAAAATACGGACAGCTGTTTTTCCCGGACCAAACACAATATAATGGTCATATTCCATATAACCCGACAGTCTTGGCGGAATTTGCGACATGGCGCCGCGAGATTCTTGGAGTTGTCAGTCCACCGGTGGATCCCGAAATAAAGCAAGAGCCCGAGGATGAAGAAGAAGTTGTGCCGGATGTACCAATAGACGATTTTCTTGGACCAGTGCATCAAAACGCTTTAGGCCTGGAATTTGGACCGTTGCCTCAACATGCTTTTGGCCCACCCCAGCAATTTTTTGGCCCGATGAATCAGCATGCTTTGGGCCCACCACCGCAATTGTTTGGCCCAGCCCCGCATTTTCGTCTTCAGCAACAAGCGCATGGAGTATGGCAACCCTATGGACAATTACCTCCACCGCAATTGTACATGCCACCACCTGTGCCACCAATTGCGTACCCACCTCCACCGCTGGTCCCTGGAATTCCATTTCGACCAATTCCTTTACATCAAATTCAAAACCACCCACCTCGTCACCCCGATTTGGCGGATGCTTTTGTGGCTCCAAATGTTTTGGCCCAACAGCCACAACATGGACAAATTCGGCCGCAGCGTTGGGCTCCAATTCGTCCTCTTTGTTGA
>Hetgly06383.t1 gene=Hetgly06383
CGGTATCCTCCCAAGAAGAAGCTGATGACCGACAGATTTTGGAAGCCAATTTACGTGCGGATGAGTGGCAATATGCTGGCGATGTTCACCAACAGAGAGGAGACGAGGCCGGCGCAGGAAATACTCATTCAGGCCAATTATTCGCTGTCGGAACAACGGACGGAAGAAAAGGCGGAGGAAGCGAAGCGCGGAGCAGCGGAGGAATTCGAGGCGGACTTCAGCAAATTGGACGCTGAGAACCCGGCCAAACGGTGGGCGGCCGCGTTTGAGCAGGCCACGCTTATGCCGCCGTCCGACTCGGAAGTGAATTTGGC
>Hetgly06384.t1 gene=Hetgly06384
GAAAGGGCCAAACGCGAGGCCGAGCACGAGGGCGAATTTGTGGCCGAGAATCGAATAGCGCGGCCTAACGACCACCTGTCCGCCTCGCACCTTTCGTCCCCAACGCCGGAAGGGGGCAGTCCCGTGTCATCCGTGGCACGGCCGGTCGGCTTCTACGACGACTTCAAAGGGGCACAGACCGCTGATGACGAAAGTCCGTTGTTCGACGCGGACGATTCTCTTCCACTTCCCGAATTTCCGCTTCCGTTCATCGGCGATGGATGGGAATTGTTCTTACGGTATCCTCCCAAGAAGAAGCTGATGACCGACAGATTTTGGAAGCCAATTTACGTGCGGATGAGTGGCAATATGCTGGCGATGTTCACCAACAGAGAGGAGACGAGGCCGGCGCAGGAAATACTCATTCAGGCAAAGCGGAAATTAAAGAAGCAATTAGTGCTAATTGGTTTACGACCAGCCAATTATTCGCTGTCGGACATTGTGCTGCAACCGTACGACGCTTTCACCAAAATTCACACCGTAAAATTGCAACACAT
>Hetgly06385.t1 gene=Hetgly06385
ATGAACAGTGCCAAGCTTTGTTGTGCCGCATCACTCACTGATCTGAACGCAAATGAATATAAAAATTGGATTGCGGCGGAAAAGCCGGACATGGACATTGTCATATCCGCGCGCCTTTCACCAAAATGGACCGTACCATCTACCGTATTCGAGCTGACGAACCCCGGCACCGGCGGTTTGAAATGTTATGACGAGATCAAGCACCAATCTTATGACTGCTCCTGTCACGGTGATAAGAAATGCCTTGCTGAAGAAAAATGGGCTCACGACGCCTTTCTTTGTCCAATAATAAAGGTCAATTCACTTCAAATCAAAGGAAGCCGACAACGAGTGTTTACTAACCCAAAAGATTTTCGATACAATTGGACTCGGATTGAGGTTGATTGTTATAAGGCCGATGCGGGCACCGTAAGCTTTTGGGGCTACAGTAACCCGGAGACAAAGGAAATCATTCGGGTGGACGAAGTACACTGTTTGACTTATGAAACTGCTGGAGTGCCAAAACGGTTCAAAAGTTTGCAAGTCGAAGAACAGCCGCCGATGAAAAAACTGAGTCCAAGTCCATTCTTGGCCAATAATGCTTCATCACTTATCCATGTGTTCGTGCCATTTGTTGGCCATCCATGA
>Hetgly06386.t1 gene=Hg357
ATGTCTGCCGTTCCGCTGGACACACTTTTTGGAGAGAATCAGGCAGAGAAAGAGAATTCCAAGCCGCGCACTGTCAAAAAAAGCCCGGTCACATTGCCGGAGGTGCAGACCGAACATGCCGTGACCAGGGATGCCGTGAGAGAGATTGTCCGTGAGGCAATCAAAGAGTTGAAAGCTGAGCTACTCCCAAGCATTGGAGACATTGCCAAAAGCGTCGTGAGCATTGCGGATGCACTCGAAGAGATGGAGGCCCGAGGAGTTTTCGAAAATTTGTCCCTCAAGGATGGGCCGGAAAAGAATGAAATGGAGGAGGAAAAGGGGGGTCCTCAACCCCCGGAGGAGAACCCTCACAACAATCCGGCAGCTCATTGTCGCGGCTCACATGCCCGCGGTCGCTTCAATCGCGGAGGCCACCGAGGGAATCATAGAATGCCTCATTGGAATCAAAATTATGATGGGCATCGTCACGGTGGCTATGGCTATGCAAATGCGGAGACCAAAGCGCAAGCCCGCCGCTTCTTCAACATGCGTCGCCGTGGGAGCTGCAGCGGTGGTCCGTCCAATTCATCCGGCAGTTGTCGTTGTGCTGATTGCTCTGGACATCACAGTCGCTTTCGTCCGTATGGTCGCTGATCGGTTGGAATTCACGGAAGGGGGGAGGAAGTGTTGAATCTGTTTTGCCTTGTTTTGATCGGCATTTTTGCTTTTGGCCTTTTCCCCAATTTATTCCCTTTACAATGATCTGCTTTCTCTCTCTCTTCCCTTTGATGTTGAATCCGTTATTCCAAACTAATCCCTTCGTCCATTCCCTCTGGCATTTCCCCCAAAACATTCTCTTTGTCTATTTTGATGTGCCGACTATTCTTCGCTCTAATCCTTTTTGTCTCTTGTGTTTTCCTTCCCCAAAACCCTTTTCCCGATCTGCTCCCGACCCGTATATAAGCAACTCATTGGACACCATTTGGACTTCTTTTCTCTTCTCAATTTTCATTCACATTTTTGACTGAAACGATCATTTAACCAATTTAACTTATTTTTGTCTAAATAAACCTTGTCCAAAAAACCCAATCCCAATTTGCTCTAGTTTTGGTATAAGTGTTGGTCAGACACAACAATATGAATTAAAT
>Hetgly06387.t1 gene=Hetgly06387
ATGATAGAAAAGAGAAGGGATGGTGGTGTTGAAAGTCCCGCTGGCTCAACAATTACAGTTGAGCTGACACATGGAGAACAGTTAAAGAAAATGTTATCGATAGCAGATAAAGAGCCTGTTCATGATGTGACGCCGAACAGTGGAGAAGGTCACACAAGAGGCCAGATTCTCAAAGAGCTGATCGAAAATATTGTAAAGGAGGACAAGTTGAGGCCGCCGCCTCATGGTTCATCCGACTCGGATCGGCAACTTACAAGAGGTGCCGGTCTTCTGAAGAATTTGGCCCGTTTCCTGATGCCGGTTGCGTCAAATTTGCTAAAGACAGTTTCTCGTGAAGGACTTAAGGCCGGAAATCGAGTGCTTGAAGACATTTCTCAGGGCAAAGCGCTCCGAGAGTCAATTCAAGCACATGCAAAACATGGTATGGAGAATTTGGTTGAAAAACTGAGACAATGTGGAATGGGTGCCGCCAAGACTGGTAAAAAATAA
>Hetgly06388.t1 gene=Hetgly06388
ATGCATATAAACAACGGTTTGGGCTCTCACCACAGAAGGCCGCCAGAACAACGGCTTCGCCTCAAGAGAAAGGATGATGAGCTGGAGGAGCTTAAGCGGGCAGCGAAGCGTCGCGATGACGACACCCCTGAGAAAATACGGGAATTCTTCCATCACCATCCGGATGATCATGAAAAAAAGTTGAACGAGTCTCGACTGATCTTCACAAAATATTTGTCCGGTTTAGCGCCGTGCTACAGCGCGGCGACGGCAACAGTGATGACACTTCGCGAAAAGACACAGAAGCAGCTAAAGGACGACGAGCACTCATCGTTCCAGCAGCAAATCGACCGAGCAAAACAACTGCTGGAATACAGACGTAAGAGATTTGCCGCATTGGAATTTGAGGCAAAGAAACGTGATGAACAGCAGCAACAGTCCTCCCCGTTCTCTTCACCAATCTCAGCTGCATTGACCGCCGGAGAGGCGTTAAAGGAGCGAATAGGTGCCGCTCAAGTGAAGGAGACAGAAAAGTCGGATCAGGATAATAATAATTCGATGGAAAAACCAAAAACCCACGCTGAGGTTCTCAAAGAAAAAATACAGCAACAACAACAACAGGAGATAACCACGGCAACTCCAACAGAATTGCAAAATGACGGTGGCAAAGCGGCAACAGACTAA
[truncated: 31,641,282 more chars]
