# Supplementary material for: Single Nematode Transcriptomic Analysis, Using Long-Read Technology, Reveals Two Novel Virulence Gene Candidates in the Soybean Cyst Nematode, Heterodera glycines
Source: Int J Mol Sci. 2023 May 29;24(11):9440. doi: 10.3390/ijms24119440 (PMC10253548; doi:10.3390/ijms24119440)
Supplement: Supplementary file 1 [file ijms-24-09440-s001.zip › Tables_S1_S2_S3_S4.xlsx]

## Sheet: Supp. Table 1
Single nematode transcriptomic analysis, using long-read technology, reveals two novel virulence gene candidates in the soybean cyst nematode, Heterodera glycines
Dave T. Ste-Croix 1,2, Richard R. Bélanger 2,,3 and Benjamin Mimee1
1 Saint-Jean-sur-Richelieu Research and Development Centre, Agriculture and Agri-Food Canada, Saint-Jean-sur-Richelieu, Québec, Canada
2 Département de Phytologie, Université Laval, Québec, Québec, Canada
3 Centre de recherche et d'innovation sur les végétaux (CRIV), Université Laval, Québec, Québec, Canada
Supp. Table 1. Filtering status of individual Heterodera glycines nematode sequenced in each of the three sampled populations
Sample_id	Plant origin of nematode	Kept/Discarded	Reason for removal
QCSTJ5_PI1	PI 88788	Discarded	Low read / mapping rate
QCSTJ5_PI2	PI 88788	Kept
QCSTJ5_PI3	PI 88788	Kept
QCSTJ5_Ess1	Essex	Kept
QCSTJ5_Ess2	Essex	Kept
QCSTJ5_Ess3	Essex	Kept
QCSTJ5_Ess4	Essex	Kept
QCSTJ5_Ess5	Essex	Discarded	Low read / mapping rate
QCSTJ5_Ess6	Essex	Kept
QCSTJ15_PI1	PI 88788	Kept
QCSTJ15_PI2	PI 88788	Kept
QCSTJ15_PI3	PI 88788	Kept
QCSTJ15_Ess1	Essex	Kept
QCSTJ15_Ess2	Essex	Discarded	Low read / mapping rate
QCSTJ15_Ess3	Essex	Kept
QCSTJ15_Ess4	Essex	Kept
QCSTJ15_Ess5	Essex	Kept
QCSTJ15_Ess6	Essex	Discarded	Low read / mapping rate
QCSTJ6_PI1	PI 88788	Kept
QCSTJ6_PI2	PI 88788	Kept
QCSTJ6_PI3	PI 88788	Kept
QCSTJ6_Ess1	Essex	Kept
QCSTJ6_Ess2	Essex	Kept
QCSTJ6_Ess3	Essex	Kept
QCSTJ6_Ess4	Essex	Discarded	Expression similarities with PI 88788 virulent individual from same population
QCSTJ6_Ess5	Essex	Kept
QCSTJ6_Ess6	Essex	Discarded	Expression similarities with PI 88788 virulent individual from same population

## Sheet: Supp. Table 2
Single nematode transcriptomic analysis, using long-read technology, reveals two novel virulence gene candidates in the soybean cyst nematode, Heterodera glycines
Dave T. Ste-Croix 1,2, Richard R. Bélanger 2,,3 and Benjamin Mimee1
1 Saint-Jean-sur-Richelieu Research and Development Centre, Agriculture and Agri-Food Canada, Saint-Jean-sur-Richelieu, Québec, Canada
2 Département de Phytologie, Université Laval, Québec, Québec, Canada
3 Centre de recherche et d'innovation sur les végétaux (CRIV), Université Laval, Québec, Québec, Canada
Supp. Table 2. Blast annotation of transcripts located in novel gene features of Heterodera glycines.
query_sequence_id	subject_sequence_id	query_start	query_end	subject_start	subject_end	evalue	annotation
Hg9.1	KAF7626129.1	102	455	21	138	3.18e-24	KAF7626129.1 ATP-dependent DNA helicase [Meloidogyne graminicola]
Hg151.1	CAD2181044.1	3823	2276	151	656	9.3e-133	CAD2181044.1 unnamed protein product, partial [Meloidogyne enterolobii]
Hg192.1	KAI1728970.1	43	462	381	514	6.42e-60	KAI1728970.1 low-density lipoprotein receptor domain class A domain-containing protein [Ditylenchus destructor]
Hg371.1	CAD2188766.1	72	317	20	92	2.31e-14	CAD2188766.1 unnamed protein product [Meloidogyne enterolobii]
Hg408.1	AXY63859.1	825	2822	3	668	0	AXY63859.1 glycoprotein precursor, partial [Sugar beet cyst nematode virus 2]
Hg569.1	KAH7726685.1	128	568	2	148	2.49e-47	KAH7726685.1 Protein K07A1.10 [Aphelenchus avenae]
Hg588.1	KAI1729454.1	8	322	56	158	2.57e-43	KAI1729454.1 selR domain-containing protein [Ditylenchus destructor]
Hg642.1	KAI1727726.1	106	360	20	104	1.37e-23	KAI1727726.1 histone-like transcription factor (CBF/NF-Y) and archaeal histone domain-containing protein [Ditylenchus destructor]
Hg644.1	KAH7728937.1	3	380	150	277	6.04e-35	KAH7728937.1 Protein F55A4.7 [Aphelenchus avenae]
Hg733.1	KAF7631047.1	692	1156	162	313	2.26e-42	KAF7631047.1 hypothetical protein Mgra_00008698 [Meloidogyne graminicola]
Hg734.1	KAF7635588.1	156	383	198	273	2.73e-31	KAF7635588.1 hypothetical protein Mgra_00004976 [Meloidogyne graminicola]
Hg835.1	KAI1727318.1	245	1141	58	326	8.24e-43	KAI1727318.1 CAF1 family ribonuclease domain-containing protein [Ditylenchus destructor]
Hg841.1	KHN76157.1	307	600	388	485	2.22e-27	KHN76157.1 Trehalose-phosphatase [Toxocara canis]
Hg853.1	XP_024508578.1	111	611	118	269	3.83e-21	XP_024508578.1 Zinc transporter SLC39A7 [Strongyloides ratti] CEF69378.1 Zinc transporter SLC39A7 [Strongyloides ratti]
Hg900.1	KAI1707395.1	425	895	138	280	8.21e-56	KAI1707395.1 major facilitator superfamily domain-containing protein [Ditylenchus destructor]
Hg1076.1	KAI1708530.1	25	774	108	294	1.66e-19	KAI1708530.1 hypothetical protein Ddc_14322 [Ditylenchus destructor]
Hg1126.1	QLK97572.1	142	315	28	86	2.92e-25	QLK97572.1 secretory protein 10C02 [Heterodera glycines]
Hg1158.1	KAH7726459.1	449	1573	61	381	8.74e-146	KAH7726459.1 Protein AMT-1 [Aphelenchus avenae]
Hg1159.2	KAI1722122.1	1	543	123	303	1.5e-55	KAI1722122.1 innexin domain-containing protein [Ditylenchus destructor]
Hg1159.4	KAI1722122.1	38	427	237	371	6.19e-21	KAI1722122.1 innexin domain-containing protein [Ditylenchus destructor]
Hg1159.5	KAI1722122.1	38	376	237	369	1.52e-22	KAI1722122.1 innexin domain-containing protein [Ditylenchus destructor]
Hg1331.1	AAW33664.1	136	270	27	71	4.02e-08	AAW33664.1 unknown [Heterodera glycines]
Hg1496.1	CAD2204380.1	1016	609	1756	1919	1.05e-34	CAD2204380.1 unnamed protein product [Meloidogyne enterolobii]
Hg1537.1	TCB31770.1	155	385	4	80	4.32e-15	TCB31770.1 hypothetical protein E0H86_07610 [Acinetobacter sp. ANC 4635]
Hg1618.1	CAD2193103.1	875	483	901	1032	2.02e-46	CAD2193103.1 unnamed protein product [Meloidogyne enterolobii]
Hg1754.1	XP_045624342.1	122	409	61	154	9.15e-11	XP_045624342.1 30S ribosomal protein S16-like [Procambarus clarkii]
Hg1811.1	CAD2186902.1	648	286	55	175	1.55e-23	CAD2186902.1 unnamed protein product [Meloidogyne enterolobii]
Hg2248.1	CAD2168360.1	919	473	97	239	2.7e-59	CAD2168360.1 unnamed protein product [Meloidogyne enterolobii]
Hg2485.1	CAD2198163.1	649	780	239	283	2.25e-08	CAD2198163.1 unnamed protein product [Meloidogyne enterolobii]
Hg2512.2	KAI1727575.1	94	438	25	155	1.72e-21	KAI1727575.1 transthyretin-like family domain-containing protein [Ditylenchus destructor]
Hg2519.1	KAI1719959.1	3	194	382	447	5.87e-18	KAI1719959.1 nucleotide-diphospho-sugar transferase domain-containing protein [Ditylenchus destructor]
Hg2762.1	KAI1711922.1	37	297	892	977	1.33e-29	KAI1711922.1 GYF domain-containing protein [Ditylenchus destructor]
Hg2822.1	KAF7636348.1	433	771	705	817	8.52e-50	KAF7636348.1 NRF domain-containing protein [Meloidogyne graminicola]
Hg2877.1	KAI1717078.1	1	234	143	220	1.79e-41	KAI1717078.1 phosphatidylinositol-4-phosphate 5-Kinase domain-containing protein [Ditylenchus destructor]
Hg2929.1	KAF7627287.1	21	785	70	322	9.08e-136	KAF7627287.1 malate dehydrogenase [Meloidogyne graminicola]
Hg2935.1	KAH7724111.1	50	517	518	648	2.39e-15	KAH7724111.1 Skp1 related (ubiquitin ligase complex component) protein 18-like protein [Aphelenchus avenae]
Hg2969.1	CAD2144329.1	2369	2866	157	305	2.54e-41	CAD2144329.1 unnamed protein product [Meloidogyne enterolobii]
Hg3062.1	CAD2174609.1	619	1110	750	882	5.75e-64	CAD2174609.1 unnamed protein product [Meloidogyne enterolobii]
Hg3084.2	CAD2156269.1	160	492	217	332	1.33e-35	CAD2156269.1 unnamed protein product [Meloidogyne enterolobii]
Hg3175.1	CAD2182421.1	6	239	282	359	1.09e-21	CAD2182421.1 unnamed protein product [Meloidogyne enterolobii]
Hg3176.1	CAD2182420.1	23	670	1	220	1.07e-61	CAD2182420.1 unnamed protein product [Meloidogyne enterolobii]
Hg3184.1	CAD2190792.1	3	890	1083	1388	4.89e-64	CAD2190792.1 unnamed protein product [Meloidogyne enterolobii]
Hg3238.1	KAF7637286.1	20	199	1	60	5.14e-18	KAF7637286.1 hypothetical protein Mgra_00003252 [Meloidogyne graminicola] CAD2143756.1 unnamed protein product [Meloidogyne enterolobii] CAD2180138.1 unnamed protein product [Meloidogyne enterolobii]
Hg3280.1	CAD5213668.1	4271	4465	1271	1320	4.93e-18	CAD5213668.1 unnamed protein product [Bursaphelenchus xylophilus] CAG9093041.1 unnamed protein product [Bursaphelenchus xylophilus]
Hg3351.1	KAF7635336.1	192	1	62	112	1.75e-12	KAF7635336.1 PH domain-containing protein, partial [Meloidogyne graminicola]
Hg3441.1	KAH7714080.1	107	238	714	757	5.49e-13	KAH7714080.1 BTB/POZ domain-containing protein 8 [Aphelenchus avenae]
Hg3481.1	CAD2204863.1	1561	1785	19	93	5.05e-11	CAD2204863.1 unnamed protein product [Meloidogyne enterolobii]
Hg3484.1	CAD2204998.1	48	563	89	204	4.64e-12	CAD2204998.1 unnamed protein product [Meloidogyne enterolobii]
Hg3530.1	CAD2123094.1	669	884	222	293	9.27e-24	CAD2123094.1 unnamed protein product [Meloidogyne enterolobii]
Hg3762.1	CAD2195390.1	309	1490	5	339	8.22e-43	CAD2195390.1 unnamed protein product [Meloidogyne enterolobii]
Hg3903.1	AAO85455.1	1061	1312	11	94	1.07e-37	AAO85455.1 putative gland protein G17G06 [Heterodera glycines]
Hg4745.1	CAD2189778.1	845	435	138	237	1.69e-24	CAD2189778.1 unnamed protein product [Meloidogyne enterolobii]
Hg4834.1	CAD2195513.1	5	1948	91	741	1.15e-139	CAD2195513.1 unnamed protein product [Meloidogyne enterolobii]
Hg5052.1	CAD2145063.1	148	492	134	248	2.29e-67	CAD2145063.1 unnamed protein product [Meloidogyne enterolobii]
Hg5190.1	XP_003117885.1	493	609	2	40	5.08e-08	XP_003117885.1 hypothetical protein CRE_00424 [Caenorhabditis remanei] EFO82483.1 hypothetical protein CRE_00424 [Caenorhabditis remanei]
Hg5217.1	CAD2204630.1	37	321	1188	1284	5.87e-14	CAD2204630.1 unnamed protein product [Meloidogyne enterolobii]
Hg5377.1	VDN60559.1	31	201	1	57	1.9e-25	VDN60559.1 unnamed protein product [Dracunculus medinensis]
Hg5529.2	CAG9477171.1	324	25	605	699	3.73e-09	CAG9477171.1 unnamed protein product [Plasmodium vivax]
Hg5744.1	AAW33663.1	53	172	1	40	4.61e-17	AAW33663.1 unknown [Heterodera glycines]
Hg6030.1	CAD2194283.1	29	619	2	198	1.82e-105	CAD2194283.1 unnamed protein product [Meloidogyne enterolobii]
Hg6114.1	CAD2169003.1	923	1174	215	296	1.03e-28	CAD2169003.1 unnamed protein product [Meloidogyne enterolobii]
Hg6136.1	KAI1701870.1	673	488	1	62	1.3e-13	KAI1701870.1 hypothetical protein DdX_15815 [Ditylenchus destructor]
Hg6193.1	AAL78215.1	524	3	85	258	2.4e-83	AAL78215.1 probable polyprotein allergen Hgg-14, partial [Heterodera glycines]
Hg6217.1	CAD2122864.1	339	809	475	630	7.91e-60	CAD2122864.1 unnamed protein product [Meloidogyne enterolobii]
Hg6280.1	CAD2206737.1	9	182	267	323	7.06e-14	CAD2206737.1 unnamed protein product [Meloidogyne enterolobii]
Hg6451.1	XP_045600054.1	529	326	119	186	1.98e-19	XP_045600054.1 keratin, type I cytoskeletal 9-like [Procambarus clarkii]
Hg6451.2	XP_045600054.1	647	336	119	222	4.26e-25	XP_045600054.1 keratin, type I cytoskeletal 9-like [Procambarus clarkii]
Hg6451.3	XP_045600054.1	451	248	189	256	1.74e-13	XP_045600054.1 keratin, type I cytoskeletal 9-like [Procambarus clarkii]
Hg6575.1	KAF7632138.1	2	280	500	615	5.74e-07	KAF7632138.1 hypothetical protein Mgra_00008450 [Meloidogyne graminicola]
Hg6742.1	KAI1730402.1	11	388	326	409	2.61e-17	KAI1730402.1 platelet-activating factor acetylhydrolase, isoform II domain-containing protein [Ditylenchus destructor]
Hg6995.1	KAH7725483.1	354	599	2	82	5.9e-29	KAH7725483.1 Nematode cuticle collagen [Aphelenchus avenae]
Hg7066.1	CAD2150072.1	18	701	566	802	1.75e-90	CAD2150072.1 unnamed protein product [Meloidogyne enterolobii]
Hg7227.1	KAI1724613.1	46	534	729	880	2.81e-19	KAI1724613.1 type III restriction enzyme, res subunit family protein [Ditylenchus destructor]
Hg7484.1	KAF7639633.1	275	550	442	507	2.09e-20	KAF7639633.1 hypothetical protein Mgra_00000958 [Meloidogyne graminicola]
Hg7602.1	EJW83130.1	196	387	78	141	2.34e-29	EJW83130.1 lysyl-tRNA synthetase [Wuchereria bancrofti]
Hg7627.1	KAI1724336.1	84	359	1190	1281	4.88e-27	KAI1724336.1 ABC transporter domain-containing protein [Ditylenchus destructor]
Hg7670.1	XP_001433426.1	107	649	18	203	1.52e-25	XP_001433426.1 hypothetical protein [Paramecium tetraurelia strain d4-2] CAK66029.1 unnamed protein product [Paramecium tetraurelia]
Hg7730.1	CAD2200848.1	10	579	2449	2642	2.57e-33	CAD2200848.1 unnamed protein product [Meloidogyne enterolobii]
Hg7804.1	CAD2208944.1	10638	12872	2	744	0	CAD2208944.1 unnamed protein product [Meloidogyne enterolobii]
Hg7930.2	CAD2178374.1	365	613	1	124	4.72e-22	CAD2178374.1 unnamed protein product, partial [Meloidogyne enterolobii]
Hg8117.1	CAD2175471.1	178	546	8	131	7.05e-67	CAD2175471.1 unnamed protein product [Meloidogyne enterolobii]
Hg8281.1	CAD2201342.1	1	417	212	350	7.87e-84	CAD2201342.1 unnamed protein product [Meloidogyne enterolobii]
Hg8288.1	TKR77607.1	572	781	98	167	5.63e-34	TKR77607.1 hypothetical protein L596_018542 [Steinernema carpocapsae]
Hg8303.1	KAI1730920.1	556	678	459	499	2.2e-15	KAI1730920.1 tRNA synthetases class II core domain (F) domain-containing protein [Ditylenchus destructor]
Hg8558.1	KAF7633691.1	38	439	144	274	8.33e-48	KAF7633691.1 TIMELESS domain-containing protein [Meloidogyne graminicola]
Hg8631.1	CAD2138960.1	81	764	21	253	9.57e-85	CAD2138960.1 unnamed protein product [Meloidogyne enterolobii]
Hg8669.1	CAD2184698.1	77	361	57	149	4.29e-30	CAD2184698.1 unnamed protein product [Meloidogyne enterolobii]
Hg8859.1	AVA09687.1	18	197	267	326	1.52e-32	AVA09687.1 putative effector protein [Heterodera avenae] AVA09729.1 putative effector protein [Heterodera avenae]
Hg9035.1	XP_001433426.1	68	610	18	203	4.43e-28	XP_001433426.1 hypothetical protein [Paramecium tetraurelia strain d4-2] CAK66029.1 unnamed protein product [Paramecium tetraurelia]
Hg9099.1	CAD2201452.1	122	304	311	371	4.52e-16	CAD2201452.1 unnamed protein product [Meloidogyne enterolobii]
Hg9181.2	CAD2124646.1	7	1059	849	1195	8.75e-116	CAD2124646.1 unnamed protein product [Meloidogyne enterolobii]
Hg9246.1	CAD2138877.1	2175	2414	2	81	3e-31	CAD2138877.1 unnamed protein product [Meloidogyne enterolobii]
Hg9374.1	CAD2174660.1	565	1131	55	254	3.25e-15	CAD2174660.1 unnamed protein product [Meloidogyne enterolobii]
Hg9388.1	KAH7720322.1	868	1419	509	680	3.1e-36	KAH7720322.1 Protein Y46E12BL.2 [Aphelenchus avenae]
Hg10511.1	CAD2186350.1	204	1232	407	735	6.03e-86	CAD2186350.1 unnamed protein product [Meloidogyne enterolobii]
Hg10658.1	VDO28088.1	1	453	8	158	1.21e-89	VDO28088.1 unnamed protein product [Brugia timori]
Hg10814.1	CAD2207291.1	823	1374	474	650	1.03e-88	CAD2207291.1 unnamed protein product [Meloidogyne enterolobii]
Hg10903.1	CAD2162232.1	760	948	46	108	1.19e-21	CAD2162232.1 unnamed protein product [Meloidogyne enterolobii]
Hg10906.1	KAH7697541.1	1	252	9	92	1.23e-49	KAH7697541.1 splicing factor 3B subunit 5 [Aphelenchus avenae]
Hg10911.1	CAD2178196.1	3	164	80	133	1.57e-21	CAD2178196.1 unnamed protein product [Meloidogyne enterolobii]
Hg10971.1	CAD2181549.1	1	153	296	346	7.04e-19	CAD2181549.1 unnamed protein product [Meloidogyne enterolobii]
Hg10972.1	CAD5234033.1	4	309	329	428	3.93e-26	CAD5234033.1 unnamed protein product [Bursaphelenchus xylophilus] CAG9129583.1 unnamed protein product [Bursaphelenchus xylophilus]
Hg11173.1	TKR60190.1	402	707	260	349	4.1e-07	TKR60190.1 hypothetical protein L596_027478 [Steinernema carpocapsae]
Hg11394.1	AAW33667.1	64	318	1	85	3.27e-23	AAW33667.1 unknown [Heterodera glycines]
Hg11748.1	XP_046359670.1	340	143	89	154	8.5e-19	XP_046359670.1 endochitinase A-like [Haliotis rufescens]
Hg11771.1	KAH7717320.1	2	1357	1051	1494	6.77e-104	KAH7717320.1 pol polyprotein [Aphelenchus avenae]
Hg11952.1	CAD2184079.1	109	495	459	583	8.46e-22	CAD2184079.1 unnamed protein product [Meloidogyne enterolobii]
Hg12202.1	CAD2194514.1	20	1585	233	733	1.89e-162	CAD2194514.1 unnamed protein product [Meloidogyne enterolobii]
Hg12827.1	CAD2178948.1	2	340	213	316	3.55e-27	CAD2178948.1 unnamed protein product [Meloidogyne enterolobii]
Hg12831.2	KAF7639613.1	1023	1889	353	652	4.2e-16	KAF7639613.1 hypothetical protein Mgra_00000937 [Meloidogyne graminicola]
Hg12831.1	KAF7639613.1	1308	2174	353	652	3.23e-16	KAF7639613.1 hypothetical protein Mgra_00000937 [Meloidogyne graminicola]
Hg12831.3	KAF7639613.1	66	539	1063	1218	8.22e-44	KAF7639613.1 hypothetical protein Mgra_00000937 [Meloidogyne graminicola]
Hg12837.1	CAD2178948.1	2	628	116	316	1.25e-74	CAD2178948.1 unnamed protein product [Meloidogyne enterolobii]
Hg12883.1	KAI1717967.1	759	121	20	194	3.85e-26	KAI1717967.1 transmembrane protein [Ditylenchus destructor]
Hg12892.1	KAH7728774.1	327	593	3	87	1.59e-12	KAH7728774.1 Protein F26E4.6 [Aphelenchus avenae]
Hg13021.1	KAI1717400.1	1	225	1432	1506	1.02e-29	KAI1717400.1 SET domain-containing protein [Ditylenchus destructor]
Hg13027.1	CAD7231778.1	301	11	501	605	5.65e-16	CAD7231778.1 unnamed protein product, partial [Cyprideis torosa] CAG0899426.1 unnamed protein product, partial [Cyprideis torosa]
Hg13038.1	CAD2166172.1	220	125	277	308	1.7e-07	CAD2166172.1 unnamed protein product [Meloidogyne enterolobii]
Hg13134.1	KAI1731754.1	397	912	1000	1141	1.73e-41	KAI1731754.1 FAD binding domain-containing protein [Ditylenchus destructor]
Hg13444.1	OWF37691.1	839	1453	14	209	6.5e-17	OWF37691.1 PPE family protein PPE21 [Mizuhopecten yessoensis]
Hg13574.1	CAD2207218.1	5	481	42	197	2.94e-63	CAD2207218.1 unnamed protein product [Meloidogyne enterolobii]
Hg13679.1	KAE8751168.1	1285	1641	322	433	3.52e-37	KAE8751168.1 hypothetical protein FOCC_FOCC002252 [Frankliniella occidentalis]
Hg13679.2	XP_044596984.1	678	1034	148	263	3.21e-25	XP_044596984.1 uncharacterized protein LOC123273610 [Cotesia glomerata]
Hg13982.1	RFU23844.1	1245	1394	174	223	4.72e-06	RFU23844.1 hypothetical protein B7463_g12494, partial [Scytalidium lignicola]
Hg14394.1	CAD2124646.1	226	1014	827	1087	1.28e-106	CAD2124646.1 unnamed protein product [Meloidogyne enterolobii]
Hg14537.1	CAD2200353.1	3	440	118	263	3.7e-83	CAD2200353.1 unnamed protein product, partial [Meloidogyne enterolobii]
Hg14629.1	KAF7633841.1	2	145	725	772	4.62e-07	KAF7633841.1 DNA helicase [Meloidogyne graminicola]
Hg14638.1	KAH7708786.1	268	468	59	126	1.09e-08	KAH7708786.1 Protein Y57E12AL.6 [Aphelenchus avenae]
Hg14651.1	CAD2175160.1	120	611	44	178	2.29e-45	CAD2175160.1 unnamed protein product [Meloidogyne enterolobii]
Hg14721.1	AAP41028.1	255	446	344	407	5.66e-38	AAP41028.1 arginine kinase [Heterodera glycines]
Hg14805.1	KAF7629211.1	339	758	1	140	8.61e-81	KAF7629211.1 hypothetical protein Mgra_00009274 [Meloidogyne graminicola] CAD2177972.1 unnamed protein product [Meloidogyne enterolobii] CAD2191564.1 unnamed protein product [Meloidogyne enterolobii]
Hg14855.1	CAD2207369.1	160	726	21	209	9.46e-93	CAD2207369.1 unnamed protein product [Meloidogyne enterolobii]
Hg15024.1	KAF7636427.1	238	131	83	118	2.28e-07	KAF7636427.1 G_PROTEIN_RECEP_F1_2 domain-containing protein [Meloidogyne graminicola]
Hg15352.1	KAF7635354.1	313	564	456	543	2.6e-18	KAF7635354.1 hypothetical protein Mgra_00005176 [Meloidogyne graminicola]
Hg15367.1	KAF7638997.1	1254	1838	110	305	4.82e-74	KAF7638997.1 Serine/threonine-protein phosphatase [Meloidogyne graminicola]
Hg15382.1	KAI1731640.1	119	436	1	106	3.36e-62	KAI1731640.1 ribosomal protein l44 domain-containing protein [Ditylenchus destructor]
Hg15670.2	CAD2174611.1	44	433	13	146	7.13e-29	CAD2174611.1 unnamed protein product [Meloidogyne enterolobii]
Hg15761.1	CAD2184718.1	40	606	196	406	1.79e-48	CAD2184718.1 unnamed protein product [Meloidogyne enterolobii]
Hg15904.1	KAF7635165.1	2	316	47	152	1.27e-26	KAF7635165.1 hypothetical protein Mgra_00005450 [Meloidogyne graminicola]
Hg15918.1	CAD2180957.1	2046	2960	425	740	1.92e-128	CAD2180957.1 unnamed protein product [Meloidogyne enterolobii]
Hg15967.1	KAH8327691.1	1	201	98	164	4.18e-19	KAH8327691.1 hypothetical protein KR074_010351 [Drosophila pseudoananassae]
Hg16080.1	KAI1729134.1	642	881	19	100	7.46e-14	KAI1729134.1 hypothetical protein DdX_01355 [Ditylenchus destructor]
Hg16266.1	CAD2166802.1	289	507	80	152	1.28e-33	CAD2166802.1 unnamed protein product [Meloidogyne enterolobii] CAD2193260.1 unnamed protein product [Meloidogyne enterolobii] CAD2195520.1 unnamed protein product [Meloidogyne enterolobii]
Hg16280.1	KAF7634065.1	10	276	399	484	8.1e-33	KAF7634065.1 hypothetical protein Mgra_00006483, partial [Meloidogyne graminicola]
Hg16436.1	KAF7624672.1	22	603	1	195	5.04e-127	KAF7624672.1 40S ribosomal protein S7 [Meloidogyne graminicola] KAF7639222.1 40S ribosomal protein S7 [Meloidogyne graminicola]
Hg16521.1	VDK43386.1	163	480	1	106	2.42e-38	VDK43386.1 unnamed protein product [Anisakis simplex]
Hg16656.2	AAF76925.1	157	723	1	150	2.59e-77	AAF76925.1 hypothetical esophageal gland cell secretory protein 11 [Heterodera glycines]
Hg16773.1	CAD2207448.1	247	1086	42	337	1.48e-36	CAD2207448.1 unnamed protein product [Meloidogyne enterolobii]
Hg17013.1	CAD56892.1	866	991	129	170	9.37e-13	CAD56892.1 LIN-45 RAF [Meloidogyne artiellia]
Hg17013.2	CAD56892.1	714	839	129	170	5.1e-13	CAD56892.1 LIN-45 RAF [Meloidogyne artiellia]
Hg17647.2	KAH1188079.1	1172	927	187	262	2.52e-49	KAH1188079.1 putative uncharacterized protein ART2 [Glycine max]
Hg17650.2	CAD2161480.1	1048	605	56	209	4.86e-39	CAD2161480.1 unnamed protein product [Meloidogyne enterolobii]
Hg17718.1	XP_015108615.1	117	344	1	76	4.89e-41	XP_015108615.1 NEDD8 [Diachasma alloeum]
Hg17782.1	CAD2207986.1	1	1278	8	433	0	CAD2207986.1 unnamed protein product [Meloidogyne enterolobii]
Hg17787.1	CAD2189704.1	119	949	157	433	9.63e-145	CAD2189704.1 unnamed protein product [Meloidogyne enterolobii] CAD2204378.1 unnamed protein product [Meloidogyne enterolobii]
Hg17806.1	CAD2130944.1	2	514	760	900	4.39e-43	CAD2130944.1 unnamed protein product [Meloidogyne enterolobii]
Hg17827.1	CAD2134819.1	542	1003	253	406	1.27e-17	CAD2134819.1 unnamed protein product [Meloidogyne enterolobii]
Hg17870.1	CAD2134657.1	270	509	17	96	4.78e-30	CAD2134657.1 unnamed protein product [Meloidogyne enterolobii]
Hg17871.1	KAH7710935.1	185	1045	199	482	4.74e-61	KAH7710935.1 low-affinity peptide transporter [Aphelenchus avenae]
Hg17915.1	CAD2181153.1	505	1233	427	649	9.28e-57	CAD2181153.1 unnamed protein product [Meloidogyne enterolobii]
Hg17916.1	CAD2181153.1	4	210	795	863	3.51e-06	CAD2181153.1 unnamed protein product [Meloidogyne enterolobii]
Hg18081.1	CAD2167865.1	26	427	419	534	2.8e-50	CAD2167865.1 unnamed protein product [Meloidogyne enterolobii]
Hg18081.2	CAD2167865.1	12	728	528	732	5.48e-19	CAD2167865.1 unnamed protein product [Meloidogyne enterolobii]
Hg18082.1	CAD2167866.1	46	303	1	79	9.68e-26	CAD2167866.1 unnamed protein product [Meloidogyne enterolobii]
Hg18239.2	CAD2159457.1	334	492	2	55	5.09e-11	CAD2159457.1 unnamed protein product [Meloidogyne enterolobii]
Hg18249.1	CAD2170232.1	81	458	44	171	3.22e-49	CAD2170232.1 unnamed protein product [Meloidogyne enterolobii]
Hg18387.1	KAF7637475.1	1464	1835	21	156	1.23e-20	KAF7637475.1 Major sperm protein [Meloidogyne graminicola]
Hg18413.1	CAD2199439.1	37	279	268	348	4.2e-21	CAD2199439.1 unnamed protein product [Meloidogyne enterolobii]
Hg18448.1	CAD2158514.1	1	288	166	261	1.49e-52	CAD2158514.1 unnamed protein product [Meloidogyne enterolobii] CAD2164556.1 unnamed protein product [Meloidogyne enterolobii] CAD2184615.1 unnamed protein product [Meloidogyne enterolobii]
Hg18457.2	CAD2172005.1	776	1000	44	118	4.38e-11	CAD2172005.1 unnamed protein product [Meloidogyne enterolobii]
Hg18551.1	VDK46823.1	266	730	16	179	1.01e-34	VDK46823.1 unnamed protein product, partial [Cylicostephanus goldi]
Hg307.1	-	-	-	-	-	-	#N/A
Hg359.2	-	-	-	-	-	-	#N/A
Hg383.1	-	-	-	-	-	-	#N/A
Hg386.1	-	-	-	-	-	-	#N/A
Hg634.1	-	-	-	-	-	-	#N/A
Hg847.1	-	-	-	-	-	-	#N/A
Hg1014.1	-	-	-	-	-	-	#N/A
Hg1159.3	-	-	-	-	-	-	#N/A
Hg1189.1	-	-	-	-	-	-	#N/A
Hg1248.1	-	-	-	-	-	-	#N/A
Hg1301.1	-	-	-	-	-	-	#N/A
Hg1603.1	-	-	-	-	-	-	#N/A
Hg1677.1	-	-	-	-	-	-	#N/A
Hg1956.1	-	-	-	-	-	-	#N/A
Hg2033.1	-	-	-	-	-	-	#N/A
Hg2032.1	-	-	-	-	-	-	#N/A
Hg2085.1	-	-	-	-	-	-	#N/A
Hg2175.1	-	-	-	-	-	-	#N/A
Hg2374.1	-	-	-	-	-	-	#N/A
Hg2375.1	-	-	-	-	-	-	#N/A
Hg2512.1	-	-	-	-	-	-	#N/A
Hg2816.1	-	-	-	-	-	-	#N/A
Hg3280.2	-	-	-	-	-	-	#N/A
Hg3293.1	-	-	-	-	-	-	#N/A
Hg3644.2	-	-	-	-	-	-	#N/A
Hg3660.1	-	-	-	-	-	-	#N/A
Hg3794.2	-	-	-	-	-	-	#N/A
Hg4014.1	-	-	-	-	-	-	#N/A
Hg4082.1	-	-	-	-	-	-	#N/A
Hg4264.1	-	-	-	-	-	-	#N/A
Hg4358.1	-	-	-	-	-	-	#N/A
Hg4504.2	-	-	-	-	-	-	#N/A
Hg4551.1	-	-	-	-	-	-	#N/A
Hg4589.1	-	-	-	-	-	-	#N/A
Hg4591.1	-	-	-	-	-	-	#N/A
Hg4972.1	-	-	-	-	-	-	#N/A
Hg4983.1	-	-	-	-	-	-	#N/A
Hg5016.1	-	-	-	-	-	-	#N/A
Hg5177.2	-	-	-	-	-	-	#N/A
Hg5177.4	-	-	-	-	-	-	#N/A
Hg5297.1	-	-	-	-	-	-	#N/A
Hg5300.1	-	-	-	-	-	-	#N/A
Hg5378.1	-	-	-	-	-	-	#N/A
Hg5729.1	-	-	-	-	-	-	#N/A
Hg6051.1	-	-	-	-	-	-	#N/A
Hg6119.1	-	-	-	-	-	-	#N/A
Hg6144.2	-	-	-	-	-	-	#N/A
Hg6209.1	-	-	-	-	-	-	#N/A
Hg6210.2	-	-	-	-	-	-	#N/A
Hg6215.1	-	-	-	-	-	-	#N/A
Hg6416.2	-	-	-	-	-	-	#N/A
Hg6416.1	-	-	-	-	-	-	#N/A
Hg6562.1	-	-	-	-	-	-	#N/A
Hg6690.5	-	-	-	-	-	-	#N/A
Hg6832.1	-	-	-	-	-	-	#N/A
Hg6944.1	-	-	-	-	-	-	#N/A
Hg7189.1	-	-	-	-	-	-	#N/A
Hg7280.1	-	-	-	-	-	-	#N/A
Hg7289.1	-	-	-	-	-	-	#N/A
Hg7374.2	-	-	-	-	-	-	#N/A
Hg7584.1	-	-	-	-	-	-	#N/A
Hg7803.1	-	-	-	-	-	-	#N/A
Hg8066.1	-	-	-	-	-	-	#N/A
Hg8289.1	-	-	-	-	-	-	#N/A
Hg8870.1	-	-	-	-	-	-	#N/A
Hg8956.1	-	-	-	-	-	-	#N/A
Hg9015.1	-	-	-	-	-	-	#N/A
Hg9100.1	-	-	-	-	-	-	#N/A
Hg9387.1	-	-	-	-	-	-	#N/A
Hg9446.1	-	-	-	-	-	-	#N/A
Hg9507.1	-	-	-	-	-	-	#N/A
Hg9795.1	-	-	-	-	-	-	#N/A
Hg10143.1	-	-	-	-	-	-	#N/A
Hg10162.1	-	-	-	-	-	-	#N/A
Hg10283.1	-	-	-	-	-	-	#N/A
Hg10306.2	-	-	-	-	-	-	#N/A
Hg10785.1	-	-	-	-	-	-	#N/A
Hg11056.1	-	-	-	-	-	-	#N/A
Hg11057.1	-	-	-	-	-	-	#N/A
Hg11185.1	-	-	-	-	-	-	#N/A
Hg11202.1	-	-	-	-	-	-	#N/A
Hg11275.1	-	-	-	-	-	-	#N/A
Hg11381.1	-	-	-	-	-	-	#N/A
Hg11537.2	-	-	-	-	-	-	#N/A
Hg11537.1	-	-	-	-	-	-	#N/A
Hg11869.1	-	-	-	-	-	-	#N/A
Hg11964.2	-	-	-	-	-	-	#N/A
Hg11964.1	-	-	-	-	-	-	#N/A
Hg11973.1	-	-	-	-	-	-	#N/A
Hg12227.1	-	-	-	-	-	-	#N/A
Hg12570.1	-	-	-	-	-	-	#N/A
Hg12735.1	-	-	-	-	-	-	#N/A
Hg13022.1	-	-	-	-	-	-	#N/A
Hg13100.1	-	-	-	-	-	-	#N/A
Hg13271.1	-	-	-	-	-	-	#N/A
Hg13271.2	-	-	-	-	-	-	#N/A
Hg13271.3	-	-	-	-	-	-	#N/A
Hg13271.4	-	-	-	-	-	-	#N/A
Hg13271.5	-	-	-	-	-	-	#N/A
Hg13271.6	-	-	-	-	-	-	#N/A
Hg13271.7	-	-	-	-	-	-	#N/A
Hg13271.8	-	-	-	-	-	-	#N/A
Hg13949.1	-	-	-	-	-	-	#N/A
Hg13991.1	-	-	-	-	-	-	#N/A
Hg13993.2	-	-	-	-	-	-	#N/A
Hg13993.12	-	-	-	-	-	-	#N/A
Hg13993.15	-	-	-	-	-	-	#N/A
Hg14102.1	-	-	-	-	-	-	#N/A
Hg14322.1	-	-	-	-	-	-	#N/A
Hg14338.1	-	-	-	-	-	-	#N/A
Hg14397.1	-	-	-	-	-	-	#N/A
Hg14776.2	-	-	-	-	-	-	#N/A
Hg15188.1	-	-	-	-	-	-	#N/A
Hg15432.1	-	-	-	-	-	-	#N/A
Hg15432.2	-	-	-	-	-	-	#N/A
Hg15491.1	-	-	-	-	-	-	#N/A
Hg15591.3	-	-	-	-	-	-	#N/A
Hg15837.1	-	-	-	-	-	-	#N/A
Hg15927.3	-	-	-	-	-	-	#N/A
Hg15950.2	-	-	-	-	-	-	#N/A
Hg15954.1	-	-	-	-	-	-	#N/A
Hg15952.2	-	-	-	-	-	-	#N/A
Hg15952.3	-	-	-	-	-	-	#N/A
Hg15954.2	-	-	-	-	-	-	#N/A
Hg15959.2	-	-	-	-	-	-	#N/A
Hg15994.1	-	-	-	-	-	-	#N/A
Hg16038.1	-	-	-	-	-	-	#N/A
Hg16106.1	-	-	-	-	-	-	#N/A
Hg16284.1	-	-	-	-	-	-	#N/A
Hg16373.1	-	-	-	-	-	-	#N/A
Hg16373.2	-	-	-	-	-	-	#N/A
Hg16487.1	-	-	-	-	-	-	#N/A
Hg17018.1	-	-	-	-	-	-	#N/A
Hg17305.1	-	-	-	-	-	-	#N/A
Hg17403.1	-	-	-	-	-	-	#N/A
Hg17681.1	-	-	-	-	-	-	#N/A
Hg17708.1	-	-	-	-	-	-	#N/A
Hg18202.1	-	-	-	-	-	-	#N/A
Hg18263.1	-	-	-	-	-	-	#N/A

## Sheet: Supp. Table 3
Single nematode transcriptomic analysis, using long-read technology, reveals two novel virulence gene candidates in the soybean cyst nematode, Heterodera glycines
Dave T. Ste-Croix 1,2, Richard R. Bélanger 2,,3 and Benjamin Mimee1
1 Saint-Jean-sur-Richelieu Research and Development Centre, Agriculture and Agri-Food Canada, Saint-Jean-sur-Richelieu, Québec, Canada
2 Département de Phytologie, Université Laval, Québec, Québec, Canada
3 Centre de recherche et d'innovation sur les végétaux (CRIV), Université Laval, Québec, Québec, Canada
Supp. Table 3. Differentially expressed transcript in Heterodera glycines PI88788-vir females with associated fold-changes, adjusted P-values, secretion predictions values from SignalP 6.0, SecretomeP 2.0 and DeepLoc2, and blast annotations.
Ids	log2FC	log2CPM	Adjusted P-value	SignalP_6.0	SecretomeP_2.0	DeepLoc_2.0_Localization	DeepLoc_2.0_Location_signal	BLASTx	E_value
Hetgly07584.t1	3.31357	7.24331	2.36e-15	0	0.203	Cytoplasm	Nuclear export signal	AEG64708.1 14-3-3 protein [Heterodera glycines]	2.55e-170
Hg16414.1	3.47417	10.8982	2.76e-11	0.972868	0.691	Extracellular	Signal peptide	AVA09678.1 putative effector protein [Heterodera avenae]	6.27e-117
Hg8859.1	4.14471	6.30613	8.37e-20	0.442	0.755	Extracellular	Signal peptide	AVA09687.1 putative effector protein [Heterodera avenae]	1.52e-32
Hg2636.1	3.75442	7.96253	3.52e-21	0	0.269	Cytoplasm|Nucleus	Nuclear localization signal|Nuclear export signal	AZN18355.1 eukaryotic translation initiation factor 5A, partial [Radopholus similis]	2.03e-69
Hetgly07480.t1	2.64202	5.8369	2.76e-11	0.999853	0.868	Extracellular	Signal peptide	CAD2152915.1 unnamed protein product [Meloidogyne enterolobii]	4.15e-33
Hg18082.1	2.44668	8.63258	4.84e-11	0	0.312	Nucleus	Nuclear localization signal	CAD2167866.1 unnamed protein product [Meloidogyne enterolobii]	9.68e-26
Hetgly20423.t1	3.36192	6.72817	8.94e-11	0	0.726	Nucleus	Nuclear localization signal	CAD2170438.1 unnamed protein product [Meloidogyne enterolobii] CAD2203607.1 unnamed protein product [Meloidogyne enterolobii]	2.21e-31
Hetgly21714.t1	2.71795	7.70464	4.24e-12	0	0.35	Nucleus	Signal peptide	CAD2194890.1 unnamed protein product [Meloidogyne enterolobii]	9.22e-58
Hetgly21799.t1	3.23843	4.65745	1.63e-11	0	0.75	Nucleus	Nuclear localization signal	CAD2202259.1 unnamed protein product [Meloidogyne enterolobii]	9.5e-44
Hetgly18488.t1	4.14175	5.06683	6.36e-11	0	0.588	Nucleus	#N/A	CAL30085.1 polyubiquitin [Globodera pallida]	6.79e-104
Hetgly04491.t1	4.03412	5.15475	4.2e-11	0.999878	0.898	Extracellular	Signal peptide	CAM84511.1 transthyretin-like protein 2 precursor [Radopholus similis]	7.48e-61
Hetgly21254.t1	4.12469	5.40791	2.82e-12	0	0.516	Mitochondrion	Mitochondrial transit peptide	CDJ83329.1 Mitochondrial glycoprotein domain containing protein [Haemonchus contortus]	1.94e-68
Hg16300.2	2.75818	8.93957	7.93e-11	0	0.135	Cytoplasm	Nuclear localization signal	CDJ94557.1 C. briggsae CBR-TAG-297 protein [Haemonchus contortus]	0
Hg14649.1	3.1122	8.9991	1.62e-13	0	0.357	Cytoplasm	Nuclear localization signal	DAA05871.1 TPA_inf: eukaryotic translation elongation factor 1A [Heterodera glycines]	0
Hetgly04296.t1	3.45405	6.94944	4.69e-13	0	0.319	Cytoplasm	#N/A	EPB76193.1 peptidyl-prolyl cis-trans isomerase, cyclophilin-type [Ancylostoma ceylanicum]	6.79e-96
Hetgly17848.t1	2.75081	7.69109	3.28e-15	0	0.268	Cytoplasm|Nucleus	Nuclear localization signal	EPB78478.1 BTB/POZ domain protein [Ancylostoma ceylanicum]	0
Hetgly20016.t1	2.94581	6.6331	1.38e-12	0	0.234	Cytoplasm|Nucleus	Nuclear localization signal	KAF7624755.1 Serine/threonine-protein kinase RIO1 [Meloidogyne graminicola]	0
Hetgly07358.t1	2.665	7.21324	4.91e-12	5e-06	0.298	Mitochondrion	Mitochondrial transit peptide	KAF7627293.1 hypothetical protein Mgra_00009408 [Meloidogyne graminicola]	1.19e-27
Hetgly03530.t1	2.25006	7.05121	9.88e-13	0	0.369	Cytoplasm|Nucleus	Nuclear localization signal|Nuclear export signal	KAF7629286.1 TPR_REGION domain-containing protein [Meloidogyne graminicola]	1.76e-23
Hetgly10179.t1	3.55812	6.79559	9.94e-14	0	0.598	Cytoplasm	Nuclear localization signal	KAF7632644.1 Ribosomal_L16 domain-containing protein [Meloidogyne graminicola]	5.37e-147
Hetgly13241.t1	4.17015	10.7138	9.16e-21	0	0.28	Endoplasmic reticulum	Signal peptide	KAF7634539.1 Cysteine dioxygenase [Meloidogyne graminicola]	7.05e-74
Hetgly09741.t1	2.84978	6.13275	1.87e-11	0.427584	0.298	Cytoplasm	Signal peptide	KAF7634676.1 TPR_REGION domain-containing protein [Meloidogyne graminicola]	8.21e-156
Hetgly21677.t1	4.49095	4.76849	2.17e-12	0.99987	0.43	Extracellular	Signal peptide	KAF7634869.1 AAA domain-containing protein [Meloidogyne graminicola]	1.02e-41
Hetgly04282.t2	3.33158	6.63487	3.91e-11	0	0.637	Nucleus	Nuclear localization signal	KAF7634929.1 HMG box domain-containing protein [Meloidogyne graminicola]	5.99e-53
Hetgly00929.t1	2.97354	6.74094	2.76e-11	0	0.596	Cytoplasm|Nucleus	Nuclear localization signal	KAF7635024.1 eIF2B_5 domain-containing protein [Meloidogyne graminicola]	3.51e-105
Hetgly01872.t1	2.83118	6.12681	6.92e-11	0	0.342	Nucleus	Nuclear localization signal	KAF7635166.1 One cut domain family member [Meloidogyne graminicola]	0
Hetgly13498.t1	4.16051	6.44062	2.03e-17	0	0.567	Cytoplasm	Peroxisomal targeting signal	KAF7635519.1 Amidohydro-rel domain-containing protein [Meloidogyne graminicola]	0
Hetgly02007.t1	3.09629	6.32902	7.57e-11	0	0.139	Nucleus	Nuclear localization signal	KAF7635550.1 hypothetical protein Mgra_00005092 [Meloidogyne graminicola]	1.05e-24
Hetgly17678.t1	3.5389	6.2676	1.03e-11	0	0.689	Cytoplasm	Nuclear export signal	KAF7635664.1 Clathrin light chain [Meloidogyne graminicola]	1.83e-30
Hetgly04490.t1	3.24334	6.08079	8.65e-16	0.999806	0.735	Lysosome/Vacuole	Signal peptide	KAF7636717.1 Glyco_hydro_35 domain-containing protein [Meloidogyne graminicola]	0
Hetgly06837.t1	2.11038	6.78101	5.43e-11	0	0.305	Cytoplasm	#N/A	KAF7637154.1 Glutamate synthase NADPH [Meloidogyne graminicola]	0
Hetgly10002.t1	2.68381	6.09311	8.59e-11	0	0.772	Nucleus	Nuclear localization signal	KAF7637276.1 RRM domain-containing protein [Meloidogyne graminicola]	2.34e-119
Hetgly09973.t1	2.82168	6.4689	2.29e-11	0.166001	0.539	Mitochondrion	Mitochondrial transit peptide	KAF7637317.1 TPR_REGION domain-containing protein [Meloidogyne graminicola]	2e-72
Hetgly15570.t1	3.59944	5.72787	2.93e-14	0	0.636	Cytoplasm	Nuclear localization signal	KAF7637700.1 PKS_ER domain-containing protein [Meloidogyne graminicola]	0
Hetgly06634.t1	2.60128	9.17655	8.94e-11	0	0.235	Nucleus	Nuclear localization signal	KAF7637717.1 hypothetical protein Mgra_00002976 [Meloidogyne graminicola]	1.77e-22
Hg8486.1	3.96792	7.92127	1.2e-11	0	0.681	Endoplasmic reticulum|Lysosome/Vacuole	Signal peptide|Transmembrane domain	KAF7637870.1 hypothetical protein Mgra_00002574 [Meloidogyne graminicola]	5.28e-24
Hetgly21589.t1	4.81593	6.59388	8.41e-14	0	0.392	Cytoplasm	Nuclear localization signal	KAF7638082.1 40S ribosomal protein S3a [Meloidogyne graminicola]	1.17e-147
Hetgly06942.t1	3.554	5.67332	5.95e-13	0	0.442	Cell membrane	Signal peptide|Transmembrane domain	KAF7638290.1 Aamy domain-containing protein [Meloidogyne graminicola]	4.24e-125
Hetgly08995.t1	2.26067	7.24677	1.95e-11	0	0.759	Mitochondrion	Mitochondrial transit peptide	KAF7638520.1 Acyl carrier protein [Meloidogyne graminicola]	2.08e-26
Hg17540.2	3.30277	7.65551	3.95e-11	0	0.769	Nucleus	Nuclear localization signal	KAF7639258.1 40S ribosomal protein S6, partial [Meloidogyne graminicola]	3.31e-140
Hetgly20099.t1	3.296	7.56621	2.31e-12	0	0.445	Cytoplasm|Extracellular	Nuclear localization signal	KAF7639365.1 Galectin [Meloidogyne graminicola]	6.37e-140
Hetgly02323.t1	2.88021	6.50803	7.32e-11	0	0.423	Cytoplasm	Nuclear localization signal	KAF7639561.1 Ribos_L4_asso_C domain-containing protein [Meloidogyne graminicola]	0
Hetgly21477.t1	3.28144	5.72907	3.88e-12	0	0.47	Nucleus	Nuclear localization signal	KAF7639984.1 MRG domain-containing protein [Meloidogyne graminicola]	2.22e-143
Hg18046.1	3.41958	7.46218	1.32e-20	0	0.229	Cytoplasm	Nuclear localization signal	KAF7640194.1 40S ribosomal protein S12 [Meloidogyne graminicola]	1.34e-63
Hetgly10227.t1	2.4868	7.82065	6.93e-12	0	0.228	Nucleus	Nuclear localization signal	KAH7678262.1 brix domain-containing protein [Aphelenchus avenae]	3.55e-130
Hetgly07025.t1	4.34678	5.88833	2.86e-15	0	0.848	Mitochondrion	Mitochondrial transit peptide	KAH7694343.1 Protein MRPL-14 b [Aphelenchus avenae]	9.09e-62
Hetgly13185.t1	2.34853	6.28888	3.08e-11	0	0.728	Golgi apparatus	Signal peptide|Transmembrane domain	KAH7694910.1 ER lumen protein retaining receptor [Aphelenchus avenae] KAH7706114.1 ER lumen protein retaining receptor [Aphelenchus avenae]	1.3e-117
Hetgly06739.t1	2.866	5.52858	7.93e-11	0	0.624	Cytoplasm|Nucleus	Nuclear export signal	KAH7697211.1 Protein W10D9.6 [Aphelenchus avenae] KAH7727287.1 Protein W10D9.6 [Aphelenchus avenae]	2.27e-51
Hetgly17989.t1	3.06691	7.48618	3.85e-11	0	0.616	Cytoplasm	Nuclear export signal	KAH7700208.1 Protein F33G12.6 b [Aphelenchus avenae]	0
Hetgly15500.t1	3.48034	6.77825	1.04e-13	0	0.712	Mitochondrion	Peroxisomal targeting signal	KAH7702778.1 fis1-related protein [Aphelenchus avenae] KAH7719019.1 fis1-related protein [Aphelenchus avenae]	2.78e-63
Hetgly10620.t1	2.98088	5.40746	7.73e-13	0	0.643	Cytoplasm	0	KAH7706535.1 Protein GLN-3 b [Aphelenchus avenae] KAH7709026.1 Protein GLN-3 b [Aphelenchus avenae]	5.44e-169
Hetgly06729.t1	2.93083	6.25056	9.62e-14	0	0.813	Nucleus	Nuclear localization signal	KAH7714403.1 U1 small nuclear ribonucleoprotein A [Aphelenchus avenae]	4.53e-93
Hg17802.2	2.04611	7.16002	3.43e-11	0	0.688	Nucleus	Nuclear localization signal	KAH7716816.1 cyclophilin-type peptidyl-prolyl cis-trans isomerase-15 [Aphelenchus avenae]	6.06e-71
Hetgly13423.t1	3.0366	6.22028	1.99e-11	0	0.384	Cell membrane	#N/A	KAH7718323.1 Protein C32D5.7 [Aphelenchus avenae]	4.87e-58
Hetgly14182.t1	3.40949	6.74928	7.13e-14	0	0.298	Nucleus	Nuclear localization signal	KAH7720322.1 Protein Y46E12BL.2 [Aphelenchus avenae]	4.88e-109
Hetgly19748.t1	5.2239	5.46847	1.68e-17	0	0.727	Cytoplasm|Nucleus	Nuclear localization signal	KAH7721609.1 Protein APS-2 [Aphelenchus avenae]	4.59e-79
Hg8804.2	3.57256	8.35974	4.03e-12	0	0.043	Cytoplasm|Nucleus	Nuclear localization signal	KAH7724887.1 60S ribosomal protein L27a [Aphelenchus avenae]	1.71e-53
Hetgly01592.t1	3.75095	5.48377	2.66e-12	0	0.546	Cytoplasm	Nuclear localization signal	KAH7725415.1 Plastin-1 [Aphelenchus avenae]	0
Hetgly13297.t1	3.71195	6.60971	1.54e-16	0	0.731	Cytoplasm	#N/A	KAH7725474.1 40S ribosomal protein S11 [Aphelenchus avenae]	1.1e-97
Hg6995.1	3.1942	6.92894	6.31e-13	0	0.397	Cell membrane	Signal peptide|Transmembrane domain	KAH7725483.1 Nematode cuticle collagen [Aphelenchus avenae]	5.9e-29
Hg6996.1	3.56437	8.59219	2.71e-31	0	0.636	Extracellular	#N/A	KAH7725483.1 Nematode cuticle collagen [Aphelenchus avenae]	5.17e-30
Hetgly10265.t1	3.13445	7.34697	4.97e-14	0	0.167	Cell membrane	Signal peptide	KAH7726635.1 Alpha-catulin [Aphelenchus avenae]	0
Hetgly01648.t3	3.4286	6.22188	2.05e-12	0	0.466	Nucleus	Nuclear localization signal	KAH7727003.1 transcription initiation factor IIFalpha subunit [Aphelenchus avenae]	2.33e-61
Hetgly13388.t1	3.12093	6.96603	2.13e-11	0	0.269	Cytoplasm|Nucleus	Nuclear localization signal	KAH7727161.1 cell division control protein [Aphelenchus avenae]	0
Hetgly15709.t1	2.60765	6.16212	1.18e-11	0	0.811	Cytoplasm	Nuclear localization signal	KAH7727199.1 catalase B [Aphelenchus avenae]	1.27e-29
Hetgly09550.t1	2.45033	6.17018	9.14e-11	0	0.228	Nucleus	Nuclear localization signal	KAH7727259.1 3'-5' exonuclease [Aphelenchus avenae]	4.96e-124
Hetgly01559.t1	2.60064	6.87721	4.16e-11	0	0.277	Cytoplasm	Nuclear localization signal	KAH7727396.1 nuclease domain-containing protein [Aphelenchus avenae]	0
Hetgly18314.t1	3.23546	5.85303	1.14e-11	0	0.785	Cytoplasm	Nuclear localization signal	KAH7727561.1 60S ribosomal protein L14 [Aphelenchus avenae]	2.41e-58
Hetgly12034.t1	3.10255	8.74448	4.88e-11	0	0.147	Cytoplasm|Nucleus	Nuclear localization signal	KAH7728128.1 fragile X mental retardation 1 [Aphelenchus avenae]	8.6e-99
Hg5912.4	3.14642	6.61033	9.91e-11	0	0.209	Cytoplasm|Nucleus	Nuclear localization signal	KAH7728343.1 La domain-containing protein [Aphelenchus avenae]	1.94e-130
Hetgly17908.t1	3.54195	6.79678	7.61e-14	0	0.521	Cytoplasm|Nucleus	Nuclear localization signal	KAH7728611.1 30S ribosomal protein S8e [Aphelenchus avenae]	1.98e-152
Hetgly20035.t1	2.69754	7.64339	1.33e-13	0	0.473	Cytoplasm|Nucleus	Nuclear export signal	KAH7729795.1 putative immunogenic protein NIP-2 [Aphelenchus avenae]	2.35e-109
Hg17900.2	2.92224	7.70585	2.93e-14	0	0.305	Cytoplasm	#N/A	KAH7729992.1 7TM GPCR protein [Aphelenchus avenae]	3.75e-146
Hetgly20098.t1	3.27399	8.99544	7.98e-11	0	0.817	Cytoplasm	Nuclear localization signal	KAH7730990.1 60S ribosomal protein L34 [Aphelenchus avenae] KAH7730995.1 60S ribosomal protein L34 [Aphelenchus avenae]	2.39e-52
Hetgly18227.t1	2.93259	6.92927	2.17e-13	0	0.475	Mitochondrion	Mitochondrial transit peptide	KAH7731305.1 CBN-CCO-2 protein [Aphelenchus avenae]	8.35e-72
Hetgly15493.t1	2.45589	8.5598	2.97e-11	0	0.267	Cytoplasm|Nucleus	Nuclear localization signal|Nuclear export signal	KAH7732221.1 protein C33A11.1 [Aphelenchus avenae]	7.25e-121
Hetgly01850.t1	2.62954	7.70986	3.84e-14	0	0.112	Nucleus	Nuclear localization signal	KAI1696853.1 surp module domain-containing protein [Ditylenchus destructor]	0
Hetgly09676.t1	2.64948	7.6027	1.15e-11	0	0.461	Nucleus	Nuclear localization signal	KAI1705087.1 DEAD/DEAH box helicase domain-containing protein [Ditylenchus destructor]	0
Hetgly15644.t1	3.64673	6.2447	5.74e-13	2e-06	0.784	Peroxisome	Peroxisomal targeting signal	KAI1705849.1 SCP-2 sterol transfer family domain-containing protein [Ditylenchus destructor]	0
Hetgly21368.t1	3.15004	8.65897	2.31e-11	0	0.153	Nucleus	Nuclear localization signal	KAI1707040.1 RNA polymerase II transcription elongation factor domain-containing protein [Ditylenchus destructor]	5.81e-21
Hetgly12975.t1	2.59615	7.12494	3e-11	0	0.551	Cytoplasm|Nucleus	Nuclear localization signal	KAI1707513.1 DEAD/DEAH box helicase domain-containing protein [Ditylenchus destructor]	0
Hetgly19819.t1	2.76869	8.08361	4.04e-17	0	0.399	Mitochondrion	Mitochondrial transit peptide	KAI1708293.1 respiratory-chain NADH dehydrogenase, 30 kd subunit domain-containing protein [Ditylenchus destructor]	2.66e-105
Hetgly18737.t1	3.20107	8.41882	8.66e-11	0	0.389	Mitochondrion	Mitochondrial transit peptide	KAI1708901.1 TCP-1/cpn60 chaperonin family domain-containing protein [Ditylenchus destructor]	0
Hetgly21529.t1	3.04809	7.86976	1.47e-11	0	0.218	Nucleus	Nuclear localization signal	KAI1710932.1 TFIIS helical bundle-like domain-containing protein [Ditylenchus destructor]	2.38e-28
Hg16814.1	2.89656	8.24833	1.07e-15	0	0.558	Endoplasmic reticulum	#N/A	KAI1712013.1 glyceraldehyde 3-phosphate dehydrogenase, NAD binding domain-containing protein [Ditylenchus destructor]	1.09e-120
Hetgly15585.t1	2.85054	7.33022	1.43e-11	0	0.387	Cytoplasm	Nuclear localization signal	KAI1712173.1 OTU-like cysteine protease domain-containing protein [Ditylenchus destructor]	6.82e-53
Hetgly04572.t1	3.10755	6.91825	1.33e-13	0	0.66	Cytoplasm|Nucleus	#N/A	KAI1713022.1 RING-H2 zinc finger domain-containing protein [Ditylenchus destructor]	6.44e-33
Hg8167.2	3.42323	10.7024	1.31e-11	0	0.203	Cytoplasm|Extracellular	Signal peptide	KAI1713139.1 papain family cysteine protease domain-containing protein [Ditylenchus destructor]	0
Hetgly21416.t1	2.78047	6.44432	6.31e-11	0	0.228	Nucleus	Nuclear localization signal	KAI1713512.1 eukaryotic DNA topoisomerase i, catalytic core domain-containing protein [Ditylenchus destructor]	0
Hetgly21427.t1	2.44294	8.10168	1.14e-11	0	0.357	Nucleus	Nuclear localization signal	KAI1713512.1 eukaryotic DNA topoisomerase i, catalytic core domain-containing protein [Ditylenchus destructor]	0
Hg16744.1	3.74281	7.67166	3.86e-11	0	0.31	Cytoplasm	#N/A	KAI1713872.1 snf7 domain-containing protein [Ditylenchus destructor]	8.42e-25
Hg16868.1	4.3075	6.19471	5.78e-14	0	0.463	Cytoplasm	#N/A	KAI1713968.1 ABC-2 type transporter domain-containing protein [Ditylenchus destructor]	7.99e-46
Hg17279.2	3.42287	8.14971	1.01e-11	0	0.824	Cytoplasm|Nucleus	Nuclear localization signal|Nuclear export signal	KAI1717340.1 ribosomal protein l21e domain-containing protein [Ditylenchus destructor]	2.49e-91
Hg11027.2	3.08712	7.86546	1.88e-14	0	0.517	Cytoplasm	#N/A	KAI1718747.1 glyoxalase/Bleomycin resistance protein/Dioxygenase superfamily domain-containing protein [Ditylenchus destructor]	1.58e-78
Hetgly08536.t1	3.94465	4.67868	5.95e-13	0	0.586	Cytoplasm	Nuclear export signal	KAI1720095.1 cys/Met metabolism PLP-dependent enzyme domain-containing protein [Ditylenchus destructor]	0
Hg9455.1	4.26852	5.20024	7.01e-11	0	0.409	Cytoplasm	Nuclear localization signal	KAI1720192.1 cdc37 hsp90 binding domain-containing protein [Ditylenchus destructor]	5.71e-25
Hetgly01493.t1	2.93327	8.04032	6.88e-14	0.999836	0.356	Cell membrane|Lysosome/Vacuole	Signal peptide|Transmembrane domain	KAI1720245.1 acyltransferase family domain-containing protein [Ditylenchus destructor]	0
Hetgly01484.t1	2.86071	7.59495	3.7e-11	0	0.486	Nucleus	Nuclear localization signal	KAI1720247.1 mediator of RNA pol II transcription subunit 19 domain-containing protein [Ditylenchus destructor]	9.57e-54
Hetgly01424.t1	3.72808	6.53751	2.93e-14	0	0.616	Cytoplasm	#N/A	KAI1720262.1 acetyl-CoA acetyltransferase [Ditylenchus destructor]	0
Hetgly09851.t1	3.33338	5.47243	1.87e-13	0	0.585	Cytoplasm|Nucleus	Nuclear localization signal|Nuclear export signal	KAI1721089.1 TCP-1/cpn60 chaperonin family domain-containing protein [Ditylenchus destructor]	0
Hetgly21786.t1	2.89003	6.28905	3.62e-12	0	0.389	Cytoplasm|Nucleus	#N/A	KAI1721511.1 sedoheptulokinase [Ditylenchus destructor]	7.62e-81
Hetgly18005.t1	3.57706	6.99221	1e-12	0	0.09	Cell membrane	Transmembrane domain	KAI1721952.1 sugar transporter domain-containing protein [Ditylenchus destructor]	0
Hg1159.4	4.21179	8.01918	5.43e-11	0	0.356	Cytoplasm	#N/A	KAI1722122.1 innexin domain-containing protein [Ditylenchus destructor]	6.19e-21
Hetgly21559.t1	3.44262	8.41469	2.92e-11	0	0.361	Nucleus	Nuclear localization signal	KAI1723433.1 N-glycosidase [Ditylenchus destructor]	1.38e-124
Hetgly10469.t1	3.4477	5.87811	6.76e-11	0	0.098	Nucleus	Nuclear localization signal	KAI1723587.1 RNA recognition motif domain-containing protein [Ditylenchus destructor]	0
Hetgly10061.t1	2.95015	8.4926	1.68e-17	0	0.242	Cytoplasm	Nuclear localization signal	KAI1723887.1 ankyrin repeats (3 copies) domain-containing protein [Ditylenchus destructor]	1.11e-88
Hetgly12920.t1	4.03647	6.32592	1.84e-12	2.8e-05	0.73	Cytoplasm	#N/A	KAI1724604.1 nucleoside transporter domain-containing protein [Ditylenchus destructor]	6.98e-29
Hetgly18622.t1	2.863	7.19819	1.54e-12	0	0.578	Cytoplasm|Nucleus	Nuclear export signal	KAI1724804.1 galactokinase galactose-binding signature domain-containing protein [Ditylenchus destructor]	1.13e-151
Hetgly09746.t1	3.08343	6.15533	2.76e-11	0	0.405	Nucleus	Nuclear localization signal	KAI1724996.1 rad4 beta-hairpin domain 3 domain-containing protein [Ditylenchus destructor]	3.96e-128
Hetgly22167.t1	3.50454	5.55795	1.82e-13	0	0.579	Cytoplasm|Nucleus	#N/A	KAI1725281.1 PCI domain-containing protein [Ditylenchus destructor]	1.65e-36
Hg11990.1	2.16884	8.67127	5.19e-11	0.999769	0.297	Endoplasmic reticulum	Signal peptide	KAI1725554.1 hsp70 protein domain-containing protein [Ditylenchus destructor]	2.11e-139
Hg11990.3	2.87447	6.15086	6.06e-11	0.999769	0.297	Endoplasmic reticulum	Signal peptide	KAI1725554.1 hsp70 protein domain-containing protein [Ditylenchus destructor]	1.36e-40
Hetgly15196.t1	3.23434	7.8992	1.07e-13	0.999588	0.475	Endoplasmic reticulum	Signal peptide	KAI1725617.1 thioredoxin domain-containing protein [Ditylenchus destructor]	0
Hetgly04635.t1	2.78437	6.55938	1.58e-12	0	0.297	Cytoplasm|Nucleus	Nuclear export signal	KAI1725645.1 mutS domain V domain-containing protein [Ditylenchus destructor]	0
Hetgly18942.t1	3.47478	6.16574	6.72e-13	0	0.351	Cell membrane	Signal peptide|Transmembrane domain	KAI1726921.1 ras family domain-containing protein [Ditylenchus destructor] KAI1728323.1 ras family domain-containing protein [Ditylenchus destructor]	6.68e-80
Hg835.1	2.83458	7.17011	3.88e-12	0	0.757	Nucleus	Nuclear localization signal	KAI1727318.1 CAF1 family ribonuclease domain-containing protein [Ditylenchus destructor]	8.24e-43
Hg14832.2	3.61024	6.13738	7.59e-11	0	0.715	Endoplasmic reticulum	#N/A	KAI1727394.1 protein Asterix [Ditylenchus destructor]	5.13e-48
Hg10738.1	3.32208	5.45956	6.87e-11	0	0.155	Nucleus	Nuclear localization signal	KAI1727648.1 ubiquitin carboxyl-terminal hydrolase domain-containing protein [Ditylenchus destructor]	0
Hetgly19889.t1	2.28948	7.88432	7.61e-14	0	0.446	Cytoplasm	Nuclear localization signal	KAI1727800.1 cdc37 hsp90 binding domain-containing protein [Ditylenchus destructor]	2.41e-112
Hetgly01679.t1	3.35433	7.56167	2.17e-12	0	0.071	Cytoplasm|Nucleus	Nuclear localization signal	KAI1727936.1 paf1 domain-containing protein [Ditylenchus destructor]	3.14e-135
Hetgly21517.t1	2.48985	8.41535	5.71e-12	0	0.234	Nucleus	Nuclear localization signal	KAI1728404.1 g-patch domain-containing protein [Ditylenchus destructor]	2.25e-71
Hetgly19957.t1	2.80409	7.57222	1.25e-12	0	0.426	Extracellular	#N/A	KAI1728541.1 immunoglobulin domain-containing protein [Ditylenchus destructor]	1.04e-138
Hetgly17557.t1	3.81645	7.60209	1.64e-13	0	0.401	Cytoplasm|Nucleus	Nuclear localization signal	KAI1728902.1 plectin/S10 domain-containing protein [Ditylenchus destructor]	1.01e-54
Hetgly20289.t1	3.34836	8.48938	2.29e-11	0	0.811	Cytoplasm	Nuclear localization signal	KAI1728922.1 ribosomal protein s19e domain-containing protein [Ditylenchus destructor]	1e-70
Hetgly18138.t1	2.76481	6.9232	9.62e-11	0	0.249	Cytoplasm	Nuclear export signal	KAI1729398.1 JNKSAPK-associated protein-1 domain-containing protein [Ditylenchus destructor]	0
Hetgly06882.t1	3.33849	6.4239	1.28e-11	0	0.369	Cell membrane	Transmembrane domain	KAI1729689.1 sodium:dicarboxylate symporter family domain-containing protein [Ditylenchus destructor]	6.04e-148
Hetgly21790.t1	2.53468	7.54258	1.51e-12	0	0.339	Cytoplasm	Nuclear localization signal	KAI1730043.1 DZF domain-containing protein [Ditylenchus destructor]	5.31e-117
Hetgly04578.t1	2.6119	7.96764	6.32e-12	0	0.263	Nucleus	Nuclear localization signal	KAI1730701.1 remodeling and spacing factor 1 [Ditylenchus destructor]	1.88e-67
Hetgly04213.t1	3.63863	7.60076	1.68e-17	0	0.154	Nucleus	Nuclear localization signal	KAI1730751.1 MAM domain, meprin/A5/mu domain-containing protein [Ditylenchus destructor]	6.11e-69
Hetgly04230.t1	2.83045	7.31012	6.98e-11	0	0.036	Nucleus	Nuclear localization signal	KAI1730812.1 pre-mRNA splicing factor component domain-containing protein [Ditylenchus destructor]	0
Hetgly17891.t1	3.22679	6.69396	1.42e-12	0	0.504	Cytoplasm|Nucleus	Nuclear localization signal	KAI1731163.1 ribosomal protein s19 domain-containing protein [Ditylenchus destructor]	3.85e-83
Hetgly01325.t1	3.87294	5.72233	7.72e-13	0	0.897	Cytoplasm|Nucleus	Nuclear localization signal|Nuclear export signal	KAI1731729.1 protein kinase domain-containing protein [Ditylenchus destructor]	1.24e-152
Hetgly07327.t1	4.39816	6.59487	9.41e-14	0.999826	0.404	Cell membrane|Lysosome/Vacuole	Signal peptide|Transmembrane domain	KAI1732229.1 leucine rich repeat domain-containing protein [Ditylenchus destructor]	1.06e-66
Hetgly13194.t1	3.14471	7.26527	5.73e-11	2e-06	0.352	Golgi apparatus	Signal peptide|Transmembrane domain	KAI1732555.1 core-2/I-Branching enzyme domain-containing protein [Ditylenchus destructor]	5.36e-117
Hetgly06571.t1	3.2168	7.29653	2.72e-16	0	0.404	Nucleus	Nuclear localization signal	KAI1733319.1 cyclin-related protein FAM58A [Ditylenchus destructor]	5.56e-69
Hetgly01560.t1	2.96692	6.79647	1.57e-12	0	0.321	Nucleus	Nuclear localization signal	KHN74767.1 Pre-rRNA-processing protein TSR1 -like protein [Toxocara canis]	0
Hg10485.1	3.94726	5.59212	3.88e-12	0.369217	0.566	Cytoplasm|Nucleus|Extracellular	#N/A	KHN82576.1 DNA-binding protein HEXBP [Toxocara canis]	2.11e-21
Hetgly18109.t1	4.52636	4.50884	5.09e-13	0	0.905	Mitochondrion	Mitochondrial transit peptide	KHN88347.1 28S ribosomal protein S18a, mitochondrial [Toxocara canis]	3e-60
Hetgly18092.t1	3.48877	7.36542	8.09e-12	0	0.349	Nucleus	Nuclear localization signal	NP_001021125.1 CWF19-like protein 2 homolog [Caenorhabditis elegans] Q10946.2 RecName: Full=CWF19-like protein 2 homolog	9.19e-69
Hetgly09992.t1	3.91396	7.47839	2.03e-17	0	0.275	Cytoplasm	#N/A	OAO11963.1 60S ribosomal protein L8 [Blastocystis sp. ATCC 50177/Nand II]	2.1e-43
Hetgly21512.t1	2.8582	8.96655	5.09e-13	0	0.279	Nucleus	Nuclear localization signal	OZC06095.1 zinc finger, C2H2 type [Onchocerca flexuosa]	1.29e-46
Hetgly07578.t1	3.50403	6.10429	1.42e-12	0	0.7	Nucleus	Nuclear localization signal	XP_015819260.1 PREDICTED: histone H3.3 isoform X1 [Nothobranchius furzeri]	3.97e-92
Hetgly02038.t1	3.09727	6.79188	1.78e-13	0	0.395	Cytoplasm	Nuclear export signal	XP_024501911.1 Cysteine/histidine-rich domain and CS domain and HSP20-like chaperone domain-containing protein [Strongyloides ratti]	4.8e-60
Hg16689.2	3.64018	7.88918	1.73e-13	0	0.506	Nucleus	Nuclear localization signal	XP_031413010.1 ubiquitin-60S ribosomal protein L40 isoform X1 [Meleagris gallopavo]	8.88e-52
Hetgly01271.t1	4.21554	7.66434	7.64e-15	0	0.649	Cytoplasm|Nucleus	Nuclear localization signal	XP_037044374.1 nucleolar protein dao-5-like isoform X1 [Bradysia coprophila]	5.73e-23
Hetgly01292.t1	4.16999	7.51923	6.72e-13	0.16661	0.557	Extracellular	#N/A	XP_037044374.1 nucleolar protein dao-5-like isoform X1 [Bradysia coprophila]	3.39e-22
Hetgly10310.t1	3.68744	4.68073	9.29e-13	1.6e-05	0.451	Cell membrane	Signal peptide|Transmembrane domain	#N/A	#N/A
Hg4745.1	3.30709	6.91803	1.36e-13	0	0.881	Cell membrane	Nuclear localization signal	#N/A	#N/A
Hetgly07699.t1	3.87386	7.32362	8.54e-14	0.449518	0.639	Cytoplasm	#N/A	#N/A	#N/A
Hg8373.1	3.71644	6.58629	7.7e-14	0	0.679	Cytoplasm	#N/A	#N/A	#N/A
Hetgly15004.t1	2.92365	8.05604	3.58e-15	0	0.557	Cytoplasm	Nuclear localization signal	#N/A	#N/A
Hetgly17937.t1	4.28437	5.23816	9.62e-14	0	0.772	Cytoplasm	#N/A	#N/A	#N/A
Hetgly21417.t1	3.08421	6.05393	9.14e-11	0	0.371	Cytoplasm	Nuclear localization signal|Nuclear export signal	#N/A	#N/A
Hetgly21726.t1	3.56962	6.65493	4.13e-14	0	0.686	Cytoplasm	#N/A	#N/A	#N/A
Hetgly11829.t1	3.01319	7.29539	4.26e-12	0	0.45	Cytoplasm|Cell membrane	#N/A	#N/A	#N/A
Hg10983.1	4.35323	5.78627	3.81e-16	0	0.357	Cytoplasm|Nucleus	Nuclear localization signal	#N/A	#N/A
Hetgly09986.t1	2.84356	10.9067	1.64e-11	0	0.335	Cytoplasm|Nucleus	Nuclear localization signal	#N/A	#N/A
Hg8730.2	2.60102	7.77867	4.64e-11	0.332708	0.402	Cytoplasm|Nucleus	Nuclear localization signal	#N/A	#N/A
Hetgly18487.t1	2.57193	5.5042	9.01e-13	0	0.432	Cytoplasm|Nucleus	Nuclear localization signal	#N/A	#N/A
Hetgly21523.t1	4.40319	5.4786	8.52e-12	0.000138	0.934	Endoplasmic reticulum	Signal peptide	#N/A	#N/A
Hetgly02290.t1	2.85243	7.38656	2.34e-12	0.999856	0.696	Extracellular	Signal peptide	#N/A	#N/A
Hetgly06908.t1	4.2133	5.44228	5.23e-13	0.999827	0.694	Extracellular	Signal peptide	#N/A	#N/A
Hetgly08734.t1	3.35966	7.55801	5.16e-11	0.999816	0.925	Extracellular	Signal peptide	#N/A	#N/A
Hg5744.1	4.01099	6.38869	5.25e-16	0	0.514	Extracellular	#N/A	#N/A	#N/A
Hetgly00632.t1	2.76432	8.92253	5.65e-14	0	0.474	Mitochondrion	Mitochondrial transit peptide	#N/A	#N/A
Hetgly09989.t1	2.66944	7.5492	3.05e-13	0	0.788	Nucleus	Nuclear localization signal	#N/A	#N/A
Hetgly10250.t1	3.18342	5.87154	1.08e-11	0	0.702	Nucleus	Nuclear localization signal	#N/A	#N/A
Hetgly19671.t1	3.61023	6.06703	2.09e-12	0	0.386	Nucleus	Nuclear localization signal	#N/A	#N/A
Hetgly20310.t1	3.78979	6.05414	1.37e-12	0	0.131	Nucleus	Nuclear localization signal	#N/A	#N/A
Hetgly20338.t1	3.12965	8.3482	6.55e-11	0	0.191	Nucleus	Nuclear localization signal	#N/A	#N/A
Hetgly21546.t1	3.40924	6.64196	1.11e-11	0	0.457	Nucleus	Nuclear localization signal	#N/A	#N/A

## Sheet: Supp. Table 4
Single nematode transcriptomic analysis, using long-read technology, reveals two novel virulence gene candidates in the soybean cyst nematode, Heterodera glycines
Dave T. Ste-Croix 1,2, Richard R. Bélanger 2,,3 and Benjamin Mimee1
1 Saint-Jean-sur-Richelieu Research and Development Centre, Agriculture and Agri-Food Canada, Saint-Jean-sur-Richelieu, Québec, Canada
2 Département de Phytologie, Université Laval, Québec, Québec, Canada
3 Centre de recherche et d'innovation sur les végétaux (CRIV), Université Laval, Québec, Québec, Canada
Supp. Table 4. Primer sequences used in qPCR validation and in amplicon sequencing of candidate transcripts identified in Heterodera glycines with associated amplicon length.
Primer	Sequence [5’- 3’]	Amplicon length (bp)
Hg08859_Fwd_qPCR	GAT GAA GGC CGA AAT TTA CCA C	110
Hg08859_Rev_qPCR	CAG GTG CAA TCC TCC TCA AT
Hg16414_Fwd_qPCR	ATG TCC ATT TTC GCA TCG	160
Hg16414_Rev_qPCR	TTG ATC ACT CTT TTT CCC CC
Act_HK_Fwd	TCT GAC GCT GAA GTA CCC	93
Act_HK_Rev	ACG CAG CTC GTT GTA GAA
Hg-CPZ-1_FG_Fwd	GTT TTG TGC TCT TCG CTG G	776
Hg-CPZ-1_FG_Rev	TAT CCT CAT TCG TTC GCT CTT T
